# Supplementary material for: Efficient Full-Length RNA Isoform Reconstruction with ISAtools
Source: Research Square preprint supplement (doi:10.21203/rs.3.rs-7019918/v1), 2025-08-07
Supplement: Supplementary file 1 [file a24b3cfd8aeba3f085f9f5f6.pdf]

## **Supplementary Information**

### **TABLE OF CONTENTS**

#### **Supplementary Figures**

Supplementary Figure 1. SQANTI Classification of SSCs Across Datasets.

Supplementary Figure 2. Precision and Recall of SSC Identification.

Supplementary Figure 3. Precision and Recall of novel SSC Detection.

Supplementary Figure 4. Precision and Recall of TSS/TES Identification.

Supplementary Figure 5. SQANTI Classification of Isoforms Identified by Different Tools.

Supplementary Figure 6. Similarity of Predicted Unique SSC.

Supplementary Figure 7. Overlap of Unique SSCs Identified Under No and Full Annotation per Tool.

Supplementary Figure 8. Comparative Analysis of TSS and TES Matching Between ISAtools and Mandalorion.

Supplementary Figure 9. Distribution of File System Inputs and Outputs Across Simulated Datasets.

Supplementary Figure 10. Distribution of File System Inputs and Outputs Across UHRR.

#### **Supplementary Tables**

Supplementary Table 1. Simulated Data (human) Summary Based on Real Transcriptomic Profiles for Benchmarking.

Supplementary Table 2. Simulated Data (mouse) Summary Based on Real Transcriptomic Profiles for Benchmarking.

Supplementary Table 3. Transcriptomic Complexity of UHRR and SIRV Datasets.

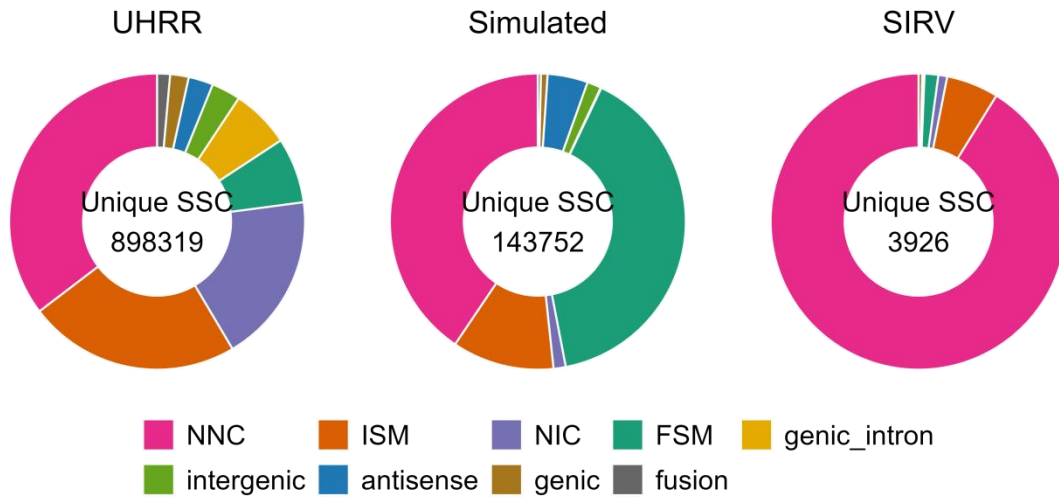

**Supplementary Figure 1 | SQANTI Classification of SSCs Across Datasets.** Based on real RNA-seq data, simulated, and SIRV data, we analyzed SSCs using SQANTI. Most errors fall into the ISM (Incomplete Splice Match), NIC (Novel In Catalog), and NNC (Novel Not in Catalog) categories, while FSM (Full Splice Match) represents accurate matches to known annotations.

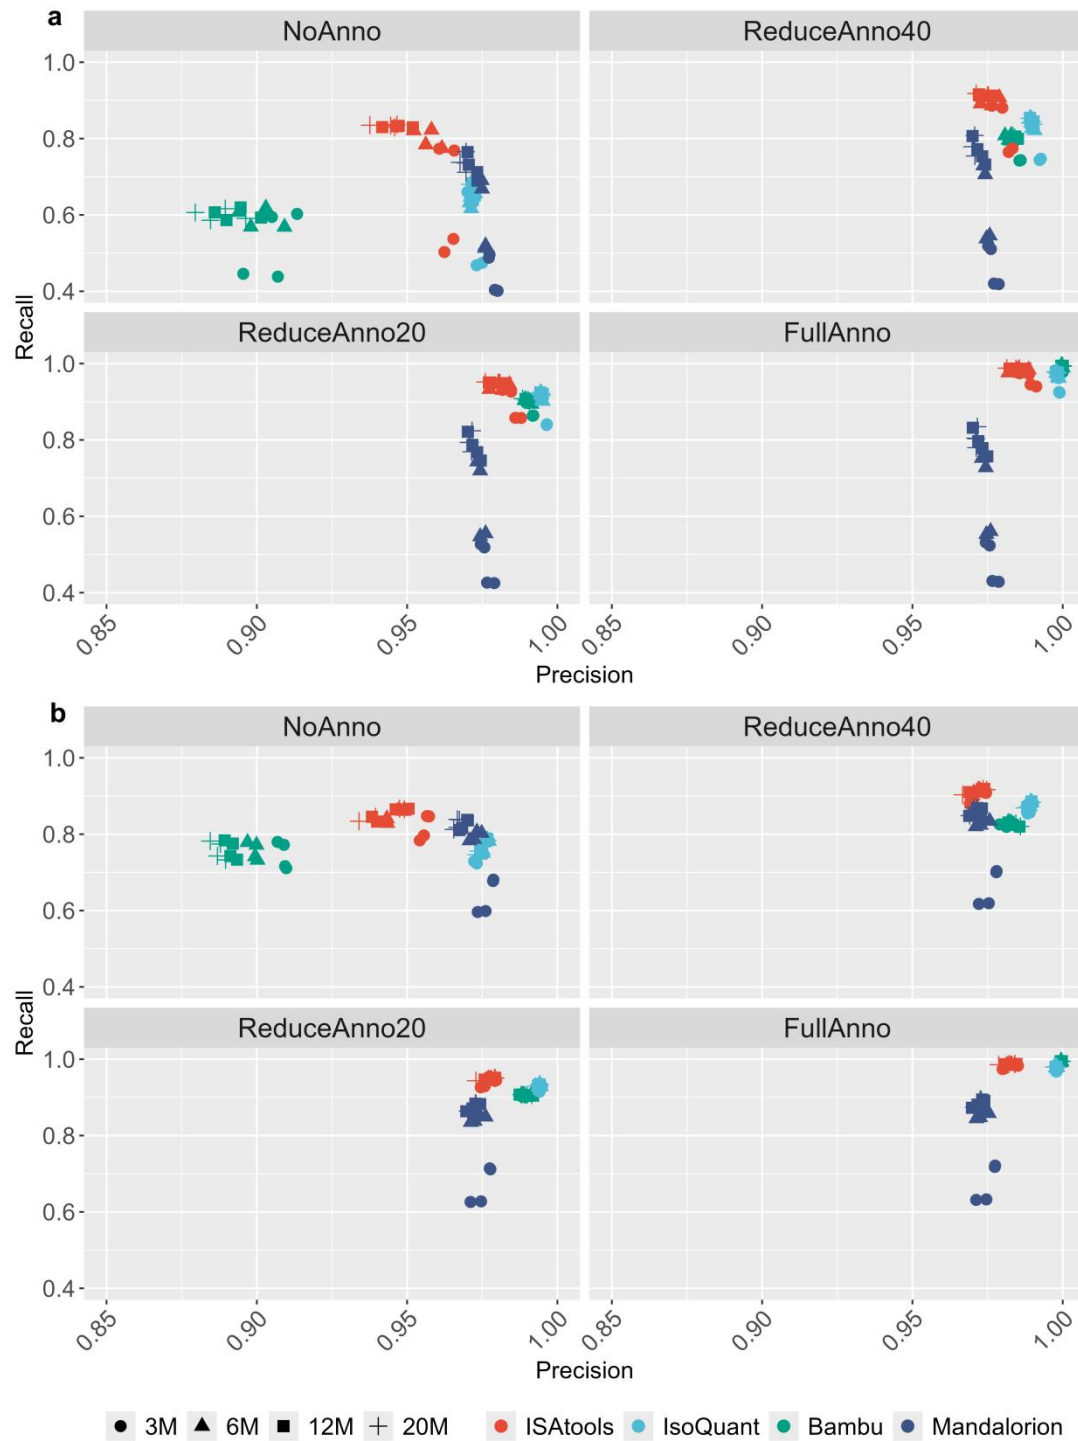

**Supplementary Figure 2 | Precision and Recall of SSC Identification.** Each point represents precision and recall for SSC identification at varying sequencing depths and annotation conditions in simulated human (**a**) and mouse (**b**) datasets.

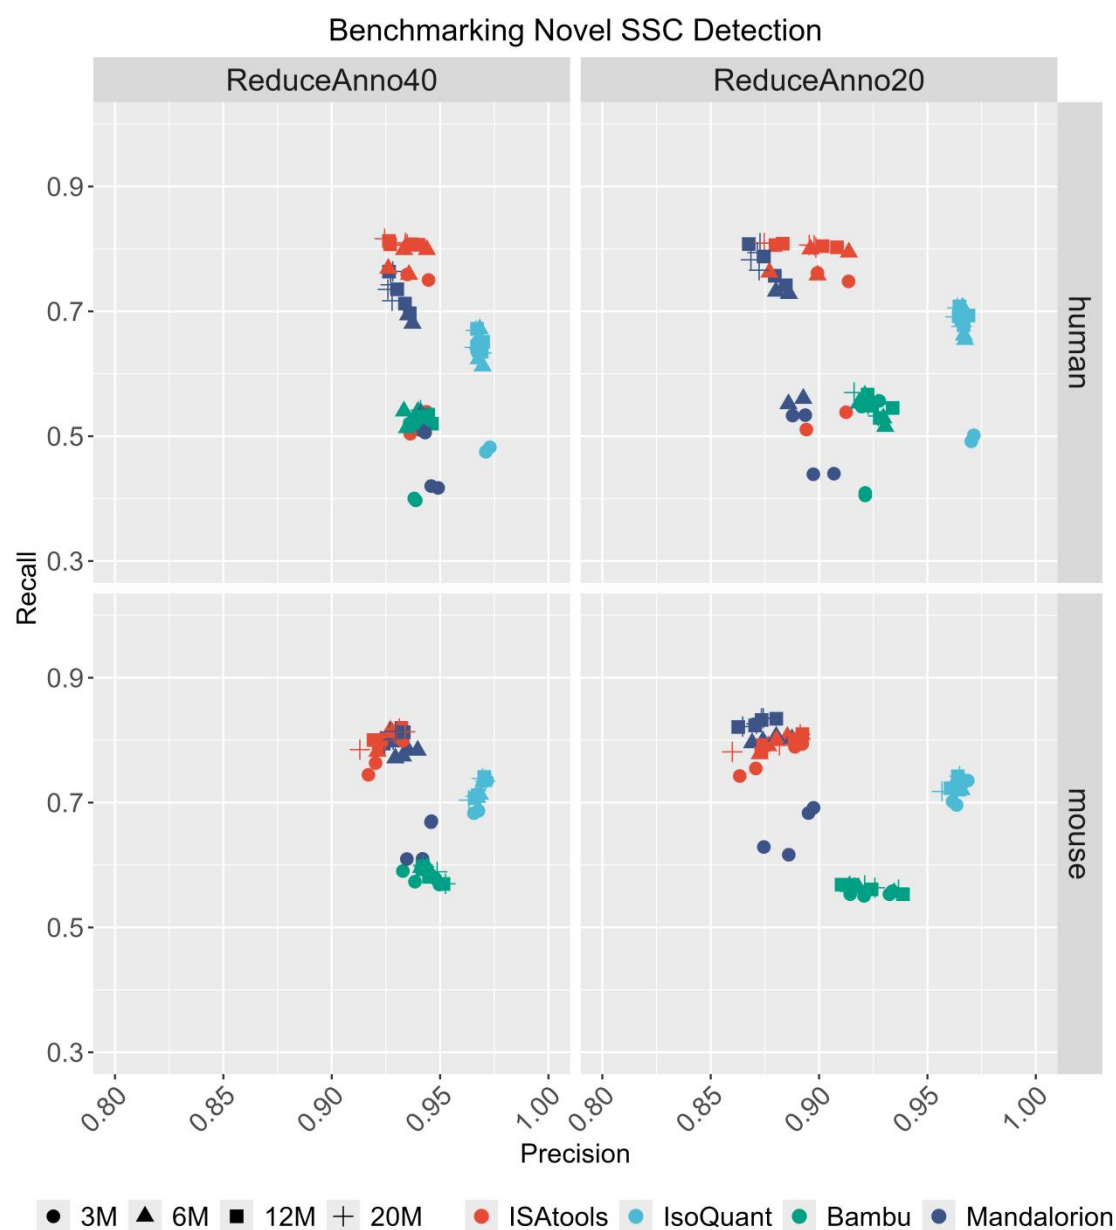

**Supplementary Figure 3 | Precision and Recall of novel SSC Detection.** Each point represents the precision and recall of novel SSC detection at varying sequencing depths under reduced annotation in simulated human and mouse datasets.

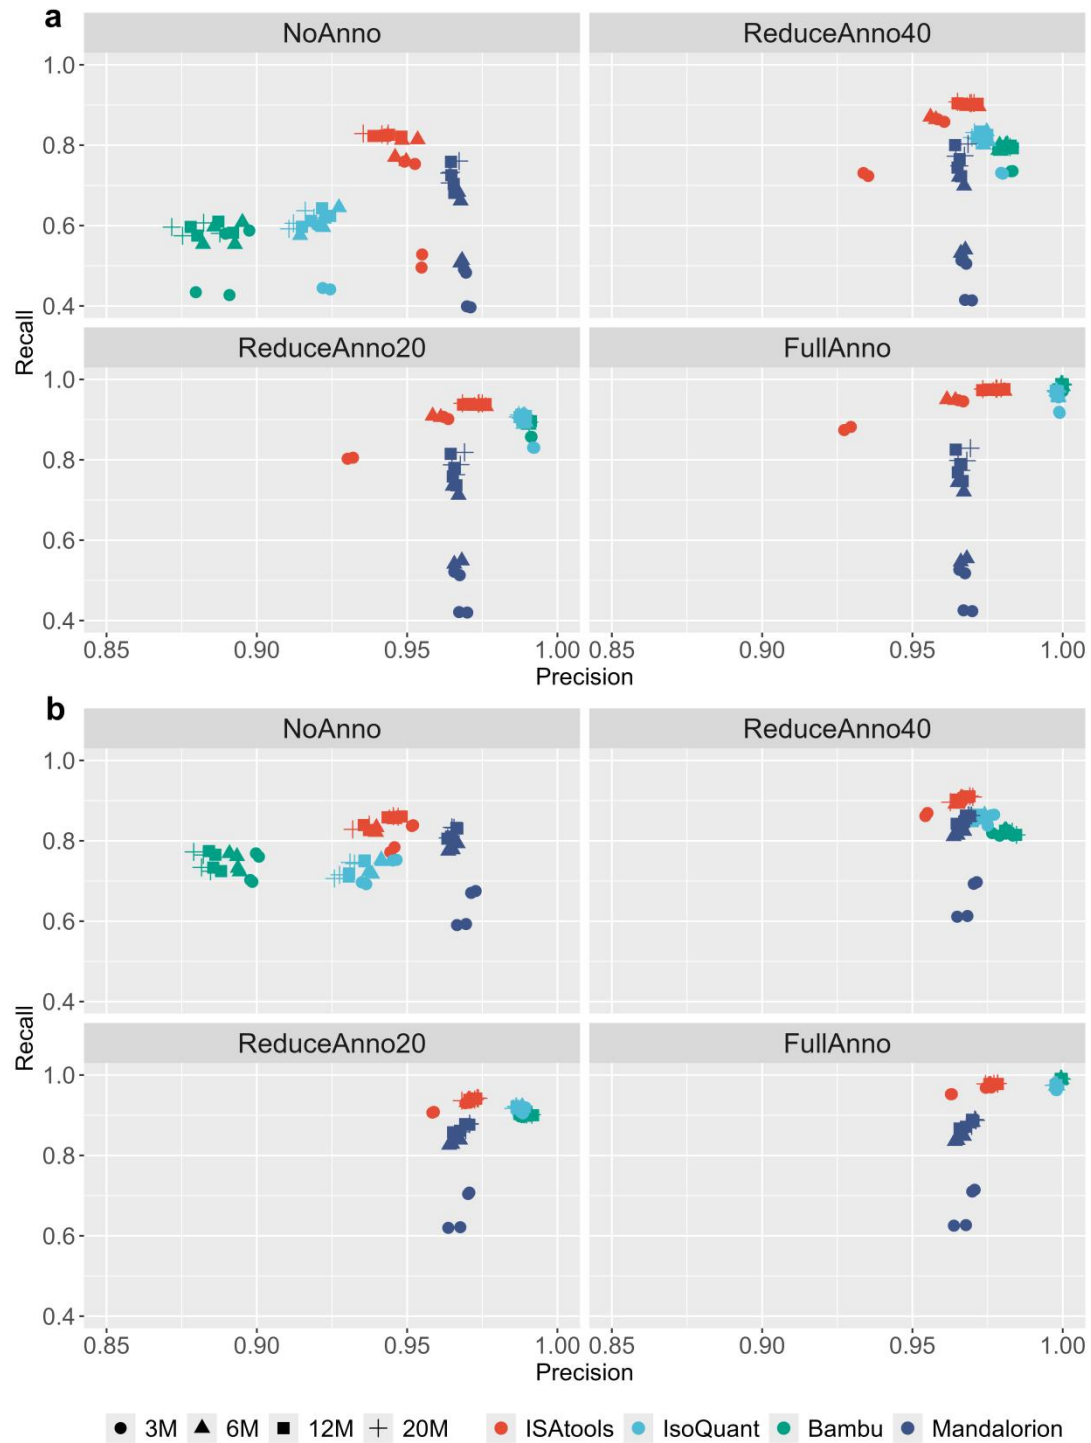

**Supplementary Figure 4 | Precision and Recall of TSS/TES Identification.** Each point represents precision and recall for TSS/TES identification at varying sequencing depths and annotation conditions in simulated human (**a**) and mouse (**b**) datasets.

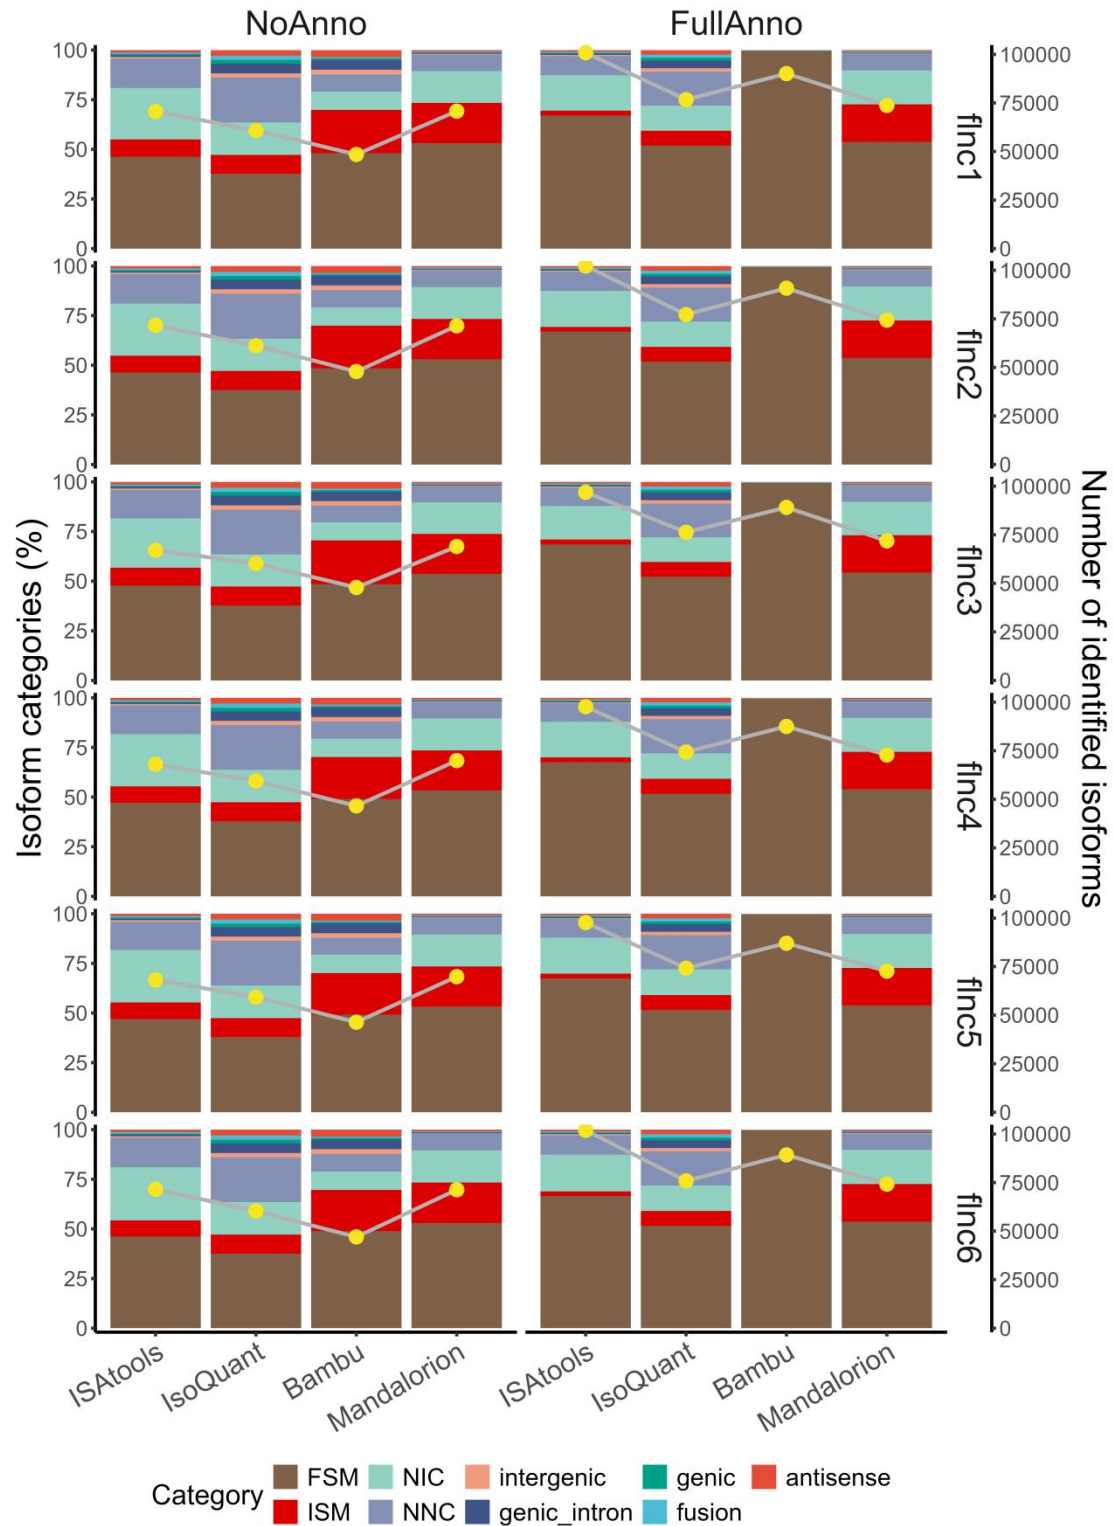

**Supplementary Figure 5 | SQANTI Classification of Isoforms Identified by Different Tools.** SQANTI classification of isoforms identified by various tools across six UHRR samples (flnc1-6). For each sample, bar plots (left y-axis) show the percentage of isoforms in each SQANTI category, while line plots (right y-axis) indicate the total number of predicted isoforms.

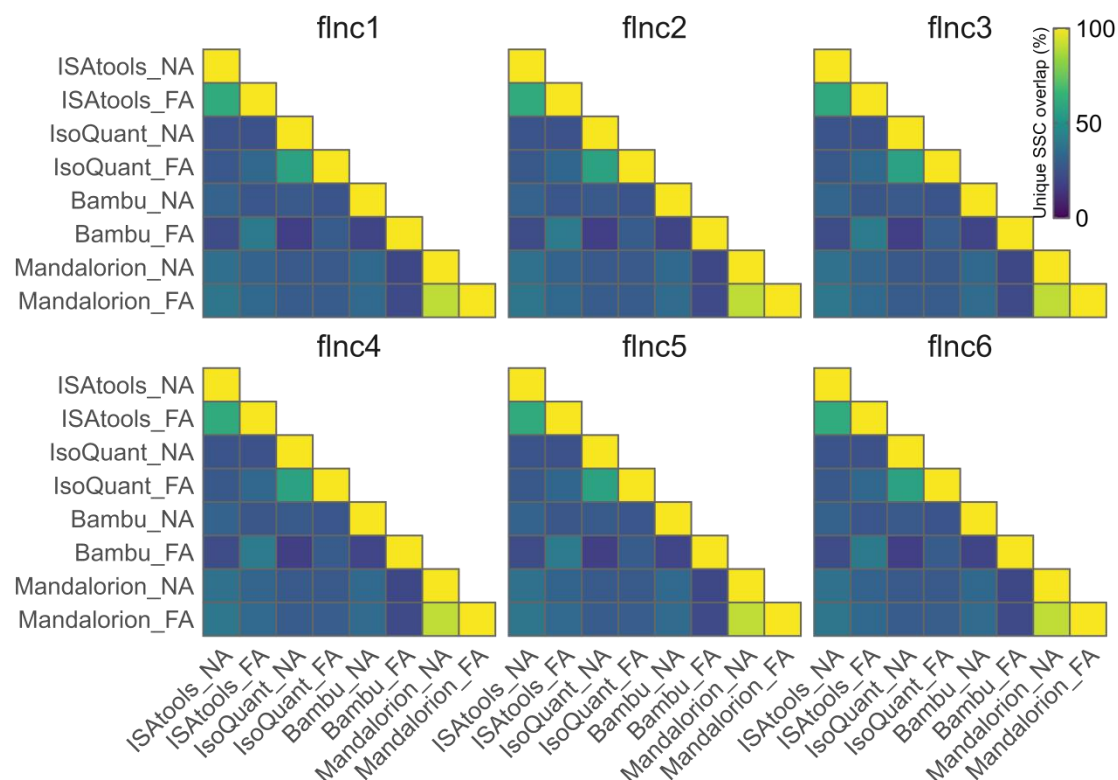

**Supplementary Figure 6 | Similarity of Predicted Unique SSC.** Heatmap showing pairwise similarity of unique SSCs predicted by different tools under full annotation (FA) and no annotation (NA) conditions.

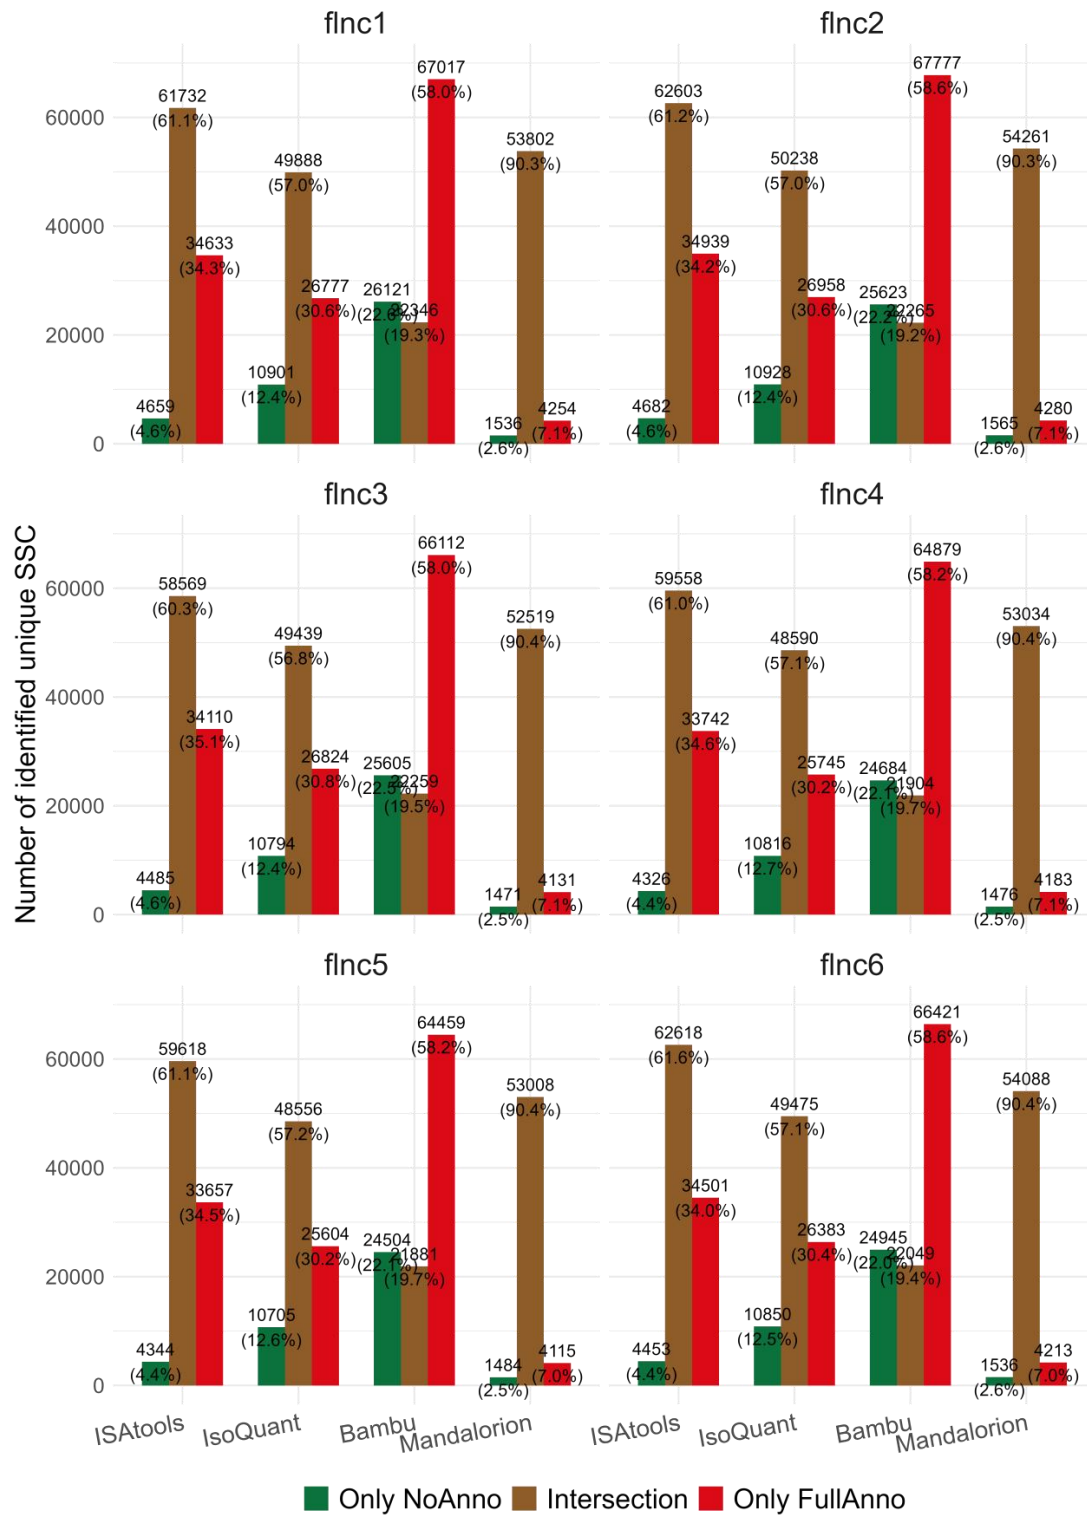

**Supplementary Figure 7 | Overlap of Unique SSCs Identified Under No and Full Annotation per Tool.** Bar plots showing the number of unique SSCs identified by each tool under no annotation only (left bar), both annotation conditions (middle bar, intersection), and full annotation only (right bar), across six UHRR samples. The distribution illustrates each tool's sensitivity to the presence or absence of reference annotation.



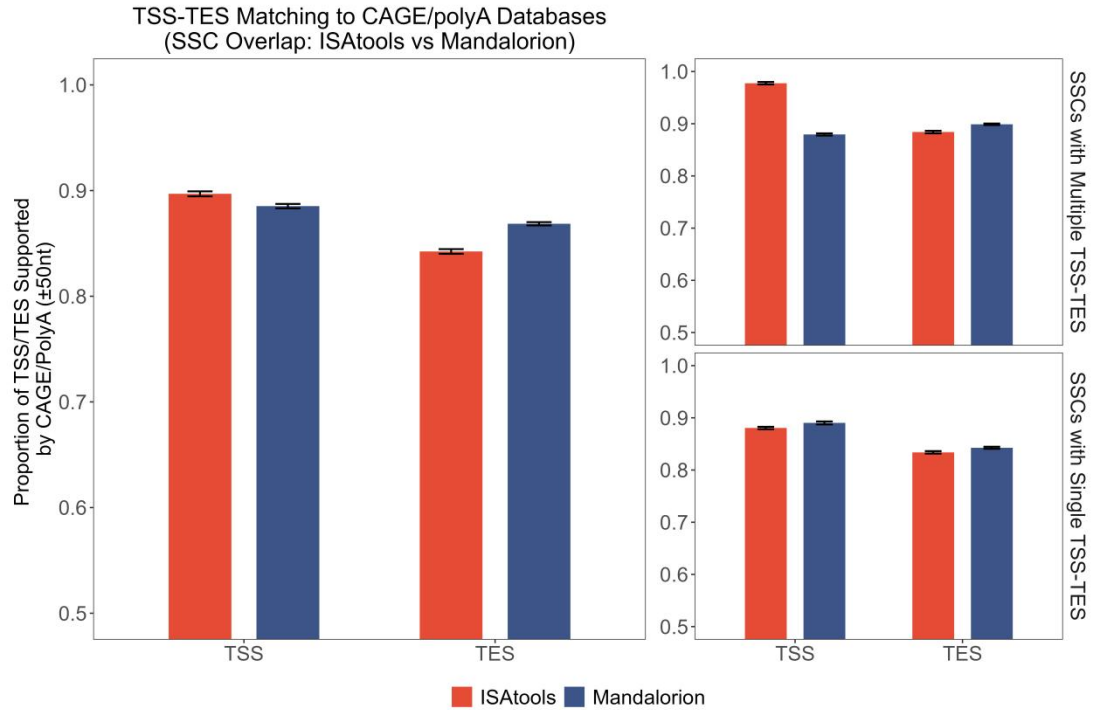

**Supplementary Figure 8 | Comparative Analysis of TSS and TES Matching Between ISAtools and Mandalorion.** Under the FullAnno annotation condition on UHRR datasets, SSCs jointly identified by ISAtools and Mandalorion were benchmarked against reference TSS and TES from the CAGE peaks and polyASite databases. The analysis assessed overall TSS/TES concordance, as well as concordance within unique SSCs containing multiple or single TSS-TES pairs.

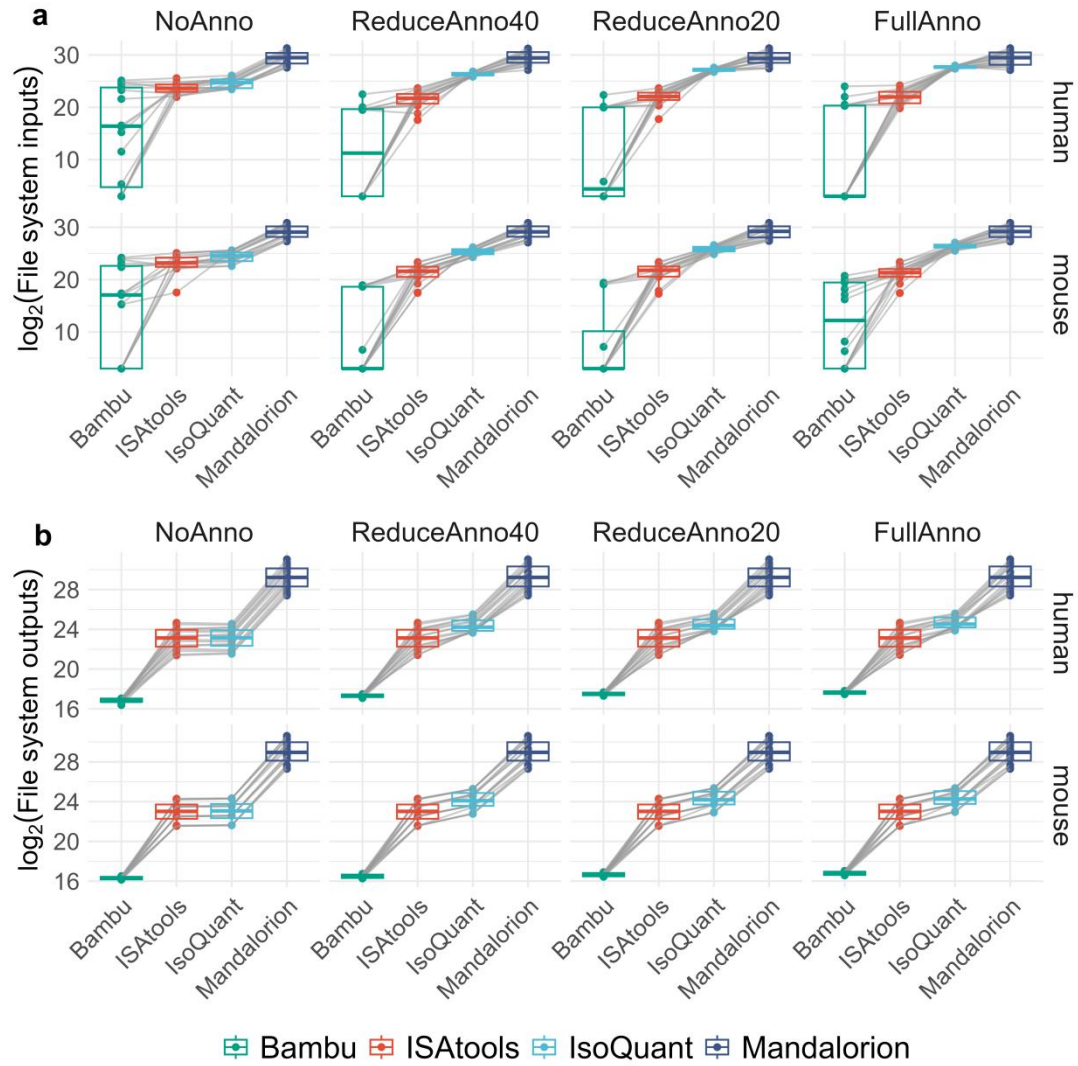

**Supplementary Figure 9 | Distribution of File System Inputs and Outputs Across Simulated Datasets.** Boxplots showing the distribution of file system inputs (**a**) and outputs (**b**) across all simulated datasets. Each dot represents an individual input or output, and lines connect points originating from the same simulation, illustrating paired relationships.

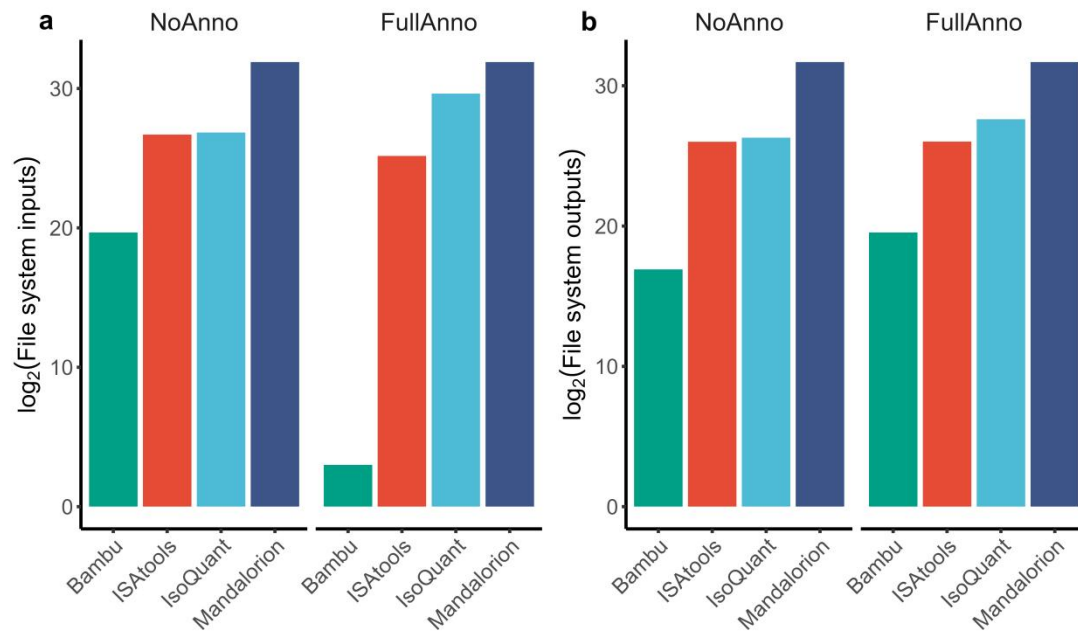

**Supplementary Figure 10 | Distribution of File System Inputs and Outputs Across UHRR.** Bar plots showing the number of file system inputs (a) and outputs (b) generated by each tool on the full UHRR dataset under multi-sample mode.

Supplementary Tables

| Species | Biosample<br>summary              | Accession       | Simulated GTF<br>(Transcript Annotation) |                   |                      | Simulated Sequencing Data (Reads) |                     |                                 |
|---------|-----------------------------------|-----------------|------------------------------------------|-------------------|----------------------|-----------------------------------|---------------------|---------------------------------|
|         |                                   |                 | Total<br>Genes                           | Total<br>Isoforms | Isoforms<br>per Gene | Simulated Depth<br>(Read Count)   | Total Unique<br>SSC | Average Read Support<br>per SSC |
| Human   | Dorsolateral<br>prefrontal cortex | ENCFF708BOP     | 24025                                    | 83505             | 3.5                  | 3M                                | 110705              | 26                              |
|         |                                   |                 |                                          |                   |                      | 6M                                | 131130              | 43                              |
|         |                                   |                 |                                          |                   |                      | 12M                               | 160137              | 71                              |
|         |                                   |                 |                                          |                   |                      | 20M                               | 188715              | 100                             |
|         |                                   | ENCFF827DU<br>W | 24089                                    | 80748             | 3.4                  | 3M                                | 115535              | 25                              |
|         |                                   |                 |                                          |                   |                      | 6M                                | 136968              | 42                              |
|         |                                   |                 |                                          |                   |                      | 12M                               | 168245              | 68                              |
|         |                                   |                 |                                          |                   |                      | 20M                               | 201586              | 94                              |
|         | Heart left<br>ventricle           | ENCFF537NCV     | 17485                                    | 58295             | 3.3                  | 3M                                | 89718               | 33                              |
|         |                                   |                 |                                          |                   |                      | 6M                                | 111355              | 53                              |
|         |                                   |                 |                                          |                   |                      | 12M                               | 143752              | 82                              |
|         |                                   |                 |                                          |                   |                      | 20M                               | 176776              | 111                             |
|         |                                   | ENCFF615FIC     | 18600                                    | 59805             | 3.2                  | 3M                                | 101604              | 29                              |
|         |                                   |                 |                                          |                   |                      | 6M                                | 127363              | 46                              |
|         |                                   |                 |                                          |                   |                      | 12M                               | 166524              | 70                              |
|         |                                   |                 |                                          |                   |                      | 20M                               | 209897              | 93                              |

**Supplementary Table 1 | Simulated Data (human) Summary Based on Real Transcriptomic Profiles for Benchmarking.** This table presents simulated datasets generated by IsoSeqSim using expression profiles derived from real transcriptomic data. It includes transcript annotation complexity (e.g., gene and isoform counts, isoforms per gene) alongside key simulation metrics such as sequencing depth and unique SSC support, providing the foundation for downstream benchmarking analyses.

| Species | Biosample<br>summary    | Accession       | Simulated GTF<br>(Transcript Annotation) |                   |                      | Simulated Sequencing Data (Reads) |                     |                                 |
|---------|-------------------------|-----------------|------------------------------------------|-------------------|----------------------|-----------------------------------|---------------------|---------------------------------|
|         |                         |                 | Total<br>Genes                           | Total<br>Isoforms | Isoforms<br>per Gene | Simulated Depth<br>(Read Count)   | Total Unique<br>SSC | Average Read Support<br>per SSC |
| Mouse   | Left cerebral<br>cortex | ENCFF565RL<br>W | 19415                                    | 43699             | 2.3                  | 3M                                | 75382               | 37                              |
|         |                         |                 |                                          |                   |                      | 6M                                | 95188               | 59                              |
|         |                         |                 |                                          |                   |                      | 12M                               | 124202              | 91                              |
|         |                         |                 |                                          |                   |                      | 20M                               | 155173              | 121                             |
|         |                         | ENCFF325BXV     | 18481                                    | 39850             | 2.2                  | 3M                                | 70667               | 40                              |
|         |                         |                 |                                          |                   |                      | 6M                                | 89428               | 63                              |
|         |                         |                 |                                          |                   |                      | 12M                               | 118060              | 96                              |
|         |                         |                 |                                          |                   |                      | 20M                               | 148092              | 127                             |
|         | Heart                   | ENCFF584WW<br>A | 15228                                    | 30298             | 2.0                  | 3M                                | 54129               | 53                              |
|         |                         |                 |                                          |                   |                      | 6M                                | 68102               | 85                              |
|         |                         |                 |                                          |                   |                      | 12M                               | 88982               | 130                             |
|         |                         |                 |                                          |                   |                      | 20M                               | 110860              | 174                             |
|         |                         | ENCFF860CBL     | 15727                                    | 31563             | 2.0                  | 3M                                | 56534               | 51                              |
|         |                         |                 |                                          |                   |                      | 6M                                | 71207               | 81                              |
|         |                         |                 |                                          |                   |                      | 12M                               | 93605               | 124                             |
|         |                         |                 |                                          |                   |                      | 20M                               | 117134              | 165                             |

**Supplementary Table 2 | Simulated Data (mouse) Summary Based on Real Transcriptomic Profiles for Benchmarking.** This table presents simulated datasets generated by IsoSeqSim using expression profiles derived from real transcriptomic data. It includes transcript annotation complexity (e.g., gene and isoform counts, isoforms per gene) alongside key simulation metrics such as sequencing depth and unique SSC support, providing the foundation for downstream benchmarking analyses.

| Dataset Name                     | Download Link                                                                                                                                                                                               | Sample | Complete GTF (Transcript Annotation) |                |                   | Sequencing Data (Reads) |                              |
|----------------------------------|-------------------------------------------------------------------------------------------------------------------------------------------------------------------------------------------------------------|--------|--------------------------------------|----------------|-------------------|-------------------------|------------------------------|
|                                  |                                                                                                                                                                                                             |        | Total Genes                          | Total Isoforms | Isoforms per Gene | Total Unique SSC        | Average Read Support per SSC |
| KinnexRelease-UHRR2024-RevioSPRQ | <a href="https://downloads.pacbcloud.com/public/dataset/Kinnex-full-length-RNA/DATA-RevioSPRQ-UHRR2024/">https://downloads.pacbcloud.com/public/dataset/Kinnex-full-length-RNA/DATA-RevioSPRQ-UHRR2024/</a> | FLNC-1 | 54117                                | 356707         | 6.6               | 898319                  | 11.6                         |
|                                  |                                                                                                                                                                                                             | FLNC-2 |                                      |                |                   | 944449                  | 11.1                         |
|                                  |                                                                                                                                                                                                             | FLNC-3 |                                      |                |                   | 887981                  | 10.7                         |
|                                  |                                                                                                                                                                                                             | FLNC-4 |                                      |                |                   | 880023                  | 10.7                         |
|                                  |                                                                                                                                                                                                             | FLNC-5 |                                      |                |                   | 875404                  | 10.8                         |
|                                  |                                                                                                                                                                                                             | FLNC-6 |                                      |                |                   | 932939                  | 11.1                         |
| SIRV                             | <a href="https://downloads.pacbcloud.com/public/dataset/UHR_IsoSeq/">https://downloads.pacbcloud.com/public/dataset/UHR_IsoSeq/</a>                                                                         | SIRV   | 7                                    | 61             | 8.7               | 3926                    | 25.2                         |

**Supplementary Table 3 | Transcriptomic Complexity of UHRR and SIRV Datasets.** This table summarizes the annotation complexity and sequencing support of real UHRR and SIRV datasets, including gene and isoform counts, isoforms per gene, the total number of unique SSCs identified from sequencing data, and the average read support per unique SSC.
