# Supplementary material for: Efficient Full-Length RNA Isoform Reconstruction with ISAtools
Source: Research Square preprint supplement (doi:10.21203/rs.3.rs-7019918/v1), 2025-08-07
Supplement: Supplementary file 1 [file d18f961c17544100e82e1b2d.xlsx]

## Sheet: Sfig1
Category	Count	sample
novel_not_in_catalog	317702	UHRR
incomplete-splice_match	207991	UHRR
novel_in_catalog	166882	UHRR
full-splice_match	64199	UHRR
genic_intron	57926	UHRR
intergenic	28435	UHRR
antisense	24276	UHRR
genic	18236	UHRR
fusion	12672	UHRR
novel_not_in_catalog	58295	Simulated
full-splice_match	57365	Simulated
incomplete-splice_match	16026	Simulated
antisense	6336	Simulated
intergenic	2203	Simulated
novel_in_catalog	1909	Simulated
genic	1043	Simulated
fusion	474	Simulated
genic_intron	101	Simulated
novel_not_in_catalog	3580	SIRV
incomplete-splice_match	224	SIRV
full-splice_match	59	SIRV
novel_in_catalog	38	SIRV
genic	16	SIRV
antisense	9	SIRV

## Sheet: figure2A figure3B Sfig2 Sfig4
SSC_Precision	SSC_Recall	SSC_F1score	TssTes_Precision	TssTes_Recall	TssTes_F1score	sample	depth	tools	anno	source
0.907	0.4383	0.591	0.8909	0.427	0.5773	human_brain_rep1	3M	Bambu	NoAnno	human
0.9996	0.9784	0.9889	0.9996	0.9723	0.9858	human_brain_rep1	3M	Bambu	FullAnno	human
0.9918	0.8634	0.9232	0.9912	0.8571	0.9193	human_brain_rep1	3M	Bambu	ReduceAnno20	human
0.9856	0.7423	0.8468	0.9828	0.735	0.841	human_brain_rep1	3M	Bambu	ReduceAnno40	human
0.9092	0.5684	0.6995	0.8927	0.5535	0.6834	human_brain_rep1	6M	Bambu	NoAnno	human
0.9998	0.9909	0.9953	0.9998	0.9847	0.9922	human_brain_rep1	6M	Bambu	FullAnno	human
0.991	0.897	0.9417	0.9899	0.89	0.9373	human_brain_rep1	6M	Bambu	ReduceAnno20	human
0.9828	0.7938	0.8782	0.9794	0.7854	0.8717	human_brain_rep1	6M	Bambu	ReduceAnno40	human
0.9014	0.593	0.7154	0.8921	0.5821	0.7046	human_brain_rep1	12M	Bambu	NoAnno	human
1	0.9935	0.9968	1	0.9873	0.9936	human_brain_rep1	12M	Bambu	FullAnno	human
0.9914	0.9023	0.9448	0.9912	0.8961	0.9412	human_brain_rep1	12M	Bambu	ReduceAnno20	human
0.9851	0.7994	0.8826	0.9834	0.7924	0.8776	human_brain_rep1	12M	Bambu	ReduceAnno40	human
0.8963	0.5908	0.7122	0.8877	0.5805	0.702	human_brain_rep1	20M	Bambu	NoAnno	human
0.9996	0.9941	0.9968	0.9996	0.988	0.9937	human_brain_rep1	20M	Bambu	FullAnno	human
0.9903	0.9041	0.9453	0.9902	0.898	0.9418	human_brain_rep1	20M	Bambu	ReduceAnno20	human
0.9841	0.8023	0.884	0.9825	0.7954	0.8791	human_brain_rep1	20M	Bambu	ReduceAnno40	human
0.9134	0.6026	0.7262	0.8975	0.5875	0.7101	human_brain_rep2	3M	Bambu	NoAnno	human
0.9997	0.9909	0.9952	0.9997	0.9848	0.9922	human_brain_rep2	3M	Bambu	FullAnno	human
0.9903	0.9023	0.9442	0.9888	0.895	0.9396	human_brain_rep2	3M	Bambu	ReduceAnno20	human
0.9827	0.7982	0.8809	0.9791	0.7898	0.8743	human_brain_rep2	3M	Bambu	ReduceAnno40	human
0.903	0.6185	0.7342	0.8952	0.6084	0.7245	human_brain_rep2	6M	Bambu	NoAnno	human
0.9995	0.9934	0.9964	0.9995	0.9874	0.9935	human_brain_rep2	6M	Bambu	FullAnno	human
0.9892	0.906	0.9458	0.9891	0.9001	0.9425	human_brain_rep2	6M	Bambu	ReduceAnno20	human
0.9827	0.807	0.8862	0.9811	0.8002	0.8815	human_brain_rep2	6M	Bambu	ReduceAnno40	human
0.8946	0.6196	0.7321	0.8872	0.6097	0.7227	human_brain_rep2	12M	Bambu	NoAnno	human
0.9995	0.9943	0.9969	0.9995	0.9884	0.9939	human_brain_rep2	12M	Bambu	FullAnno	human
0.9894	0.9071	0.9465	0.9893	0.9013	0.9432	human_brain_rep2	12M	Bambu	ReduceAnno20	human
0.9842	0.8054	0.8859	0.9827	0.7988	0.8813	human_brain_rep2	12M	Bambu	ReduceAnno40	human
0.8895	0.6164	0.7282	0.8823	0.6066	0.7189	human_brain_rep2	20M	Bambu	NoAnno	human
0.9995	0.9947	0.9971	0.9995	0.9889	0.9942	human_brain_rep2	20M	Bambu	FullAnno	human
0.9884	0.9081	0.9465	0.9883	0.9023	0.9433	human_brain_rep2	20M	Bambu	ReduceAnno20	human
0.983	0.8085	0.8873	0.9815	0.8019	0.8827	human_brain_rep2	20M	Bambu	ReduceAnno40	human
0.8955	0.4458	0.5953	0.8797	0.4341	0.5813	human_heart_rep1	3M	Bambu	NoAnno	human
1	0.9778	0.9888	1	0.971	0.9853	human_heart_rep1	3M	Bambu	FullAnno	human
0.992	0.8641	0.9236	0.9914	0.8571	0.9194	human_heart_rep1	3M	Bambu	ReduceAnno20	human
0.986	0.7433	0.8476	0.9833	0.7355	0.8415	human_heart_rep1	3M	Bambu	ReduceAnno40	human
0.898	0.5687	0.6964	0.8821	0.5537	0.6803	human_heart_rep1	6M	Bambu	NoAnno	human
1	0.9893	0.9946	1	0.9825	0.9912	human_heart_rep1	6M	Bambu	FullAnno	human
0.9914	0.8941	0.9403	0.9904	0.8866	0.9356	human_heart_rep1	6M	Bambu	ReduceAnno20	human
0.982	0.7962	0.8794	0.9786	0.7874	0.8726	human_heart_rep1	6M	Bambu	ReduceAnno40	human
0.8899	0.5865	0.707	0.8802	0.575	0.6956	human_heart_rep1	12M	Bambu	NoAnno	human
1	0.9927	0.9963	1	0.9858	0.9929	human_heart_rep1	12M	Bambu	FullAnno	human
0.9909	0.8995	0.943	0.9908	0.8928	0.9392	human_heart_rep1	12M	Bambu	ReduceAnno20	human
0.9828	0.8012	0.8828	0.981	0.7935	0.8773	human_heart_rep1	12M	Bambu	ReduceAnno40	human
0.8846	0.5859	0.7049	0.8753	0.5746	0.6937	human_heart_rep1	20M	Bambu	NoAnno	human
1	0.993	0.9965	1	0.9862	0.993	human_heart_rep1	20M	Bambu	FullAnno	human
0.9907	0.9006	0.9435	0.9906	0.8937	0.9397	human_heart_rep1	20M	Bambu	ReduceAnno20	human
0.9827	0.804	0.8844	0.9808	0.7963	0.879	human_heart_rep1	20M	Bambu	ReduceAnno40	human
0.905	0.5946	0.7177	0.8896	0.5798	0.702	human_heart_rep2	3M	Bambu	NoAnno	human
1	0.9908	0.9954	1	0.9846	0.9923	human_heart_rep2	3M	Bambu	FullAnno	human
0.9893	0.9009	0.943	0.9882	0.8938	0.9387	human_heart_rep2	3M	Bambu	ReduceAnno20	human
0.9821	0.7986	0.8809	0.9785	0.7902	0.8743	human_heart_rep2	3M	Bambu	ReduceAnno40	human
0.894	0.6074	0.7234	0.8858	0.597	0.7133	human_heart_rep2	6M	Bambu	NoAnno	human
0.9995	0.993	0.9962	0.9995	0.9867	0.9931	human_heart_rep2	6M	Bambu	FullAnno	human
0.9891	0.9035	0.9444	0.9889	0.8972	0.9409	human_heart_rep2	6M	Bambu	ReduceAnno20	human
0.9808	0.8079	0.886	0.979	0.8007	0.8809	human_heart_rep2	6M	Bambu	ReduceAnno40	human
0.886	0.6068	0.7203	0.878	0.5966	0.7105	human_heart_rep2	12M	Bambu	NoAnno	human
1	0.9939	0.9969	1	0.9877	0.9938	human_heart_rep2	12M	Bambu	FullAnno	human
0.99	0.9035	0.9448	0.9899	0.8973	0.9413	human_heart_rep2	12M	Bambu	ReduceAnno20	human
0.9836	0.8047	0.8852	0.9819	0.7977	0.8803	human_heart_rep2	12M	Bambu	ReduceAnno40	human
0.8795	0.6063	0.7178	0.8717	0.5962	0.7081	human_heart_rep2	20M	Bambu	NoAnno	human
1	0.9943	0.9972	1	0.9882	0.9941	human_heart_rep2	20M	Bambu	FullAnno	human
0.9897	0.9043	0.9451	0.9896	0.8982	0.9417	human_heart_rep2	20M	Bambu	ReduceAnno20	human
0.9835	0.8064	0.8862	0.9818	0.7993	0.8812	human_heart_rep2	20M	Bambu	ReduceAnno40	human
0.9098	0.7109	0.7982	0.8985	0.6979	0.7856	mouse_brain_rep1	3M	Bambu	NoAnno	mouse
0.9997	0.9922	0.9959	0.9997	0.988	0.9938	mouse_brain_rep1	3M	Bambu	FullAnno	mouse
0.9883	0.9019	0.9431	0.9876	0.8969	0.9401	mouse_brain_rep1	3M	Bambu	ReduceAnno20	mouse
0.979	0.8257	0.8959	0.9765	0.8192	0.8909	mouse_brain_rep1	3M	Bambu	ReduceAnno40	mouse
0.9002	0.7324	0.8077	0.8943	0.7233	0.7997	mouse_brain_rep1	6M	Bambu	NoAnno	mouse
0.9994	0.9943	0.9969	0.9994	0.9901	0.9947	mouse_brain_rep1	6M	Bambu	FullAnno	mouse
0.988	0.9063	0.9454	0.9879	0.9018	0.9429	mouse_brain_rep1	6M	Bambu	ReduceAnno20	mouse
0.9817	0.8291	0.899	0.9805	0.8237	0.8953	mouse_brain_rep1	6M	Bambu	ReduceAnno40	mouse
0.8934	0.7333	0.8055	0.8881	0.7246	0.798	mouse_brain_rep1	12M	Bambu	NoAnno	mouse
0.9995	0.9949	0.9972	0.9995	0.9907	0.9951	mouse_brain_rep1	12M	Bambu	FullAnno	mouse
0.9874	0.9074	0.9457	0.9874	0.9029	0.9433	mouse_brain_rep1	12M	Bambu	ReduceAnno20	mouse
0.9819	0.8295	0.8993	0.9809	0.8243	0.8958	mouse_brain_rep1	12M	Bambu	ReduceAnno40	mouse
0.8896	0.7327	0.8036	0.8846	0.7243	0.7964	mouse_brain_rep1	20M	Bambu	NoAnno	mouse
0.9994	0.9951	0.9973	0.9994	0.9911	0.9953	mouse_brain_rep1	20M	Bambu	FullAnno	mouse
0.988	0.907	0.9458	0.988	0.9027	0.9434	mouse_brain_rep1	20M	Bambu	ReduceAnno20	mouse
0.9821	0.8299	0.8996	0.9812	0.8248	0.8962	mouse_brain_rep1	20M	Bambu	ReduceAnno40	mouse
0.9094	0.7162	0.8013	0.8978	0.7025	0.7882	mouse_brain_rep2	3M	Bambu	NoAnno	mouse
0.9994	0.9912	0.9953	0.9994	0.9867	0.993	mouse_brain_rep2	3M	Bambu	FullAnno	mouse
0.9893	0.9009	0.943	0.9885	0.8956	0.9398	mouse_brain_rep2	3M	Bambu	ReduceAnno20	mouse
0.9813	0.8191	0.8929	0.979	0.8127	0.8882	mouse_brain_rep2	3M	Bambu	ReduceAnno40	mouse
0.8994	0.7415	0.8129	0.8937	0.7322	0.8049	mouse_brain_rep2	6M	Bambu	NoAnno	mouse
0.9996	0.9936	0.9966	0.9996	0.9891	0.9943	mouse_brain_rep2	6M	Bambu	FullAnno	mouse
0.9887	0.9053	0.9452	0.9887	0.9007	0.9426	mouse_brain_rep2	6M	Bambu	ReduceAnno20	mouse
0.9822	0.8274	0.8982	0.9811	0.8218	0.8944	mouse_brain_rep2	6M	Bambu	ReduceAnno40	mouse
0.8912	0.7427	0.8102	0.8855	0.7334	0.8023	mouse_brain_rep2	12M	Bambu	NoAnno	mouse
0.9997	0.994	0.9969	0.9997	0.9895	0.9946	mouse_brain_rep2	12M	Bambu	FullAnno	mouse
0.9882	0.9067	0.9457	0.9882	0.9021	0.9432	mouse_brain_rep2	12M	Bambu	ReduceAnno20	mouse
0.982	0.8307	0.9	0.9808	0.8251	0.8962	mouse_brain_rep2	12M	Bambu	ReduceAnno40	mouse
0.8869	0.7429	0.8086	0.8816	0.7338	0.801	mouse_brain_rep2	20M	Bambu	NoAnno	mouse
0.9997	0.9943	0.997	0.9997	0.9899	0.9948	mouse_brain_rep2	20M	Bambu	FullAnno	mouse
0.9891	0.9067	0.9461	0.9891	0.9022	0.9436	mouse_brain_rep2	20M	Bambu	ReduceAnno20	mouse
0.982	0.8315	0.9005	0.9809	0.8261	0.8969	mouse_brain_rep2	20M	Bambu	ReduceAnno40	mouse
0.9069	0.7797	0.8385	0.8997	0.7687	0.8291	mouse_heart_rep1	3M	Bambu	NoAnno	mouse
0.9994	0.993	0.9962	0.9994	0.9887	0.994	mouse_heart_rep1	3M	Bambu	FullAnno	mouse
0.9911	0.9043	0.9457	0.991	0.8997	0.9432	mouse_heart_rep1	3M	Bambu	ReduceAnno20	mouse
0.985	0.8189	0.8943	0.9834	0.813	0.8901	mouse_heart_rep1	3M	Bambu	ReduceAnno40	mouse
0.8969	0.7788	0.8337	0.8909	0.7689	0.8254	mouse_heart_rep1	6M	Bambu	NoAnno	mouse
0.9994	0.9939	0.9967	0.9994	0.9897	0.9945	mouse_heart_rep1	6M	Bambu	FullAnno	mouse
0.9912	0.9046	0.9459	0.9912	0.9	0.9434	mouse_heart_rep1	6M	Bambu	ReduceAnno20	mouse
0.9836	0.8253	0.8975	0.9821	0.8195	0.8935	mouse_heart_rep1	6M	Bambu	ReduceAnno40	mouse
0.8893	0.7838	0.8332	0.8841	0.7744	0.8256	mouse_heart_rep1	12M	Bambu	NoAnno	mouse
0.9993	0.9944	0.9969	0.9993	0.9901	0.9947	mouse_heart_rep1	12M	Bambu	FullAnno	mouse
0.9919	0.9045	0.9462	0.9919	0.9	0.9437	mouse_heart_rep1	12M	Bambu	ReduceAnno20	mouse
0.9856	0.8201	0.8953	0.9845	0.8148	0.8916	mouse_heart_rep1	12M	Bambu	ReduceAnno40	mouse
0.8845	0.782	0.8301	0.879	0.7724	0.8223	mouse_heart_rep1	20M	Bambu	NoAnno	mouse
0.9994	0.9945	0.9969	0.9994	0.9903	0.9948	mouse_heart_rep1	20M	Bambu	FullAnno	mouse
0.9915	0.9059	0.9467	0.9915	0.9014	0.9443	mouse_heart_rep1	20M	Bambu	ReduceAnno20	mouse
0.9859	0.8203	0.8955	0.9846	0.8147	0.8916	mouse_heart_rep1	20M	Bambu	ReduceAnno40	mouse
0.909	0.7722	0.835	0.9007	0.7604	0.8246	mouse_heart_rep2	3M	Bambu	NoAnno	mouse
0.9995	0.993	0.9962	0.9995	0.9886	0.994	mouse_heart_rep2	3M	Bambu	FullAnno	mouse
0.991	0.9036	0.9453	0.9907	0.8986	0.9424	mouse_heart_rep2	3M	Bambu	ReduceAnno20	mouse
0.9843	0.8232	0.8965	0.9826	0.8172	0.8923	mouse_heart_rep2	3M	Bambu	ReduceAnno40	mouse
0.8999	0.7717	0.8309	0.8934	0.7614	0.8221	mouse_heart_rep2	6M	Bambu	NoAnno	mouse
0.9994	0.9938	0.9966	0.9994	0.9893	0.9943	mouse_heart_rep2	6M	Bambu	FullAnno	mouse
0.9885	0.9064	0.9457	0.9883	0.9015	0.9429	mouse_heart_rep2	6M	Bambu	ReduceAnno20	mouse
0.9828	0.8307	0.9003	0.9813	0.8248	0.8962	mouse_heart_rep2	6M	Bambu	ReduceAnno40	mouse
0.892	0.7753	0.8296	0.8862	0.7654	0.8214	mouse_heart_rep2	12M	Bambu	NoAnno	mouse
0.9994	0.9941	0.9968	0.9994	0.9898	0.9946	mouse_heart_rep2	12M	Bambu	FullAnno	mouse
0.9897	0.906	0.946	0.9897	0.9014	0.9435	mouse_heart_rep2	12M	Bambu	ReduceAnno20	mouse
0.9833	0.8247	0.8971	0.9819	0.8189	0.893	mouse_heart_rep2	12M	Bambu	ReduceAnno40	mouse
0.8879	0.7744	0.8273	0.8822	0.7647	0.8193	mouse_heart_rep2	20M	Bambu	NoAnno	mouse
0.9993	0.9944	0.9968	0.9993	0.9901	0.9947	mouse_heart_rep2	20M	Bambu	FullAnno	mouse
0.9899	0.9068	0.9465	0.9898	0.9021	0.9439	mouse_heart_rep2	20M	Bambu	ReduceAnno20	mouse
0.9844	0.8281	0.8995	0.9832	0.8225	0.8957	mouse_heart_rep2	20M	Bambu	ReduceAnno40	mouse
0.9654	0.5372	0.6902	0.955	0.528	0.68	human_brain_rep1	3M	ISAtools	NoAnno	human
0.9833	0.7743	0.8664	0.9337	0.7307	0.8198	human_brain_rep1	3M	ISAtools	ReduceAnno40	human
0.9616	0.7747	0.8581	0.9497	0.7603	0.8445	human_brain_rep1	6M	ISAtools	NoAnno	human
0.9879	0.8576	0.9182	0.9302	0.8026	0.8617	human_brain_rep1	3M	ISAtools	ReduceAnno20	human
0.9519	0.8294	0.8864	0.9481	0.8213	0.8802	human_brain_rep1	12M	ISAtools	NoAnno	human
0.9445	0.834	0.8858	0.9416	0.8269	0.8805	human_brain_rep1	20M	ISAtools	NoAnno	human
0.9912	0.94	0.9649	0.9273	0.8739	0.8998	human_brain_rep1	3M	ISAtools	FullAnno	human
0.9764	0.8861	0.929	0.9578	0.8642	0.9086	human_brain_rep1	6M	ISAtools	ReduceAnno40	human
0.9818	0.9305	0.9554	0.9612	0.9059	0.9327	human_brain_rep1	6M	ISAtools	ReduceAnno20	human
0.9762	0.9123	0.9432	0.9696	0.9017	0.9344	human_brain_rep1	12M	ISAtools	ReduceAnno40	human
0.975	0.914	0.9435	0.9691	0.9046	0.9358	human_brain_rep1	20M	ISAtools	ReduceAnno40	human
0.9815	0.9487	0.9648	0.9737	0.937	0.955	human_brain_rep1	12M	ISAtools	ReduceAnno20	human
0.9861	0.9748	0.9804	0.9643	0.9482	0.9562	human_brain_rep1	6M	ISAtools	FullAnno	human
0.9807	0.9501	0.9652	0.9737	0.9398	0.9565	human_brain_rep1	20M	ISAtools	ReduceAnno20	human
0.9863	0.9862	0.9862	0.9781	0.9738	0.9759	human_brain_rep1	12M	ISAtools	FullAnno	human
0.9855	0.9876	0.9865	0.9781	0.9767	0.9774	human_brain_rep1	20M	ISAtools	FullAnno	human
0.9657	0.7686	0.856	0.9526	0.7533	0.8413	human_brain_rep2	3M	ISAtools	NoAnno	human
0.9581	0.8228	0.8853	0.9535	0.814	0.8783	human_brain_rep2	6M	ISAtools	NoAnno	human
0.9376	0.835	0.8833	0.9354	0.8289	0.8789	human_brain_rep2	20M	ISAtools	NoAnno	human
0.9472	0.8332	0.8865	0.944	0.8259	0.881	human_brain_rep2	12M	ISAtools	NoAnno	human
0.9799	0.8807	0.9276	0.9606	0.8581	0.9065	human_brain_rep2	3M	ISAtools	ReduceAnno40	human
0.9846	0.9264	0.9546	0.9637	0.9013	0.9314	human_brain_rep2	3M	ISAtools	ReduceAnno20	human
0.9789	0.9074	0.9418	0.972	0.8963	0.9326	human_brain_rep2	6M	ISAtools	ReduceAnno40	human
0.9773	0.9122	0.9436	0.9717	0.903	0.9361	human_brain_rep2	12M	ISAtools	ReduceAnno40	human
0.9753	0.9127	0.9429	0.9705	0.9049	0.9366	human_brain_rep2	20M	ISAtools	ReduceAnno40	human
0.984	0.9451	0.9642	0.9762	0.9329	0.9541	human_brain_rep2	6M	ISAtools	ReduceAnno20	human
0.9888	0.9726	0.9807	0.9669	0.9454	0.9561	human_brain_rep2	3M	ISAtools	FullAnno	human
0.9828	0.9487	0.9655	0.9761	0.9385	0.9569	human_brain_rep2	12M	ISAtools	ReduceAnno20	human
0.9809	0.949	0.9647	0.975	0.9404	0.9574	human_brain_rep2	20M	ISAtools	ReduceAnno20	human
0.9887	0.9839	0.9863	0.9806	0.9711	0.9758	human_brain_rep2	6M	ISAtools	FullAnno	human
0.9876	0.9866	0.9871	0.9806	0.9758	0.9782	human_brain_rep2	12M	ISAtools	FullAnno	human
0.9856	0.9871	0.9864	0.9795	0.978	0.9788	human_brain_rep2	20M	ISAtools	FullAnno	human
0.9624	0.5028	0.6605	0.9548	0.4955	0.6524	human_heart_rep1	3M	ISAtools	NoAnno	human
0.982	0.7648	0.8599	0.9353	0.7233	0.8157	human_heart_rep1	3M	ISAtools	ReduceAnno40	human
0.9562	0.784	0.8616	0.946	0.7703	0.8491	human_heart_rep1	6M	ISAtools	NoAnno	human
0.986	0.8578	0.9174	0.932	0.8052	0.864	human_heart_rep1	3M	ISAtools	ReduceAnno20	human
0.9465	0.8323	0.8857	0.9427	0.8237	0.8792	human_heart_rep1	12M	ISAtools	NoAnno	human
0.9466	0.8366	0.8882	0.9437	0.8291	0.8827	human_heart_rep1	20M	ISAtools	NoAnno	human
0.9893	0.9452	0.9667	0.9295	0.8818	0.905	human_heart_rep1	3M	ISAtools	FullAnno	human
0.9727	0.8913	0.9302	0.956	0.8704	0.9112	human_heart_rep1	6M	ISAtools	ReduceAnno40	human
0.9774	0.9329	0.9547	0.9585	0.9093	0.9333	human_heart_rep1	6M	ISAtools	ReduceAnno20	human
0.9721	0.9158	0.9431	0.965	0.9041	0.9335	human_heart_rep1	12M	ISAtools	ReduceAnno40	human
0.9712	0.9179	0.9438	0.965	0.9077	0.9355	human_heart_rep1	20M	ISAtools	ReduceAnno40	human
0.9772	0.9505	0.9636	0.9686	0.9373	0.9527	human_heart_rep1	12M	ISAtools	ReduceAnno20	human
0.976	0.9519	0.9638	0.9684	0.9405	0.9542	human_heart_rep1	20M	ISAtools	ReduceAnno20	human
0.9819	0.9763	0.9791	0.9615	0.9502	0.9558	human_heart_rep1	6M	ISAtools	FullAnno	human
0.9823	0.987	0.9846	0.9732	0.9732	0.9732	human_heart_rep1	12M	ISAtools	FullAnno	human
0.9814	0.988	0.9847	0.9734	0.976	0.9747	human_heart_rep1	20M	ISAtools	FullAnno	human
0.9607	0.7734	0.857	0.9491	0.7591	0.8436	human_heart_rep2	3M	ISAtools	NoAnno	human
0.9522	0.8211	0.8818	0.9483	0.8128	0.8754	human_heart_rep2	6M	ISAtools	NoAnno	human
0.9417	0.83	0.8823	0.9388	0.8229	0.8771	human_heart_rep2	12M	ISAtools	NoAnno	human
0.9458	0.8293	0.8837	0.9435	0.8234	0.8794	human_heart_rep2	20M	ISAtools	NoAnno	human
0.9764	0.886	0.929	0.9584	0.8644	0.909	human_heart_rep2	3M	ISAtools	ReduceAnno40	human
0.975	0.9082	0.9404	0.9682	0.8969	0.9312	human_heart_rep2	6M	ISAtools	ReduceAnno40	human
0.9722	0.913	0.9417	0.9662	0.9032	0.9336	human_heart_rep2	12M	ISAtools	ReduceAnno40	human
0.9817	0.931	0.9557	0.9621	0.9068	0.9337	human_heart_rep2	3M	ISAtools	ReduceAnno20	human
0.975	0.9125	0.9427	0.9696	0.9045	0.9359	human_heart_rep2	20M	ISAtools	ReduceAnno40	human
0.9805	0.9465	0.9632	0.9725	0.9336	0.9527	human_heart_rep2	6M	ISAtools	ReduceAnno20	human
0.9776	0.9499	0.9636	0.9706	0.939	0.9546	human_heart_rep2	12M	ISAtools	ReduceAnno20	human
0.9857	0.9745	0.9801	0.9652	0.9484	0.9568	human_heart_rep2	3M	ISAtools	FullAnno	human
0.9803	0.9499	0.9648	0.9739	0.9409	0.9571	human_heart_rep2	20M	ISAtools	ReduceAnno20	human
0.985	0.9841	0.9845	0.9769	0.9708	0.9738	human_heart_rep2	6M	ISAtools	FullAnno	human
0.9824	0.9863	0.9843	0.9752	0.975	0.9751	human_heart_rep2	12M	ISAtools	FullAnno	human
0.9844	0.9867	0.9856	0.9778	0.9775	0.9776	human_heart_rep2	20M	ISAtools	FullAnno	human
0.9542	0.7838	0.8606	0.9444	0.7717	0.8494	mouse_brain_rep1	3M	ISAtools	NoAnno	mouse
0.9434	0.8289	0.8825	0.9396	0.8216	0.8766	mouse_brain_rep1	6M	ISAtools	NoAnno	mouse
0.934	0.834	0.8812	0.9319	0.8285	0.8772	mouse_brain_rep1	20M	ISAtools	NoAnno	mouse
0.94	0.8331	0.8833	0.9373	0.8268	0.8786	mouse_brain_rep1	12M	ISAtools	NoAnno	mouse
0.9691	0.8793	0.922	0.9543	0.8616	0.9056	mouse_brain_rep1	3M	ISAtools	ReduceAnno40	mouse
0.97	0.9011	0.9343	0.9643	0.8918	0.9266	mouse_brain_rep1	6M	ISAtools	ReduceAnno40	mouse
0.9667	0.9031	0.9338	0.9626	0.8962	0.9282	mouse_brain_rep1	20M	ISAtools	ReduceAnno40	mouse
0.9702	0.9026	0.9352	0.9656	0.8949	0.9289	mouse_brain_rep1	12M	ISAtools	ReduceAnno40	mouse
0.9745	0.9263	0.9498	0.9584	0.9065	0.9318	mouse_brain_rep1	3M	ISAtools	ReduceAnno20	mouse
0.9757	0.9418	0.9584	0.9698	0.9319	0.9505	mouse_brain_rep1	6M	ISAtools	ReduceAnno20	mouse
0.9729	0.9435	0.958	0.9682	0.9362	0.9519	mouse_brain_rep1	20M	ISAtools	ReduceAnno20	mouse
0.9758	0.9432	0.9592	0.9707	0.9349	0.9525	mouse_brain_rep1	12M	ISAtools	ReduceAnno20	mouse
0.98	0.9741	0.977	0.9631	0.9524	0.9577	mouse_brain_rep1	3M	ISAtools	FullAnno	mouse
0.9814	0.9842	0.9828	0.9755	0.9739	0.9747	mouse_brain_rep1	6M	ISAtools	FullAnno	mouse
0.9787	0.9855	0.9821	0.9743	0.978	0.9761	mouse_brain_rep1	20M	ISAtools	FullAnno	mouse
0.9815	0.9851	0.9833	0.9766	0.9765	0.9766	mouse_brain_rep1	12M	ISAtools	FullAnno	mouse
0.9556	0.7967	0.8689	0.9458	0.7841	0.8574	mouse_brain_rep2	3M	ISAtools	NoAnno	mouse
0.9433	0.841	0.8892	0.9398	0.8335	0.8834	mouse_brain_rep2	6M	ISAtools	NoAnno	mouse
0.9383	0.8456	0.8896	0.9356	0.8392	0.8848	mouse_brain_rep2	12M	ISAtools	NoAnno	mouse
0.9395	0.8459	0.8903	0.9374	0.8402	0.8861	mouse_brain_rep2	20M	ISAtools	NoAnno	mouse
0.97	0.8876	0.927	0.955	0.8691	0.91	mouse_brain_rep2	3M	ISAtools	ReduceAnno40	mouse
0.9704	0.9085	0.9384	0.9652	0.8992	0.931	mouse_brain_rep2	6M	ISAtools	ReduceAnno40	mouse
0.969	0.9101	0.9386	0.9647	0.9024	0.9325	mouse_brain_rep2	12M	ISAtools	ReduceAnno40	mouse
0.9758	0.9291	0.9519	0.9589	0.9082	0.9329	mouse_brain_rep2	3M	ISAtools	ReduceAnno20	mouse
0.9712	0.9096	0.9394	0.9671	0.9026	0.9337	mouse_brain_rep2	20M	ISAtools	ReduceAnno40	mouse
0.9763	0.9451	0.9605	0.9703	0.935	0.9523	mouse_brain_rep2	6M	ISAtools	ReduceAnno20	mouse
0.9758	0.9467	0.961	0.9707	0.9383	0.9542	mouse_brain_rep2	12M	ISAtools	ReduceAnno20	mouse
0.9774	0.9467	0.9618	0.9725	0.939	0.9554	mouse_brain_rep2	20M	ISAtools	ReduceAnno20	mouse
0.9804	0.975	0.9776	0.9628	0.9522	0.9575	mouse_brain_rep2	3M	ISAtools	FullAnno	mouse
0.9814	0.9852	0.9833	0.9753	0.9744	0.9748	mouse_brain_rep2	6M	ISAtools	FullAnno	mouse
0.9808	0.9868	0.9838	0.9756	0.9777	0.9767	mouse_brain_rep2	12M	ISAtools	FullAnno	mouse
0.982	0.9868	0.9844	0.9771	0.9786	0.9778	mouse_brain_rep2	20M	ISAtools	FullAnno	mouse
0.9566	0.8474	0.8987	0.952	0.8387	0.8917	mouse_heart_rep1	3M	ISAtools	NoAnno	mouse
0.947	0.862	0.9025	0.9441	0.855	0.8973	mouse_heart_rep1	6M	ISAtools	NoAnno	mouse
0.9475	0.867	0.9054	0.9454	0.8613	0.9014	mouse_heart_rep1	20M	ISAtools	NoAnno	mouse
0.9505	0.8667	0.9067	0.9482	0.8605	0.9022	mouse_heart_rep1	12M	ISAtools	NoAnno	mouse
0.9738	0.9095	0.9406	0.9665	0.898	0.931	mouse_heart_rep1	3M	ISAtools	ReduceAnno40	mouse
0.9719	0.9163	0.9433	0.9662	0.9068	0.9356	mouse_heart_rep1	6M	ISAtools	ReduceAnno40	mouse
0.9739	0.9188	0.9456	0.969	0.9106	0.9389	mouse_heart_rep1	12M	ISAtools	ReduceAnno40	mouse
0.9735	0.9183	0.9451	0.9691	0.911	0.9392	mouse_heart_rep1	20M	ISAtools	ReduceAnno40	mouse
0.9796	0.9444	0.9617	0.9708	0.9312	0.9506	mouse_heart_rep1	3M	ISAtools	ReduceAnno20	mouse
0.9779	0.9494	0.9634	0.9709	0.9385	0.9544	mouse_heart_rep1	6M	ISAtools	ReduceAnno20	mouse
0.9793	0.9514	0.9652	0.973	0.9417	0.9571	mouse_heart_rep1	12M	ISAtools	ReduceAnno20	mouse
0.9791	0.9513	0.965	0.9733	0.9427	0.9577	mouse_heart_rep1	20M	ISAtools	ReduceAnno20	mouse
0.9851	0.9829	0.984	0.9762	0.9692	0.9727	mouse_heart_rep1	3M	ISAtools	FullAnno	mouse
0.983	0.986	0.9845	0.9761	0.9749	0.9755	mouse_heart_rep1	6M	ISAtools	FullAnno	mouse
0.9846	0.9877	0.9861	0.9784	0.9778	0.9781	mouse_heart_rep1	12M	ISAtools	FullAnno	mouse
0.984	0.9876	0.9858	0.9783	0.9789	0.9786	mouse_heart_rep1	20M	ISAtools	FullAnno	mouse
0.9573	0.8466	0.8986	0.9516	0.8368	0.8905	mouse_heart_rep2	3M	ISAtools	NoAnno	mouse
0.9488	0.8604	0.9025	0.9458	0.8532	0.8971	mouse_heart_rep2	6M	ISAtools	NoAnno	mouse
0.9462	0.865	0.9038	0.9435	0.8585	0.899	mouse_heart_rep2	12M	ISAtools	NoAnno	mouse
0.9491	0.8656	0.9054	0.947	0.8598	0.9013	mouse_heart_rep2	20M	ISAtools	NoAnno	mouse
0.9745	0.9081	0.9401	0.9662	0.8955	0.9295	mouse_heart_rep2	3M	ISAtools	ReduceAnno40	mouse
0.9724	0.9157	0.9432	0.9667	0.906	0.9354	mouse_heart_rep2	6M	ISAtools	ReduceAnno40	mouse
0.9735	0.9167	0.9442	0.9684	0.9082	0.9374	mouse_heart_rep2	12M	ISAtools	ReduceAnno40	mouse
0.9747	0.9166	0.9447	0.9701	0.9091	0.9386	mouse_heart_rep2	20M	ISAtools	ReduceAnno40	mouse
0.979	0.944	0.9612	0.9694	0.93	0.9493	mouse_heart_rep2	3M	ISAtools	ReduceAnno20	mouse
0.977	0.9492	0.9629	0.9704	0.9385	0.9542	mouse_heart_rep2	6M	ISAtools	ReduceAnno20	mouse
0.9787	0.9502	0.9643	0.9728	0.941	0.9566	mouse_heart_rep2	12M	ISAtools	ReduceAnno20	mouse
0.9794	0.9503	0.9646	0.9737	0.942	0.9576	mouse_heart_rep2	20M	ISAtools	ReduceAnno20	mouse
0.9845	0.9832	0.9839	0.9744	0.9683	0.9713	mouse_heart_rep2	3M	ISAtools	FullAnno	mouse
0.9826	0.9867	0.9847	0.9758	0.9754	0.9756	mouse_heart_rep2	6M	ISAtools	FullAnno	mouse
0.9843	0.9875	0.9859	0.9782	0.9777	0.978	mouse_heart_rep2	12M	ISAtools	FullAnno	mouse
0.9841	0.9875	0.9858	0.9784	0.9789	0.9787	mouse_heart_rep2	20M	ISAtools	FullAnno	mouse
0.9731	0.4681	0.6321	0.9244	0.4411	0.5972	human_brain_rep1	3M	IsoQuant	NoAnno	human
0.9988	0.9254	0.9607	0.9988	0.9194	0.9574	human_brain_rep1	3M	IsoQuant	FullAnno	human
0.9964	0.8391	0.911	0.9923	0.8299	0.9039	human_brain_rep1	3M	IsoQuant	ReduceAnno20	human
0.9923	0.7436	0.8501	0.9801	0.7292	0.8362	human_brain_rep1	3M	IsoQuant	ReduceAnno40	human
0.9708	0.6323	0.7658	0.9221	0.5957	0.7238	human_brain_rep1	6M	IsoQuant	NoAnno	human
0.9985	0.9647	0.9813	0.9985	0.9586	0.9781	human_brain_rep1	6M	IsoQuant	FullAnno	human
0.9949	0.9048	0.9477	0.9895	0.8936	0.9391	human_brain_rep1	6M	IsoQuant	ReduceAnno20	human
0.9898	0.8269	0.901	0.9754	0.809	0.8845	human_brain_rep1	6M	IsoQuant	ReduceAnno40	human
0.9726	0.6619	0.7877	0.9244	0.6241	0.7452	human_brain_rep1	12M	IsoQuant	NoAnno	human
0.9984	0.9766	0.9874	0.9984	0.9704	0.9842	human_brain_rep1	12M	IsoQuant	FullAnno	human
0.9951	0.9207	0.9565	0.9895	0.9092	0.9477	human_brain_rep1	12M	IsoQuant	ReduceAnno20	human
0.9903	0.8449	0.9118	0.9749	0.8258	0.8942	human_brain_rep1	12M	IsoQuant	ReduceAnno40	human
0.9719	0.6603	0.7863	0.919	0.6194	0.74	human_brain_rep1	20M	IsoQuant	NoAnno	human
0.9981	0.9775	0.9877	0.9981	0.9713	0.9845	human_brain_rep1	20M	IsoQuant	FullAnno	human
0.9948	0.9206	0.9563	0.9884	0.9084	0.9467	human_brain_rep1	20M	IsoQuant	ReduceAnno20	human
0.9898	0.8441	0.9112	0.9725	0.8234	0.8917	human_brain_rep1	20M	IsoQuant	ReduceAnno40	human
0.9701	0.6603	0.7858	0.9227	0.6232	0.744	human_brain_rep2	3M	IsoQuant	NoAnno	human
0.9981	0.9639	0.9807	0.9981	0.9577	0.9775	human_brain_rep2	3M	IsoQuant	FullAnno	human
0.9945	0.9086	0.9496	0.988	0.8965	0.94	human_brain_rep2	3M	IsoQuant	ReduceAnno20	human
0.9893	0.8376	0.9072	0.9744	0.8191	0.8901	human_brain_rep2	3M	IsoQuant	ReduceAnno40	human
0.9719	0.6814	0.8011	0.9273	0.6451	0.7609	human_brain_rep2	6M	IsoQuant	NoAnno	human
0.9979	0.9759	0.9868	0.9979	0.9698	0.9837	human_brain_rep2	6M	IsoQuant	FullAnno	human
0.9946	0.9225	0.9572	0.989	0.9111	0.9484	human_brain_rep2	6M	IsoQuant	ReduceAnno20	human
0.9895	0.8527	0.916	0.9747	0.8341	0.8989	human_brain_rep2	6M	IsoQuant	ReduceAnno40	human
0.9714	0.683	0.8021	0.9217	0.643	0.7575	human_brain_rep2	12M	IsoQuant	NoAnno	human
0.9977	0.9781	0.9878	0.9977	0.9719	0.9847	human_brain_rep2	12M	IsoQuant	FullAnno	human
0.9943	0.9245	0.9581	0.988	0.9124	0.9487	human_brain_rep2	12M	IsoQuant	ReduceAnno20	human
0.9891	0.854	0.9166	0.9727	0.8339	0.898	human_brain_rep2	12M	IsoQuant	ReduceAnno40	human
0.9709	0.6803	0.8	0.9161	0.637	0.7515	human_brain_rep2	20M	IsoQuant	NoAnno	human
0.9977	0.9785	0.988	0.9977	0.9725	0.9849	human_brain_rep2	20M	IsoQuant	FullAnno	human
0.9942	0.9243	0.9579	0.9872	0.9115	0.9478	human_brain_rep2	20M	IsoQuant	ReduceAnno20	human
0.9889	0.8531	0.916	0.9706	0.8315	0.8957	human_brain_rep2	20M	IsoQuant	ReduceAnno40	human
0.975	0.4745	0.6383	0.9219	0.4446	0.5999	human_heart_rep1	3M	IsoQuant	NoAnno	human
0.999	0.9236	0.9598	0.999	0.9167	0.9561	human_heart_rep1	3M	IsoQuant	FullAnno	human
0.9965	0.8411	0.9122	0.9919	0.8305	0.904	human_heart_rep1	3M	IsoQuant	ReduceAnno20	human
0.9927	0.7472	0.8526	0.9795	0.7311	0.8373	human_heart_rep1	3M	IsoQuant	ReduceAnno40	human
0.9713	0.617	0.7546	0.9144	0.5758	0.7066	human_heart_rep1	6M	IsoQuant	NoAnno	human
0.9986	0.9617	0.9798	0.9986	0.9547	0.9761	human_heart_rep1	6M	IsoQuant	FullAnno	human
0.9951	0.9018	0.9462	0.9887	0.889	0.9362	human_heart_rep1	6M	IsoQuant	ReduceAnno20	human
0.9906	0.8216	0.8982	0.9736	0.801	0.8789	human_heart_rep1	6M	IsoQuant	ReduceAnno40	human
0.9719	0.6397	0.7716	0.915	0.597	0.7226	human_heart_rep1	12M	IsoQuant	NoAnno	human
0.9984	0.9741	0.9861	0.9984	0.967	0.9825	human_heart_rep1	12M	IsoQuant	FullAnno	human
0.9949	0.9164	0.954	0.9886	0.9035	0.9441	human_heart_rep1	12M	IsoQuant	ReduceAnno20	human
0.9903	0.8383	0.908	0.9727	0.8168	0.888	human_heart_rep1	12M	IsoQuant	ReduceAnno40	human
0.9715	0.6369	0.7694	0.9107	0.5918	0.7174	human_heart_rep1	20M	IsoQuant	NoAnno	human
0.9983	0.975	0.9865	0.9983	0.968	0.9829	human_heart_rep1	20M	IsoQuant	FullAnno	human
0.9948	0.9167	0.9541	0.9878	0.9032	0.9436	human_heart_rep1	20M	IsoQuant	ReduceAnno20	human
0.9903	0.838	0.9078	0.9712	0.8153	0.8864	human_heart_rep1	20M	IsoQuant	ReduceAnno40	human
0.9709	0.6392	0.7709	0.92	0.6009	0.727	human_heart_rep2	3M	IsoQuant	NoAnno	human
0.9986	0.9619	0.9799	0.9986	0.9555	0.9766	human_heart_rep2	3M	IsoQuant	FullAnno	human
0.9948	0.9064	0.9485	0.9887	0.8943	0.9391	human_heart_rep2	3M	IsoQuant	ReduceAnno20	human
0.9896	0.8296	0.9025	0.9738	0.8103	0.8845	human_heart_rep2	3M	IsoQuant	ReduceAnno40	human
0.9726	0.6554	0.7831	0.9223	0.6166	0.7391	human_heart_rep2	6M	IsoQuant	NoAnno	human
0.9983	0.973	0.9854	0.9983	0.9666	0.9821	human_heart_rep2	6M	IsoQuant	FullAnno	human
0.9945	0.9186	0.9551	0.9884	0.9065	0.9457	human_heart_rep2	6M	IsoQuant	ReduceAnno20	human
0.9895	0.842	0.9098	0.9733	0.822	0.8913	human_heart_rep2	6M	IsoQuant	ReduceAnno40	human
0.9725	0.6531	0.7814	0.918	0.6117	0.7342	human_heart_rep2	12M	IsoQuant	NoAnno	human
0.9981	0.9748	0.9863	0.9981	0.9684	0.983	human_heart_rep2	12M	IsoQuant	FullAnno	human
0.9944	0.9194	0.9554	0.9874	0.9064	0.9452	human_heart_rep2	12M	IsoQuant	ReduceAnno20	human
0.9894	0.8411	0.9093	0.9714	0.8197	0.8891	human_heart_rep2	12M	IsoQuant	ReduceAnno40	human
0.9719	0.6505	0.7793	0.9122	0.6057	0.728	human_heart_rep2	20M	IsoQuant	NoAnno	human
0.9978	0.9758	0.9867	0.9978	0.9694	0.9834	human_heart_rep2	20M	IsoQuant	FullAnno	human
0.9942	0.9198	0.9556	0.9868	0.9065	0.945	human_heart_rep2	20M	IsoQuant	ReduceAnno20	human
0.9891	0.8411	0.9091	0.9698	0.8187	0.8879	human_heart_rep2	20M	IsoQuant	ReduceAnno40	human
0.9732	0.7234	0.8299	0.9364	0.692	0.7958	mouse_brain_rep1	3M	IsoQuant	NoAnno	mouse
0.9978	0.9678	0.9826	0.9978	0.9627	0.9799	mouse_brain_rep1	3M	IsoQuant	FullAnno	mouse
0.9937	0.9168	0.9537	0.9887	0.9071	0.9462	mouse_brain_rep1	3M	IsoQuant	ReduceAnno20	mouse
0.9883	0.8542	0.9163	0.975	0.8378	0.9012	mouse_brain_rep1	3M	IsoQuant	ReduceAnno40	mouse
0.9752	0.7502	0.848	0.9383	0.7176	0.8132	mouse_brain_rep1	6M	IsoQuant	NoAnno	mouse
0.9978	0.9782	0.9879	0.9978	0.973	0.9852	mouse_brain_rep1	6M	IsoQuant	FullAnno	mouse
0.9936	0.9292	0.9603	0.988	0.9188	0.9521	mouse_brain_rep1	6M	IsoQuant	ReduceAnno20	mouse
0.9886	0.8699	0.9255	0.9738	0.852	0.9088	mouse_brain_rep1	6M	IsoQuant	ReduceAnno40	mouse
0.9748	0.7492	0.8472	0.9306	0.711	0.8061	mouse_brain_rep1	12M	IsoQuant	NoAnno	mouse
0.9976	0.9788	0.9881	0.9976	0.9735	0.9854	mouse_brain_rep1	12M	IsoQuant	FullAnno	mouse
0.9935	0.9297	0.9605	0.9866	0.9182	0.9512	mouse_brain_rep1	12M	IsoQuant	ReduceAnno20	mouse
0.9882	0.8698	0.9252	0.97	0.8488	0.9054	mouse_brain_rep1	12M	IsoQuant	ReduceAnno40	mouse
0.9731	0.7464	0.8448	0.9258	0.7061	0.8012	mouse_brain_rep1	20M	IsoQuant	NoAnno	mouse
0.997	0.9795	0.9882	0.997	0.9743	0.9855	mouse_brain_rep1	20M	IsoQuant	FullAnno	mouse
0.9928	0.9291	0.9599	0.9853	0.917	0.95	mouse_brain_rep1	20M	IsoQuant	ReduceAnno20	mouse
0.9873	0.8687	0.9242	0.9681	0.847	0.9035	mouse_brain_rep1	20M	IsoQuant	ReduceAnno40	mouse
0.9723	0.729	0.8332	0.9349	0.6966	0.7983	mouse_brain_rep2	3M	IsoQuant	NoAnno	mouse
0.998	0.9679	0.9827	0.998	0.9624	0.9799	mouse_brain_rep2	3M	IsoQuant	FullAnno	mouse
0.9941	0.915	0.9529	0.9885	0.9045	0.9446	mouse_brain_rep2	3M	IsoQuant	ReduceAnno20	mouse
0.989	0.8566	0.918	0.9751	0.8394	0.9022	mouse_brain_rep2	3M	IsoQuant	ReduceAnno40	mouse
0.9752	0.7576	0.8527	0.9373	0.7236	0.8167	mouse_brain_rep2	6M	IsoQuant	NoAnno	mouse
0.9978	0.9785	0.9881	0.9978	0.9729	0.9852	mouse_brain_rep2	6M	IsoQuant	FullAnno	mouse
0.9944	0.9283	0.9602	0.9887	0.9176	0.9518	mouse_brain_rep2	6M	IsoQuant	ReduceAnno20	mouse
0.989	0.8727	0.9272	0.9735	0.8537	0.9096	mouse_brain_rep2	6M	IsoQuant	ReduceAnno40	mouse
0.9743	0.757	0.852	0.9307	0.7187	0.8111	mouse_brain_rep2	12M	IsoQuant	NoAnno	mouse
0.9977	0.9797	0.9886	0.9977	0.9741	0.9858	mouse_brain_rep2	12M	IsoQuant	FullAnno	mouse
0.9942	0.9293	0.9607	0.9875	0.9176	0.9513	mouse_brain_rep2	12M	IsoQuant	ReduceAnno20	mouse
0.9887	0.8729	0.9272	0.9702	0.8514	0.9069	mouse_brain_rep2	12M	IsoQuant	ReduceAnno40	mouse
0.9738	0.7556	0.8509	0.9275	0.7153	0.8077	mouse_brain_rep2	20M	IsoQuant	NoAnno	mouse
0.9975	0.9801	0.9887	0.9975	0.9745	0.9858	mouse_brain_rep2	20M	IsoQuant	FullAnno	mouse
0.994	0.9291	0.9605	0.9868	0.9169	0.9505	mouse_brain_rep2	20M	IsoQuant	ReduceAnno20	mouse
0.9884	0.8723	0.9267	0.9686	0.8495	0.9052	mouse_brain_rep2	20M	IsoQuant	ReduceAnno40	mouse
0.9772	0.7817	0.8686	0.9465	0.7526	0.8384	mouse_heart_rep1	3M	IsoQuant	NoAnno	mouse
0.9985	0.9758	0.987	0.9985	0.9706	0.9844	mouse_heart_rep1	3M	IsoQuant	FullAnno	mouse
0.9948	0.9297	0.9611	0.9894	0.9195	0.9532	mouse_heart_rep1	3M	IsoQuant	ReduceAnno20	mouse
0.9901	0.8814	0.9326	0.9772	0.865	0.9177	mouse_heart_rep1	3M	IsoQuant	ReduceAnno40	mouse
0.9766	0.7859	0.871	0.9414	0.753	0.8367	mouse_heart_rep1	6M	IsoQuant	NoAnno	mouse
0.9982	0.9791	0.9886	0.9982	0.9739	0.9859	mouse_heart_rep1	6M	IsoQuant	FullAnno	mouse
0.9943	0.9326	0.9624	0.9883	0.9217	0.9538	mouse_heart_rep1	6M	IsoQuant	ReduceAnno20	mouse
0.9896	0.8835	0.9336	0.974	0.8646	0.916	mouse_heart_rep1	6M	IsoQuant	ReduceAnno40	mouse
0.9763	0.7882	0.8723	0.9359	0.751	0.8333	mouse_heart_rep1	12M	IsoQuant	NoAnno	mouse
0.9979	0.9802	0.9889	0.9979	0.975	0.9863	mouse_heart_rep1	12M	IsoQuant	FullAnno	mouse
0.9939	0.9344	0.9632	0.9867	0.9223	0.9534	mouse_heart_rep1	12M	IsoQuant	ReduceAnno20	mouse
0.9896	0.8857	0.9348	0.9719	0.865	0.9153	mouse_heart_rep1	12M	IsoQuant	ReduceAnno40	mouse
0.975	0.7861	0.8704	0.931	0.7461	0.8284	mouse_heart_rep1	20M	IsoQuant	NoAnno	mouse
0.9979	0.9805	0.9891	0.9979	0.9753	0.9865	mouse_heart_rep1	20M	IsoQuant	FullAnno	mouse
0.9941	0.9346	0.9634	0.9862	0.922	0.953	mouse_heart_rep1	20M	IsoQuant	ReduceAnno20	mouse
0.9892	0.8847	0.934	0.9691	0.8618	0.9123	mouse_heart_rep1	20M	IsoQuant	ReduceAnno40	mouse
0.9773	0.7813	0.8684	0.9452	0.751	0.837	mouse_heart_rep2	3M	IsoQuant	NoAnno	mouse
0.9981	0.976	0.9869	0.9981	0.9707	0.9842	mouse_heart_rep2	3M	IsoQuant	FullAnno	mouse
0.9944	0.9297	0.961	0.9892	0.9196	0.9532	mouse_heart_rep2	3M	IsoQuant	ReduceAnno20	mouse
0.9899	0.881	0.9323	0.9762	0.8636	0.9165	mouse_heart_rep2	3M	IsoQuant	ReduceAnno40	mouse
0.9772	0.7821	0.8688	0.9417	0.7491	0.8344	mouse_heart_rep2	6M	IsoQuant	NoAnno	mouse
0.9978	0.9793	0.9884	0.9978	0.9739	0.9857	mouse_heart_rep2	6M	IsoQuant	FullAnno	mouse
0.9941	0.9314	0.9617	0.9884	0.9208	0.9534	mouse_heart_rep2	6M	IsoQuant	ReduceAnno20	mouse
0.9895	0.8823	0.9329	0.9739	0.8631	0.9151	mouse_heart_rep2	6M	IsoQuant	ReduceAnno40	mouse
0.9767	0.7866	0.8714	0.9358	0.7491	0.8321	mouse_heart_rep2	12M	IsoQuant	NoAnno	mouse
0.9979	0.9804	0.989	0.9979	0.9751	0.9864	mouse_heart_rep2	12M	IsoQuant	FullAnno	mouse
0.994	0.9338	0.963	0.9864	0.9214	0.9528	mouse_heart_rep2	12M	IsoQuant	ReduceAnno20	mouse
0.9896	0.8839	0.9338	0.9715	0.8626	0.9138	mouse_heart_rep2	12M	IsoQuant	ReduceAnno40	mouse
0.9768	0.7833	0.8694	0.9325	0.7433	0.8272	mouse_heart_rep2	20M	IsoQuant	NoAnno	mouse
0.9979	0.9806	0.9892	0.9979	0.9754	0.9865	mouse_heart_rep2	20M	IsoQuant	FullAnno	mouse
0.994	0.9331	0.9626	0.9864	0.9207	0.9524	mouse_heart_rep2	20M	IsoQuant	ReduceAnno20	mouse
0.9898	0.8831	0.9334	0.9698	0.8602	0.9117	mouse_heart_rep2	20M	IsoQuant	ReduceAnno40	mouse
0.9792	0.4038	0.5718	0.9699	0.3989	0.5653	human_brain_rep1	3M	Mandalorion	NoAnno	human
0.9766	0.4307	0.5978	0.967	0.4254	0.5908	human_brain_rep1	3M	Mandalorion	FullAnno	human
0.9766	0.4263	0.5935	0.9673	0.4211	0.5867	human_brain_rep1	3M	Mandalorion	ReduceAnno20	human
0.9771	0.4201	0.5876	0.9675	0.4149	0.5808	human_brain_rep1	3M	Mandalorion	ReduceAnno40	human
0.9759	0.5132	0.6727	0.9677	0.5074	0.6658	human_brain_rep1	6M	Mandalorion	NoAnno	human
0.9746	0.5528	0.7055	0.9661	0.5465	0.6981	human_brain_rep1	6M	Mandalorion	FullAnno	human
0.9743	0.5471	0.7007	0.9657	0.5408	0.6933	human_brain_rep1	6M	Mandalorion	ReduceAnno20	human
0.9746	0.5378	0.6931	0.9661	0.5316	0.6858	human_brain_rep1	6M	Mandalorion	ReduceAnno40	human
0.9733	0.712	0.8224	0.9655	0.7035	0.8139	human_brain_rep1	12M	Mandalorion	NoAnno	human
0.9733	0.7784	0.865	0.9651	0.7688	0.8559	human_brain_rep1	12M	Mandalorion	FullAnno	human
0.9733	0.7679	0.8585	0.9652	0.7585	0.8495	human_brain_rep1	12M	Mandalorion	ReduceAnno20	human
0.9732	0.7534	0.8493	0.965	0.7442	0.8403	human_brain_rep1	12M	Mandalorion	ReduceAnno40	human
0.9694	0.7362	0.8368	0.964	0.7305	0.8312	human_brain_rep1	20M	Mandalorion	NoAnno	human
0.9709	0.8046	0.88	0.9652	0.7984	0.8739	human_brain_rep1	20M	Mandalorion	FullAnno	human
0.9705	0.7936	0.8732	0.9649	0.7874	0.8672	human_brain_rep1	20M	Mandalorion	ReduceAnno20	human
0.9699	0.7787	0.8639	0.9644	0.7726	0.8579	human_brain_rep1	20M	Mandalorion	ReduceAnno40	human
0.9774	0.4963	0.6583	0.9689	0.4912	0.6519	human_brain_rep2	3M	Mandalorion	NoAnno	human
0.9744	0.5318	0.6881	0.9656	0.5263	0.6812	human_brain_rep2	3M	Mandalorion	FullAnno	human
0.9745	0.527	0.684	0.9657	0.5214	0.6772	human_brain_rep2	3M	Mandalorion	ReduceAnno20	human
0.9752	0.5186	0.6772	0.9663	0.5132	0.6703	human_brain_rep2	3M	Mandalorion	ReduceAnno40	human
0.9748	0.6907	0.8085	0.967	0.6833	0.8008	human_brain_rep2	6M	Mandalorion	NoAnno	human
0.9731	0.7524	0.8486	0.9651	0.744	0.8403	human_brain_rep2	6M	Mandalorion	FullAnno	human
0.9733	0.7431	0.8428	0.9652	0.7348	0.8344	human_brain_rep2	6M	Mandalorion	ReduceAnno20	human
0.9736	0.7292	0.8338	0.9655	0.7211	0.8256	human_brain_rep2	6M	Mandalorion	ReduceAnno40	human
0.9701	0.7646	0.8552	0.9646	0.7587	0.8493	human_brain_rep2	12M	Mandalorion	NoAnno	human
0.9701	0.8319	0.8957	0.9644	0.8253	0.8894	human_brain_rep2	12M	Mandalorion	FullAnno	human
0.9702	0.8214	0.8896	0.9645	0.8148	0.8834	human_brain_rep2	12M	Mandalorion	ReduceAnno20	human
0.97	0.8066	0.8808	0.9642	0.8002	0.8746	human_brain_rep2	12M	Mandalorion	ReduceAnno40	human
0.9696	0.7655	0.8555	0.9673	0.7605	0.8515	human_brain_rep2	20M	Mandalorion	NoAnno	human
0.9716	0.8346	0.8979	0.9693	0.829	0.8937	human_brain_rep2	20M	Mandalorion	FullAnno	human
0.9716	0.824	0.8917	0.9691	0.8185	0.8875	human_brain_rep2	20M	Mandalorion	ReduceAnno20	human
0.9707	0.8082	0.8821	0.9685	0.8029	0.8779	human_brain_rep2	20M	Mandalorion	ReduceAnno40	human
0.9801	0.4012	0.5694	0.9711	0.3965	0.5631	human_heart_rep1	3M	Mandalorion	NoAnno	human
0.9787	0.4285	0.596	0.9699	0.4234	0.5895	human_heart_rep1	3M	Mandalorion	FullAnno	human
0.979	0.425	0.5927	0.97	0.4199	0.5861	human_heart_rep1	3M	Mandalorion	ReduceAnno20	human
0.9787	0.4187	0.5865	0.9698	0.4138	0.5801	human_heart_rep1	3M	Mandalorion	ReduceAnno40	human
0.9761	0.5195	0.6781	0.9683	0.5137	0.6713	human_heart_rep1	6M	Mandalorion	NoAnno	human
0.976	0.5607	0.7122	0.9681	0.5545	0.7051	human_heart_rep1	6M	Mandalorion	FullAnno	human
0.9761	0.555	0.7076	0.9682	0.5489	0.7006	human_heart_rep1	6M	Mandalorion	ReduceAnno20	human
0.9757	0.5458	0.7	0.9676	0.5398	0.693	human_heart_rep1	6M	Mandalorion	ReduceAnno40	human
0.9734	0.6898	0.8075	0.9657	0.6813	0.799	human_heart_rep1	12M	Mandalorion	NoAnno	human
0.9749	0.7569	0.8521	0.9667	0.7471	0.8429	human_heart_rep1	12M	Mandalorion	FullAnno	human
0.9745	0.746	0.8451	0.9664	0.7365	0.836	human_heart_rep1	12M	Mandalorion	ReduceAnno20	human
0.9742	0.7319	0.8358	0.9662	0.7227	0.8269	human_heart_rep1	12M	Mandalorion	ReduceAnno40	human
0.9696	0.7116	0.8208	0.9642	0.706	0.8151	human_heart_rep1	20M	Mandalorion	NoAnno	human
0.9712	0.7797	0.865	0.9662	0.7736	0.8592	human_heart_rep1	20M	Mandalorion	FullAnno	human
0.9714	0.7692	0.8586	0.9663	0.7631	0.8528	human_heart_rep1	20M	Mandalorion	ReduceAnno20	human
0.9708	0.7544	0.849	0.9656	0.7485	0.8433	human_heart_rep1	20M	Mandalorion	ReduceAnno40	human
0.9772	0.488	0.651	0.9696	0.4828	0.6446	human_heart_rep2	3M	Mandalorion	NoAnno	human
0.9757	0.5235	0.6814	0.9675	0.5176	0.6744	human_heart_rep2	3M	Mandalorion	FullAnno	human
0.9757	0.5186	0.6773	0.9675	0.5129	0.6704	human_heart_rep2	3M	Mandalorion	ReduceAnno20	human
0.9761	0.5106	0.6705	0.9679	0.505	0.6637	human_heart_rep2	3M	Mandalorion	ReduceAnno40	human
0.9749	0.6684	0.7931	0.9678	0.6617	0.786	human_heart_rep2	6M	Mandalorion	NoAnno	human
0.9744	0.7279	0.8333	0.9671	0.7204	0.8257	human_heart_rep2	6M	Mandalorion	FullAnno	human
0.9743	0.7195	0.8277	0.9671	0.7122	0.8203	human_heart_rep2	6M	Mandalorion	ReduceAnno20	human
0.9742	0.7059	0.8187	0.9672	0.6989	0.8114	human_heart_rep2	6M	Mandalorion	ReduceAnno40	human
0.9705	0.7316	0.8343	0.9647	0.7252	0.8279	human_heart_rep2	12M	Mandalorion	NoAnno	human
0.9719	0.7967	0.8756	0.9659	0.7894	0.8688	human_heart_rep2	12M	Mandalorion	FullAnno	human
0.9717	0.7869	0.8696	0.9657	0.7798	0.8628	human_heart_rep2	12M	Mandalorion	ReduceAnno20	human
0.9716	0.7722	0.8605	0.9657	0.7652	0.8538	human_heart_rep2	12M	Mandalorion	ReduceAnno40	human
0.9676	0.7375	0.837	0.9646	0.7326	0.8328	human_heart_rep2	20M	Mandalorion	NoAnno	human
0.9712	0.803	0.8791	0.9681	0.7977	0.8747	human_heart_rep2	20M	Mandalorion	FullAnno	human
0.9709	0.7932	0.8731	0.9677	0.7879	0.8686	human_heart_rep2	20M	Mandalorion	ReduceAnno20	human
0.9703	0.7788	0.8641	0.9673	0.7737	0.8597	human_heart_rep2	20M	Mandalorion	ReduceAnno40	human
0.9735	0.5962	0.7395	0.9666	0.5903	0.733	mouse_brain_rep1	3M	Mandalorion	NoAnno	mouse
0.9712	0.6315	0.7654	0.9638	0.6252	0.7584	mouse_brain_rep1	3M	Mandalorion	FullAnno	mouse
0.9711	0.6261	0.7613	0.9637	0.6198	0.7544	mouse_brain_rep1	3M	Mandalorion	ReduceAnno20	mouse
0.9721	0.6173	0.7551	0.9649	0.6111	0.7483	mouse_brain_rep1	3M	Mandalorion	ReduceAnno40	mouse
0.9713	0.8447	0.9036	0.9641	0.8354	0.8951	mouse_brain_rep1	6M	Mandalorion	FullAnno	mouse
0.9712	0.8351	0.898	0.964	0.8259	0.8896	mouse_brain_rep1	6M	Mandalorion	ReduceAnno20	mouse
0.9711	0.8202	0.8893	0.9637	0.811	0.8808	mouse_brain_rep1	6M	Mandalorion	ReduceAnno40	mouse
0.9708	0.7834	0.8671	0.9637	0.7749	0.8591	mouse_brain_rep1	6M	Mandalorion	NoAnno	mouse
0.9674	0.8107	0.8821	0.9634	0.8053	0.8773	mouse_brain_rep1	12M	Mandalorion	NoAnno	mouse
0.9698	0.8728	0.9188	0.9657	0.867	0.9137	mouse_brain_rep1	12M	Mandalorion	FullAnno	mouse
0.9697	0.8635	0.9135	0.9653	0.8575	0.9082	mouse_brain_rep1	12M	Mandalorion	ReduceAnno20	mouse
0.9689	0.848	0.9044	0.9647	0.8423	0.8994	mouse_brain_rep1	12M	Mandalorion	ReduceAnno40	mouse
0.9655	0.8123	0.8823	0.9635	0.8072	0.8784	mouse_brain_rep1	20M	Mandalorion	NoAnno	mouse
0.9705	0.874	0.9197	0.9684	0.8686	0.9158	mouse_brain_rep1	20M	Mandalorion	FullAnno	mouse
0.9702	0.8642	0.9141	0.968	0.8587	0.9101	mouse_brain_rep1	20M	Mandalorion	ReduceAnno20	mouse
0.969	0.8486	0.9048	0.9669	0.8433	0.9009	mouse_brain_rep1	20M	Mandalorion	ReduceAnno40	mouse
0.9761	0.5987	0.7422	0.9696	0.5929	0.7358	mouse_brain_rep2	3M	Mandalorion	NoAnno	mouse
0.9746	0.6328	0.7674	0.9678	0.6266	0.7607	mouse_brain_rep2	3M	Mandalorion	FullAnno	mouse
0.9746	0.6276	0.7635	0.9677	0.6214	0.7568	mouse_brain_rep2	3M	Mandalorion	ReduceAnno20	mouse
0.9754	0.6191	0.7574	0.9683	0.6129	0.7506	mouse_brain_rep2	3M	Mandalorion	ReduceAnno40	mouse
0.9723	0.7871	0.87	0.9652	0.7783	0.8617	mouse_brain_rep2	6M	Mandalorion	NoAnno	mouse
0.9725	0.8475	0.9057	0.965	0.8379	0.897	mouse_brain_rep2	6M	Mandalorion	FullAnno	mouse
0.9725	0.838	0.9003	0.965	0.8285	0.8915	mouse_brain_rep2	6M	Mandalorion	ReduceAnno20	mouse
0.9727	0.8242	0.8923	0.965	0.8146	0.8835	mouse_brain_rep2	6M	Mandalorion	ReduceAnno40	mouse
0.9683	0.8159	0.8856	0.9646	0.8105	0.8808	mouse_brain_rep2	12M	Mandalorion	NoAnno	mouse
0.9717	0.8773	0.9221	0.9678	0.8713	0.917	mouse_brain_rep2	12M	Mandalorion	FullAnno	mouse
0.9717	0.8674	0.9166	0.9676	0.8613	0.9114	mouse_brain_rep2	12M	Mandalorion	ReduceAnno20	mouse
0.9712	0.8534	0.9085	0.9672	0.8477	0.9035	mouse_brain_rep2	12M	Mandalorion	ReduceAnno40	mouse
0.9668	0.8176	0.886	0.9646	0.8122	0.8819	mouse_brain_rep2	20M	Mandalorion	NoAnno	mouse
0.9721	0.8792	0.9233	0.9697	0.8733	0.919	mouse_brain_rep2	20M	Mandalorion	FullAnno	mouse
0.9718	0.8689	0.9175	0.9695	0.8632	0.9133	mouse_brain_rep2	20M	Mandalorion	ReduceAnno20	mouse
0.9709	0.8551	0.9093	0.9686	0.8495	0.9051	mouse_brain_rep2	20M	Mandalorion	ReduceAnno40	mouse
0.9787	0.6808	0.803	0.9728	0.675	0.797	mouse_heart_rep1	3M	Mandalorion	NoAnno	mouse
0.9775	0.7213	0.8301	0.9707	0.7146	0.8232	mouse_heart_rep1	3M	Mandalorion	FullAnno	mouse
0.9775	0.714	0.8253	0.9707	0.7075	0.8185	mouse_heart_rep1	3M	Mandalorion	ReduceAnno20	mouse
0.978	0.7034	0.8183	0.9714	0.697	0.8117	mouse_heart_rep1	3M	Mandalorion	ReduceAnno40	mouse
0.9732	0.8063	0.8819	0.9656	0.797	0.8732	mouse_heart_rep1	6M	Mandalorion	NoAnno	mouse
0.9743	0.8619	0.9147	0.9665	0.852	0.9056	mouse_heart_rep1	6M	Mandalorion	FullAnno	mouse
0.9742	0.8517	0.9089	0.9664	0.8418	0.8998	mouse_heart_rep1	6M	Mandalorion	ReduceAnno20	mouse
0.9738	0.8371	0.9003	0.9661	0.8275	0.8914	mouse_heart_rep1	6M	Mandalorion	ReduceAnno40	mouse
0.97	0.8375	0.8989	0.9664	0.8321	0.8942	mouse_heart_rep1	12M	Mandalorion	NoAnno	mouse
0.9732	0.8945	0.9322	0.9698	0.8888	0.9276	mouse_heart_rep1	12M	Mandalorion	FullAnno	mouse
0.9727	0.8836	0.926	0.9693	0.8779	0.9214	mouse_heart_rep1	12M	Mandalorion	ReduceAnno20	mouse
0.9715	0.8684	0.9171	0.9678	0.8628	0.9123	mouse_heart_rep1	12M	Mandalorion	ReduceAnno40	mouse
0.9667	0.8387	0.8982	0.9649	0.8334	0.8944	mouse_heart_rep1	20M	Mandalorion	NoAnno	mouse
0.9725	0.8951	0.9322	0.9707	0.8894	0.9283	mouse_heart_rep1	20M	Mandalorion	FullAnno	mouse
0.9727	0.8845	0.9265	0.9708	0.8789	0.9226	mouse_heart_rep1	20M	Mandalorion	ReduceAnno20	mouse
0.9704	0.8693	0.9171	0.9686	0.8639	0.9132	mouse_heart_rep1	20M	Mandalorion	ReduceAnno40	mouse
0.9786	0.6773	0.8006	0.9713	0.6704	0.7932	mouse_heart_rep2	3M	Mandalorion	NoAnno	mouse
0.9774	0.7179	0.8278	0.9699	0.7102	0.82	mouse_heart_rep2	3M	Mandalorion	FullAnno	mouse
0.9777	0.7116	0.8237	0.9703	0.704	0.816	mouse_heart_rep2	3M	Mandalorion	ReduceAnno20	mouse
0.9779	0.7004	0.8162	0.9704	0.693	0.8086	mouse_heart_rep2	3M	Mandalorion	ReduceAnno40	mouse
0.9748	0.8029	0.8805	0.9668	0.7933	0.8715	mouse_heart_rep2	6M	Mandalorion	NoAnno	mouse
0.9754	0.8584	0.9132	0.9671	0.8481	0.9037	mouse_heart_rep2	6M	Mandalorion	FullAnno	mouse
0.9761	0.8492	0.9082	0.9676	0.8388	0.8986	mouse_heart_rep2	6M	Mandalorion	ReduceAnno20	mouse
0.9757	0.8345	0.8996	0.9672	0.8242	0.89	mouse_heart_rep2	6M	Mandalorion	ReduceAnno40	mouse
0.9702	0.8361	0.8982	0.9667	0.8306	0.8935	mouse_heart_rep2	12M	Mandalorion	NoAnno	mouse
0.9739	0.8915	0.9309	0.9703	0.8855	0.9259	mouse_heart_rep2	12M	Mandalorion	FullAnno	mouse
0.9743	0.8826	0.9262	0.9707	0.8766	0.9213	mouse_heart_rep2	12M	Mandalorion	ReduceAnno20	mouse
0.9731	0.8674	0.9172	0.9692	0.8614	0.9121	mouse_heart_rep2	12M	Mandalorion	ReduceAnno40	mouse
0.9674	0.8376	0.8978	0.9656	0.8322	0.894	mouse_heart_rep2	20M	Mandalorion	NoAnno	mouse
0.9729	0.893	0.9313	0.9711	0.8873	0.9273	mouse_heart_rep2	20M	Mandalorion	FullAnno	mouse
0.9729	0.8837	0.9262	0.9708	0.8778	0.922	mouse_heart_rep2	20M	Mandalorion	ReduceAnno20	mouse
0.9715	0.8689	0.9173	0.9696	0.8631	0.9133	mouse_heart_rep2	20M	Mandalorion	ReduceAnno40	mouse

## Sheet: figure2B figure3C
SSC_support	TssTes_support	sample	depth	tools	anno	source
0.959517	0.903311	human_brain_rep1	3M	Bambu	FullAnno	human
0.960333	0.908138	human_heart_rep1	3M	Bambu	FullAnno	human
0.961816	0.910609	human_brain_rep1	3M	Bambu	ReduceAnno20	human
0.962817	0.915768	human_heart_rep1	3M	Bambu	ReduceAnno20	human
0.96615	0.924198	human_heart_rep1	3M	Bambu	ReduceAnno40	human
0.966565	0.921707	human_brain_rep1	3M	Bambu	ReduceAnno40	human
0.976543	0.965289	mouse_brain_rep1	3M	Bambu	FullAnno	mouse
0.977055	0.963893	human_heart_rep2	3M	Bambu	FullAnno	human
0.977168	0.962659	human_brain_rep2	3M	Bambu	FullAnno	human
0.97753	0.96571	mouse_brain_rep2	3M	Bambu	FullAnno	mouse
0.978139	0.968078	mouse_brain_rep1	3M	Bambu	ReduceAnno20	mouse
0.978324	0.966616	human_heart_rep2	3M	Bambu	ReduceAnno20	human
0.978436	0.967903	mouse_brain_rep2	3M	Bambu	ReduceAnno20	mouse
0.978882	0.966358	human_brain_rep2	3M	Bambu	ReduceAnno20	human
0.979207	0.965467	human_brain_rep1	6M	Bambu	FullAnno	human
0.97936	0.967347	human_heart_rep1	6M	Bambu	FullAnno	human
0.979878	0.942758	human_brain_rep1	3M	IsoQuant	ReduceAnno40	human
0.979936	0.946185	human_brain_rep1	3M	IsoQuant	ReduceAnno20	human
0.980727	0.946636	human_brain_rep1	3M	IsoQuant	FullAnno	human
0.98073	0.970204	human_heart_rep1	6M	Bambu	ReduceAnno20	human
0.980839	0.96834	human_brain_rep1	6M	Bambu	ReduceAnno20	human
0.980974	0.94543	human_heart_rep1	3M	IsoQuant	ReduceAnno40	human
0.981353	0.971056	human_heart_rep2	3M	Bambu	ReduceAnno40	human
0.98152	0.970476	human_brain_rep2	3M	Bambu	ReduceAnno40	human
0.981541	0.951124	human_heart_rep1	3M	IsoQuant	ReduceAnno20	human
0.982258	0.951959	human_heart_rep1	3M	IsoQuant	FullAnno	human
0.982413	0.974166	mouse_brain_rep1	3M	Bambu	ReduceAnno40	mouse
0.982448	0.972854	mouse_brain_rep2	3M	Bambu	ReduceAnno40	mouse
0.982888	0.973607	human_heart_rep1	6M	Bambu	ReduceAnno40	human
0.983117	0.979947	mouse_heart_rep1	3M	Bambu	FullAnno	mouse
0.98316	0.982698	mouse_brain_rep1	6M	Bambu	FullAnno	mouse
0.983327	0.972392	human_brain_rep1	6M	Bambu	ReduceAnno40	human
0.983472	0.97982	mouse_heart_rep2	3M	Bambu	FullAnno	mouse
0.983653	0.983376	mouse_brain_rep1	12M	Bambu	FullAnno	mouse
0.983819	0.983337	mouse_brain_rep2	6M	Bambu	FullAnno	mouse
0.98384	0.982925	human_heart_rep2	6M	Bambu	FullAnno	human
0.983845	0.983522	mouse_brain_rep1	20M	Bambu	FullAnno	mouse
0.984119	0.983643	mouse_brain_rep1	6M	Bambu	ReduceAnno20	mouse
0.984136	0.981188	mouse_heart_rep1	3M	Bambu	ReduceAnno20	mouse
0.984328	0.983388	human_brain_rep2	6M	Bambu	FullAnno	human
0.984425	0.983957	mouse_brain_rep2	6M	Bambu	ReduceAnno20	mouse
0.984444	0.981228	mouse_heart_rep2	3M	Bambu	ReduceAnno20	mouse
0.984649	0.984348	mouse_brain_rep1	12M	Bambu	ReduceAnno20	mouse
0.984667	0.984101	mouse_heart_rep1	6M	Bambu	FullAnno	mouse
0.984752	0.983867	human_heart_rep2	6M	Bambu	ReduceAnno20	human
0.984811	0.984409	mouse_brain_rep1	20M	Bambu	ReduceAnno20	mouse
0.98497	0.984691	mouse_brain_rep2	20M	Bambu	FullAnno	mouse
0.984974	0.966556	human_brain_rep2	3M	IsoQuant	ReduceAnno40	human
0.985027	0.937764	human_heart_rep1	6M	IsoQuant	NoAnno	human
0.985104	0.932019	human_heart_rep1	12M	IsoQuant	NoAnno	human
0.98514	0.984862	mouse_brain_rep2	12M	Bambu	FullAnno	mouse
0.985272	0.973787	mouse_brain_rep2	3M	IsoQuant	ReduceAnno20	mouse
0.985283	0.97474	mouse_brain_rep1	3M	IsoQuant	ReduceAnno20	mouse
0.985304	0.985117	human_heart_rep2	12M	Bambu	FullAnno	human
0.985353	0.949288	human_brain_rep2	3M	IsoQuant	NoAnno	human
0.985366	0.982648	mouse_heart_rep1	3M	Bambu	ReduceAnno40	mouse
0.985382	0.968817	mouse_brain_rep1	3M	IsoQuant	ReduceAnno40	mouse
0.985396	0.967316	mouse_brain_rep2	3M	IsoQuant	ReduceAnno40	mouse
0.985419	0.984493	human_brain_rep2	6M	Bambu	ReduceAnno20	human
0.985448	0.984866	mouse_heart_rep1	6M	Bambu	ReduceAnno20	mouse
0.985529	0.947217	human_brain_rep1	6M	IsoQuant	NoAnno	human
0.985531	0.944619	human_brain_rep2	6M	IsoQuant	NoAnno	human
0.985624	0.928519	human_heart_rep1	20M	IsoQuant	NoAnno	human
0.98565	0.985515	human_heart_rep2	20M	Bambu	FullAnno	human
0.985668	0.985392	mouse_brain_rep2	12M	Bambu	ReduceAnno20	mouse
0.985673	0.944409	human_heart_rep2	3M	IsoQuant	NoAnno	human
0.985675	0.966683	human_heart_rep2	3M	IsoQuant	ReduceAnno40	human
0.985675	0.985276	mouse_heart_rep1	12M	Bambu	FullAnno	mouse
0.985684	0.985271	mouse_brain_rep2	20M	Bambu	ReduceAnno20	mouse
0.985702	0.966144	human_heart_rep1	6M	IsoQuant	ReduceAnno40	human
0.985844	0.985644	mouse_heart_rep1	20M	Bambu	FullAnno	mouse
0.985851	0.940829	human_brain_rep1	12M	IsoQuant	NoAnno	human
0.985853	0.93868	human_heart_rep2	6M	IsoQuant	NoAnno	human
0.98586	0.98566	human_brain_rep2	12M	Bambu	FullAnno	human
0.985916	0.985308	mouse_heart_rep2	6M	Bambu	FullAnno	mouse
0.985924	0.967918	human_brain_rep1	6M	IsoQuant	ReduceAnno40	human
0.985938	0.985754	human_heart_rep2	12M	Bambu	ReduceAnno20	human
0.986051	0.939994	human_brain_rep2	12M	IsoQuant	NoAnno	human
0.986062	0.985661	human_brain_rep1	12M	Bambu	FullAnno	human
0.98608	0.985942	human_brain_rep2	20M	Bambu	FullAnno	human
0.98613	0.985642	human_heart_rep1	12M	Bambu	FullAnno	human
0.98618	0.985892	mouse_heart_rep2	12M	Bambu	FullAnno	mouse
0.986194	0.986012	mouse_heart_rep1	20M	Bambu	ReduceAnno20	mouse
0.986234	0.946165	human_brain_rep1	3M	IsoQuant	NoAnno	human
0.986307	0.935028	human_heart_rep2	12M	IsoQuant	NoAnno	human
0.986312	0.985985	mouse_heart_rep1	12M	Bambu	ReduceAnno20	mouse
0.986324	0.986232	human_heart_rep2	20M	Bambu	ReduceAnno20	human
0.986365	0.974041	human_brain_rep2	3M	IsoQuant	ReduceAnno20	human
0.986434	0.974719	human_heart_rep2	3M	IsoQuant	ReduceAnno20	human
0.986441	0.986281	mouse_heart_rep2	20M	Bambu	FullAnno	mouse
0.986527	0.986214	mouse_heart_rep2	12M	Bambu	ReduceAnno20	mouse
0.986532	0.985859	mouse_heart_rep1	6M	Bambu	ReduceAnno40	mouse
0.986548	0.985992	mouse_heart_rep2	6M	Bambu	ReduceAnno20	mouse
0.986572	0.937005	human_brain_rep1	20M	IsoQuant	NoAnno	human
0.986745	0.986571	mouse_heart_rep2	20M	Bambu	ReduceAnno20	mouse
0.986782	0.986619	human_brain_rep2	12M	Bambu	ReduceAnno20	human
0.986813	0.986656	human_heart_rep1	20M	Bambu	FullAnno	human
0.986815	0.986444	human_brain_rep1	12M	Bambu	ReduceAnno20	human
0.986838	0.9864	human_heart_rep1	12M	Bambu	ReduceAnno20	human
0.986852	0.98661	human_brain_rep1	20M	Bambu	FullAnno	human
0.986879	0.983789	mouse_heart_rep2	3M	Bambu	ReduceAnno40	mouse
0.986911	0.979088	mouse_brain_rep2	3M	IsoQuant	FullAnno	mouse
0.986969	0.986192	human_heart_rep2	6M	Bambu	ReduceAnno40	human
0.987004	0.941359	human_heart_rep1	3M	IsoQuant	NoAnno	human
0.987013	0.986823	human_brain_rep2	20M	Bambu	ReduceAnno20	human
0.987014	0.970286	human_heart_rep1	12M	IsoQuant	ReduceAnno40	human
0.98711	0.971761	mouse_heart_rep1	6M	IsoQuant	ReduceAnno40	mouse
0.987128	0.975974	human_heart_rep1	6M	IsoQuant	ReduceAnno20	human
0.987166	0.97566	human_brain_rep1	6M	IsoQuant	ReduceAnno20	human
0.987185	0.973585	mouse_heart_rep1	3M	IsoQuant	ReduceAnno40	mouse
0.987224	0.986684	mouse_brain_rep2	6M	Bambu	ReduceAnno40	mouse
0.987232	0.981686	mouse_brain_rep1	6M	IsoQuant	ReduceAnno20	mouse
0.987236	0.971359	human_heart_rep2	6M	IsoQuant	ReduceAnno40	human
0.987312	0.979732	mouse_brain_rep1	3M	IsoQuant	FullAnno	mouse
0.987324	0.973069	human_brain_rep2	6M	IsoQuant	ReduceAnno40	human
0.987377	0.936084	human_brain_rep2	20M	IsoQuant	NoAnno	human
0.987379	0.969438	human_heart_rep1	20M	IsoQuant	ReduceAnno40	human
0.98739	0.986388	human_brain_rep2	6M	Bambu	ReduceAnno40	human
0.987462	0.98731	human_heart_rep1	20M	Bambu	ReduceAnno20	human
0.987497	0.987337	mouse_heart_rep1	20M	Bambu	ReduceAnno40	mouse
0.987503	0.987265	human_brain_rep1	20M	Bambu	ReduceAnno20	human
0.987538	0.987139	mouse_heart_rep1	12M	Bambu	ReduceAnno40	mouse
0.9876	0.970598	human_heart_rep2	12M	IsoQuant	ReduceAnno40	human
0.98762	0.981741	mouse_brain_rep2	6M	IsoQuant	ReduceAnno20	mouse
0.987634	0.97325	mouse_brain_rep1	6M	IsoQuant	ReduceAnno40	mouse
0.987643	0.972305	mouse_brain_rep2	6M	IsoQuant	ReduceAnno40	mouse
0.987651	0.980854	mouse_heart_rep1	3M	IsoQuant	ReduceAnno20	mouse
0.987675	0.978567	human_brain_rep2	3M	IsoQuant	FullAnno	human
0.987681	0.972253	human_brain_rep2	12M	IsoQuant	ReduceAnno40	human
0.987701	0.987183	mouse_brain_rep1	6M	Bambu	ReduceAnno40	mouse
0.987774	0.931258	human_heart_rep2	20M	IsoQuant	NoAnno	human
0.987774	0.97303	human_brain_rep1	12M	IsoQuant	ReduceAnno40	human
0.987798	0.987331	human_heart_rep1	12M	Bambu	ReduceAnno40	human
0.987801	0.981311	mouse_heart_rep1	6M	IsoQuant	ReduceAnno20	mouse
0.987831	0.981205	mouse_brain_rep1	12M	IsoQuant	ReduceAnno20	mouse
0.987857	0.980418	mouse_brain_rep1	20M	IsoQuant	ReduceAnno20	mouse
0.987885	0.971162	mouse_heart_rep1	12M	IsoQuant	ReduceAnno40	mouse
0.987979	0.981081	mouse_heart_rep2	3M	IsoQuant	ReduceAnno20	mouse
0.988062	0.969057	mouse_heart_rep1	20M	IsoQuant	ReduceAnno40	mouse
0.988091	0.970842	human_brain_rep2	20M	IsoQuant	ReduceAnno40	human
0.988095	0.981331	mouse_brain_rep2	12M	IsoQuant	ReduceAnno20	mouse
0.98811	0.970203	mouse_brain_rep2	12M	IsoQuant	ReduceAnno40	mouse
0.988158	0.98787	human_heart_rep2	12M	Bambu	ReduceAnno40	human
0.988163	0.98804	human_heart_rep2	20M	Bambu	ReduceAnno40	human
0.988209	0.987676	mouse_heart_rep2	12M	Bambu	ReduceAnno40	mouse
0.988247	0.987919	mouse_brain_rep2	20M	Bambu	ReduceAnno40	mouse
0.988265	0.973803	mouse_heart_rep2	3M	IsoQuant	ReduceAnno40	mouse
0.98831	0.980923	mouse_brain_rep2	20M	IsoQuant	ReduceAnno20	mouse
0.98832	0.970017	human_heart_rep2	20M	IsoQuant	ReduceAnno40	human
0.988377	0.971869	human_brain_rep1	20M	IsoQuant	ReduceAnno40	human
0.988391	0.969129	mouse_brain_rep2	20M	IsoQuant	ReduceAnno40	mouse
0.988396	0.970793	mouse_brain_rep1	12M	IsoQuant	ReduceAnno40	mouse
0.988417	0.988045	human_brain_rep1	12M	Bambu	ReduceAnno40	human
0.988441	0.988141	mouse_brain_rep1	12M	Bambu	ReduceAnno40	mouse
0.988467	0.986118	human_brain_rep2	3M	Bambu	NoAnno	human
0.988488	0.987734	mouse_heart_rep2	6M	Bambu	ReduceAnno40	mouse
0.988506	0.988308	human_brain_rep2	12M	Bambu	ReduceAnno40	human
0.988518	0.982148	human_heart_rep2	6M	IsoQuant	ReduceAnno20	human
0.988533	0.988204	mouse_brain_rep2	12M	Bambu	ReduceAnno40	mouse
0.988537	0.985719	human_heart_rep1	6M	Bambu	NoAnno	human
0.988558	0.980248	human_heart_rep2	3M	IsoQuant	FullAnno	human
0.988564	0.980323	human_brain_rep1	6M	IsoQuant	FullAnno	human
0.988572	0.98132	mouse_heart_rep1	12M	IsoQuant	ReduceAnno20	mouse
0.988574	0.980933	mouse_heart_rep1	20M	IsoQuant	ReduceAnno20	mouse
0.988587	0.988246	mouse_heart_rep2	20M	Bambu	ReduceAnno40	mouse
0.988625	0.988413	human_brain_rep2	20M	Bambu	ReduceAnno40	human
0.988629	0.969922	mouse_brain_rep1	20M	IsoQuant	ReduceAnno40	mouse
0.988635	0.988145	mouse_brain_rep1	20M	Bambu	ReduceAnno40	mouse
0.988666	0.988476	human_heart_rep1	20M	Bambu	ReduceAnno40	human
0.988711	0.985696	human_brain_rep1	6M	Bambu	NoAnno	human
0.988763	0.958965	mouse_brain_rep2	3M	IsoQuant	NoAnno	mouse
0.988764	0.986612	human_brain_rep2	6M	Bambu	NoAnno	human
0.988801	0.959952	mouse_brain_rep1	3M	IsoQuant	NoAnno	mouse
0.988856	0.988605	human_brain_rep1	20M	Bambu	ReduceAnno40	human
0.988859	0.973564	mouse_heart_rep2	6M	IsoQuant	ReduceAnno40	mouse
0.988876	0.982563	human_heart_rep1	12M	IsoQuant	ReduceAnno20	human
0.988912	0.982201	human_heart_rep2	12M	IsoQuant	ReduceAnno20	human
0.988953	0.981271	mouse_heart_rep2	12M	IsoQuant	ReduceAnno20	mouse
0.988958	0.983096	mouse_heart_rep2	6M	IsoQuant	ReduceAnno20	mouse
0.989022	0.971716	mouse_heart_rep2	12M	IsoQuant	ReduceAnno40	mouse
0.989048	0.981531	mouse_heart_rep2	20M	IsoQuant	ReduceAnno20	mouse
0.989051	0.982365	human_heart_rep1	20M	IsoQuant	ReduceAnno20	human
0.989113	0.987004	mouse_heart_rep1	3M	IsoQuant	FullAnno	mouse
0.989117	0.986646	human_heart_rep1	12M	Bambu	NoAnno	human
0.989127	0.9833	human_brain_rep2	6M	IsoQuant	ReduceAnno20	human
0.989171	0.986762	human_heart_rep2	6M	Bambu	NoAnno	human
0.989187	0.986464	human_heart_rep2	3M	Bambu	NoAnno	human
0.989223	0.982199	human_heart_rep1	6M	IsoQuant	FullAnno	human
0.989327	0.986763	human_heart_rep1	20M	Bambu	NoAnno	human
0.989327	0.988975	mouse_brain_rep1	6M	IsoQuant	FullAnno	mouse
0.989351	0.953332	mouse_brain_rep2	6M	IsoQuant	NoAnno	mouse
0.989376	0.988886	mouse_brain_rep2	6M	IsoQuant	FullAnno	mouse
0.989395	0.982197	human_heart_rep2	20M	IsoQuant	ReduceAnno20	human
0.989422	0.983408	human_brain_rep2	12M	IsoQuant	ReduceAnno20	human
0.989441	0.970398	mouse_heart_rep2	20M	IsoQuant	ReduceAnno40	mouse
0.989458	0.988915	mouse_heart_rep1	6M	IsoQuant	FullAnno	mouse
0.98946	0.98389	human_brain_rep1	12M	IsoQuant	ReduceAnno20	human
0.989518	0.9619	mouse_heart_rep1	3M	IsoQuant	NoAnno	mouse
0.989522	0.985971	human_brain_rep1	3M	Bambu	NoAnno	human
0.989539	0.954319	mouse_brain_rep1	6M	IsoQuant	NoAnno	mouse
0.989619	0.987138	mouse_heart_rep2	3M	IsoQuant	FullAnno	mouse
0.989628	0.987607	human_heart_rep2	12M	Bambu	NoAnno	human
0.989636	0.982883	human_brain_rep2	20M	IsoQuant	ReduceAnno20	human
0.989664	0.956547	mouse_heart_rep1	6M	IsoQuant	NoAnno	mouse
0.98968	0.989492	mouse_brain_rep1	20M	IsoQuant	FullAnno	mouse
0.9897	0.987698	human_brain_rep2	12M	Bambu	NoAnno	human
0.989777	0.989468	mouse_brain_rep2	12M	IsoQuant	FullAnno	mouse
0.989783	0.9895	mouse_brain_rep2	20M	IsoQuant	FullAnno	mouse
0.989805	0.98957	mouse_brain_rep1	12M	IsoQuant	FullAnno	mouse
0.989893	0.98362	human_brain_rep1	20M	IsoQuant	ReduceAnno20	human
0.989934	0.987234	human_brain_rep1	12M	Bambu	NoAnno	human
0.989936	0.98831	mouse_heart_rep1	3M	Bambu	NoAnno	mouse
0.989947	0.989676	mouse_heart_rep1	12M	IsoQuant	FullAnno	mouse
0.98995	0.947468	mouse_brain_rep1	12M	IsoQuant	NoAnno	mouse
0.98995	0.989747	mouse_heart_rep1	20M	IsoQuant	FullAnno	mouse
0.990022	0.956694	mouse_heart_rep2	6M	IsoQuant	NoAnno	mouse
0.990104	0.988144	mouse_brain_rep2	3M	Bambu	NoAnno	mouse
0.990134	0.948294	mouse_brain_rep2	12M	IsoQuant	NoAnno	mouse
0.99017	0.961878	mouse_heart_rep2	3M	IsoQuant	NoAnno	mouse
0.99023	0.987682	human_brain_rep1	20M	Bambu	NoAnno	human
0.990256	0.986671	human_heart_rep1	3M	Bambu	NoAnno	human
0.99032	0.988254	mouse_brain_rep1	3M	Bambu	NoAnno	mouse
0.990439	0.951988	mouse_heart_rep1	12M	IsoQuant	NoAnno	mouse
0.990441	0.951771	mouse_heart_rep2	12M	IsoQuant	NoAnno	mouse
0.990516	0.988622	human_brain_rep2	20M	Bambu	NoAnno	human
0.990534	0.989308	mouse_heart_rep1	6M	Bambu	NoAnno	mouse
0.990545	0.990253	mouse_heart_rep2	12M	IsoQuant	FullAnno	mouse
0.990552	0.988545	human_heart_rep2	20M	Bambu	NoAnno	human
0.990581	0.990451	mouse_heart_rep2	20M	IsoQuant	FullAnno	mouse
0.9906	0.99008	mouse_heart_rep2	6M	IsoQuant	FullAnno	mouse
0.990612	0.989974	human_brain_rep2	6M	IsoQuant	FullAnno	human
0.990676	0.946303	mouse_brain_rep2	20M	IsoQuant	NoAnno	mouse
0.990756	0.949036	mouse_heart_rep1	20M	IsoQuant	NoAnno	mouse
0.990855	0.989106	mouse_brain_rep2	6M	Bambu	NoAnno	mouse
0.990871	0.990162	human_heart_rep2	6M	IsoQuant	FullAnno	human
0.990873	0.989173	mouse_brain_rep1	6M	Bambu	NoAnno	mouse
0.990923	0.94542	mouse_brain_rep1	20M	IsoQuant	NoAnno	mouse
0.990937	0.989245	mouse_heart_rep2	3M	Bambu	NoAnno	mouse
0.991118	0.990863	human_brain_rep2	12M	IsoQuant	FullAnno	human
0.991135	0.989709	mouse_brain_rep2	12M	Bambu	NoAnno	mouse
0.991213	0.991009	human_brain_rep2	20M	IsoQuant	FullAnno	human
0.991242	0.990763	human_heart_rep1	12M	IsoQuant	FullAnno	human
0.991321	0.99108	human_heart_rep2	12M	IsoQuant	FullAnno	human
0.991392	0.991022	human_brain_rep1	12M	IsoQuant	FullAnno	human
0.991429	0.99007	mouse_heart_rep1	12M	Bambu	NoAnno	mouse
0.991481	0.991322	human_heart_rep1	20M	IsoQuant	FullAnno	human
0.991488	0.991281	human_heart_rep2	20M	IsoQuant	FullAnno	human
0.991635	0.949494	mouse_heart_rep2	20M	IsoQuant	NoAnno	mouse
0.991655	0.989857	mouse_brain_rep1	12M	Bambu	NoAnno	mouse
0.991682	0.990214	mouse_heart_rep1	20M	Bambu	NoAnno	mouse
0.991711	0.991453	human_brain_rep1	20M	IsoQuant	FullAnno	human
0.991754	0.990274	mouse_brain_rep2	20M	Bambu	NoAnno	mouse
0.991767	0.990203	mouse_heart_rep2	6M	Bambu	NoAnno	mouse
0.992077	0.990481	mouse_brain_rep1	20M	Bambu	NoAnno	mouse
0.992529	0.991027	mouse_heart_rep2	20M	Bambu	NoAnno	mouse
0.992538	0.991031	mouse_heart_rep2	12M	Bambu	NoAnno	mouse
0.995042	0.994521	mouse_brain_rep2	6M	ISAtools	ReduceAnno20	mouse
0.995069	0.995045	mouse_brain_rep2	12M	ISAtools	FullAnno	mouse
0.995084	0.994618	mouse_brain_rep2	3M	ISAtools	ReduceAnno20	mouse
0.995091	0.994515	mouse_brain_rep2	12M	ISAtools	ReduceAnno20	mouse
0.995093	0.995068	mouse_brain_rep2	6M	ISAtools	FullAnno	mouse
0.995107	0.99432	mouse_heart_rep1	6M	ISAtools	ReduceAnno20	mouse
0.99513	0.995105	mouse_brain_rep2	20M	ISAtools	FullAnno	mouse
0.995157	0.994401	mouse_brain_rep2	20M	ISAtools	ReduceAnno20	mouse
0.995164	0.995164	mouse_brain_rep2	3M	ISAtools	FullAnno	mouse
0.995168	0.995102	mouse_heart_rep1	12M	ISAtools	FullAnno	mouse
0.995203	0.99448	mouse_heart_rep1	12M	ISAtools	ReduceAnno20	mouse
0.995265	0.995265	mouse_heart_rep1	6M	ISAtools	FullAnno	mouse
0.995274	0.994838	mouse_brain_rep1	3M	ISAtools	ReduceAnno20	mouse
0.995277	0.994518	mouse_heart_rep1	3M	ISAtools	ReduceAnno20	mouse
0.995287	0.994692	mouse_brain_rep1	12M	ISAtools	ReduceAnno20	mouse
0.995322	0.994639	mouse_heart_rep1	20M	ISAtools	ReduceAnno20	mouse
0.995348	0.994823	mouse_brain_rep1	6M	ISAtools	ReduceAnno20	mouse
0.995353	0.994642	mouse_brain_rep1	20M	ISAtools	ReduceAnno20	mouse
0.99538	0.993971	human_heart_rep2	3M	ISAtools	FullAnno	human
0.995472	0.995439	mouse_heart_rep1	20M	ISAtools	FullAnno	mouse
0.995476	0.995453	mouse_brain_rep1	6M	ISAtools	FullAnno	mouse
0.995478	0.995433	mouse_brain_rep1	20M	ISAtools	FullAnno	mouse
0.995503	0.995403	mouse_heart_rep1	3M	ISAtools	FullAnno	mouse
0.995507	0.995484	mouse_brain_rep1	12M	ISAtools	FullAnno	mouse
0.995526	0.995503	mouse_brain_rep1	3M	ISAtools	FullAnno	mouse
0.995602	0.994945	mouse_heart_rep2	12M	ISAtools	ReduceAnno20	mouse
0.995649	0.995617	mouse_heart_rep2	12M	ISAtools	FullAnno	mouse
0.995798	0.995174	mouse_heart_rep2	6M	ISAtools	ReduceAnno20	mouse
0.9958	0.99511	mouse_heart_rep2	20M	ISAtools	ReduceAnno20	mouse
0.995812	0.99528	human_heart_rep1	12M	ISAtools	ReduceAnno20	human
0.99583	0.995202	mouse_heart_rep2	3M	ISAtools	ReduceAnno20	mouse
0.995845	0.995814	mouse_heart_rep2	6M	ISAtools	FullAnno	mouse
0.995846	0.995782	mouse_heart_rep2	3M	ISAtools	FullAnno	mouse
0.995863	0.995279	human_heart_rep1	20M	ISAtools	ReduceAnno20	human
0.995895	0.995861	human_heart_rep1	12M	ISAtools	FullAnno	human
0.995934	0.995518	human_heart_rep2	12M	ISAtools	ReduceAnno20	human
0.995941	0.995941	human_heart_rep1	20M	ISAtools	FullAnno	human
0.996002	0.99597	mouse_heart_rep2	20M	ISAtools	FullAnno	mouse
0.996004	0.995631	human_heart_rep2	3M	ISAtools	ReduceAnno20	human
0.996007	0.995571	human_heart_rep2	6M	ISAtools	ReduceAnno20	human
0.996099	0.996082	human_heart_rep2	12M	ISAtools	FullAnno	human
0.996159	0.996125	human_heart_rep2	6M	ISAtools	FullAnno	human
0.996217	0.995619	human_heart_rep1	6M	ISAtools	ReduceAnno20	human
0.99624	0.995737	human_heart_rep2	20M	ISAtools	ReduceAnno20	human
0.996246	0.995536	mouse_heart_rep1	12M	ISAtools	ReduceAnno40	mouse
0.996281	0.996246	human_heart_rep1	6M	ISAtools	FullAnno	human
0.996313	0.995939	human_brain_rep2	12M	ISAtools	ReduceAnno20	human
0.996329	0.995992	human_brain_rep2	6M	ISAtools	ReduceAnno20	human
0.996337	0.995939	human_brain_rep2	20M	ISAtools	ReduceAnno20	human
0.996342	0.995997	human_brain_rep2	3M	ISAtools	ReduceAnno20	human
0.996362	0.996325	human_brain_rep2	20M	ISAtools	FullAnno	human
0.9964	0.9964	human_heart_rep2	20M	ISAtools	FullAnno	human
0.996406	0.995807	mouse_heart_rep1	6M	ISAtools	ReduceAnno40	mouse
0.996437	0.996412	human_brain_rep2	12M	ISAtools	FullAnno	human
0.996441	0.9958	mouse_heart_rep1	3M	ISAtools	ReduceAnno40	mouse
0.996444	0.996114	human_heart_rep1	12M	ISAtools	ReduceAnno40	human
0.996482	0.995884	mouse_heart_rep1	20M	ISAtools	ReduceAnno40	mouse
0.996495	0.996093	human_heart_rep1	20M	ISAtools	ReduceAnno40	human
0.99652	0.996508	human_brain_rep2	6M	ISAtools	FullAnno	human
0.996531	0.996519	human_brain_rep1	20M	ISAtools	FullAnno	human
0.996545	0.996545	human_brain_rep1	12M	ISAtools	FullAnno	human
0.996575	0.996051	human_brain_rep1	12M	ISAtools	ReduceAnno20	human
0.996577	0.996577	human_brain_rep2	3M	ISAtools	FullAnno	human
0.99661	0.996051	human_brain_rep1	20M	ISAtools	ReduceAnno20	human
0.996648	0.996005	mouse_heart_rep2	12M	ISAtools	ReduceAnno40	mouse
0.996657	0.996491	mouse_brain_rep2	3M	ISAtools	ReduceAnno40	mouse
0.996689	0.996431	mouse_brain_rep2	12M	ISAtools	ReduceAnno40	mouse
0.996697	0.996308	human_heart_rep2	3M	ISAtools	ReduceAnno40	human
0.996713	0.996444	mouse_brain_rep2	20M	ISAtools	ReduceAnno40	mouse
0.996719	0.996274	human_brain_rep1	6M	ISAtools	ReduceAnno20	human
0.996721	0.996721	human_brain_rep1	6M	ISAtools	FullAnno	human
0.996746	0.996335	mouse_heart_rep2	3M	ISAtools	ReduceAnno40	mouse
0.996748	0.996206	mouse_heart_rep2	6M	ISAtools	ReduceAnno40	mouse
0.996759	0.9964	human_heart_rep2	12M	ISAtools	ReduceAnno40	human
0.996762	0.996519	mouse_brain_rep2	6M	ISAtools	ReduceAnno40	mouse
0.996765	0.996422	human_heart_rep2	6M	ISAtools	ReduceAnno40	human
0.996784	0.996631	mouse_heart_rep1	20M	Mandalorion	NoAnno	mouse
0.996831	0.996398	human_heart_rep1	6M	ISAtools	ReduceAnno40	human
0.996834	0.99629	mouse_brain_rep1	12M	ISAtools	ReduceAnno40	mouse
0.996848	0.996184	mouse_brain_rep1	20M	ISAtools	ReduceAnno40	mouse
0.996852	0.996307	mouse_brain_rep1	6M	ISAtools	ReduceAnno40	mouse
0.996917	0.99624	mouse_heart_rep2	20M	ISAtools	ReduceAnno40	mouse
0.996928	0.996446	mouse_brain_rep1	3M	ISAtools	ReduceAnno40	mouse
0.996943	0.996832	mouse_heart_rep2	20M	Mandalorion	NoAnno	mouse
0.997018	0.996827	mouse_brain_rep1	20M	Mandalorion	NoAnno	mouse
0.997039	0.996608	human_heart_rep2	20M	ISAtools	ReduceAnno40	human
0.997058	0.996541	human_heart_rep1	3M	ISAtools	ReduceAnno20	human
0.9971	0.996822	human_brain_rep2	3M	ISAtools	ReduceAnno40	human
0.997104	0.996985	mouse_brain_rep2	20M	Mandalorion	NoAnno	mouse
0.997119	0.996839	human_brain_rep2	12M	ISAtools	ReduceAnno40	human
0.997137	0.996908	human_brain_rep2	6M	ISAtools	ReduceAnno40	human
0.997155	0.996876	human_brain_rep2	20M	ISAtools	ReduceAnno40	human
0.997319	0.996945	human_brain_rep1	12M	ISAtools	ReduceAnno40	human
0.997326	0.997183	mouse_heart_rep2	20M	Mandalorion	ReduceAnno40	mouse
0.99733	0.997037	human_brain_rep1	6M	ISAtools	ReduceAnno40	human
0.997381	0.99697	human_brain_rep1	20M	ISAtools	ReduceAnno40	human
0.997424	0.997069	human_heart_rep1	3M	ISAtools	ReduceAnno40	human
0.997448	0.997412	human_heart_rep1	3M	ISAtools	FullAnno	human
0.997457	0.997397	mouse_brain_rep2	12M	Mandalorion	NoAnno	mouse
0.997499	0.997464	mouse_heart_rep2	20M	Mandalorion	FullAnno	mouse
0.997504	0.997312	mouse_heart_rep1	12M	Mandalorion	NoAnno	mouse
0.997543	0.997437	mouse_heart_rep2	20M	Mandalorion	ReduceAnno20	mouse
0.997609	0.997504	mouse_brain_rep1	20M	Mandalorion	ReduceAnno40	mouse
0.997618	0.997506	human_heart_rep2	6M	Mandalorion	FullAnno	human
0.997627	0.997516	mouse_heart_rep1	20M	Mandalorion	ReduceAnno40	mouse
0.997636	0.997545	human_heart_rep2	6M	Mandalorion	ReduceAnno20	human
0.997647	0.997647	human_brain_rep1	3M	ISAtools	FullAnno	human
0.997652	0.997319	human_brain_rep1	3M	ISAtools	ReduceAnno20	human
0.997697	0.997532	mouse_brain_rep1	12M	Mandalorion	NoAnno	mouse
0.997701	0.997598	mouse_brain_rep1	20M	Mandalorion	FullAnno	mouse
0.99771	0.997451	mouse_heart_rep2	12M	Mandalorion	NoAnno	mouse
0.997725	0.997725	mouse_heart_rep2	3M	Mandalorion	ReduceAnno20	mouse
0.997727	0.997695	human_heart_rep2	3M	Mandalorion	ReduceAnno20	human
0.997746	0.997703	mouse_heart_rep2	3M	Mandalorion	FullAnno	mouse
0.997748	0.997685	human_heart_rep2	3M	Mandalorion	FullAnno	human
0.997789	0.997698	human_heart_rep1	6M	Mandalorion	ReduceAnno20	human
0.997812	0.997692	human_heart_rep1	6M	Mandalorion	FullAnno	human
0.997815	0.99768	human_heart_rep1	12M	Mandalorion	ReduceAnno20	human
0.997822	0.997736	mouse_brain_rep2	20M	Mandalorion	ReduceAnno40	mouse
0.997822	0.997778	mouse_heart_rep2	3M	Mandalorion	ReduceAnno40	mouse
0.997835	0.997727	mouse_heart_rep1	20M	Mandalorion	FullAnno	mouse
0.997845	0.997756	human_heart_rep1	12M	Mandalorion	FullAnno	human
0.997846	0.997753	human_heart_rep2	6M	Mandalorion	ReduceAnno40	human
0.997856	0.997778	mouse_brain_rep1	20M	Mandalorion	ReduceAnno20	mouse
0.997866	0.997803	human_heart_rep2	20M	Mandalorion	ReduceAnno40	human
0.997885	0.997885	mouse_heart_rep2	3M	Mandalorion	NoAnno	mouse
0.997908	0.997786	human_heart_rep2	20M	Mandalorion	FullAnno	human
0.997915	0.997883	human_heart_rep2	3M	Mandalorion	ReduceAnno40	human
0.997918	0.997845	mouse_heart_rep1	20M	Mandalorion	ReduceAnno20	mouse
0.997928	0.997785	mouse_heart_rep2	12M	Mandalorion	ReduceAnno40	mouse
0.997938	0.997846	human_heart_rep1	6M	Mandalorion	ReduceAnno40	human
0.997945	0.997883	human_heart_rep2	20M	Mandalorion	ReduceAnno20	human
0.997951	0.997877	mouse_heart_rep2	6M	Mandalorion	ReduceAnno40	mouse
0.997959	0.997893	human_brain_rep2	6M	Mandalorion	ReduceAnno40	human
0.997973	0.997973	mouse_brain_rep2	6M	Mandalorion	FullAnno	mouse
0.997974	0.99788	mouse_brain_rep2	6M	Mandalorion	NoAnno	mouse
0.99798	0.997934	human_heart_rep1	12M	Mandalorion	ReduceAnno40	human
0.997984	0.997856	human_heart_rep1	20M	Mandalorion	FullAnno	human
0.997984	0.997852	human_heart_rep1	20M	Mandalorion	ReduceAnno40	human
0.997988	0.997911	mouse_heart_rep2	6M	Mandalorion	NoAnno	mouse
0.998005	0.997891	mouse_brain_rep1	6M	Mandalorion	NoAnno	mouse
0.998014	0.997932	human_brain_rep2	6M	Mandalorion	ReduceAnno20	human
0.998018	0.997962	mouse_brain_rep2	20M	Mandalorion	FullAnno	mouse
0.998031	0.9979	mouse_brain_rep1	12M	Mandalorion	ReduceAnno40	mouse
0.998039	0.997958	human_brain_rep2	6M	Mandalorion	FullAnno	human
0.998055	0.997973	human_heart_rep2	12M	Mandalorion	FullAnno	human
0.998065	0.997891	human_heart_rep1	20M	Mandalorion	ReduceAnno20	human
0.998067	0.997926	mouse_heart_rep2	12M	Mandalorion	ReduceAnno20	mouse
0.998069	0.99799	mouse_brain_rep1	6M	Mandalorion	FullAnno	mouse
0.998072	0.997863	human_brain_rep2	20M	Mandalorion	ReduceAnno40	human
0.998072	0.997989	human_heart_rep2	12M	Mandalorion	ReduceAnno20	human
0.998078	0.998021	mouse_brain_rep2	12M	Mandalorion	ReduceAnno40	mouse
0.99808	0.998052	mouse_brain_rep2	20M	Mandalorion	ReduceAnno20	mouse
0.998082	0.997973	mouse_heart_rep2	6M	Mandalorion	FullAnno	mouse
0.998087	0.997948	mouse_heart_rep2	12M	Mandalorion	FullAnno	mouse
0.998104	0.998059	human_brain_rep1	12M	Mandalorion	FullAnno	human
0.998126	0.997956	human_heart_rep1	12M	Mandalorion	NoAnno	human
0.998126	0.998126	mouse_brain_rep2	6M	Mandalorion	ReduceAnno20	mouse
0.998127	0.998047	mouse_brain_rep1	6M	Mandalorion	ReduceAnno20	mouse
0.998133	0.997986	mouse_heart_rep2	6M	Mandalorion	ReduceAnno20	mouse
0.998135	0.998073	human_brain_rep1	12M	Mandalorion	ReduceAnno40	human
0.998137	0.99806	mouse_brain_rep1	12M	Mandalorion	FullAnno	mouse
0.998146	0.997986	human_brain_rep2	20M	Mandalorion	FullAnno	human
0.998157	0.998129	mouse_brain_rep2	12M	Mandalorion	FullAnno	mouse
0.998162	0.998099	human_heart_rep2	12M	Mandalorion	ReduceAnno40	human
0.998164	0.998066	human_heart_rep2	6M	Mandalorion	NoAnno	human
0.998165	0.998165	mouse_brain_rep2	12M	Mandalorion	ReduceAnno20	mouse
0.998171	0.998054	human_heart_rep1	20M	Mandalorion	NoAnno	human
0.998171	0.997919	human_brain_rep2	20M	Mandalorion	NoAnno	human
0.998174	0.998085	human_heart_rep2	12M	Mandalorion	NoAnno	human
0.998175	0.99812	human_brain_rep1	3M	Mandalorion	FullAnno	human
0.998177	0.997932	human_brain_rep1	3M	ISAtools	ReduceAnno40	human
0.998197	0.998037	mouse_heart_rep1	6M	Mandalorion	NoAnno	mouse
0.99822	0.998183	mouse_heart_rep1	12M	Mandalorion	ReduceAnno40	mouse
0.998231	0.998216	human_brain_rep1	12M	Mandalorion	ReduceAnno20	human
0.99824	0.998156	human_brain_rep1	3M	Mandalorion	ReduceAnno40	human
0.998243	0.998154	mouse_brain_rep2	6M	Mandalorion	ReduceAnno40	mouse
0.998263	0.998186	mouse_heart_rep1	6M	Mandalorion	ReduceAnno40	mouse
0.998266	0.998183	human_brain_rep1	3M	Mandalorion	ReduceAnno20	human
0.998269	0.998049	human_brain_rep2	20M	Mandalorion	ReduceAnno20	human
0.998272	0.998168	mouse_brain_rep1	12M	Mandalorion	ReduceAnno20	mouse
0.998273	0.998226	human_brain_rep2	3M	Mandalorion	ReduceAnno40	human
0.998275	0.998162	mouse_heart_rep1	6M	Mandalorion	FullAnno	mouse
0.99828	0.99816	human_brain_rep1	20M	Mandalorion	ReduceAnno40	human
0.998304	0.998198	mouse_brain_rep1	3M	Mandalorion	FullAnno	mouse
0.998314	0.998191	mouse_brain_rep2	3M	Mandalorion	NoAnno	mouse
0.998317	0.998249	human_brain_rep2	3M	Mandalorion	FullAnno	human
0.998318	0.998188	human_heart_rep1	6M	Mandalorion	NoAnno	human
0.998319	0.998286	human_heart_rep2	3M	Mandalorion	NoAnno	human
0.998324	0.998278	human_brain_rep2	3M	Mandalorion	ReduceAnno20	human
0.998325	0.998253	mouse_brain_rep1	3M	Mandalorion	ReduceAnno20	mouse
0.998343	0.998268	human_brain_rep2	12M	Mandalorion	ReduceAnno40	human
0.998348	0.998348	human_heart_rep1	3M	Mandalorion	FullAnno	human
0.998349	0.998248	human_brain_rep2	12M	Mandalorion	FullAnno	human
0.998357	0.998248	mouse_heart_rep1	12M	Mandalorion	ReduceAnno20	mouse
0.998366	0.998284	mouse_brain_rep1	6M	Mandalorion	ReduceAnno40	mouse
0.998377	0.998341	mouse_heart_rep1	12M	Mandalorion	FullAnno	mouse
0.998377	0.998276	human_brain_rep1	20M	Mandalorion	FullAnno	human
0.998386	0.998311	mouse_brain_rep1	3M	Mandalorion	NoAnno	mouse
0.998406	0.998292	mouse_heart_rep1	6M	Mandalorion	ReduceAnno20	mouse
0.998414	0.998374	human_heart_rep1	3M	Mandalorion	ReduceAnno20	human
0.998414	0.998311	human_brain_rep1	20M	Mandalorion	ReduceAnno20	human
0.99843	0.998328	human_brain_rep2	12M	Mandalorion	ReduceAnno20	human
0.998431	0.99835	human_heart_rep1	3M	Mandalorion	ReduceAnno40	human
0.998432	0.998345	human_brain_rep1	6M	Mandalorion	ReduceAnno40	human
0.998475	0.998475	mouse_heart_rep1	3M	Mandalorion	NoAnno	mouse
0.998517	0.998432	human_brain_rep1	6M	Mandalorion	FullAnno	human
0.998518	0.998518	mouse_heart_rep1	3M	Mandalorion	FullAnno	mouse
0.998525	0.998447	mouse_brain_rep2	3M	Mandalorion	FullAnno	mouse
0.998536	0.99847	human_brain_rep1	12M	Mandalorion	NoAnno	human
0.998544	0.998439	human_brain_rep2	6M	Mandalorion	NoAnno	human
0.998545	0.998459	human_brain_rep1	6M	Mandalorion	ReduceAnno20	human
0.998618	0.998618	mouse_heart_rep1	3M	Mandalorion	ReduceAnno40	mouse
0.99863	0.998551	mouse_brain_rep2	3M	Mandalorion	ReduceAnno20	mouse
0.998639	0.998639	mouse_heart_rep1	3M	Mandalorion	ReduceAnno20	mouse
0.99864	0.998466	human_brain_rep1	20M	Mandalorion	NoAnno	human
0.998697	0.998661	mouse_brain_rep1	3M	Mandalorion	ReduceAnno40	mouse
0.998755	0.998677	human_brain_rep2	12M	Mandalorion	NoAnno	human
0.998808	0.998769	mouse_brain_rep2	3M	Mandalorion	ReduceAnno40	mouse
0.998834	0.998776	human_brain_rep1	3M	Mandalorion	NoAnno	human
0.998903	0.998812	human_brain_rep1	6M	Mandalorion	NoAnno	human
0.998973	0.998973	human_brain_rep2	3M	Mandalorion	NoAnno	human
0.999075	0.999075	human_heart_rep1	3M	Mandalorion	NoAnno	human
1	1	mouse_heart_rep1	3M	ISAtools	NoAnno	mouse
1	1	mouse_heart_rep1	6M	ISAtools	NoAnno	mouse
1	1	mouse_heart_rep1	20M	ISAtools	NoAnno	mouse
1	1	mouse_heart_rep2	3M	ISAtools	NoAnno	mouse
1	1	mouse_heart_rep2	6M	ISAtools	NoAnno	mouse
1	1	mouse_heart_rep1	12M	ISAtools	NoAnno	mouse
1	1	mouse_heart_rep2	20M	ISAtools	NoAnno	mouse
1	1	mouse_heart_rep2	12M	ISAtools	NoAnno	mouse
1	1	human_heart_rep1	3M	ISAtools	NoAnno	human
1	1	mouse_brain_rep2	3M	ISAtools	NoAnno	mouse
1	1	mouse_brain_rep2	6M	ISAtools	NoAnno	mouse
1	1	mouse_brain_rep1	3M	ISAtools	NoAnno	mouse
1	1	mouse_brain_rep2	20M	ISAtools	NoAnno	mouse
1	1	mouse_brain_rep2	12M	ISAtools	NoAnno	mouse
1	1	mouse_brain_rep1	6M	ISAtools	NoAnno	mouse
1	1	mouse_brain_rep1	12M	ISAtools	NoAnno	mouse
1	1	mouse_brain_rep1	20M	ISAtools	NoAnno	mouse
1	1	human_brain_rep1	3M	ISAtools	NoAnno	human
1	1	human_heart_rep1	6M	ISAtools	NoAnno	human
1	1	human_heart_rep2	3M	ISAtools	NoAnno	human
1	1	human_heart_rep1	20M	ISAtools	NoAnno	human
1	1	human_heart_rep2	6M	ISAtools	NoAnno	human
1	1	human_heart_rep2	20M	ISAtools	NoAnno	human
1	1	human_heart_rep2	12M	ISAtools	NoAnno	human
1	1	human_brain_rep2	3M	ISAtools	NoAnno	human
1	1	human_brain_rep1	6M	ISAtools	NoAnno	human
1	1	human_brain_rep2	6M	ISAtools	NoAnno	human
1	1	human_brain_rep2	12M	ISAtools	NoAnno	human
1	1	human_brain_rep2	20M	ISAtools	NoAnno	human
1	1	human_brain_rep1	12M	ISAtools	NoAnno	human
1	1	human_brain_rep1	20M	ISAtools	NoAnno	human

## Sheet: figure2C Sfig3
precision	recall	F1.score	sample	depth	tools	anno	source
0.91436	0.553272	0.689396	mouse_brain_rep1	3M	Bambu	ReduceAnno20	mouse
0.932819	0.590289	0.723038	mouse_brain_rep1	3M	Bambu	ReduceAnno40	mouse
0.961586	0.701698	0.811337	mouse_brain_rep1	3M	IsoQuant	ReduceAnno20	mouse
0.965604	0.683073	0.800129	mouse_brain_rep1	3M	IsoQuant	ReduceAnno40	mouse
0.874515	0.628881	0.731631	mouse_brain_rep1	3M	Mandalorion	ReduceAnno20	mouse
0.934648	0.609578	0.737897	mouse_brain_rep1	3M	Mandalorion	ReduceAnno40	mouse
0.863394	0.742573	0.798438	mouse_brain_rep1	3M	ISAtools	ReduceAnno20	mouse
0.916928	0.744541	0.821791	mouse_brain_rep1	3M	ISAtools	ReduceAnno40	mouse
0.96123	0.722694	0.825066	mouse_brain_rep1	6M	IsoQuant	ReduceAnno20	mouse
0.967063	0.707904	0.817434	mouse_brain_rep1	6M	IsoQuant	ReduceAnno40	mouse
0.913868	0.565222	0.698454	mouse_brain_rep1	6M	Bambu	ReduceAnno20	mouse
0.941249	0.595832	0.729728	mouse_brain_rep1	6M	Bambu	ReduceAnno40	mouse
0.872604	0.777976	0.822577	mouse_brain_rep1	6M	ISAtools	ReduceAnno20	mouse
0.921073	0.782009	0.845863	mouse_brain_rep1	6M	ISAtools	ReduceAnno40	mouse
0.869098	0.795622	0.830738	mouse_brain_rep1	6M	Mandalorion	ReduceAnno20	mouse
0.929344	0.771311	0.842985	mouse_brain_rep1	6M	Mandalorion	ReduceAnno40	mouse
0.960677	0.723029	0.825081	mouse_brain_rep1	12M	IsoQuant	ReduceAnno20	mouse
0.965925	0.707017	0.816436	mouse_brain_rep1	12M	IsoQuant	ReduceAnno40	mouse
0.910392	0.568461	0.699896	mouse_brain_rep1	12M	Bambu	ReduceAnno20	mouse
0.941856	0.596165	0.73016	mouse_brain_rep1	12M	Bambu	ReduceAnno40	mouse
0.862708	0.821086	0.841382	mouse_brain_rep1	12M	Mandalorion	ReduceAnno20	mouse
0.923935	0.794424	0.854298	mouse_brain_rep1	12M	Mandalorion	ReduceAnno40	mouse
0.873345	0.78088	0.824528	mouse_brain_rep1	12M	ISAtools	ReduceAnno20	mouse
0.921675	0.784614	0.847639	mouse_brain_rep1	12M	ISAtools	ReduceAnno40	mouse
0.956684	0.71778	0.820188	mouse_brain_rep1	20M	IsoQuant	ReduceAnno20	mouse
0.963289	0.703913	0.813424	mouse_brain_rep1	20M	IsoQuant	ReduceAnno40	mouse
0.914203	0.566451	0.699489	mouse_brain_rep1	20M	Bambu	ReduceAnno20	mouse
0.942587	0.59694	0.730962	mouse_brain_rep1	20M	Bambu	ReduceAnno40	mouse
0.864731	0.821756	0.842695	mouse_brain_rep1	20M	Mandalorion	ReduceAnno20	mouse
0.924217	0.794923	0.854707	mouse_brain_rep1	20M	Mandalorion	ReduceAnno40	mouse
0.85997	0.781215	0.818703	mouse_brain_rep1	20M	ISAtools	ReduceAnno20	mouse
0.912965	0.784891	0.844097	mouse_brain_rep1	20M	ISAtools	ReduceAnno40	mouse
0.963466	0.696133	0.808268	mouse_brain_rep2	3M	IsoQuant	ReduceAnno20	mouse
0.967689	0.686772	0.803381	mouse_brain_rep2	3M	IsoQuant	ReduceAnno40	mouse
0.920739	0.550522	0.689051	mouse_brain_rep2	3M	Bambu	ReduceAnno20	mouse
0.938405	0.573276	0.711743	mouse_brain_rep2	3M	Bambu	ReduceAnno40	mouse
0.870803	0.754696	0.808603	mouse_brain_rep2	3M	ISAtools	ReduceAnno20	mouse
0.920232	0.763371	0.834494	mouse_brain_rep2	3M	ISAtools	ReduceAnno40	mouse
0.886007	0.616452	0.727048	mouse_brain_rep2	3M	Mandalorion	ReduceAnno20	mouse
0.941886	0.609868	0.740356	mouse_brain_rep2	3M	Mandalorion	ReduceAnno40	mouse
0.918167	0.563413	0.698318	mouse_brain_rep2	6M	Bambu	ReduceAnno20	mouse
0.965767	0.720442	0.825258	mouse_brain_rep2	6M	IsoQuant	ReduceAnno20	mouse
0.942396	0.590657	0.726175	mouse_brain_rep2	6M	Bambu	ReduceAnno40	mouse
0.968362	0.713057	0.821326	mouse_brain_rep2	6M	IsoQuant	ReduceAnno40	mouse
0.876565	0.790792	0.831472	mouse_brain_rep2	6M	ISAtools	ReduceAnno20	mouse
0.922714	0.798744	0.856264	mouse_brain_rep2	6M	ISAtools	ReduceAnno40	mouse
0.874093	0.798649	0.834669	mouse_brain_rep2	6M	Mandalorion	ReduceAnno20	mouse
0.932853	0.77441	0.846279	mouse_brain_rep2	6M	Mandalorion	ReduceAnno40	mouse
0.964832	0.72081	0.825158	mouse_brain_rep2	12M	IsoQuant	ReduceAnno20	mouse
0.967349	0.711899	0.820193	mouse_brain_rep2	12M	IsoQuant	ReduceAnno40	mouse
0.915529	0.568201	0.701212	mouse_brain_rep2	12M	Bambu	ReduceAnno20	mouse
0.942047	0.597792	0.731437	mouse_brain_rep2	12M	Bambu	ReduceAnno40	mouse
0.874255	0.792142	0.831175	mouse_brain_rep2	12M	ISAtools	ReduceAnno20	mouse
0.919288	0.800207	0.855624	mouse_brain_rep2	12M	ISAtools	ReduceAnno40	mouse
0.870491	0.823573	0.846381	mouse_brain_rep2	12M	Mandalorion	ReduceAnno20	mouse
0.929047	0.799354	0.859334	mouse_brain_rep2	12M	Mandalorion	ReduceAnno40	mouse
0.963768	0.718478	0.823239	mouse_brain_rep2	20M	IsoQuant	ReduceAnno20	mouse
0.966467	0.71013	0.818702	mouse_brain_rep2	20M	IsoQuant	ReduceAnno40	mouse
0.921053	0.567219	0.702074	mouse_brain_rep2	20M	Bambu	ReduceAnno20	mouse
0.942123	0.599622	0.732829	mouse_brain_rep2	20M	Bambu	ReduceAnno40	mouse
0.881717	0.791651	0.83426	mouse_brain_rep2	20M	ISAtools	ReduceAnno20	mouse
0.9247	0.79911	0.857329	mouse_brain_rep2	20M	ISAtools	ReduceAnno40	mouse
0.871068	0.826151	0.848015	mouse_brain_rep2	20M	Mandalorion	ReduceAnno20	mouse
0.928324	0.800939	0.859939	mouse_brain_rep2	20M	Mandalorion	ReduceAnno40	mouse
0.968623	0.735256	0.835958	mouse_heart_rep1	3M	IsoQuant	ReduceAnno20	mouse
0.971702	0.735841	0.837482	mouse_heart_rep1	3M	IsoQuant	ReduceAnno40	mouse
0.933839	0.558004	0.69858	mouse_heart_rep1	3M	Bambu	ReduceAnno20	mouse
0.949684	0.568678	0.711377	mouse_heart_rep1	3M	Bambu	ReduceAnno40	mouse
0.892207	0.793908	0.840192	mouse_heart_rep1	3M	ISAtools	ReduceAnno20	mouse
0.931353	0.803351	0.862629	mouse_heart_rep1	3M	ISAtools	ReduceAnno40	mouse
0.895139	0.683247	0.77497	mouse_heart_rep1	3M	Mandalorion	ReduceAnno20	mouse
0.945986	0.670184	0.784552	mouse_heart_rep1	3M	Mandalorion	ReduceAnno40	mouse
0.934605	0.555736	0.697012	mouse_heart_rep1	6M	Bambu	ReduceAnno20	mouse
0.966044	0.737524	0.836457	mouse_heart_rep1	6M	IsoQuant	ReduceAnno20	mouse
0.945985	0.582696	0.721172	mouse_heart_rep1	6M	Bambu	ReduceAnno40	mouse
0.970407	0.73705	0.837782	mouse_heart_rep1	6M	IsoQuant	ReduceAnno40	mouse
0.885368	0.805898	0.843765	mouse_heart_rep1	6M	ISAtools	ReduceAnno20	mouse
0.927048	0.815919	0.86794	mouse_heart_rep1	6M	ISAtools	ReduceAnno40	mouse
0.880219	0.80606	0.841508	mouse_heart_rep1	6M	Mandalorion	ReduceAnno20	mouse
0.935094	0.784581	0.85325	mouse_heart_rep1	6M	Mandalorion	ReduceAnno40	mouse
0.964008	0.742061	0.838597	mouse_heart_rep1	12M	IsoQuant	ReduceAnno20	mouse
0.938703	0.553305	0.696228	mouse_heart_rep1	12M	Bambu	ReduceAnno20	mouse
0.951554	0.569645	0.712658	mouse_heart_rep1	12M	Bambu	ReduceAnno40	mouse
0.970356	0.740997	0.840306	mouse_heart_rep1	12M	IsoQuant	ReduceAnno40	mouse
0.892321	0.809624	0.848963	mouse_heart_rep1	12M	ISAtools	ReduceAnno20	mouse
0.932118	0.819705	0.872304	mouse_heart_rep1	12M	ISAtools	ReduceAnno40	mouse
0.873491	0.832307	0.852401	mouse_heart_rep1	12M	Mandalorion	ReduceAnno20	mouse
0.929388	0.812213	0.866858	mouse_heart_rep1	12M	Mandalorion	ReduceAnno40	mouse
0.964827	0.742223	0.83901	mouse_heart_rep1	20M	IsoQuant	ReduceAnno20	mouse
0.936654	0.560596	0.701398	mouse_heart_rep1	20M	Bambu	ReduceAnno20	mouse
0.969338	0.738581	0.83837	mouse_heart_rep1	20M	IsoQuant	ReduceAnno40	mouse
0.952471	0.569886	0.713104	mouse_heart_rep1	20M	Bambu	ReduceAnno40	mouse
0.891308	0.809138	0.848237	mouse_heart_rep1	20M	ISAtools	ReduceAnno20	mouse
0.931189	0.818738	0.87135	mouse_heart_rep1	20M	ISAtools	ReduceAnno40	mouse
0.87339	0.8349	0.853711	mouse_heart_rep1	20M	Mandalorion	ReduceAnno20	mouse
0.926814	0.813099	0.86624	mouse_heart_rep1	20M	Mandalorion	ReduceAnno40	mouse
0.965944	0.729654	0.831334	mouse_heart_rep2	3M	IsoQuant	ReduceAnno20	mouse
0.97113	0.734438	0.83636	mouse_heart_rep2	3M	IsoQuant	ReduceAnno40	mouse
0.932457	0.553165	0.694392	mouse_heart_rep2	3M	Bambu	ReduceAnno20	mouse
0.947749	0.578585	0.718523	mouse_heart_rep2	3M	Bambu	ReduceAnno40	mouse
0.888869	0.789367	0.836168	mouse_heart_rep2	3M	ISAtools	ReduceAnno20	mouse
0.932851	0.799164	0.860848	mouse_heart_rep2	3M	ISAtools	ReduceAnno40	mouse
0.897431	0.691612	0.781192	mouse_heart_rep2	3M	Mandalorion	ReduceAnno20	mouse
0.945789	0.668628	0.783417	mouse_heart_rep2	3M	Mandalorion	ReduceAnno40	mouse
0.964035	0.727159	0.829008	mouse_heart_rep2	6M	IsoQuant	ReduceAnno20	mouse
0.916456	0.56439	0.698572	mouse_heart_rep2	6M	Bambu	ReduceAnno20	mouse
0.970103	0.733586	0.835427	mouse_heart_rep2	6M	IsoQuant	ReduceAnno40	mouse
0.944063	0.59585	0.730586	mouse_heart_rep2	6M	Bambu	ReduceAnno40	mouse
0.880295	0.800281	0.838383	mouse_heart_rep2	6M	ISAtools	ReduceAnno20	mouse
0.92799	0.812171	0.866226	mouse_heart_rep2	6M	ISAtools	ReduceAnno40	mouse
0.887509	0.801996	0.842588	mouse_heart_rep2	6M	Mandalorion	ReduceAnno20	mouse
0.939653	0.783602	0.854561	mouse_heart_rep2	6M	Mandalorion	ReduceAnno40	mouse
0.924223	0.56096	0.698166	mouse_heart_rep2	12M	Bambu	ReduceAnno20	mouse
0.944857	0.581062	0.719593	mouse_heart_rep2	12M	Bambu	ReduceAnno40	mouse
0.964176	0.734331	0.833702	mouse_heart_rep2	12M	IsoQuant	ReduceAnno20	mouse
0.970426	0.736761	0.837602	mouse_heart_rep2	12M	IsoQuant	ReduceAnno40	mouse
0.88862	0.802307	0.84326	mouse_heart_rep2	12M	ISAtools	ReduceAnno20	mouse
0.930818	0.813565	0.86825	mouse_heart_rep2	12M	ISAtools	ReduceAnno40	mouse
0.880243	0.834269	0.856639	mouse_heart_rep2	12M	Mandalorion	ReduceAnno20	mouse
0.933233	0.812713	0.868813	mouse_heart_rep2	12M	Mandalorion	ReduceAnno40	mouse
0.963984	0.730278	0.831012	mouse_heart_rep2	20M	IsoQuant	ReduceAnno20	mouse
0.925736	0.563611	0.700649	mouse_heart_rep2	20M	Bambu	ReduceAnno20	mouse
0.970826	0.734283	0.836147	mouse_heart_rep2	20M	IsoQuant	ReduceAnno40	mouse
0.948635	0.589114	0.726847	mouse_heart_rep2	20M	Bambu	ReduceAnno40	mouse
0.891527	0.802152	0.84448	mouse_heart_rep2	20M	ISAtools	ReduceAnno20	mouse
0.933861	0.813332	0.869439	mouse_heart_rep2	20M	ISAtools	ReduceAnno40	mouse
0.874306	0.835048	0.854226	mouse_heart_rep2	20M	Mandalorion	ReduceAnno20	mouse
0.929462	0.814107	0.867968	mouse_heart_rep2	20M	Mandalorion	ReduceAnno40	mouse
0.921306	0.409153	0.566654	human_brain_rep1	3M	Bambu	ReduceAnno20	human
0.938065	0.400283	0.561126	human_brain_rep1	3M	Bambu	ReduceAnno40	human
0.970219	0.491828	0.652757	human_brain_rep1	3M	IsoQuant	ReduceAnno20	human
0.897352	0.439049	0.589615	human_brain_rep1	3M	Mandalorion	ReduceAnno20	human
0.971088	0.475001	0.637951	human_brain_rep1	3M	IsoQuant	ReduceAnno40	human
0.945878	0.42017	0.581867	human_brain_rep1	3M	Mandalorion	ReduceAnno40	human
0.91247	0.538425	0.677232	human_brain_rep1	3M	ISAtools	ReduceAnno20	human
0.943728	0.539083	0.686193	human_brain_rep1	3M	ISAtools	ReduceAnno40	human
0.966832	0.661813	0.785759	human_brain_rep1	6M	IsoQuant	ReduceAnno20	human
0.967767	0.623641	0.758497	human_brain_rep1	6M	IsoQuant	ReduceAnno40	human
0.929616	0.529094	0.674368	human_brain_rep1	6M	Bambu	ReduceAnno20	human
0.937693	0.509472	0.660226	human_brain_rep1	6M	Bambu	ReduceAnno40	human
0.885878	0.551798	0.680022	human_brain_rep1	6M	Mandalorion	ReduceAnno20	human
0.939122	0.526767	0.674946	human_brain_rep1	6M	Mandalorion	ReduceAnno40	human
0.899302	0.757979	0.822614	human_brain_rep1	6M	ISAtools	ReduceAnno20	human
0.935643	0.759023	0.838129	human_brain_rep1	6M	ISAtools	ReduceAnno40	human
0.933931	0.54526	0.688532	human_brain_rep1	12M	Bambu	ReduceAnno20	human
0.946237	0.520108	0.671255	human_brain_rep1	12M	Bambu	ReduceAnno40	human
0.968939	0.693432	0.808355	human_brain_rep1	12M	IsoQuant	ReduceAnno20	human
0.969853	0.651159	0.779178	human_brain_rep1	12M	IsoQuant	ReduceAnno40	human
0.879566	0.757028	0.813709	human_brain_rep1	12M	Mandalorion	ReduceAnno20	human
0.933774	0.712442	0.808229	human_brain_rep1	12M	Mandalorion	ReduceAnno40	human
0.901672	0.804458	0.850295	human_brain_rep1	12M	ISAtools	ReduceAnno20	human
0.937117	0.80746	0.86747	human_brain_rep1	12M	ISAtools	ReduceAnno40	human
0.966769	0.689926	0.805216	human_brain_rep1	20M	IsoQuant	ReduceAnno20	human
0.92698	0.55156	0.691608	human_brain_rep1	20M	Bambu	ReduceAnno20	human
0.943373	0.526178	0.675556	human_brain_rep1	20M	Bambu	ReduceAnno40	human
0.968429	0.648007	0.776459	human_brain_rep1	20M	IsoQuant	ReduceAnno40	human
0.868544	0.782645	0.82336	human_brain_rep1	20M	Mandalorion	ReduceAnno20	human
0.925892	0.735099	0.819537	human_brain_rep1	20M	Mandalorion	ReduceAnno40	human
0.897702	0.805825	0.849285	human_brain_rep1	20M	ISAtools	ReduceAnno20	human
0.934072	0.809817	0.867517	human_brain_rep1	20M	ISAtools	ReduceAnno40	human
0.927749	0.556581	0.695758	human_brain_rep2	3M	Bambu	ReduceAnno20	human
0.938448	0.521736	0.670631	human_brain_rep2	3M	Bambu	ReduceAnno40	human
0.965425	0.684539	0.801073	human_brain_rep2	3M	IsoQuant	ReduceAnno20	human
0.967416	0.651215	0.77843	human_brain_rep2	3M	IsoQuant	ReduceAnno40	human
0.887791	0.533044	0.666131	human_brain_rep2	3M	Mandalorion	ReduceAnno20	human
0.94089	0.509935	0.661407	human_brain_rep2	3M	Mandalorion	ReduceAnno40	human
0.913605	0.747998	0.822548	human_brain_rep2	3M	ISAtools	ReduceAnno20	human
0.944652	0.750265	0.836311	human_brain_rep2	3M	ISAtools	ReduceAnno40	human
0.966221	0.706487	0.816188	human_brain_rep2	6M	IsoQuant	ReduceAnno20	human
0.968258	0.671844	0.793265	human_brain_rep2	6M	IsoQuant	ReduceAnno40	human
0.921116	0.565385	0.700685	human_brain_rep2	6M	Bambu	ReduceAnno20	human
0.939769	0.539605	0.685565	human_brain_rep2	6M	Bambu	ReduceAnno40	human
0.880118	0.732041	0.799279	human_brain_rep2	6M	Mandalorion	ReduceAnno20	human
0.935211	0.694081	0.796802	human_brain_rep2	6M	Mandalorion	ReduceAnno40	human
0.913749	0.794706	0.85008	human_brain_rep2	6M	ISAtools	ReduceAnno20	human
0.943895	0.798744	0.865274	human_brain_rep2	6M	ISAtools	ReduceAnno40	human
0.964762	0.708015	0.816684	human_brain_rep2	12M	IsoQuant	ReduceAnno20	human
0.967038	0.671966	0.79294	human_brain_rep2	12M	IsoQuant	ReduceAnno40	human
0.92238	0.566669	0.702037	human_brain_rep2	12M	Bambu	ReduceAnno20	human
0.944516	0.534508	0.682682	human_brain_rep2	12M	Bambu	ReduceAnno40	human
0.867564	0.807789	0.836609	human_brain_rep2	12M	Mandalorion	ReduceAnno20	human
0.926429	0.763644	0.837196	human_brain_rep2	12M	Mandalorion	ReduceAnno40	human
0.908261	0.802592	0.852163	human_brain_rep2	12M	ISAtools	ReduceAnno20	human
0.940037	0.806601	0.868222	human_brain_rep2	12M	ISAtools	ReduceAnno40	human
0.963832	0.705447	0.814642	human_brain_rep2	20M	IsoQuant	ReduceAnno20	human
0.966446	0.669326	0.790901	human_brain_rep2	20M	IsoQuant	ReduceAnno40	human
0.916167	0.569909	0.702698	human_brain_rep2	20M	Bambu	ReduceAnno20	human
0.940966	0.541577	0.687474	human_brain_rep2	20M	Bambu	ReduceAnno40	human
0.87275	0.809256	0.839804	human_brain_rep2	20M	Mandalorion	ReduceAnno20	human
0.928134	0.764008	0.838111	human_brain_rep2	20M	Mandalorion	ReduceAnno40	human
0.898521	0.802225	0.847647	human_brain_rep2	20M	ISAtools	ReduceAnno20	human
0.934893	0.807208	0.866371	human_brain_rep2	20M	ISAtools	ReduceAnno40	human
0.921289	0.405171	0.56282	human_heart_rep1	3M	Bambu	ReduceAnno20	human
0.938776	0.39726	0.558275	human_heart_rep1	3M	Bambu	ReduceAnno40	human
0.971381	0.50146	0.661454	human_heart_rep1	3M	IsoQuant	ReduceAnno20	human
0.972966	0.482302	0.644917	human_heart_rep1	3M	IsoQuant	ReduceAnno40	human
0.90687	0.439959	0.592481	human_heart_rep1	3M	Mandalorion	ReduceAnno20	human
0.949095	0.417213	0.579627	human_heart_rep1	3M	Mandalorion	ReduceAnno40	human
0.894119	0.510651	0.650046	human_heart_rep1	3M	ISAtools	ReduceAnno20	human
0.936226	0.503999	0.655254	human_heart_rep1	3M	ISAtools	ReduceAnno40	human
0.967382	0.654699	0.780902	human_heart_rep1	6M	IsoQuant	ReduceAnno20	human
0.969617	0.612312	0.750612	human_heart_rep1	6M	IsoQuant	ReduceAnno40	human
0.930532	0.515461	0.663423	human_heart_rep1	6M	Bambu	ReduceAnno20	human
0.934702	0.513358	0.66273	human_heart_rep1	6M	Bambu	ReduceAnno40	human
0.89272	0.560385	0.688548	human_heart_rep1	6M	Mandalorion	ReduceAnno20	human
0.941322	0.535736	0.682843	human_heart_rep1	6M	Mandalorion	ReduceAnno40	human
0.877112	0.76267	0.815897	human_heart_rep1	6M	ISAtools	ReduceAnno20	human
0.926093	0.768697	0.840086	human_heart_rep1	6M	ISAtools	ReduceAnno40	human
0.966687	0.677976	0.79699	human_heart_rep1	12M	IsoQuant	ReduceAnno20	human
0.969174	0.635327	0.767518	human_heart_rep1	12M	IsoQuant	ReduceAnno40	human
0.928001	0.529205	0.674033	human_heart_rep1	12M	Bambu	ReduceAnno20	human
0.938189	0.521101	0.670039	human_heart_rep1	12M	Bambu	ReduceAnno40	human
0.884643	0.741711	0.806896	human_heart_rep1	12M	Mandalorion	ReduceAnno20	human
0.936011	0.696971	0.798995	human_heart_rep1	12M	Mandalorion	ReduceAnno40	human
0.879899	0.806133	0.841402	human_heart_rep1	12M	ISAtools	ReduceAnno20	human
0.926396	0.812814	0.865896	human_heart_rep1	12M	ISAtools	ReduceAnno40	human
0.965754	0.675829	0.795189	human_heart_rep1	20M	IsoQuant	ReduceAnno20	human
0.969076	0.633243	0.765965	human_heart_rep1	20M	IsoQuant	ReduceAnno40	human
0.927289	0.532383	0.676416	human_heart_rep1	20M	Bambu	ReduceAnno20	human
0.938016	0.52727	0.675072	human_heart_rep1	20M	Bambu	ReduceAnno40	human
0.872334	0.765934	0.815678	human_heart_rep1	20M	Mandalorion	ReduceAnno20	human
0.927832	0.717051	0.808936	human_heart_rep1	20M	Mandalorion	ReduceAnno40	human
0.874687	0.809397	0.840776	human_heart_rep1	20M	ISAtools	ReduceAnno20	human
0.924411	0.816302	0.866999	human_heart_rep1	20M	ISAtools	ReduceAnno40	human
0.966568	0.678004	0.796969	human_heart_rep2	3M	IsoQuant	ReduceAnno20	human
0.967405	0.633431	0.76558	human_heart_rep2	3M	IsoQuant	ReduceAnno40	human
0.91967	0.547443	0.686336	human_heart_rep2	3M	Bambu	ReduceAnno20	human
0.935907	0.520415	0.66889	human_heart_rep2	3M	Bambu	ReduceAnno40	human
0.893623	0.533721	0.668298	human_heart_rep2	3M	Mandalorion	ReduceAnno20	human
0.943083	0.505871	0.658514	human_heart_rep2	3M	Mandalorion	ReduceAnno40	human
0.899254	0.76158	0.82471	human_heart_rep2	3M	ISAtools	ReduceAnno20	human
0.934849	0.759095	0.837854	human_heart_rep2	3M	ISAtools	ReduceAnno40	human
0.965485	0.695551	0.808584	human_heart_rep2	6M	IsoQuant	ReduceAnno20	human
0.967571	0.647851	0.776072	human_heart_rep2	6M	IsoQuant	ReduceAnno40	human
0.918348	0.552765	0.690131	human_heart_rep2	6M	Bambu	ReduceAnno20	human
0.9333	0.540192	0.684308	human_heart_rep2	6M	Bambu	ReduceAnno40	human
0.88609	0.728399	0.799543	human_heart_rep2	6M	Mandalorion	ReduceAnno20	human
0.937255	0.680689	0.788629	human_heart_rep2	6M	Mandalorion	ReduceAnno40	human
0.896012	0.799667	0.845102	human_heart_rep2	6M	ISAtools	ReduceAnno20	human
0.933369	0.798772	0.86084	human_heart_rep2	6M	ISAtools	ReduceAnno40	human
0.92438	0.54894	0.688823	human_heart_rep2	12M	Bambu	ReduceAnno20	human
0.942053	0.531169	0.679312	human_heart_rep2	12M	Bambu	ReduceAnno40	human
0.964431	0.692225	0.805964	human_heart_rep2	12M	IsoQuant	ReduceAnno20	human
0.967061	0.643525	0.772797	human_heart_rep2	12M	IsoQuant	ReduceAnno40	human
0.87455	0.787859	0.828943	human_heart_rep2	12M	Mandalorion	ReduceAnno20	human
0.930213	0.735363	0.82139	human_heart_rep2	12M	Mandalorion	ReduceAnno40	human
0.883246	0.808399	0.844166	human_heart_rep2	12M	ISAtools	ReduceAnno20	human
0.926926	0.807466	0.863081	human_heart_rep2	12M	ISAtools	ReduceAnno40	human
0.962924	0.691143	0.804705	human_heart_rep2	20M	IsoQuant	ReduceAnno20	human
0.965983	0.64233	0.771591	human_heart_rep2	20M	IsoQuant	ReduceAnno40	human
0.922637	0.550437	0.689515	human_heart_rep2	20M	Bambu	ReduceAnno20	human
0.941757	0.5343	0.68179	human_heart_rep2	20M	Bambu	ReduceAnno40	human
0.871521	0.794262	0.831099	human_heart_rep2	20M	Mandalorion	ReduceAnno20	human
0.927201	0.742532	0.824654	human_heart_rep2	20M	Mandalorion	ReduceAnno40	human
0.895447	0.806237	0.848503	human_heart_rep2	20M	ISAtools	ReduceAnno20	human
0.933846	0.806106	0.865286	human_heart_rep2	20M	ISAtools	ReduceAnno40	human

## Sheet: figure2D figure3E
SSC_Precision	SSC_Recall	SSC_F1score	TssTes_Precision	TssTes_Recall	TssTes_F1score	tools	anno
0.911765	0.516667	0.659574	0.823529	0.459016	0.589473	IsoQuant	NoAnno
1	0.933333	0.965517	1	0.918033	0.957264	IsoQuant	FullAnno
0.962264	0.85	0.902654	0.962264	0.836066	0.894736	ISAtools	NoAnno
1	1	0.999999	1	1	0.999999	Bambu	FullAnno
0.967213	0.983333	0.975206	0.95082	0.95082	0.950819	ISAtools	FullAnno
0.978723	0.766667	0.859813	0.978723	0.754098	0.851851	Mandalorion	NoAnno
1	0.8	0.888888	1	0.786885	0.880733	Bambu	ReduceAnno20
0.966667	0.966667	0.966666	0.95	0.934426	0.942148	ISAtools	ReduceAnno20
1	0.616667	0.762886	1	0.622951	0.767676	Bambu	ReduceAnno40
0.982143	0.916667	0.948275	0.982143	0.901639	0.94017	ISAtools	ReduceAnno40
0.916667	0.55	0.6875	0.916667	0.540984	0.680412	Bambu	NoAnno
1	0.866667	0.928571	1	0.852459	0.920353	IsoQuant	ReduceAnno20
1	0.783333	0.878504	1	0.770492	0.87037	IsoQuant	ReduceAnno40
0.980769	0.85	0.910714	0.980769	0.836066	0.902654	Mandalorion	FullAnno
0.98	0.816667	0.890909	0.98	0.803279	0.882882	Mandalorion	ReduceAnno20
0.980392	0.833333	0.9009	0.980392	0.819672	0.892857	Mandalorion	ReduceAnno40

## Sheet: figure3A
start	end	cluster
136375756	136641540	0
136375783	136641540	0
136375786	136641532	0
136375786	136641540	0
136375787	136642607	1
136375788	136641540	0
136375788	136641538	0
136375789	136642607	1
136375790	136642606	1
136375805	136641540	0
136375805	136641538	0
136375805	136641540	0
136375805	136641540	0
136375806	136641539	0
136375807	136641540	0
136375808	136641540	0
136375811	136641538	0
136375812	136642607	1
136375812	136641540	0
136375817	136641538	0
136375820	136642607	1
136375821	136641541	0
136375821	136641540	0
136375821	136641538	0
136375821	136641540	0
136375822	136641538	0
136375822	136642605	1
136375822	136641538	0
136375822	136641540	0
136375822	136641540	0
136375822	136641540	0
136375825	136641538	0
136375825	136642607	1
136375828	136641538	0
136375828	136641540	0
136375828	136641540	0
136375829	136641539	0
136375830	136641540	0
136375831	136641538	0
136375831	136642607	1
136375831	136641535	0
136375832	136642607	1
136375832	136641539	0
136375832	136642607	1
136375832	136641538	0
136375833	136641540	0
136375834	136641538	0
136375834	136641540	0
136375834	136641540	0
136375834	136642607	1
136375834	136642605	1
136375834	136642606	1
136375834	136641539	0
136375834	136641540	0
136375834	136641540	0
136375834	136641539	0
136375834	136641540	0
136375834	136641539	0
136375834	136642607	1
136375834	136641539	0
136375834	136641539	0
136375834	136642607	1
136375834	136641538	0
136375834	136642605	1
136375835	136641540	0
136375835	136641538	0
136375835	136641540	0
136375835	136641540	0
136375835	136642607	1
136375835	136642607	1
136375835	136642607	1
136375835	136642607	1
136375835	136641540	0
136375836	136641540	0
136375836	136641536	0
136375836	136641540	0
136375836	136641538	0
136375836	136641539	0
136375836	136641540	0
136375836	136641540	0
136375837	136641540	0
136375837	136641539	0
136375837	136641538	0
136375838	136641539	0
136375839	136641539	0
136375840	136641540	0
136375840	136641540	0
136375840	136641538	0
136375840	136642606	1
136375840	136641540	0
136375840	136641540	0
136375840	136641540	0
136375840	136641540	0
136375840	136642606	1
136375840	136641540	0
136375840	136642606	1
136375841	136641540	0
136375841	136642605	1
136375841	136641540	0
136375841	136641538	0
136375841	136642607	1
136375841	136642605	1
136375842	136641540	0
136375842	136641540	0
136375842	136641538	0
136375843	136641538	0
136375843	136641539	0
136375843	136642607	1
136375843	136642607	1
136375843	136642605	1
136375843	136641540	0
136375843	136641533	0
136375843	136641540	0
136375843	136642606	1
136375843	136641539	0
136375843	136641540	0
136375843	136642607	1
136375843	136641542	0
136375843	136641539	0
136375843	136641540	0
136375843	136641540	0
136375844	136641540	0
136375844	136642606	1
136375844	136641540	0
136375844	136641540	0
136375845	136641539	0
136375845	136641538	0
136375845	136641540	0
136375846	136641540	0
136375846	136641540	0
136375846	136641540	0
136375846	136641540	0
136375846	136641540	0
136375846	136641540	0
136375846	136641540	0
136375846	136641540	0
136375847	136641539	0
136375847	136642607	1
136375848	136641540	0
136375848	136641540	0
136375849	136641538	0
136375849	136641540	0
136375849	136641540	0
136375849	136641536	0
136375849	136641537	0
136375849	136641540	0
136375849	136641540	0
136375849	136642607	1
136375850	136641540	0
136375850	136642607	1
136375850	136642607	1
136375851	136641540	0
136375851	136641539	0
136375851	136641540	0
136375852	136641538	0
136375852	136641540	0
136375852	136641540	0
136375852	136641540	0
136375852	136641538	0
136375852	136641538	0
136375852	136641540	0
136375852	136642607	1
136375853	136641540	0
136375853	136641523	0
136375853	136641540	0
136375853	136641540	0
136375853	136641540	0
136375853	136641540	0
136375853	136641540	0
136375853	136641538	0
136375853	136641539	0
136375853	136641539	0
136375854	136642606	1
136375854	136641540	0
136375854	136641539	0
136375854	136642607	1
136375854	136642607	1
136375854	136641540	0
136375855	136641540	0
136375855	136641540	0
136375855	136641540	0
136375855	136642607	1
136375856	136641539	0
136375856	136641540	0
136375857	136641540	0
136375857	136642606	1
136375857	136642607	1
136375858	136641538	0
136375858	136641540	0
136375858	136641540	0
136375859	136641539	0
136375859	136641540	0
136375859	136641539	0
136375859	136641540	0
136375859	136641540	0
136375859	136641538	0
136375859	136642607	1
136375860	136641536	0
136375860	136641540	0
136375860	136641540	0
136375861	136641538	0
136375861	136641540	0
136375863	136641538	0
136375863	136641540	0
136375863	136641538	0
136375864	136641540	0
136375864	136641540	0
136375864	136641541	0
136375865	136641540	0
136375865	136641540	0
136375865	136641540	0
136375866	136642607	1
136375867	136641540	0
136375867	136641540	0
136375867	136642605	1
136375869	136641540	0
136375869	136641540	0
136375869	136641540	0
136375869	136641539	0
136375869	136641540	0
136375869	136642607	1
136375869	136641540	0
136375869	136642602	1
136375869	136641538	0
136375869	136641540	0
136375869	136641540	0
136375869	136642607	1
136375869	136641538	0
136375869	136641540	0
136375869	136641539	0
136375869	136642597	1
136375869	136641538	0
136375869	136641540	0
136375869	136642607	1
136375869	136642607	1
136375869	136641540	0
136375869	136642601	1
136375870	136641540	0
136375870	136642607	1
136375870	136641540	0
136375870	136641538	0
136375870	136642607	1
136375870	136641539	0
136375870	136641540	0
136375870	136641539	0
136375870	136641540	0
136375870	136641540	0
136375870	136642607	1
136375870	136642607	1
136375870	136641538	0
136375870	136642607	1
136375870	136641538	0
136375872	136641540	0
136375872	136641540	0
136375872	136641539	0
136375873	136641532	0
136375873	136641538	0
136375873	136641540	0
136375873	136641538	0
136375873	136641540	0
136375873	136641540	0
136375873	136641538	0
136375873	136641539	0
136375873	136642607	1
136375873	136641540	0
136375873	136641540	0
136375874	136641539	0
136375874	136641540	0
136375875	136642605	1
136375875	136641540	0
136375875	136642607	1
136375876	136641540	0
136375876	136642607	1
136375876	136641538	0
136375876	136642607	1
136375877	136641539	0
136375878	136641540	0
136375878	136641540	0
136375878	136642606	1
136375878	136641539	0
136375878	136641540	0
136375878	136642607	1
136375878	136641538	0
136375878	136641539	0
136375878	136642607	1
136375878	136641539	0
136375878	136641539	0
136375878	136641538	0
136375878	136641540	0
136375878	136642611	1
136375879	136642602	1
136375879	136641540	0
136375879	136641540	0
136375881	136641540	0
136375881	136641539	0
136375881	136642605	1
136375881	136641540	0
136375881	136642607	1
136375881	136641532	0
136375881	136641540	0
136375881	136641540	0
136375881	136641539	0
136375881	136642607	1
136375881	136642607	1
136375881	136642606	1
136375881	136641540	0
136375881	136642607	1
136375881	136641540	0
136375881	136641540	0
136375881	136641540	0
136375881	136641539	0
136375881	136642607	1
136375881	136641540	0
136375881	136641540	0
136375881	136641540	0
136375881	136641540	0
136375882	136641540	0
136375882	136641540	0
136375882	136641540	0
136375882	136641540	0
136375882	136641540	0
136375882	136641540	0
136375882	136641540	0
136375882	136641540	0
136375882	136641540	0
136375882	136641540	0
136375883	136641540	0
136375884	136642607	1
136375884	136641538	0
136375884	136641540	0
136375884	136641538	0
136375884	136641539	0
136375884	136642607	1
136375884	136641538	0
136375884	136641538	0
136375884	136641540	0
136375885	136642609	1
136375885	136641539	0
136375885	136641532	0
136375885	136641538	0
136375885	136642607	1
136375885	136641538	0
136375886	136641540	0
136375886	136642606	1
136375887	136641540	0
136375887	136641539	0
136375887	136641539	0
136375888	136641540	0
136375888	136641540	0
136375888	136641539	0
136375888	136641540	0
136375890	136641540	0
136375890	136641540	0
136375891	136641538	0
136375891	136641539	0
136375891	136641540	0
136375891	136641540	0
136375891	136641540	0
136375892	136641540	0
136375892	136641540	0
136375892	136642593	1
136375892	136642607	1
136375893	136641539	0
136375894	136641539	0
136375894	136641538	0
136375894	136641538	0
136375894	136641538	0
136375894	136642605	1
136375895	136641538	0
136375895	136641538	0
136375896	136641540	0
136375896	136642606	1
136375897	136641540	0
136375899	136642607	1
136375899	136641540	0
136375899	136641539	0
136375899	136641539	0
136375899	136642606	1
136375900	136641539	0
136375900	136641539	0
136375902	136641540	0
136375902	136641538	0
136375902	136641540	0
136375902	136641539	0
136375902	136641540	0
136375902	136641538	0
136375902	136641539	0
136375903	136641540	0
136375903	136641540	0
136375903	136641540	0
136375904	136641540	0
136375904	136642605	1
136375904	136641540	0
136375904	136641538	0
136375906	136641540	0
136375906	136642607	1
136375908	136642605	1
136375908	136641540	0
136375910	136641540	0
136375911	136641540	0
136375911	136641540	0
136375912	136641540	0
136375912	136641540	0
136375912	136641538	0
136375913	136641540	0
136375913	136641532	0
136375914	136641539	0
136375914	136641538	0
136375914	136641540	0
136375917	136641540	0
136375917	136641539	0
136375918	136641540	0
136375918	136641540	0
136375918	136641539	0
136375918	136641540	0
136375918	136641540	0
136375918	136641540	0
136375918	136641540	0
136375918	136642607	1
136375918	136642602	1
136375918	136641540	0
136375918	136641538	0
136375920	136641538	0
136375921	136641540	0
136375921	136641540	0
136375921	136642607	1
136375921	136641540	0
136375922	136641539	0
136375922	136641540	0
136375922	136641534	0
136375922	136641538	0
136375922	136641540	0
136375922	136641540	0
136375922	136641539	0
136375923	136641538	0
136375925	136641540	0
136375926	136641539	0
136375926	136641538	0
136375926	136641537	0
136375926	136642607	1
136375926	136642607	1
136375926	136641540	0
136375926	136641538	0
136375926	136641540	0
136375927	136641538	0
136375927	136642602	1
136375927	136642607	1
136375930	136641536	0
136375934	136642607	1
136375937	136641540	0
136375937	136642607	1
136375938	136641538	0
136375938	136641539	0
136375940	136642606	1
136375941	136641540	0
136375942	136641539	0
136375942	136641540	0
136375942	136641540	0
136375943	136641539	0
136375943	136641540	0
136375943	136641539	0
136375944	136641540	0
136375944	136641540	0
136375944	136642607	1
136375944	136641540	0
136375944	136642604	1
136375945	136641540	0
136375945	136641538	0
136375946	136641538	0
136375948	136641540	0
136375951	136641540	0
136375951	136641538	0
136375952	136641492	0
136375952	136641540	0
136375955	136642607	1
136375955	136641540	0
136375955	136641540	0
136375955	136641540	0
136375956	136641540	0
136375956	136641540	0
136375956	136642606	1
136375957	136641540	0
136375957	136641539	0
136375958	136641540	0
136375959	136641537	0
136375959	136642606	1
136375962	136641538	0
136375962	136641540	0
136375962	136642607	1
136375963	136641540	0
136375964	136641539	0
136375964	136641538	0
136375964	136641540	0
136375965	136641538	0
136375966	136641538	0
136375966	136642607	1
136375973	136641533	0
136375981	136641539	0
136375986	136641540	0
136375987	136641540	0
136375987	136641540	0
136375987	136641540	0
136375987	136641540	0
136375987	136641539	0
136375987	136641540	0
136375987	136641540	0
136375989	136641538	0
136375991	136641540	0
136375996	136641540	0
136375998	136641540	0
136375998	136641538	0
136375998	136641538	0
136375999	136641540	0
136376006	136641540	0
136376006	136641539	0
136376009	136641540	0
136376014	136641540	0
136376015	136641540	0
136376016	136641540	0
136376017	136641540	0
136376017	136641540	0
136376019	136641538	0
136376025	136641532	0
136376026	136641539	0
136376026	136641538	0
136376026	136641540	0
136376029	136641540	0
136376029	136641540	0
136376031	136641540	0
136376032	136641540	0
136376032	136641540	0
136376032	136641540	0
136376035	136641539	0
136376037	136641532	0
136376040	136641540	0
136376040	136641538	0
136376040	136641540	0
136376041	136641537	0
136376041	136641539	0
136376043	136641538	0
136376043	136641540	0
136376043	136641537	0
136376043	136641539	0
136376044	136641540	0
136376044	136641540	0
136376044	136641540	0
136376046	136641540	0
136376050	136641540	0
136376050	136641540	0
136376050	136641538	0
136376050	136641539	0
136376051	136641540	0
136376051	136641540	0
136376052	136641535	0
136376052	136641540	0
136376052	136641539	0
136376053	136641538	0
136376053	136641540	0
136376053	136641538	0
136376053	136641539	0
136376053	136641540	0
136376053	136641540	0
136376053	136641539	0
136376053	136641540	0
136376053	136641540	0
136376053	136641538	0
136376053	136641540	0
136376053	136641539	0
136376053	136641540	0
136376053	136641540	0
136376053	136641538	0
136376053	136641540	0
136376053	136641540	0
136376053	136641538	0
136376053	136641539	0
136376053	136641540	0
136376053	136641534	0
136376053	136641540	0
136376053	136641540	0
136376053	136641539	0
136376053	136641540	0
136376053	136641540	0
136376053	136641540	0
136376053	136641538	0
136376053	136641540	0
136376053	136641538	0
136376054	136641539	0
136376054	136641532	0
136376054	136641540	0
136376054	136641540	0
136376054	136641539	0
136376054	136641539	0
136376054	136641539	0
136376054	136641539	0
136376055	136641540	0
136376056	136641540	0
136376057	136641540	0
136376057	136641540	0
136376057	136641540	0
136376057	136641540	0
136376057	136641540	0
136376057	136641540	0
136376060	136641539	0
136376060	136641540	0
136376061	136641539	0
136376063	136641540	0
136376063	136641540	0
136376064	136641540	0
136376065	136641538	0
136376066	136641540	0
136376066	136641540	0
136376068	136641540	0
136376069	136641532	0
136376074	136641540	0
136376074	136641539	0
136376076	136641540	0
136376076	136641540	0
136376080	136641539	0
136376083	136641540	0
136376088	136641540	0
136376095	136641539	0
136376095	136641538	0
136376097	136641540	0
136376122	136641539	0
136376306	136641539	2
136376310	136641540	2
136376311	136641538	2
136376328	136641540	2
136376330	136641540	2
136376334	136641538	2
136376334	136641540	2
136376334	136641540	2
136376335	136641540	2
136376335	136641540	2
136376335	136641540	2
136376335	136641540	2
136376335	136641540	2
136376336	136641539	2
136376336	136641540	2
136376337	136641538	2
136376341	136641540	2
136376349	136641539	2
136376354	136641540	2
136376356	136641540	2
136376362	136641539	2
136376363	136641540	2
136376364	136641540	2
136376371	136641540	2
136376371	136641539	2
136376371	136641538	2
136376372	136641538	2
136376372	136641540	2
136376372	136641539	2
136376372	136641540	2
136376372	136641540	2
136376372	136641540	2
136376373	136641540	2
136376373	136641538	2
136376373	136642607	3
136376375	136641539	2
136376376	136642607	3
136376376	136641540	2
136376376	136641538	2
136376376	136641539	2
136376377	136641540	2
136376380	136641532	2
136376384	136641540	2
136376384	136642607	3
136376388	136642606	3
136376389	136641540	2
136376390	136641540	2
136376390	136641539	2
136376391	136641540	2
136376393	136641540	2
136376393	136641540	2
136376393	136641538	2
136376394	136642607	3
136376395	136642606	3
136376396	136641539	2
136376396	136641539	2
136376397	136641540	2
136376397	136642607	3
136376399	136642607	3
136376400	136641540	2
136376400	136642607	3
136376401	136641539	2
136376402	136641540	2
136376403	136641539	2
136376405	136641538	2
136376406	136642607	3
136376406	136641540	2
136376406	136641540	2
136376416	136641538	2
136376416	136642605	3
136376416	136642605	3
136376416	136642605	3
136376416	136641540	2
136376417	136641540	2
136376419	136641539	2
136376419	136641540	2
136376420	136642607	3
136376421	136641538	2
136376422	136642606	3
136376422	136641540	2
136376426	136642607	3
136376426	136642594	3
136376429	136641540	2
136376431	136641538	2
136376432	136642607	3
136376432	136641538	2
136376434	136641540	2
136376442	136642607	3
136376444	136641539	2
136376446	136642606	3
136376446	136641540	2
136376446	136641539	2
136376446	136642605	3
136376446	136642607	3
136376446	136642607	3
136376446	136641540	2
136376446	136641540	2
136376446	136641540	2
136376446	136642607	3
136376447	136641540	2
136376447	136642607	3
136376447	136642607	3
136376447	136641538	2
136376447	136641540	2
136376448	136641540	2
136376449	136641540	2
136376449	136641540	2
136376449	136641538	2
136376449	136641538	2
136376449	136642607	3
136376449	136641538	2
136376449	136641538	2
136376449	136641540	2
136376449	136641538	2
136376449	136641540	2
136376450	136642602	3
136376450	136642602	3
136376450	136641540	2
136376450	136641540	2
136376450	136641540	2
136376450	136641540	2
136376450	136642605	3
136376450	136641540	2
136376450	136641540	2
136376450	136641540	2
136376451	136641540	2
136376451	136641540	2
136376451	136641538	2
136376451	136641540	2
136376451	136641538	2
136376451	136641540	2
136376451	136641540	2
136376451	136641508	2
136376451	136642607	3
136376451	136641540	2
136376451	136641540	2
136376451	136642605	3
136376451	136641540	2
136376451	136641540	2
136376451	136641539	2
136376451	136641538	2
136376451	136641538	2
136376451	136642604	3
136376451	136641541	2
136376451	136641538	2
136376451	136641540	2
136376451	136642607	3
136376451	136641539	2
136376451	136641540	2
136376451	136641539	2
136376451	136641538	2
136376451	136642607	3
136376452	136641538	2
136376459	136641539	2
136376459	136641539	2
136376459	136641540	2
136376459	136641538	2
136376460	136641540	2
136376460	136641540	2
136376460	136641540	2
136376462	136642607	3
136376463	136641540	2
136376465	136641539	2
136376465	136641540	2
136376465	136641540	2
136376466	136641540	2
136376466	136641538	2
136376466	136641540	2
136376468	136641538	2
136376468	136641538	2
136376469	136641540	2
136376469	136641540	2
136376469	136641540	2
136376469	136641540	2
136376469	136642605	3
136376469	136641539	2
136376469	136641540	2
136376469	136641538	2
136376470	136641538	2
136376470	136642607	3
136376470	136641540	2
136376470	136641540	2
136376470	136641539	2
136376470	136641540	2
136376470	136642606	3
136376470	136642607	3
136376470	136641540	2
136376470	136641540	2
136376470	136641540	2
136376470	136641538	2
136376470	136642607	3
136376470	136642607	3
136376470	136641539	2
136376470	136642607	3
136376470	136641540	2
136376470	136642607	3
136376470	136641538	2
136376470	136641540	2
136376470	136641538	2
136376470	136641539	2
136376470	136641540	2
136376471	136642607	3
136376471	136641540	2
136376471	136642607	3
136376471	136642606	3
136376471	136641540	2
136376471	136641538	2
136376471	136641540	2
136376471	136642606	3
136376471	136641540	2
136376471	136641538	2
136376471	136641540	2
136376471	136642605	3
136376471	136641540	2
136376471	136641539	2
136376471	136642607	3
136376471	136641540	2
136376471	136641540	2
136376471	136641540	2
136376471	136641540	2
136376471	136641539	2
136376471	136641540	2
136376471	136642607	3
136376471	136641540	2
136376473	136641540	2
136376474	136641540	2
136376477	136641540	2
136376477	136641540	2
136376477	136642607	3
136376477	136641532	2
136376478	136641540	2
136376478	136641540	2
136376478	136641540	2
136376479	136641538	2
136376479	136641540	2
136376479	136641539	2
136376479	136641540	2
136376479	136641540	2
136376480	136641540	2
136376480	136642605	3
136376484	136642600	3
136376484	136641532	2
136376484	136642599	3
136376485	136641538	2
136376486	136641538	2
136376486	136641540	2
136376486	136641540	2
136376486	136641538	2
136376486	136641538	2
136376486	136642605	3
136376486	136642607	3
136376486	136641540	2
136376488	136641540	2
136376493	136641539	2
136376493	136641540	2
136376497	136641540	2
136376505	136641540	2
136376507	136641540	2
136376507	136641538	2
136376513	136641538	2
136376514	136641540	2
136376516	136641540	2
136376525	136641540	2
136376527	136641540	2
136376527	136641540	2
136376535	136641539	2
136376538	136641538	2
136376541	136641538	2
136376543	136641540	2
136376557	136641538	2
136376558	136641538	2
136376232	136641540	noise
136376465	136642520	noise
136376335	136642607	noise
136375699	136641540	noise
136376423	136641441	noise
136376235	136641538	noise
136375914	136643487	noise
136376065	136643147	noise
136375882	136643479	noise
136376597	136641539	noise
136376549	136643479	noise
136376232	136641538	noise
136376053	136642607	noise
136376053	136642607	noise
136376436	136643487	noise
136376479	136643151	noise
136376367	136642605	noise
136376053	136643479	noise
136376222	136641540	noise
136376054	136642607	noise
136376006	136642607	noise
136375829	136643479	noise
136375479	136641540	noise
136376558	136643479	noise
136376471	136643149	noise
136376234	136641540	noise
136376025	136643487	noise
136376034	136642607	noise
136376537	136643483	noise
136376054	136642605	noise
136376065	136642607	noise
136376023	136642605	noise
136376227	136641538	noise
136375843	136643185	noise
136376061	136642605	noise

## Sheet: figure3D
SSC_Precision	SSC_Recall	SSC_F1score	TssTes_Precision	TssTes_Recall	TssTes_F1score	sample	depth	tools	anno	source
0.974039	0.937	0.95516	0.855576	0.818861	0.836815	mouse_brain_rep1	3M	ISAtools	FullAnno	mouse
0.627074	0.0496714	0.0920511	0.398544	0.0313818	0.0581821	mouse_brain_rep1	3M	IsoQuant	FullAnno	mouse
0.96814	0.896253	0.93081	0.852994	0.785691	0.81796	mouse_brain_rep1	3M	ISAtools	ReduceAnno20	mouse
0.970979	0.630347	0.764433	0.912448	0.590799	0.717211	mouse_brain_rep1	3M	Mandalorion	FullAnno	mouse
0.909966	0.863277	0.886006	0.0152786	0.0144874	0.014872	mouse_brain_rep1	3M	Bambu	FullAnno	mouse
0.96469	0.859334	0.908968	0.85432	0.757244	0.802858	mouse_brain_rep1	3M	ISAtools	ReduceAnno40	mouse
0.912693	0.803713	0.854742	0.135584	0.11904	0.126774	mouse_brain_rep1	3M	Bambu	ReduceAnno20	mouse
0.912959	0.757546	0.828023	0.280523	0.231799	0.253843	mouse_brain_rep1	3M	Bambu	ReduceAnno40	mouse
0.859291	0.187156	0.307366	0.657597	0.142376	0.234072	mouse_brain_rep1	3M	IsoQuant	ReduceAnno20	mouse
0.970918	0.625135	0.76057	0.912514	0.586031	0.713707	mouse_brain_rep1	3M	Mandalorion	ReduceAnno20	mouse
0.914215	0.3153	0.468887	0.712824	0.244384	0.363981	mouse_brain_rep1	3M	IsoQuant	ReduceAnno40	mouse
0.971575	0.460302	0.624659	0.91193	0.431047	0.585393	mouse_brain_rep1	3M	Mandalorion	ReduceAnno40	mouse
0.654575	0.0557593	0.102764	0.440173	0.0372731	0.0687263	mouse_brain_rep1	6M	IsoQuant	FullAnno	mouse
0.975172	0.95102	0.962944	0.913013	0.88637	0.899494	mouse_brain_rep1	6M	ISAtools	FullAnno	mouse
0.969134	0.913755	0.94063	0.907515	0.851825	0.878788	mouse_brain_rep1	6M	ISAtools	ReduceAnno20	mouse
0.96544	0.881241	0.92142	0.905142	0.822437	0.861809	mouse_brain_rep1	6M	ISAtools	ReduceAnno40	mouse
0.865476	0.196725	0.320581	0.681984	0.154112	0.251411	mouse_brain_rep1	6M	IsoQuant	ReduceAnno20	mouse
0.917713	0.328675	0.484005	0.733775	0.261255	0.38532	mouse_brain_rep1	6M	IsoQuant	ReduceAnno40	mouse
0.903746	0.865629	0.884276	0.0142481	0.0136393	0.0139365	mouse_brain_rep1	6M	Bambu	FullAnno	mouse
0.909376	0.810354	0.857013	0.142245	0.126375	0.133841	mouse_brain_rep1	6M	Bambu	ReduceAnno20	mouse
0.911811	0.764626	0.831757	0.292605	0.244338	0.266301	mouse_brain_rep1	6M	Bambu	ReduceAnno40	mouse
0.97106	0.842638	0.902302	0.902246	0.780075	0.836724	mouse_brain_rep1	6M	Mandalorion	FullAnno	mouse
0.970877	0.833322	0.896855	0.902485	0.7718	0.832042	mouse_brain_rep1	6M	Mandalorion	ReduceAnno20	mouse
0.970884	0.818932	0.888458	0.902468	0.758504	0.824247	mouse_brain_rep1	6M	Mandalorion	ReduceAnno40	mouse
0.652574	0.0573043	0.105357	0.428309	0.0373877	0.068772	mouse_brain_rep1	12M	IsoQuant	FullAnno	mouse
0.97509	0.951435	0.963117	0.924777	0.898978	0.911694	mouse_brain_rep1	12M	ISAtools	FullAnno	mouse
0.968961	0.91424	0.940805	0.918759	0.863791	0.890427	mouse_brain_rep1	12M	ISAtools	ReduceAnno20	mouse
0.965459	0.881748	0.921706	0.916568	0.833807	0.87323	mouse_brain_rep1	12M	ISAtools	ReduceAnno40	mouse
0.901378	0.867289	0.884005	0.0142316	0.0136851	0.0139525	mouse_brain_rep1	12M	Bambu	FullAnno	mouse
0.862753	0.197579	0.321525	0.673613	0.153379	0.249864	mouse_brain_rep1	12M	IsoQuant	ReduceAnno20	mouse
0.906822	0.810169	0.855775	0.141596	0.126123	0.133412	mouse_brain_rep1	12M	Bambu	ReduceAnno20	mouse
0.909822	0.764741	0.830996	0.2951	0.246997	0.268914	mouse_brain_rep1	12M	Bambu	ReduceAnno40	mouse
0.969346	0.870679	0.917367	0.927056	0.830598	0.87618	mouse_brain_rep1	12M	Mandalorion	FullAnno	mouse
0.915977	0.329067	0.484188	0.723941	0.25855	0.381021	mouse_brain_rep1	12M	IsoQuant	ReduceAnno40	mouse
0.969585	0.861547	0.912378	0.927073	0.821772	0.871252	mouse_brain_rep1	12M	Mandalorion	ReduceAnno20	mouse
0.968729	0.846512	0.903506	0.926006	0.807262	0.862566	mouse_brain_rep1	12M	Mandalorion	ReduceAnno40	mouse
0.63944	0.05795	0.106269	0.407379	0.0367	0.0673338	mouse_brain_rep1	20M	IsoQuant	FullAnno	mouse
0.856171	0.197394	0.320821	0.6585	0.150949	0.245599	mouse_brain_rep1	20M	IsoQuant	ReduceAnno20	mouse
0.972229	0.951804	0.961908	0.925332	0.903081	0.91407	mouse_brain_rep1	20M	ISAtools	FullAnno	mouse
0.966018	0.91447	0.939537	0.919221	0.867596	0.892662	mouse_brain_rep1	20M	ISAtools	ReduceAnno20	mouse
0.961818	0.881794	0.920069	0.916123	0.836993	0.874772	mouse_brain_rep1	20M	ISAtools	ReduceAnno40	mouse
0.911946	0.328145	0.482626	0.715091	0.2558	0.376808	mouse_brain_rep1	20M	IsoQuant	ReduceAnno40	mouse
0.899287	0.869134	0.883953	0.0134093	0.0129516	0.013176	mouse_brain_rep1	20M	Bambu	FullAnno	mouse
0.904565	0.811553	0.855538	0.140825	0.125963	0.13298	mouse_brain_rep1	20M	Bambu	ReduceAnno20	mouse
0.907843	0.763957	0.829708	0.293949	0.246309	0.268028	mouse_brain_rep1	20M	Bambu	ReduceAnno40	mouse
0.970187	0.871994	0.918473	0.933113	0.835297	0.881499	mouse_brain_rep1	20M	Mandalorion	FullAnno	mouse
0.970246	0.862493	0.913201	0.933145	0.826128	0.876381	mouse_brain_rep1	20M	Mandalorion	ReduceAnno20	mouse
0.968664	0.84755	0.904068	0.931343	0.811595	0.867355	mouse_brain_rep1	20M	Mandalorion	ReduceAnno40	mouse
0.976208	0.954077	0.965015	0.931659	0.907603	0.919473	mouse_brain_rep2	20M	ISAtools	FullAnno	mouse
0.971323	0.918706	0.944281	0.926884	0.873938	0.899632	mouse_brain_rep2	20M	ISAtools	ReduceAnno20	mouse
0.635196	0.0575361	0.105515	0.412291	0.0371097	0.0680905	mouse_brain_rep2	20M	IsoQuant	FullAnno	mouse
0.966472	0.888343	0.925762	0.923049	0.845351	0.882493	mouse_brain_rep2	20M	ISAtools	ReduceAnno40	mouse
0.904197	0.87544	0.889585	0.0126543	0.0122442	0.0124454	mouse_brain_rep2	20M	Bambu	FullAnno	mouse
0.857299	0.198062	0.321782	0.66214	0.152009	0.247255	mouse_brain_rep2	20M	IsoQuant	ReduceAnno20	mouse
0.909648	0.814893	0.859667	0.139327	0.124453	0.13147	mouse_brain_rep2	20M	Bambu	ReduceAnno20	mouse
0.910515	0.766414	0.832273	0.291685	0.244406	0.26596	mouse_brain_rep2	20M	Bambu	ReduceAnno40	mouse
0.971109	0.876831	0.921565	0.936857	0.842309	0.88707	mouse_brain_rep2	20M	Mandalorion	FullAnno	mouse
0.912455	0.330694	0.485449	0.715044	0.25753	0.378676	mouse_brain_rep2	20M	IsoQuant	ReduceAnno40	mouse
0.97132	0.867191	0.916306	0.937042	0.832981	0.881952	mouse_brain_rep2	20M	Mandalorion	ReduceAnno20	mouse
0.970689	0.853832	0.908518	0.93585	0.819757	0.873964	mouse_brain_rep2	20M	Mandalorion	ReduceAnno40	mouse
0.975023	0.955089	0.964953	0.926771	0.904309	0.915402	mouse_brain_rep2	12M	ISAtools	FullAnno	mouse
0.969796	0.919616	0.944039	0.921892	0.870946	0.895694	mouse_brain_rep2	12M	ISAtools	ReduceAnno20	mouse
0.964343	0.889558	0.925441	0.917454	0.842787	0.878536	mouse_brain_rep2	12M	ISAtools	ReduceAnno40	mouse
0.641004	0.0568783	0.104485	0.421728	0.0371851	0.0683439	mouse_brain_rep2	12M	IsoQuant	FullAnno	mouse
0.861004	0.198264	0.32231	0.669377	0.153165	0.249289	mouse_brain_rep2	12M	IsoQuant	ReduceAnno20	mouse
0.906283	0.875212	0.890476	0.0138585	0.0133756	0.0136123	mouse_brain_rep2	12M	Bambu	FullAnno	mouse
0.91432	0.331022	0.486067	0.721523	0.259592	0.381813	mouse_brain_rep2	12M	IsoQuant	ReduceAnno40	mouse
0.910871	0.81426	0.85986	0.13911	0.124001	0.131121	mouse_brain_rep2	12M	Bambu	ReduceAnno20	mouse
0.911704	0.764694	0.831753	0.289771	0.241942	0.263705	mouse_brain_rep2	12M	Bambu	ReduceAnno40	mouse
0.971738	0.875161	0.920924	0.931307	0.836476	0.881347	mouse_brain_rep2	12M	Mandalorion	FullAnno	mouse
0.97141	0.865698	0.915512	0.930744	0.827148	0.875893	mouse_brain_rep2	12M	Mandalorion	ReduceAnno20	mouse
0.971134	0.852086	0.907723	0.930466	0.814175	0.868444	mouse_brain_rep2	12M	Mandalorion	ReduceAnno40	mouse
0.975508	0.95433	0.964802	0.916301	0.892065	0.90402	mouse_brain_rep2	6M	ISAtools	FullAnno	mouse
0.970243	0.919009	0.943931	0.911462	0.859305	0.884615	mouse_brain_rep2	6M	ISAtools	ReduceAnno20	mouse
0.965698	0.888976	0.92575	0.908163	0.8319	0.86836	mouse_brain_rep2	6M	ISAtools	ReduceAnno40	mouse
0.638938	0.0548035	0.100948	0.434218	0.0370091	0.0682048	mouse_brain_rep2	6M	IsoQuant	FullAnno	mouse
0.862414	0.196341	0.319861	0.680151	0.153869	0.250963	mouse_brain_rep2	6M	IsoQuant	ReduceAnno20	mouse
0.916205	0.330314	0.485568	0.730035	0.261553	0.385125	mouse_brain_rep2	6M	IsoQuant	ReduceAnno40	mouse
0.908883	0.873491	0.890835	0.0141092	0.0135516	0.0138243	mouse_brain_rep2	6M	Bambu	FullAnno	mouse
0.912418	0.811856	0.859204	0.137263	0.121788	0.129063	mouse_brain_rep2	6M	Bambu	ReduceAnno20	mouse
0.914919	0.763733	0.832517	0.287404	0.238824	0.260871	mouse_brain_rep2	6M	Bambu	ReduceAnno40	mouse
0.972329	0.845508	0.904494	0.90669	0.785438	0.841719	mouse_brain_rep2	6M	Mandalorion	FullAnno	mouse
0.972265	0.836399	0.899228	0.906944	0.777267	0.837112	mouse_brain_rep2	6M	Mandalorion	ReduceAnno20	mouse
0.972698	0.823014	0.891617	0.907293	0.764746	0.829943	mouse_brain_rep2	6M	Mandalorion	ReduceAnno40	mouse
0.974826	0.940592	0.957402	0.858146	0.823453	0.840441	mouse_brain_rep2	3M	ISAtools	FullAnno	mouse
0.970049	0.901424	0.934478	0.857108	0.792201	0.823377	mouse_brain_rep2	3M	ISAtools	ReduceAnno20	mouse
0.965636	0.868102	0.914275	0.85691	0.766078	0.808952	mouse_brain_rep2	3M	ISAtools	ReduceAnno40	mouse
0.612532	0.0484781	0.0898454	0.396419	0.0311761	0.057806	mouse_brain_rep2	3M	IsoQuant	FullAnno	mouse
0.855446	0.185816	0.305313	0.660221	0.142505	0.234413	mouse_brain_rep2	3M	IsoQuant	ReduceAnno20	mouse
0.912149	0.316297	0.469715	0.71093	0.244984	0.364398	mouse_brain_rep2	3M	IsoQuant	ReduceAnno40	mouse
0.915314	0.870177	0.892174	0.0155849	0.0148087	0.0151864	mouse_brain_rep2	3M	Bambu	FullAnno	mouse
0.916839	0.805885	0.857789	0.132289	0.115955	0.123584	mouse_brain_rep2	3M	Bambu	ReduceAnno20	mouse
0.916907	0.755509	0.82842	0.274912	0.225499	0.247765	mouse_brain_rep2	3M	Bambu	ReduceAnno40	mouse
0.974436	0.631708	0.766505	0.920232	0.594886	0.722627	mouse_brain_rep2	3M	Mandalorion	FullAnno	mouse
0.974463	0.626597	0.762739	0.920209	0.590059	0.719047	mouse_brain_rep2	3M	Mandalorion	ReduceAnno20	mouse
0.975213	0.618172	0.756689	0.921257	0.582416	0.713658	mouse_brain_rep2	3M	Mandalorion	ReduceAnno40	mouse
0.979864	0.953715	0.966612	0.898224	0.869795	0.883781	mouse_heart_rep1	3M	ISAtools	FullAnno	mouse
0.974219	0.920407	0.946548	0.893498	0.839865	0.865851	mouse_heart_rep1	3M	ISAtools	ReduceAnno20	mouse
0.970468	0.892257	0.92972	0.892931	0.816682	0.853105	mouse_heart_rep1	3M	ISAtools	ReduceAnno40	mouse
0.629823	0.0521412	0.0963091	0.426447	0.0350895	0.0648433	mouse_heart_rep1	3M	IsoQuant	FullAnno	mouse
0.860686	0.19632	0.319714	0.682713	0.154777	0.252345	mouse_heart_rep1	3M	IsoQuant	ReduceAnno20	mouse
0.920651	0.337038	0.493435	0.736502	0.267983	0.392977	mouse_heart_rep1	3M	IsoQuant	ReduceAnno40	mouse
0.916652	0.881576	0.898771	0.0162073	0.0155769	0.0158854	mouse_heart_rep1	3M	Bambu	FullAnno	mouse
0.91718	0.818055	0.864785	0.134764	0.11982	0.126853	mouse_heart_rep1	3M	Bambu	ReduceAnno20	mouse
0.921251	0.760623	0.833266	0.274691	0.225816	0.247867	mouse_heart_rep1	3M	Bambu	ReduceAnno40	mouse
0.977282	0.719995	0.829137	0.919591	0.675894	0.779131	mouse_heart_rep1	3M	Mandalorion	FullAnno	mouse
0.97737	0.712807	0.824382	0.919742	0.669312	0.774793	mouse_heart_rep1	3M	Mandalorion	ReduceAnno20	mouse
0.977912	0.702692	0.817766	0.92093	0.660218	0.769079	mouse_heart_rep1	3M	Mandalorion	ReduceAnno40	mouse
0.977123	0.959305	0.968131	0.923262	0.902437	0.91273	mouse_heart_rep1	6M	ISAtools	FullAnno	mouse
0.972009	0.926696	0.948811	0.918438	0.871813	0.894518	mouse_heart_rep1	6M	ISAtools	ReduceAnno20	mouse
0.967932	0.89991	0.932682	0.916518	0.848166	0.881018	mouse_heart_rep1	6M	ISAtools	ReduceAnno40	mouse
0.64374	0.0554354	0.10208	0.431221	0.0369084	0.0679968	mouse_heart_rep1	6M	IsoQuant	FullAnno	mouse
0.860659	0.198949	0.323189	0.687059	0.157853	0.256723	mouse_heart_rep1	6M	IsoQuant	ReduceAnno20	mouse
0.919321	0.338968	0.495308	0.739578	0.271059	0.396718	mouse_heart_rep1	6M	IsoQuant	ReduceAnno40	mouse
0.913091	0.882374	0.89747	0.0159573	0.0154116	0.0156792	mouse_heart_rep1	6M	Bambu	FullAnno	mouse
0.913617	0.818221	0.863291	0.13547	0.120945	0.127795	mouse_heart_rep1	6M	Bambu	ReduceAnno20	mouse
0.91727	0.767012	0.835438	0.282701	0.235374	0.256875	mouse_heart_rep1	6M	Bambu	ReduceAnno40	mouse
0.973836	0.859515	0.913111	0.912345	0.802394	0.853844	mouse_heart_rep1	6M	Mandalorion	FullAnno	mouse
0.973998	0.850065	0.907821	0.912756	0.79373	0.849091	mouse_heart_rep1	6M	Mandalorion	ReduceAnno20	mouse
0.97376	0.835956	0.899611	0.912433	0.780534	0.841345	mouse_heart_rep1	6M	Mandalorion	ReduceAnno40	mouse
0.978836	0.960303	0.969481	0.936764	0.915666	0.926095	mouse_heart_rep1	12M	ISAtools	FullAnno	mouse
0.973367	0.927894	0.950086	0.9313	0.884545	0.90732	mouse_heart_rep1	12M	ISAtools	ReduceAnno20	mouse
0.969888	0.901341	0.934358	0.929934	0.860767	0.894014	mouse_heart_rep1	12M	ISAtools	ReduceAnno40	mouse
0.648618	0.0577979	0.106138	0.426064	0.0377352	0.0693299	mouse_heart_rep1	12M	IsoQuant	FullAnno	mouse
0.910038	0.883572	0.896609	0.014963	0.0145186	0.014737	mouse_heart_rep1	12M	Bambu	FullAnno	mouse
0.860942	0.202509	0.327892	0.676899	0.15825	0.256527	mouse_heart_rep1	12M	IsoQuant	ReduceAnno20	mouse
0.910697	0.818121	0.86193	0.135904	0.121705	0.128413	mouse_heart_rep1	12M	Bambu	ReduceAnno20	mouse
0.91636	0.762287	0.832252	0.282132	0.233687	0.255634	mouse_heart_rep1	12M	Bambu	ReduceAnno40	mouse
0.919254	0.342828	0.499406	0.736373	0.272977	0.398301	mouse_heart_rep1	12M	IsoQuant	ReduceAnno40	mouse
0.97272	0.892224	0.930734	0.939875	0.859741	0.898024	mouse_heart_rep1	12M	Mandalorion	FullAnno	mouse
0.972738	0.882142	0.925227	0.939729	0.849787	0.892497	mouse_heart_rep1	12M	Mandalorion	ReduceAnno20	mouse
0.971495	0.867534	0.916575	0.938317	0.835632	0.884002	mouse_heart_rep1	12M	Mandalorion	ReduceAnno40	mouse
0.978383	0.959339	0.968767	0.939204	0.918114	0.928539	mouse_heart_rep1	20M	ISAtools	FullAnno	mouse
0.97334	0.926929	0.949567	0.934195	0.886894	0.909929	mouse_heart_rep1	20M	ISAtools	ReduceAnno20	mouse
0.969569	0.900077	0.933531	0.932402	0.862619	0.896153	mouse_heart_rep1	20M	ISAtools	ReduceAnno40	mouse
0.640699	0.0585632	0.107317	0.407718	0.0370407	0.0679116	mouse_heart_rep1	20M	IsoQuant	FullAnno	mouse
0.856239	0.202742	0.327854	0.665168	0.156563	0.253467	mouse_heart_rep1	20M	IsoQuant	ReduceAnno20	mouse
0.915709	0.341963	0.497965	0.725523	0.269339	0.392841	mouse_heart_rep1	20M	IsoQuant	ReduceAnno40	mouse
0.907878	0.883107	0.89532	0.0136763	0.013295	0.0134824	mouse_heart_rep1	20M	Bambu	FullAnno	mouse
0.908835	0.817689	0.860856	0.135403	0.121441	0.128042	mouse_heart_rep1	20M	Bambu	ReduceAnno20	mouse
0.915075	0.762253	0.831702	0.283362	0.235043	0.25695	mouse_heart_rep1	20M	Bambu	ReduceAnno40	mouse
0.9725	0.893122	0.931122	0.944436	0.863445	0.902126	mouse_heart_rep1	20M	Mandalorion	FullAnno	mouse
0.972584	0.88294	0.925596	0.944087	0.853259	0.896378	mouse_heart_rep1	20M	Mandalorion	ReduceAnno20	mouse
0.970209	0.868	0.916262	0.941786	0.838939	0.887392	mouse_heart_rep1	20M	Mandalorion	ReduceAnno40	mouse
0.637222	0.0539245	0.0994344	0.415251	0.0349229	0.0644272	mouse_heart_rep2	3M	IsoQuant	FullAnno	mouse
0.861061	0.196595	0.320104	0.668672	0.151724	0.247328	mouse_heart_rep2	3M	IsoQuant	ReduceAnno20	mouse
0.917226	0.336294	0.492145	0.724081	0.263858	0.386774	mouse_heart_rep2	3M	IsoQuant	ReduceAnno40	mouse
0.916891	0.881098	0.898638	0.017124	0.0164455	0.0167774	mouse_heart_rep2	3M	Bambu	FullAnno	mouse
0.917028	0.817717	0.864529	0.133314	0.118484	0.125462	mouse_heart_rep2	3M	Bambu	ReduceAnno20	mouse
0.920275	0.764432	0.835145	0.277104	0.229157	0.25086	mouse_heart_rep2	3M	Bambu	ReduceAnno40	mouse
0.979508	0.954381	0.966781	0.894446	0.867071	0.880545	mouse_heart_rep2	3M	ISAtools	FullAnno	mouse
0.9735	0.920072	0.946032	0.890435	0.83726	0.863028	mouse_heart_rep2	3M	ISAtools	ReduceAnno20	mouse
0.970956	0.891736	0.92966	0.890457	0.813448	0.850212	mouse_heart_rep2	3M	ISAtools	ReduceAnno40	mouse
0.977296	0.716417	0.826764	0.919331	0.671884	0.776367	mouse_heart_rep2	3M	Mandalorion	FullAnno	mouse
0.977482	0.709996	0.822538	0.919897	0.666106	0.772695	mouse_heart_rep2	3M	Mandalorion	ReduceAnno20	mouse
0.977772	0.699805	0.815759	0.920052	0.65655	0.76628	mouse_heart_rep2	3M	Mandalorion	ReduceAnno40	mouse
0.640474	0.0552024	0.101644	0.431431	0.0369547	0.068078	mouse_heart_rep2	6M	IsoQuant	FullAnno	mouse
0.860523	0.197489	0.321251	0.677617	0.154549	0.251693	mouse_heart_rep2	6M	IsoQuant	ReduceAnno20	mouse
0.916703	0.336805	0.492617	0.731589	0.267128	0.391358	mouse_heart_rep2	6M	IsoQuant	ReduceAnno40	mouse
0.977422	0.95978	0.96852	0.92175	0.900914	0.911213	mouse_heart_rep2	6M	ISAtools	FullAnno	mouse
0.971367	0.92662	0.948466	0.916109	0.869865	0.892388	mouse_heart_rep2	6M	ISAtools	ReduceAnno20	mouse
0.968423	0.899403	0.932637	0.915396	0.846054	0.879359	mouse_heart_rep2	6M	ISAtools	ReduceAnno40	mouse
0.912775	0.879213	0.895679	0.0147088	0.0141596	0.0144285	mouse_heart_rep2	6M	Bambu	FullAnno	mouse
0.914774	0.818132	0.863758	0.135098	0.12042	0.127337	mouse_heart_rep2	6M	Bambu	ReduceAnno20	mouse
0.916851	0.767562	0.83559	0.283342	0.236142	0.257597	mouse_heart_rep2	6M	Bambu	ReduceAnno40	mouse
0.975402	0.85634	0.912001	0.912242	0.797987	0.851298	mouse_heart_rep2	6M	Mandalorion	FullAnno	mouse
0.975907	0.847555	0.907213	0.91271	0.789733	0.846779	mouse_heart_rep2	6M	Mandalorion	ReduceAnno20	mouse
0.975659	0.833594	0.899049	0.912461	0.776684	0.839115	mouse_heart_rep2	6M	Mandalorion	ReduceAnno40	mouse
0.978749	0.959301	0.968927	0.935263	0.913201	0.9241	mouse_heart_rep2	12M	ISAtools	FullAnno	mouse
0.972818	0.926077	0.948872	0.929461	0.881421	0.904803	mouse_heart_rep2	12M	ISAtools	ReduceAnno20	mouse
0.96926	0.898508	0.932544	0.92778	0.856499	0.890715	mouse_heart_rep2	12M	ISAtools	ReduceAnno40	mouse
0.646454	0.0582372	0.106849	0.418794	0.0374944	0.0688267	mouse_heart_rep2	12M	IsoQuant	FullAnno	mouse
0.859817	0.201035	0.325876	0.667031	0.154994	0.251539	mouse_heart_rep2	12M	IsoQuant	ReduceAnno20	mouse
0.915971	0.339872	0.495782	0.72458	0.267192	0.390415	mouse_heart_rep2	12M	IsoQuant	ReduceAnno40	mouse
0.910315	0.881002	0.895418	0.0147368	0.0142549	0.0144913	mouse_heart_rep2	12M	Bambu	FullAnno	mouse
0.911707	0.818739	0.862725	0.136244	0.121944	0.128698	mouse_heart_rep2	12M	Bambu	ReduceAnno20	mouse
0.91564	0.766987	0.834747	0.286726	0.239126	0.260771	mouse_heart_rep2	12M	Bambu	ReduceAnno40	mouse
0.973981	0.889723	0.929947	0.939759	0.855832	0.895834	mouse_heart_rep2	12M	Mandalorion	FullAnno	mouse
0.973786	0.880523	0.924808	0.939213	0.846657	0.890536	mouse_heart_rep2	12M	Mandalorion	ReduceAnno20	mouse
0.972919	0.866498	0.91663	0.938217	0.833101	0.882539	mouse_heart_rep2	12M	Mandalorion	ReduceAnno40	mouse
0.979241	0.958407	0.968711	0.938702	0.915963	0.927192	mouse_heart_rep2	20M	ISAtools	FullAnno	mouse
0.97387	0.925119	0.948868	0.933094	0.88377	0.907762	mouse_heart_rep2	20M	ISAtools	ReduceAnno20	mouse
0.970903	0.89755	0.932786	0.932049	0.858753	0.893901	mouse_heart_rep2	20M	ISAtools	ReduceAnno40	mouse
0.643884	0.0586845	0.107565	0.407641	0.036923	0.0677126	mouse_heart_rep2	20M	IsoQuant	FullAnno	mouse
0.858682	0.201099	0.325878	0.659255	0.153438	0.248937	mouse_heart_rep2	20M	IsoQuant	ReduceAnno20	mouse
0.915595	0.338913	0.494707	0.717898	0.264112	0.386158	mouse_heart_rep2	20M	IsoQuant	ReduceAnno40	mouse
0.90763	0.880491	0.893854	0.0134914	0.0130802	0.0132821	mouse_heart_rep2	20M	Bambu	FullAnno	mouse
0.909851	0.817334	0.861114	0.134889	0.12077	0.127439	mouse_heart_rep2	20M	Bambu	ReduceAnno20	mouse
0.914497	0.765358	0.833307	0.286558	0.238777	0.260494	mouse_heart_rep2	20M	Bambu	ReduceAnno40	mouse
0.972618	0.890745	0.929882	0.943506	0.860023	0.899832	mouse_heart_rep2	20M	Mandalorion	FullAnno	mouse
0.972381	0.881769	0.92486	0.942985	0.851165	0.894725	mouse_heart_rep2	20M	Mandalorion	ReduceAnno20	mouse
0.971571	0.867936	0.916833	0.941945	0.837577	0.8867	mouse_heart_rep2	20M	Mandalorion	ReduceAnno40	mouse

## Sheet: figure4
source	sample	depth	anno	tools	metrics	values	tools_anno
mouse	mouse_heart_rep2	20M	NoAnno	Bambu	CCC.est	0.993473	Bambu(NoAnno)
mouse	mouse_heart_rep2	20M	NoAnno	Bambu	NRMSE	0.039305	Bambu(NoAnno)
mouse	mouse_heart_rep2	20M	NoAnno	Bambu	Pearson	0.993558	Bambu(NoAnno)
mouse	mouse_heart_rep2	20M	NoAnno	Bambu	Spearman	0.987826	Bambu(NoAnno)
mouse	mouse_brain_rep2	20M	NoAnno	Bambu	CCC.est	0.993067	Bambu(NoAnno)
mouse	mouse_brain_rep2	20M	NoAnno	Bambu	NRMSE	0.0399198	Bambu(NoAnno)
mouse	mouse_brain_rep2	20M	NoAnno	Bambu	Pearson	0.993162	Bambu(NoAnno)
mouse	mouse_brain_rep2	20M	NoAnno	Bambu	Spearman	0.989417	Bambu(NoAnno)
mouse	mouse_heart_rep1	20M	NoAnno	Bambu	CCC.est	0.993183	Bambu(NoAnno)
mouse	mouse_heart_rep1	20M	NoAnno	Bambu	NRMSE	0.0401856	Bambu(NoAnno)
mouse	mouse_heart_rep1	20M	NoAnno	Bambu	Pearson	0.993283	Bambu(NoAnno)
mouse	mouse_heart_rep1	20M	NoAnno	Bambu	Spearman	0.987839	Bambu(NoAnno)
mouse	mouse_brain_rep1	20M	NoAnno	Bambu	CCC.est	0.992774	Bambu(NoAnno)
mouse	mouse_brain_rep1	20M	NoAnno	Bambu	NRMSE	0.0407552	Bambu(NoAnno)
mouse	mouse_brain_rep1	20M	NoAnno	Bambu	Pearson	0.992859	Bambu(NoAnno)
mouse	mouse_brain_rep1	20M	NoAnno	Bambu	Spearman	0.989399	Bambu(NoAnno)
human	human_brain_rep2	20M	ReduceAnno40	ISAtools	CCC.est	0.986331	ISAtools(ReduceAnno40)
human	human_brain_rep2	20M	ReduceAnno40	ISAtools	NRMSE	0.0596769	ISAtools(ReduceAnno40)
human	human_brain_rep2	20M	ReduceAnno40	ISAtools	Pearson	0.987857	ISAtools(ReduceAnno40)
human	human_brain_rep2	20M	ReduceAnno40	ISAtools	Spearman	0.969213	ISAtools(ReduceAnno40)
human	human_brain_rep2	20M	ReduceAnno20	ISAtools	CCC.est	0.986359	ISAtools(ReduceAnno20)
human	human_brain_rep2	20M	ReduceAnno20	ISAtools	NRMSE	0.0594079	ISAtools(ReduceAnno20)
human	human_brain_rep2	20M	ReduceAnno20	ISAtools	Pearson	0.987936	ISAtools(ReduceAnno20)
human	human_brain_rep2	20M	ReduceAnno20	ISAtools	Spearman	0.968918	ISAtools(ReduceAnno20)
human	human_brain_rep2	12M	ReduceAnno40	ISAtools	CCC.est	0.986773	ISAtools(ReduceAnno40)
human	human_brain_rep2	12M	ReduceAnno40	ISAtools	NRMSE	0.0655154	ISAtools(ReduceAnno40)
human	human_brain_rep2	12M	ReduceAnno40	ISAtools	Pearson	0.98822	ISAtools(ReduceAnno40)
human	human_brain_rep2	12M	ReduceAnno40	ISAtools	Spearman	0.971249	ISAtools(ReduceAnno40)
human	human_brain_rep2	12M	ReduceAnno20	ISAtools	CCC.est	0.986718	ISAtools(ReduceAnno20)
human	human_brain_rep2	12M	ReduceAnno20	ISAtools	NRMSE	0.0654537	ISAtools(ReduceAnno20)
human	human_brain_rep2	12M	ReduceAnno20	ISAtools	Pearson	0.988238	ISAtools(ReduceAnno20)
human	human_brain_rep2	12M	ReduceAnno20	ISAtools	Spearman	0.971092	ISAtools(ReduceAnno20)
mouse	mouse_heart_rep2	12M	NoAnno	Bambu	CCC.est	0.993405	Bambu(NoAnno)
mouse	mouse_heart_rep2	12M	NoAnno	Bambu	NRMSE	0.0436096	Bambu(NoAnno)
mouse	mouse_heart_rep2	12M	NoAnno	Bambu	Pearson	0.993491	Bambu(NoAnno)
mouse	mouse_heart_rep2	12M	NoAnno	Bambu	Spearman	0.988464	Bambu(NoAnno)
human	human_brain_rep2	20M	NoAnno	ISAtools	CCC.est	0.987143	ISAtools(NoAnno)
human	human_brain_rep2	20M	NoAnno	ISAtools	NRMSE	0.0583827	ISAtools(NoAnno)
human	human_brain_rep2	20M	NoAnno	ISAtools	Pearson	0.988581	ISAtools(NoAnno)
human	human_brain_rep2	20M	NoAnno	ISAtools	Spearman	0.970136	ISAtools(NoAnno)
human	human_brain_rep2	6M	ReduceAnno20	ISAtools	CCC.est	0.987738	ISAtools(ReduceAnno20)
human	human_brain_rep2	6M	ReduceAnno20	ISAtools	NRMSE	0.074839	ISAtools(ReduceAnno20)
human	human_brain_rep2	6M	ReduceAnno20	ISAtools	Pearson	0.988962	ISAtools(ReduceAnno20)
human	human_brain_rep2	6M	ReduceAnno20	ISAtools	Spearman	0.97502	ISAtools(ReduceAnno20)
mouse	mouse_brain_rep2	12M	NoAnno	Bambu	CCC.est	0.993022	Bambu(NoAnno)
mouse	mouse_brain_rep2	12M	NoAnno	Bambu	NRMSE	0.0443751	Bambu(NoAnno)
mouse	mouse_brain_rep2	12M	NoAnno	Bambu	Pearson	0.993116	Bambu(NoAnno)
mouse	mouse_brain_rep2	12M	NoAnno	Bambu	Spearman	0.990399	Bambu(NoAnno)
mouse	mouse_heart_rep1	12M	NoAnno	Bambu	CCC.est	0.993155	Bambu(NoAnno)
mouse	mouse_heart_rep1	12M	NoAnno	Bambu	NRMSE	0.044429	Bambu(NoAnno)
mouse	mouse_heart_rep1	12M	NoAnno	Bambu	Pearson	0.993252	Bambu(NoAnno)
mouse	mouse_heart_rep1	12M	NoAnno	Bambu	Spearman	0.988169	Bambu(NoAnno)
human	human_brain_rep2	12M	NoAnno	ISAtools	CCC.est	0.987731	ISAtools(NoAnno)
human	human_brain_rep2	12M	NoAnno	ISAtools	NRMSE	0.0635529	ISAtools(NoAnno)
human	human_brain_rep2	12M	NoAnno	ISAtools	Pearson	0.989052	ISAtools(NoAnno)
human	human_brain_rep2	12M	NoAnno	ISAtools	Spearman	0.971814	ISAtools(NoAnno)
mouse	mouse_brain_rep1	12M	NoAnno	Bambu	CCC.est	0.992751	Bambu(NoAnno)
mouse	mouse_brain_rep1	12M	NoAnno	Bambu	NRMSE	0.0448594	Bambu(NoAnno)
mouse	mouse_brain_rep1	12M	NoAnno	Bambu	Pearson	0.992831	Bambu(NoAnno)
mouse	mouse_brain_rep1	12M	NoAnno	Bambu	Spearman	0.989639	Bambu(NoAnno)
human	human_brain_rep2	6M	ReduceAnno40	ISAtools	CCC.est	0.987995	ISAtools(ReduceAnno40)
human	human_brain_rep2	6M	ReduceAnno40	ISAtools	NRMSE	0.0741552	ISAtools(ReduceAnno40)
human	human_brain_rep2	6M	ReduceAnno40	ISAtools	Pearson	0.989108	ISAtools(ReduceAnno40)
human	human_brain_rep2	6M	ReduceAnno40	ISAtools	Spearman	0.975198	ISAtools(ReduceAnno40)
human	human_brain_rep2	20M	FullAnno	ISAtools	CCC.est	0.987841	ISAtools(FullAnno)
human	human_brain_rep2	20M	FullAnno	ISAtools	NRMSE	0.0559309	ISAtools(FullAnno)
human	human_brain_rep2	20M	FullAnno	ISAtools	Pearson	0.989674	ISAtools(FullAnno)
human	human_brain_rep2	20M	FullAnno	ISAtools	Spearman	0.970738	ISAtools(FullAnno)
human	human_brain_rep2	20M	FullAnno	IsoQuant	CCC.est	0.986626	IsoQuant(FullAnno)
human	human_brain_rep2	20M	FullAnno	IsoQuant	NRMSE	0.0584004	IsoQuant(FullAnno)
human	human_brain_rep2	20M	FullAnno	IsoQuant	Pearson	0.986867	IsoQuant(FullAnno)
human	human_brain_rep2	20M	FullAnno	IsoQuant	Spearman	0.976705	IsoQuant(FullAnno)
human	human_heart_rep2	20M	FullAnno	IsoQuant	CCC.est	0.985174	IsoQuant(FullAnno)
human	human_heart_rep2	20M	FullAnno	IsoQuant	NRMSE	0.0653917	IsoQuant(FullAnno)
human	human_heart_rep2	20M	FullAnno	IsoQuant	Pearson	0.9854	IsoQuant(FullAnno)
human	human_heart_rep2	20M	FullAnno	IsoQuant	Spearman	0.977857	IsoQuant(FullAnno)
mouse	mouse_brain_rep1	12M	FullAnno	Bambu	CCC.est	0.993069	Bambu(FullAnno)
mouse	mouse_brain_rep1	12M	FullAnno	Bambu	NRMSE	0.0458973	Bambu(FullAnno)
mouse	mouse_brain_rep1	12M	FullAnno	Bambu	Pearson	0.993158	Bambu(FullAnno)
mouse	mouse_brain_rep1	12M	FullAnno	Bambu	Spearman	0.987042	Bambu(FullAnno)
human	human_brain_rep1	3M	FullAnno	Mandalorion	CCC.est	0.981292	Mandalorion(FullAnno)
human	human_brain_rep1	3M	FullAnno	Mandalorion	NRMSE	0.0839187	Mandalorion(FullAnno)
human	human_brain_rep1	3M	FullAnno	Mandalorion	Pearson	0.991401	Mandalorion(FullAnno)
human	human_brain_rep1	3M	FullAnno	Mandalorion	Spearman	0.978511	Mandalorion(FullAnno)
human	human_heart_rep2	20M	ReduceAnno20	IsoQuant	CCC.est	0.985036	IsoQuant(ReduceAnno20)
human	human_heart_rep2	20M	ReduceAnno20	IsoQuant	NRMSE	0.0656754	IsoQuant(ReduceAnno20)
human	human_heart_rep2	20M	ReduceAnno20	IsoQuant	Pearson	0.985144	IsoQuant(ReduceAnno20)
human	human_heart_rep2	20M	ReduceAnno20	IsoQuant	Spearman	0.978172	IsoQuant(ReduceAnno20)
human	human_brain_rep2	20M	ReduceAnno20	IsoQuant	CCC.est	0.987729	IsoQuant(ReduceAnno20)
human	human_brain_rep2	20M	ReduceAnno20	IsoQuant	NRMSE	0.0558869	IsoQuant(ReduceAnno20)
human	human_brain_rep2	20M	ReduceAnno20	IsoQuant	Pearson	0.987843	IsoQuant(ReduceAnno20)
human	human_brain_rep2	20M	ReduceAnno20	IsoQuant	Spearman	0.978281	IsoQuant(ReduceAnno20)
human	human_brain_rep2	20M	ReduceAnno40	IsoQuant	CCC.est	0.987866	IsoQuant(ReduceAnno40)
human	human_brain_rep2	20M	ReduceAnno40	IsoQuant	NRMSE	0.0555978	IsoQuant(ReduceAnno40)
human	human_brain_rep2	20M	ReduceAnno40	IsoQuant	Pearson	0.987953	IsoQuant(ReduceAnno40)
human	human_brain_rep2	20M	ReduceAnno40	IsoQuant	Spearman	0.979656	IsoQuant(ReduceAnno40)
mouse	mouse_heart_rep2	20M	ReduceAnno20	IsoQuant	CCC.est	0.986642	IsoQuant(ReduceAnno20)
mouse	mouse_heart_rep2	20M	ReduceAnno20	IsoQuant	NRMSE	0.0577448	IsoQuant(ReduceAnno20)
mouse	mouse_heart_rep2	20M	ReduceAnno20	IsoQuant	Pearson	0.986716	IsoQuant(ReduceAnno20)
mouse	mouse_heart_rep2	20M	ReduceAnno20	IsoQuant	Spearman	0.9798	IsoQuant(ReduceAnno20)
human	human_brain_rep1	3M	ReduceAnno20	Mandalorion	CCC.est	0.981456	Mandalorion(ReduceAnno20)
human	human_brain_rep1	3M	ReduceAnno20	Mandalorion	NRMSE	0.0835235	Mandalorion(ReduceAnno20)
human	human_brain_rep1	3M	ReduceAnno20	Mandalorion	Pearson	0.991478	Mandalorion(ReduceAnno20)
human	human_brain_rep1	3M	ReduceAnno20	Mandalorion	Spearman	0.978757	Mandalorion(ReduceAnno20)
mouse	mouse_brain_rep2	20M	FullAnno	IsoQuant	CCC.est	0.98561	IsoQuant(FullAnno)
mouse	mouse_brain_rep2	20M	FullAnno	IsoQuant	NRMSE	0.0600114	IsoQuant(FullAnno)
mouse	mouse_brain_rep2	20M	FullAnno	IsoQuant	Pearson	0.985845	IsoQuant(FullAnno)
mouse	mouse_brain_rep2	20M	FullAnno	IsoQuant	Spearman	0.980043	IsoQuant(FullAnno)
human	human_brain_rep2	20M	FullAnno	Mandalorion	CCC.est	0.985242	Mandalorion(FullAnno)
human	human_brain_rep2	20M	FullAnno	Mandalorion	NRMSE	0.0624564	Mandalorion(FullAnno)
human	human_brain_rep2	20M	FullAnno	Mandalorion	Pearson	0.993393	Mandalorion(FullAnno)
human	human_brain_rep2	20M	FullAnno	Mandalorion	Spearman	0.978764	Mandalorion(FullAnno)
human	human_brain_rep2	3M	ReduceAnno20	ISAtools	CCC.est	0.988997	ISAtools(ReduceAnno20)
human	human_brain_rep2	3M	ReduceAnno20	ISAtools	NRMSE	0.0844008	ISAtools(ReduceAnno20)
human	human_brain_rep2	3M	ReduceAnno20	ISAtools	Pearson	0.989764	ISAtools(ReduceAnno20)
human	human_brain_rep2	3M	ReduceAnno20	ISAtools	Spearman	0.980885	ISAtools(ReduceAnno20)
human	human_heart_rep2	3M	ReduceAnno40	ISAtools	CCC.est	0.989569	ISAtools(ReduceAnno40)
human	human_heart_rep2	3M	ReduceAnno40	ISAtools	NRMSE	0.0845513	ISAtools(ReduceAnno40)
human	human_heart_rep2	3M	ReduceAnno40	ISAtools	Pearson	0.989875	ISAtools(ReduceAnno40)
human	human_heart_rep2	3M	ReduceAnno40	ISAtools	Spearman	0.9802	ISAtools(ReduceAnno40)
mouse	mouse_brain_rep1	20M	ReduceAnno20	ISAtools	CCC.est	0.988767	ISAtools(ReduceAnno20)
mouse	mouse_brain_rep1	20M	ReduceAnno20	ISAtools	NRMSE	0.0531686	ISAtools(ReduceAnno20)
mouse	mouse_brain_rep1	20M	ReduceAnno20	ISAtools	Pearson	0.989941	ISAtools(ReduceAnno20)
mouse	mouse_brain_rep1	20M	ReduceAnno20	ISAtools	Spearman	0.980008	ISAtools(ReduceAnno20)
human	human_brain_rep1	20M	ReduceAnno20	ISAtools	CCC.est	0.988729	ISAtools(ReduceAnno20)
human	human_brain_rep1	20M	ReduceAnno20	ISAtools	NRMSE	0.0632807	ISAtools(ReduceAnno20)
human	human_brain_rep1	20M	ReduceAnno20	ISAtools	Pearson	0.989976	ISAtools(ReduceAnno20)
human	human_brain_rep1	20M	ReduceAnno20	ISAtools	Spearman	0.974509	ISAtools(ReduceAnno20)
human	human_heart_rep2	20M	NoAnno	Bambu	CCC.est	0.991971	Bambu(NoAnno)
human	human_heart_rep2	20M	NoAnno	Bambu	NRMSE	0.0472963	Bambu(NoAnno)
human	human_heart_rep2	20M	NoAnno	Bambu	Pearson	0.992055	Bambu(NoAnno)
human	human_heart_rep2	20M	NoAnno	Bambu	Spearman	0.987335	Bambu(NoAnno)
mouse	mouse_brain_rep2	20M	FullAnno	Bambu	CCC.est	0.990987	Bambu(FullAnno)
mouse	mouse_brain_rep2	20M	FullAnno	Bambu	NRMSE	0.0473608	Bambu(FullAnno)
mouse	mouse_brain_rep2	20M	FullAnno	Bambu	Pearson	0.991075	Bambu(FullAnno)
mouse	mouse_brain_rep2	20M	FullAnno	Bambu	Spearman	0.984418	Bambu(FullAnno)
human	human_heart_rep2	20M	ReduceAnno40	IsoQuant	CCC.est	0.986046	IsoQuant(ReduceAnno40)
human	human_heart_rep2	20M	ReduceAnno40	IsoQuant	NRMSE	0.0634498	IsoQuant(ReduceAnno40)
human	human_heart_rep2	20M	ReduceAnno40	IsoQuant	Pearson	0.986131	IsoQuant(ReduceAnno40)
human	human_heart_rep2	20M	ReduceAnno40	IsoQuant	Spearman	0.980069	IsoQuant(ReduceAnno40)
human	human_brain_rep2	12M	FullAnno	Mandalorion	CCC.est	0.983683	Mandalorion(FullAnno)
human	human_brain_rep2	12M	FullAnno	Mandalorion	NRMSE	0.0731521	Mandalorion(FullAnno)
human	human_brain_rep2	12M	FullAnno	Mandalorion	Pearson	0.993118	Mandalorion(FullAnno)
human	human_brain_rep2	12M	FullAnno	Mandalorion	Spearman	0.978905	Mandalorion(FullAnno)
human	human_brain_rep2	20M	ReduceAnno20	Mandalorion	CCC.est	0.985439	Mandalorion(ReduceAnno20)
human	human_brain_rep2	20M	ReduceAnno20	Mandalorion	NRMSE	0.0620163	Mandalorion(ReduceAnno20)
human	human_brain_rep2	20M	ReduceAnno20	Mandalorion	Pearson	0.99348	Mandalorion(ReduceAnno20)
human	human_brain_rep2	20M	ReduceAnno20	Mandalorion	Spearman	0.979187	Mandalorion(ReduceAnno20)
human	human_brain_rep1	3M	ReduceAnno40	Mandalorion	CCC.est	0.981708	Mandalorion(ReduceAnno40)
human	human_brain_rep1	3M	ReduceAnno40	Mandalorion	NRMSE	0.0829105	Mandalorion(ReduceAnno40)
human	human_brain_rep1	3M	ReduceAnno40	Mandalorion	Pearson	0.991574	Mandalorion(ReduceAnno40)
human	human_brain_rep1	3M	ReduceAnno40	Mandalorion	Spearman	0.979215	Mandalorion(ReduceAnno40)
mouse	mouse_brain_rep1	6M	FullAnno	Bambu	CCC.est	0.994428	Bambu(FullAnno)
mouse	mouse_brain_rep1	6M	FullAnno	Bambu	NRMSE	0.0481165	Bambu(FullAnno)
mouse	mouse_brain_rep1	6M	FullAnno	Bambu	Pearson	0.994497	Bambu(FullAnno)
mouse	mouse_brain_rep1	6M	FullAnno	Bambu	Spearman	0.989539	Bambu(FullAnno)
human	human_brain_rep2	12M	ReduceAnno20	Mandalorion	CCC.est	0.983843	Mandalorion(ReduceAnno20)
human	human_brain_rep2	12M	ReduceAnno20	Mandalorion	NRMSE	0.0727637	Mandalorion(ReduceAnno20)
human	human_brain_rep2	12M	ReduceAnno20	Mandalorion	Pearson	0.993165	Mandalorion(ReduceAnno20)
human	human_brain_rep2	12M	ReduceAnno20	Mandalorion	Spearman	0.979378	Mandalorion(ReduceAnno20)
mouse	mouse_brain_rep1	20M	FullAnno	Bambu	CCC.est	0.990621	Bambu(FullAnno)
mouse	mouse_brain_rep1	20M	FullAnno	Bambu	NRMSE	0.0483691	Bambu(FullAnno)
mouse	mouse_brain_rep1	20M	FullAnno	Bambu	Pearson	0.990735	Bambu(FullAnno)
mouse	mouse_brain_rep1	20M	FullAnno	Bambu	Spearman	0.98448	Bambu(FullAnno)
mouse	mouse_brain_rep2	12M	FullAnno	Bambu	CCC.est	0.992415	Bambu(FullAnno)
mouse	mouse_brain_rep2	12M	FullAnno	Bambu	NRMSE	0.0485268	Bambu(FullAnno)
mouse	mouse_brain_rep2	12M	FullAnno	Bambu	Pearson	0.992487	Bambu(FullAnno)
mouse	mouse_brain_rep2	12M	FullAnno	Bambu	Spearman	0.986662	Bambu(FullAnno)
human	human_brain_rep2	12M	ReduceAnno40	Mandalorion	CCC.est	0.984029	Mandalorion(ReduceAnno40)
human	human_brain_rep2	12M	ReduceAnno40	Mandalorion	NRMSE	0.0723959	Mandalorion(ReduceAnno40)
human	human_brain_rep2	12M	ReduceAnno40	Mandalorion	Pearson	0.993197	Mandalorion(ReduceAnno40)
human	human_brain_rep2	12M	ReduceAnno40	Mandalorion	Spearman	0.979579	Mandalorion(ReduceAnno40)
human	human_brain_rep2	3M	ReduceAnno40	ISAtools	CCC.est	0.989405	ISAtools(ReduceAnno40)
human	human_brain_rep2	3M	ReduceAnno40	ISAtools	NRMSE	0.0824952	ISAtools(ReduceAnno40)
human	human_brain_rep2	3M	ReduceAnno40	ISAtools	Pearson	0.990008	ISAtools(ReduceAnno40)
human	human_brain_rep2	3M	ReduceAnno40	ISAtools	Spearman	0.982122	ISAtools(ReduceAnno40)
human	human_brain_rep2	20M	ReduceAnno40	Mandalorion	CCC.est	0.985716	Mandalorion(ReduceAnno40)
human	human_brain_rep2	20M	ReduceAnno40	Mandalorion	NRMSE	0.0614875	Mandalorion(ReduceAnno40)
human	human_brain_rep2	20M	ReduceAnno40	Mandalorion	Pearson	0.993596	Mandalorion(ReduceAnno40)
human	human_brain_rep2	20M	ReduceAnno40	Mandalorion	Spearman	0.979583	Mandalorion(ReduceAnno40)
mouse	mouse_heart_rep2	20M	FullAnno	IsoQuant	CCC.est	0.987898	IsoQuant(FullAnno)
mouse	mouse_heart_rep2	20M	FullAnno	IsoQuant	NRMSE	0.0552229	IsoQuant(FullAnno)
mouse	mouse_heart_rep2	20M	FullAnno	IsoQuant	Pearson	0.988128	IsoQuant(FullAnno)
mouse	mouse_heart_rep2	20M	FullAnno	IsoQuant	Spearman	0.980386	IsoQuant(FullAnno)
human	human_brain_rep2	3M	FullAnno	Mandalorion	CCC.est	0.979367	Mandalorion(FullAnno)
human	human_brain_rep2	3M	FullAnno	Mandalorion	NRMSE	0.0853917	Mandalorion(FullAnno)
human	human_brain_rep2	3M	FullAnno	Mandalorion	Pearson	0.990587	Mandalorion(FullAnno)
human	human_brain_rep2	3M	FullAnno	Mandalorion	Spearman	0.980048	Mandalorion(FullAnno)
human	human_brain_rep2	12M	FullAnno	IsoQuant	CCC.est	0.988419	IsoQuant(FullAnno)
human	human_brain_rep2	12M	FullAnno	IsoQuant	NRMSE	0.0606952	IsoQuant(FullAnno)
human	human_brain_rep2	12M	FullAnno	IsoQuant	Pearson	0.988619	IsoQuant(FullAnno)
human	human_brain_rep2	12M	FullAnno	IsoQuant	Spearman	0.980429	IsoQuant(FullAnno)
human	human_brain_rep1	20M	ReduceAnno40	ISAtools	CCC.est	0.988888	ISAtools(ReduceAnno40)
human	human_brain_rep1	20M	ReduceAnno40	ISAtools	NRMSE	0.0630153	ISAtools(ReduceAnno40)
human	human_brain_rep1	20M	ReduceAnno40	ISAtools	Pearson	0.990089	ISAtools(ReduceAnno40)
human	human_brain_rep1	20M	ReduceAnno40	ISAtools	Spearman	0.974561	ISAtools(ReduceAnno40)
human	human_brain_rep2	3M	ReduceAnno20	Mandalorion	CCC.est	0.979492	Mandalorion(ReduceAnno20)
human	human_brain_rep2	3M	ReduceAnno20	Mandalorion	NRMSE	0.0850522	Mandalorion(ReduceAnno20)
human	human_brain_rep2	3M	ReduceAnno20	Mandalorion	Pearson	0.990643	Mandalorion(ReduceAnno20)
human	human_brain_rep2	3M	ReduceAnno20	Mandalorion	Spearman	0.980333	Mandalorion(ReduceAnno20)
human	human_brain_rep1	3M	NoAnno	Mandalorion	CCC.est	0.982492	Mandalorion(NoAnno)
human	human_brain_rep1	3M	NoAnno	Mandalorion	NRMSE	0.0809966	Mandalorion(NoAnno)
human	human_brain_rep1	3M	NoAnno	Mandalorion	Pearson	0.991991	Mandalorion(NoAnno)
human	human_brain_rep1	3M	NoAnno	Mandalorion	Spearman	0.980655	Mandalorion(NoAnno)
human	human_brain_rep2	12M	NoAnno	Mandalorion	CCC.est	0.984713	Mandalorion(NoAnno)
human	human_brain_rep2	12M	NoAnno	Mandalorion	NRMSE	0.0708851	Mandalorion(NoAnno)
human	human_brain_rep2	12M	NoAnno	Mandalorion	Pearson	0.993405	Mandalorion(NoAnno)
human	human_brain_rep2	12M	NoAnno	Mandalorion	Spearman	0.980785	Mandalorion(NoAnno)
human	human_brain_rep2	12M	FullAnno	ISAtools	CCC.est	0.988324	ISAtools(FullAnno)
human	human_brain_rep2	12M	FullAnno	ISAtools	NRMSE	0.061214	ISAtools(FullAnno)
human	human_brain_rep2	12M	FullAnno	ISAtools	Pearson	0.990098	ISAtools(FullAnno)
human	human_brain_rep2	12M	FullAnno	ISAtools	Spearman	0.973133	ISAtools(FullAnno)
mouse	mouse_brain_rep1	20M	ReduceAnno40	ISAtools	CCC.est	0.989144	ISAtools(ReduceAnno40)
mouse	mouse_brain_rep1	20M	ReduceAnno40	ISAtools	NRMSE	0.0523071	ISAtools(ReduceAnno40)
mouse	mouse_brain_rep1	20M	ReduceAnno40	ISAtools	Pearson	0.990236	ISAtools(ReduceAnno40)
mouse	mouse_brain_rep1	20M	ReduceAnno40	ISAtools	Spearman	0.980649	ISAtools(ReduceAnno40)
mouse	mouse_heart_rep2	20M	FullAnno	Bambu	CCC.est	0.990203	Bambu(FullAnno)
mouse	mouse_heart_rep2	20M	FullAnno	Bambu	NRMSE	0.0495562	Bambu(FullAnno)
mouse	mouse_heart_rep2	20M	FullAnno	Bambu	Pearson	0.990288	Bambu(FullAnno)
mouse	mouse_heart_rep2	20M	FullAnno	Bambu	Spearman	0.982375	Bambu(FullAnno)
mouse	mouse_heart_rep1	12M	FullAnno	Bambu	CCC.est	0.991926	Bambu(FullAnno)
mouse	mouse_heart_rep1	12M	FullAnno	Bambu	NRMSE	0.0497814	Bambu(FullAnno)
mouse	mouse_heart_rep1	12M	FullAnno	Bambu	Pearson	0.991991	Bambu(FullAnno)
mouse	mouse_heart_rep1	12M	FullAnno	Bambu	Spearman	0.9849	Bambu(FullAnno)
human	human_brain_rep2	3M	ReduceAnno40	Mandalorion	CCC.est	0.979806	Mandalorion(ReduceAnno40)
human	human_brain_rep2	3M	ReduceAnno40	Mandalorion	NRMSE	0.0843683	Mandalorion(ReduceAnno40)
human	human_brain_rep2	3M	ReduceAnno40	Mandalorion	Pearson	0.990768	Mandalorion(ReduceAnno40)
human	human_brain_rep2	3M	ReduceAnno40	Mandalorion	Spearman	0.98079	Mandalorion(ReduceAnno40)
mouse	mouse_brain_rep1	12M	ReduceAnno20	ISAtools	CCC.est	0.989124	ISAtools(ReduceAnno20)
mouse	mouse_brain_rep1	12M	ReduceAnno20	ISAtools	NRMSE	0.057732	ISAtools(ReduceAnno20)
mouse	mouse_brain_rep1	12M	ReduceAnno20	ISAtools	Pearson	0.990298	ISAtools(ReduceAnno20)
mouse	mouse_brain_rep1	12M	ReduceAnno20	ISAtools	Spearman	0.980665	ISAtools(ReduceAnno20)
human	human_brain_rep2	20M	NoAnno	Bambu	CCC.est	0.990004	Bambu(NoAnno)
human	human_brain_rep2	20M	NoAnno	Bambu	NRMSE	0.0501121	Bambu(NoAnno)
human	human_brain_rep2	20M	NoAnno	Bambu	Pearson	0.990074	Bambu(NoAnno)
human	human_brain_rep2	20M	NoAnno	Bambu	Spearman	0.984517	Bambu(NoAnno)
mouse	mouse_brain_rep2	6M	NoAnno	Bambu	CCC.est	0.993302	Bambu(NoAnno)
mouse	mouse_brain_rep2	6M	NoAnno	Bambu	NRMSE	0.0501481	Bambu(NoAnno)
mouse	mouse_brain_rep2	6M	NoAnno	Bambu	Pearson	0.993355	Bambu(NoAnno)
mouse	mouse_brain_rep2	6M	NoAnno	Bambu	Spearman	0.991327	Bambu(NoAnno)
mouse	mouse_heart_rep2	6M	NoAnno	Bambu	CCC.est	0.993612	Bambu(NoAnno)
mouse	mouse_heart_rep2	6M	NoAnno	Bambu	NRMSE	0.0503268	Bambu(NoAnno)
mouse	mouse_heart_rep2	6M	NoAnno	Bambu	Pearson	0.993658	Bambu(NoAnno)
mouse	mouse_heart_rep2	6M	NoAnno	Bambu	Spearman	0.990303	Bambu(NoAnno)
human	human_brain_rep2	20M	NoAnno	Mandalorion	CCC.est	0.986519	Mandalorion(NoAnno)
human	human_brain_rep2	20M	NoAnno	Mandalorion	NRMSE	0.0598276	Mandalorion(NoAnno)
human	human_brain_rep2	20M	NoAnno	Mandalorion	Pearson	0.993923	Mandalorion(NoAnno)
human	human_brain_rep2	20M	NoAnno	Mandalorion	Spearman	0.980989	Mandalorion(NoAnno)
mouse	mouse_heart_rep1	6M	NoAnno	Bambu	CCC.est	0.993578	Bambu(NoAnno)
mouse	mouse_heart_rep1	6M	NoAnno	Bambu	NRMSE	0.0504449	Bambu(NoAnno)
mouse	mouse_heart_rep1	6M	NoAnno	Bambu	Pearson	0.993638	Bambu(NoAnno)
mouse	mouse_heart_rep1	6M	NoAnno	Bambu	Spearman	0.990246	Bambu(NoAnno)
human	human_heart_rep1	20M	NoAnno	Bambu	CCC.est	0.992729	Bambu(NoAnno)
human	human_heart_rep1	20M	NoAnno	Bambu	NRMSE	0.0506114	Bambu(NoAnno)
human	human_heart_rep1	20M	NoAnno	Bambu	Pearson	0.99276	Bambu(NoAnno)
human	human_heart_rep1	20M	NoAnno	Bambu	Spearman	0.988932	Bambu(NoAnno)
mouse	mouse_heart_rep2	12M	FullAnno	Bambu	CCC.est	0.99164	Bambu(FullAnno)
mouse	mouse_heart_rep2	12M	FullAnno	Bambu	NRMSE	0.0507307	Bambu(FullAnno)
mouse	mouse_heart_rep2	12M	FullAnno	Bambu	Pearson	0.991712	Bambu(FullAnno)
mouse	mouse_heart_rep2	12M	FullAnno	Bambu	Spearman	0.984077	Bambu(FullAnno)
human	human_heart_rep2	3M	FullAnno	Mandalorion	CCC.est	0.983141	Mandalorion(FullAnno)
human	human_heart_rep2	3M	FullAnno	Mandalorion	NRMSE	0.0809401	Mandalorion(FullAnno)
human	human_heart_rep2	3M	FullAnno	Mandalorion	Pearson	0.992005	Mandalorion(FullAnno)
human	human_heart_rep2	3M	FullAnno	Mandalorion	Spearman	0.981647	Mandalorion(FullAnno)
human	human_brain_rep1	12M	ReduceAnno20	ISAtools	CCC.est	0.989276	ISAtools(ReduceAnno20)
human	human_brain_rep1	12M	ReduceAnno20	ISAtools	NRMSE	0.0692507	ISAtools(ReduceAnno20)
human	human_brain_rep1	12M	ReduceAnno20	ISAtools	Pearson	0.990417	ISAtools(ReduceAnno20)
human	human_brain_rep1	12M	ReduceAnno20	ISAtools	Spearman	0.976128	ISAtools(ReduceAnno20)
human	human_brain_rep2	6M	NoAnno	ISAtools	CCC.est	0.989701	ISAtools(NoAnno)
human	human_brain_rep2	6M	NoAnno	ISAtools	NRMSE	0.0687957	ISAtools(NoAnno)
human	human_brain_rep2	6M	NoAnno	ISAtools	Pearson	0.990536	ISAtools(NoAnno)
human	human_brain_rep2	6M	NoAnno	ISAtools	Spearman	0.976423	ISAtools(NoAnno)
mouse	mouse_heart_rep1	20M	ReduceAnno20	IsoQuant	CCC.est	0.987138	IsoQuant(ReduceAnno20)
mouse	mouse_heart_rep1	20M	ReduceAnno20	IsoQuant	NRMSE	0.0566605	IsoQuant(ReduceAnno20)
mouse	mouse_heart_rep1	20M	ReduceAnno20	IsoQuant	Pearson	0.98722	IsoQuant(ReduceAnno20)
mouse	mouse_heart_rep1	20M	ReduceAnno20	IsoQuant	Spearman	0.980975	IsoQuant(ReduceAnno20)
human	human_brain_rep2	12M	ReduceAnno20	IsoQuant	CCC.est	0.988431	IsoQuant(ReduceAnno20)
human	human_brain_rep2	12M	ReduceAnno20	IsoQuant	NRMSE	0.0606172	IsoQuant(ReduceAnno20)
human	human_brain_rep2	12M	ReduceAnno20	IsoQuant	Pearson	0.98853	IsoQuant(ReduceAnno20)
human	human_brain_rep2	12M	ReduceAnno20	IsoQuant	Spearman	0.981264	IsoQuant(ReduceAnno20)
mouse	mouse_brain_rep1	6M	NoAnno	Bambu	CCC.est	0.992832	Bambu(NoAnno)
mouse	mouse_brain_rep1	6M	NoAnno	Bambu	NRMSE	0.0514873	Bambu(NoAnno)
mouse	mouse_brain_rep1	6M	NoAnno	Bambu	Pearson	0.99288	Bambu(NoAnno)
mouse	mouse_brain_rep1	6M	NoAnno	Bambu	Spearman	0.990347	Bambu(NoAnno)
human	human_brain_rep1	12M	ReduceAnno40	ISAtools	CCC.est	0.989475	ISAtools(ReduceAnno40)
human	human_brain_rep1	12M	ReduceAnno40	ISAtools	NRMSE	0.0687659	ISAtools(ReduceAnno40)
human	human_brain_rep1	12M	ReduceAnno40	ISAtools	Pearson	0.990548	ISAtools(ReduceAnno40)
human	human_brain_rep1	12M	ReduceAnno40	ISAtools	Spearman	0.976008	ISAtools(ReduceAnno40)
mouse	mouse_brain_rep2	6M	FullAnno	Bambu	CCC.est	0.993722	Bambu(FullAnno)
mouse	mouse_brain_rep2	6M	FullAnno	Bambu	NRMSE	0.0516215	Bambu(FullAnno)
mouse	mouse_brain_rep2	6M	FullAnno	Bambu	Pearson	0.993774	Bambu(FullAnno)
mouse	mouse_brain_rep2	6M	FullAnno	Bambu	Spearman	0.989018	Bambu(FullAnno)
mouse	mouse_heart_rep1	20M	FullAnno	Bambu	CCC.est	0.989278	Bambu(FullAnno)
mouse	mouse_heart_rep1	20M	FullAnno	Bambu	NRMSE	0.0517823	Bambu(FullAnno)
mouse	mouse_heart_rep1	20M	FullAnno	Bambu	Pearson	0.989357	Bambu(FullAnno)
mouse	mouse_heart_rep1	20M	FullAnno	Bambu	Spearman	0.982305	Bambu(FullAnno)
human	human_heart_rep2	12M	NoAnno	Bambu	CCC.est	0.992221	Bambu(NoAnno)
human	human_heart_rep2	12M	NoAnno	Bambu	NRMSE	0.0518879	Bambu(NoAnno)
human	human_heart_rep2	12M	NoAnno	Bambu	Pearson	0.992279	Bambu(NoAnno)
human	human_heart_rep2	12M	NoAnno	Bambu	Spearman	0.988587	Bambu(NoAnno)
human	human_brain_rep2	6M	FullAnno	ISAtools	CCC.est	0.989108	ISAtools(FullAnno)
human	human_brain_rep2	6M	FullAnno	ISAtools	NRMSE	0.0704484	ISAtools(FullAnno)
human	human_brain_rep2	6M	FullAnno	ISAtools	Pearson	0.990634	ISAtools(FullAnno)
human	human_brain_rep2	6M	FullAnno	ISAtools	Spearman	0.976993	ISAtools(FullAnno)
human	human_brain_rep1	20M	NoAnno	ISAtools	CCC.est	0.98962	ISAtools(NoAnno)
human	human_brain_rep1	20M	NoAnno	ISAtools	NRMSE	0.0612838	ISAtools(NoAnno)
human	human_brain_rep1	20M	NoAnno	ISAtools	Pearson	0.990721	ISAtools(NoAnno)
human	human_brain_rep1	20M	NoAnno	ISAtools	Spearman	0.975485	ISAtools(NoAnno)
mouse	mouse_brain_rep1	20M	FullAnno	ISAtools	CCC.est	0.989523	ISAtools(FullAnno)
mouse	mouse_brain_rep1	20M	FullAnno	ISAtools	NRMSE	0.0513349	ISAtools(FullAnno)
mouse	mouse_brain_rep1	20M	FullAnno	ISAtools	Pearson	0.990912	ISAtools(FullAnno)
mouse	mouse_brain_rep1	20M	FullAnno	ISAtools	Spearman	0.980497	ISAtools(FullAnno)
mouse	mouse_brain_rep1	20M	FullAnno	IsoQuant	CCC.est	0.987065	IsoQuant(FullAnno)
mouse	mouse_brain_rep1	20M	FullAnno	IsoQuant	NRMSE	0.0569024	IsoQuant(FullAnno)
mouse	mouse_brain_rep1	20M	FullAnno	IsoQuant	Pearson	0.987315	IsoQuant(FullAnno)
mouse	mouse_brain_rep1	20M	FullAnno	IsoQuant	Spearman	0.981438	IsoQuant(FullAnno)
human	human_heart_rep2	20M	ReduceAnno40	ISAtools	CCC.est	0.989979	ISAtools(ReduceAnno40)
human	human_heart_rep2	20M	ReduceAnno40	ISAtools	NRMSE	0.0540475	ISAtools(ReduceAnno40)
human	human_heart_rep2	20M	ReduceAnno40	ISAtools	Pearson	0.990948	ISAtools(ReduceAnno40)
human	human_heart_rep2	20M	ReduceAnno40	ISAtools	Spearman	0.975312	ISAtools(ReduceAnno40)
human	human_brain_rep1	20M	NoAnno	Bambu	CCC.est	0.991637	Bambu(NoAnno)
human	human_brain_rep1	20M	NoAnno	Bambu	NRMSE	0.0532253	Bambu(NoAnno)
human	human_brain_rep1	20M	NoAnno	Bambu	Pearson	0.991669	Bambu(NoAnno)
human	human_brain_rep1	20M	NoAnno	Bambu	Spearman	0.987393	Bambu(NoAnno)
human	human_heart_rep2	20M	ReduceAnno20	ISAtools	CCC.est	0.989918	ISAtools(ReduceAnno20)
human	human_heart_rep2	20M	ReduceAnno20	ISAtools	NRMSE	0.0541086	ISAtools(ReduceAnno20)
human	human_heart_rep2	20M	ReduceAnno20	ISAtools	Pearson	0.990965	ISAtools(ReduceAnno20)
human	human_heart_rep2	20M	ReduceAnno20	ISAtools	Spearman	0.974988	ISAtools(ReduceAnno20)
mouse	mouse_heart_rep2	6M	FullAnno	Bambu	CCC.est	0.993442	Bambu(FullAnno)
mouse	mouse_heart_rep2	6M	FullAnno	Bambu	NRMSE	0.0536548	Bambu(FullAnno)
mouse	mouse_heart_rep2	6M	FullAnno	Bambu	Pearson	0.99349	Bambu(FullAnno)
mouse	mouse_heart_rep2	6M	FullAnno	Bambu	Spearman	0.987476	Bambu(FullAnno)
mouse	mouse_heart_rep1	20M	FullAnno	IsoQuant	CCC.est	0.988375	IsoQuant(FullAnno)
mouse	mouse_heart_rep1	20M	FullAnno	IsoQuant	NRMSE	0.0540926	IsoQuant(FullAnno)
mouse	mouse_heart_rep1	20M	FullAnno	IsoQuant	Pearson	0.988599	IsoQuant(FullAnno)
mouse	mouse_heart_rep1	20M	FullAnno	IsoQuant	Spearman	0.98171	IsoQuant(FullAnno)
mouse	mouse_heart_rep2	20M	ReduceAnno40	IsoQuant	CCC.est	0.987176	IsoQuant(ReduceAnno40)
mouse	mouse_heart_rep2	20M	ReduceAnno40	IsoQuant	NRMSE	0.0562803	IsoQuant(ReduceAnno40)
mouse	mouse_heart_rep2	20M	ReduceAnno40	IsoQuant	Pearson	0.987229	IsoQuant(ReduceAnno40)
mouse	mouse_heart_rep2	20M	ReduceAnno40	IsoQuant	Spearman	0.981718	IsoQuant(ReduceAnno40)
mouse	mouse_heart_rep1	6M	FullAnno	Bambu	CCC.est	0.993363	Bambu(FullAnno)
mouse	mouse_heart_rep1	6M	FullAnno	Bambu	NRMSE	0.053883	Bambu(FullAnno)
mouse	mouse_heart_rep1	6M	FullAnno	Bambu	Pearson	0.993406	Bambu(FullAnno)
mouse	mouse_heart_rep1	6M	FullAnno	Bambu	Spearman	0.987525	Bambu(FullAnno)
mouse	mouse_brain_rep2	20M	ReduceAnno20	IsoQuant	CCC.est	0.987056	IsoQuant(ReduceAnno20)
mouse	mouse_brain_rep2	20M	ReduceAnno20	IsoQuant	NRMSE	0.0566654	IsoQuant(ReduceAnno20)
mouse	mouse_brain_rep2	20M	ReduceAnno20	IsoQuant	Pearson	0.987156	IsoQuant(ReduceAnno20)
mouse	mouse_brain_rep2	20M	ReduceAnno20	IsoQuant	Spearman	0.981867	IsoQuant(ReduceAnno20)
mouse	mouse_brain_rep1	6M	ReduceAnno20	ISAtools	CCC.est	0.989979	ISAtools(ReduceAnno20)
mouse	mouse_brain_rep1	6M	ReduceAnno20	ISAtools	NRMSE	0.0646133	ISAtools(ReduceAnno20)
mouse	mouse_brain_rep1	6M	ReduceAnno20	ISAtools	Pearson	0.991012	ISAtools(ReduceAnno20)
mouse	mouse_brain_rep1	6M	ReduceAnno20	ISAtools	Spearman	0.982768	ISAtools(ReduceAnno20)
mouse	mouse_brain_rep1	20M	NoAnno	ISAtools	CCC.est	0.990062	ISAtools(NoAnno)
mouse	mouse_brain_rep1	20M	NoAnno	ISAtools	NRMSE	0.0500527	ISAtools(NoAnno)
mouse	mouse_brain_rep1	20M	NoAnno	ISAtools	Pearson	0.991024	ISAtools(NoAnno)
mouse	mouse_brain_rep1	20M	NoAnno	ISAtools	Spearman	0.982383	ISAtools(NoAnno)
mouse	mouse_brain_rep1	20M	ReduceAnno20	IsoQuant	CCC.est	0.986882	IsoQuant(ReduceAnno20)
mouse	mouse_brain_rep1	20M	ReduceAnno20	IsoQuant	NRMSE	0.0570316	IsoQuant(ReduceAnno20)
mouse	mouse_brain_rep1	20M	ReduceAnno20	IsoQuant	Pearson	0.987	IsoQuant(ReduceAnno20)
mouse	mouse_brain_rep1	20M	ReduceAnno20	IsoQuant	Spearman	0.981868	IsoQuant(ReduceAnno20)
human	human_heart_rep2	12M	ReduceAnno20	IsoQuant	CCC.est	0.987416	IsoQuant(ReduceAnno20)
human	human_heart_rep2	12M	ReduceAnno20	IsoQuant	NRMSE	0.0679963	IsoQuant(ReduceAnno20)
human	human_heart_rep2	12M	ReduceAnno20	IsoQuant	Pearson	0.987495	IsoQuant(ReduceAnno20)
human	human_heart_rep2	12M	ReduceAnno20	IsoQuant	Spearman	0.981953	IsoQuant(ReduceAnno20)
mouse	mouse_brain_rep1	12M	ReduceAnno40	ISAtools	CCC.est	0.989983	ISAtools(ReduceAnno40)
mouse	mouse_brain_rep1	12M	ReduceAnno40	ISAtools	NRMSE	0.0554053	ISAtools(ReduceAnno40)
mouse	mouse_brain_rep1	12M	ReduceAnno40	ISAtools	Pearson	0.991049	ISAtools(ReduceAnno40)
mouse	mouse_brain_rep1	12M	ReduceAnno40	ISAtools	Spearman	0.981785	ISAtools(ReduceAnno40)
human	human_heart_rep2	20M	FullAnno	Mandalorion	CCC.est	0.98694	Mandalorion(FullAnno)
human	human_heart_rep2	20M	FullAnno	Mandalorion	NRMSE	0.0622127	Mandalorion(FullAnno)
human	human_heart_rep2	20M	FullAnno	Mandalorion	Pearson	0.993969	Mandalorion(FullAnno)
human	human_heart_rep2	20M	FullAnno	Mandalorion	Spearman	0.981828	Mandalorion(FullAnno)
human	human_heart_rep2	6M	ReduceAnno40	ISAtools	CCC.est	0.990304	ISAtools(ReduceAnno40)
human	human_heart_rep2	6M	ReduceAnno40	ISAtools	NRMSE	0.0691856	ISAtools(ReduceAnno40)
human	human_heart_rep2	6M	ReduceAnno40	ISAtools	Pearson	0.991095	ISAtools(ReduceAnno40)
human	human_heart_rep2	6M	ReduceAnno40	ISAtools	Spearman	0.978286	ISAtools(ReduceAnno40)
human	human_heart_rep2	6M	ReduceAnno20	ISAtools	CCC.est	0.990202	ISAtools(ReduceAnno20)
human	human_heart_rep2	6M	ReduceAnno20	ISAtools	NRMSE	0.0695452	ISAtools(ReduceAnno20)
human	human_heart_rep2	6M	ReduceAnno20	ISAtools	Pearson	0.991102	ISAtools(ReduceAnno20)
human	human_heart_rep2	6M	ReduceAnno20	ISAtools	Spearman	0.97828	ISAtools(ReduceAnno20)
human	human_heart_rep2	12M	ReduceAnno40	ISAtools	CCC.est	0.990268	ISAtools(ReduceAnno40)
human	human_heart_rep2	12M	ReduceAnno40	ISAtools	NRMSE	0.0601357	ISAtools(ReduceAnno40)
human	human_heart_rep2	12M	ReduceAnno40	ISAtools	Pearson	0.991174	ISAtools(ReduceAnno40)
human	human_heart_rep2	12M	ReduceAnno40	ISAtools	Spearman	0.978041	ISAtools(ReduceAnno40)
mouse	mouse_heart_rep2	12M	ReduceAnno20	IsoQuant	CCC.est	0.988671	IsoQuant(ReduceAnno20)
mouse	mouse_heart_rep2	12M	ReduceAnno20	IsoQuant	NRMSE	0.0589214	IsoQuant(ReduceAnno20)
mouse	mouse_heart_rep2	12M	ReduceAnno20	IsoQuant	Pearson	0.988723	IsoQuant(ReduceAnno20)
mouse	mouse_heart_rep2	12M	ReduceAnno20	IsoQuant	Spearman	0.982237	IsoQuant(ReduceAnno20)
mouse	mouse_brain_rep2	3M	NoAnno	Bambu	CCC.est	0.994113	Bambu(NoAnno)
mouse	mouse_brain_rep2	3M	NoAnno	Bambu	NRMSE	0.0550216	Bambu(NoAnno)
mouse	mouse_brain_rep2	3M	NoAnno	Bambu	Pearson	0.994117	Bambu(NoAnno)
mouse	mouse_brain_rep2	3M	NoAnno	Bambu	Spearman	0.993389	Bambu(NoAnno)
human	human_brain_rep1	20M	FullAnno	ISAtools	CCC.est	0.989718	ISAtools(FullAnno)
human	human_brain_rep1	20M	FullAnno	ISAtools	NRMSE	0.0603107	ISAtools(FullAnno)
human	human_brain_rep1	20M	FullAnno	ISAtools	Pearson	0.991193	ISAtools(FullAnno)
human	human_brain_rep1	20M	FullAnno	ISAtools	Spearman	0.975821	ISAtools(FullAnno)
mouse	mouse_heart_rep2	3M	NoAnno	Bambu	CCC.est	0.994079	Bambu(NoAnno)
mouse	mouse_heart_rep2	3M	NoAnno	Bambu	NRMSE	0.0552013	Bambu(NoAnno)
mouse	mouse_heart_rep2	3M	NoAnno	Bambu	Pearson	0.994092	Bambu(NoAnno)
mouse	mouse_heart_rep2	3M	NoAnno	Bambu	Spearman	0.990786	Bambu(NoAnno)
human	human_heart_rep1	20M	ReduceAnno20	IsoQuant	CCC.est	0.987712	IsoQuant(ReduceAnno20)
human	human_heart_rep1	20M	ReduceAnno20	IsoQuant	NRMSE	0.0672947	IsoQuant(ReduceAnno20)
human	human_heart_rep1	20M	ReduceAnno20	IsoQuant	Pearson	0.987785	IsoQuant(ReduceAnno20)
human	human_heart_rep1	20M	ReduceAnno20	IsoQuant	Spearman	0.982284	IsoQuant(ReduceAnno20)
mouse	mouse_heart_rep2	12M	FullAnno	IsoQuant	CCC.est	0.989668	IsoQuant(FullAnno)
mouse	mouse_heart_rep2	12M	FullAnno	IsoQuant	NRMSE	0.0565044	IsoQuant(FullAnno)
mouse	mouse_heart_rep2	12M	FullAnno	IsoQuant	Pearson	0.989847	IsoQuant(FullAnno)
mouse	mouse_heart_rep2	12M	FullAnno	IsoQuant	Spearman	0.982384	IsoQuant(FullAnno)
mouse	mouse_brain_rep2	20M	ReduceAnno20	ISAtools	CCC.est	0.99021	ISAtools(ReduceAnno20)
mouse	mouse_brain_rep2	20M	ReduceAnno20	ISAtools	NRMSE	0.0495067	ISAtools(ReduceAnno20)
mouse	mouse_brain_rep2	20M	ReduceAnno20	ISAtools	Pearson	0.991195	ISAtools(ReduceAnno20)
mouse	mouse_brain_rep2	20M	ReduceAnno20	ISAtools	Spearman	0.980944	ISAtools(ReduceAnno20)
mouse	mouse_brain_rep1	3M	FullAnno	Bambu	CCC.est	0.995215	Bambu(FullAnno)
mouse	mouse_brain_rep1	3M	FullAnno	Bambu	NRMSE	0.0553019	Bambu(FullAnno)
mouse	mouse_brain_rep1	3M	FullAnno	Bambu	Pearson	0.995251	Bambu(FullAnno)
mouse	mouse_brain_rep1	3M	FullAnno	Bambu	Spearman	0.992178	Bambu(FullAnno)
human	human_heart_rep1	12M	NoAnno	Bambu	CCC.est	0.992928	Bambu(NoAnno)
human	human_heart_rep1	12M	NoAnno	Bambu	NRMSE	0.0553469	Bambu(NoAnno)
human	human_heart_rep1	12M	NoAnno	Bambu	Pearson	0.992941	Bambu(NoAnno)
human	human_heart_rep1	12M	NoAnno	Bambu	Spearman	0.98951	Bambu(NoAnno)
human	human_brain_rep1	3M	NoAnno	ISAtools	CCC.est	0.990982	ISAtools(NoAnno)
human	human_brain_rep1	3M	NoAnno	ISAtools	NRMSE	0.069657	ISAtools(NoAnno)
human	human_brain_rep1	3M	NoAnno	ISAtools	Pearson	0.991245	ISAtools(NoAnno)
human	human_brain_rep1	3M	NoAnno	ISAtools	Spearman	0.98454	ISAtools(NoAnno)
human	human_brain_rep1	20M	FullAnno	IsoQuant	CCC.est	0.989627	IsoQuant(FullAnno)
human	human_brain_rep1	20M	FullAnno	IsoQuant	NRMSE	0.0603173	IsoQuant(FullAnno)
human	human_brain_rep1	20M	FullAnno	IsoQuant	Pearson	0.98979	IsoQuant(FullAnno)
human	human_brain_rep1	20M	FullAnno	IsoQuant	Spearman	0.982398	IsoQuant(FullAnno)
human	human_brain_rep2	20M	NoAnno	IsoQuant	CCC.est	0.988605	IsoQuant(NoAnno)
human	human_brain_rep2	20M	NoAnno	IsoQuant	NRMSE	0.0538246	IsoQuant(NoAnno)
human	human_brain_rep2	20M	NoAnno	IsoQuant	Pearson	0.988679	IsoQuant(NoAnno)
human	human_brain_rep2	20M	NoAnno	IsoQuant	Spearman	0.982457	IsoQuant(NoAnno)
human	human_heart_rep2	3M	ReduceAnno20	Mandalorion	CCC.est	0.983285	Mandalorion(ReduceAnno20)
human	human_heart_rep2	3M	ReduceAnno20	Mandalorion	NRMSE	0.0805095	Mandalorion(ReduceAnno20)
human	human_heart_rep2	3M	ReduceAnno20	Mandalorion	Pearson	0.992121	Mandalorion(ReduceAnno20)
human	human_heart_rep2	3M	ReduceAnno20	Mandalorion	Spearman	0.981979	Mandalorion(ReduceAnno20)
mouse	mouse_heart_rep1	12M	ReduceAnno20	IsoQuant	CCC.est	0.988198	IsoQuant(ReduceAnno20)
mouse	mouse_heart_rep1	12M	ReduceAnno20	IsoQuant	NRMSE	0.0600672	IsoQuant(ReduceAnno20)
mouse	mouse_heart_rep1	12M	ReduceAnno20	IsoQuant	Pearson	0.988259	IsoQuant(ReduceAnno20)
mouse	mouse_heart_rep1	12M	ReduceAnno20	IsoQuant	Spearman	0.98246	IsoQuant(ReduceAnno20)
human	human_brain_rep1	20M	ReduceAnno20	IsoQuant	CCC.est	0.989005	IsoQuant(ReduceAnno20)
human	human_brain_rep1	20M	ReduceAnno20	IsoQuant	NRMSE	0.0620813	IsoQuant(ReduceAnno20)
human	human_brain_rep1	20M	ReduceAnno20	IsoQuant	Pearson	0.989082	IsoQuant(ReduceAnno20)
human	human_brain_rep1	20M	ReduceAnno20	IsoQuant	Spearman	0.982553	IsoQuant(ReduceAnno20)
human	human_heart_rep1	20M	FullAnno	IsoQuant	CCC.est	0.989474	IsoQuant(FullAnno)
human	human_heart_rep1	20M	FullAnno	IsoQuant	NRMSE	0.0624424	IsoQuant(FullAnno)
human	human_heart_rep1	20M	FullAnno	IsoQuant	Pearson	0.989627	IsoQuant(FullAnno)
human	human_heart_rep1	20M	FullAnno	IsoQuant	Spearman	0.982557	IsoQuant(FullAnno)
human	human_brain_rep2	3M	FullAnno	ISAtools	CCC.est	0.990242	ISAtools(FullAnno)
human	human_brain_rep2	3M	FullAnno	ISAtools	NRMSE	0.0797294	ISAtools(FullAnno)
human	human_brain_rep2	3M	FullAnno	ISAtools	Pearson	0.991315	ISAtools(FullAnno)
human	human_brain_rep2	3M	FullAnno	ISAtools	Spearman	0.981985	ISAtools(FullAnno)
human	human_brain_rep2	12M	NoAnno	Bambu	CCC.est	0.989893	Bambu(NoAnno)
human	human_brain_rep2	12M	NoAnno	Bambu	NRMSE	0.0559445	Bambu(NoAnno)
human	human_brain_rep2	12M	NoAnno	Bambu	Pearson	0.989955	Bambu(NoAnno)
human	human_brain_rep2	12M	NoAnno	Bambu	Spearman	0.985039	Bambu(NoAnno)
mouse	mouse_heart_rep1	20M	ReduceAnno40	IsoQuant	CCC.est	0.98872	IsoQuant(ReduceAnno40)
mouse	mouse_heart_rep1	20M	ReduceAnno40	IsoQuant	NRMSE	0.0528499	IsoQuant(ReduceAnno40)
mouse	mouse_heart_rep1	20M	ReduceAnno40	IsoQuant	Pearson	0.988768	IsoQuant(ReduceAnno40)
mouse	mouse_heart_rep1	20M	ReduceAnno40	IsoQuant	Spearman	0.982564	IsoQuant(ReduceAnno40)
human	human_brain_rep2	3M	NoAnno	Mandalorion	CCC.est	0.980622	Mandalorion(NoAnno)
human	human_brain_rep2	3M	NoAnno	Mandalorion	NRMSE	0.0825105	Mandalorion(NoAnno)
human	human_brain_rep2	3M	NoAnno	Mandalorion	Pearson	0.991095	Mandalorion(NoAnno)
human	human_brain_rep2	3M	NoAnno	Mandalorion	Spearman	0.982032	Mandalorion(NoAnno)
human	human_heart_rep2	12M	ReduceAnno20	ISAtools	CCC.est	0.990374	ISAtools(ReduceAnno20)
human	human_heart_rep2	12M	ReduceAnno20	ISAtools	NRMSE	0.0597209	ISAtools(ReduceAnno20)
human	human_heart_rep2	12M	ReduceAnno20	ISAtools	Pearson	0.991339	ISAtools(ReduceAnno20)
human	human_heart_rep2	12M	ReduceAnno20	ISAtools	Spearman	0.977821	ISAtools(ReduceAnno20)
mouse	mouse_brain_rep1	6M	ReduceAnno40	ISAtools	CCC.est	0.99042	ISAtools(ReduceAnno40)
mouse	mouse_brain_rep1	6M	ReduceAnno40	ISAtools	NRMSE	0.0630979	ISAtools(ReduceAnno40)
mouse	mouse_brain_rep1	6M	ReduceAnno40	ISAtools	Pearson	0.991365	ISAtools(ReduceAnno40)
mouse	mouse_brain_rep1	6M	ReduceAnno40	ISAtools	Spearman	0.983469	ISAtools(ReduceAnno40)
human	human_heart_rep2	12M	FullAnno	IsoQuant	CCC.est	0.988979	IsoQuant(FullAnno)
human	human_heart_rep2	12M	FullAnno	IsoQuant	NRMSE	0.0636859	IsoQuant(FullAnno)
human	human_heart_rep2	12M	FullAnno	IsoQuant	Pearson	0.989141	IsoQuant(FullAnno)
human	human_heart_rep2	12M	FullAnno	IsoQuant	Spearman	0.982701	IsoQuant(FullAnno)
human	human_brain_rep2	12M	ReduceAnno40	IsoQuant	CCC.est	0.989239	IsoQuant(ReduceAnno40)
human	human_brain_rep2	12M	ReduceAnno40	IsoQuant	NRMSE	0.0584538	IsoQuant(ReduceAnno40)
human	human_brain_rep2	12M	ReduceAnno40	IsoQuant	Pearson	0.98931	IsoQuant(ReduceAnno40)
human	human_brain_rep2	12M	ReduceAnno40	IsoQuant	Spearman	0.982914	IsoQuant(ReduceAnno40)
mouse	mouse_heart_rep1	12M	FullAnno	IsoQuant	CCC.est	0.989789	IsoQuant(FullAnno)
mouse	mouse_heart_rep1	12M	FullAnno	IsoQuant	NRMSE	0.0561351	IsoQuant(FullAnno)
mouse	mouse_heart_rep1	12M	FullAnno	IsoQuant	Pearson	0.989981	IsoQuant(FullAnno)
mouse	mouse_heart_rep1	12M	FullAnno	IsoQuant	Spearman	0.982953	IsoQuant(FullAnno)
mouse	mouse_brain_rep1	20M	ReduceAnno40	IsoQuant	CCC.est	0.987172	IsoQuant(ReduceAnno40)
mouse	mouse_brain_rep1	20M	ReduceAnno40	IsoQuant	NRMSE	0.0562726	IsoQuant(ReduceAnno40)
mouse	mouse_brain_rep1	20M	ReduceAnno40	IsoQuant	Pearson	0.98726	IsoQuant(ReduceAnno40)
mouse	mouse_brain_rep1	20M	ReduceAnno40	IsoQuant	Spearman	0.983119	IsoQuant(ReduceAnno40)
mouse	mouse_heart_rep1	3M	NoAnno	Bambu	CCC.est	0.993844	Bambu(NoAnno)
mouse	mouse_heart_rep1	3M	NoAnno	Bambu	NRMSE	0.0564252	Bambu(NoAnno)
mouse	mouse_heart_rep1	3M	NoAnno	Bambu	Pearson	0.993863	Bambu(NoAnno)
mouse	mouse_heart_rep1	3M	NoAnno	Bambu	Spearman	0.990388	Bambu(NoAnno)
human	human_heart_rep1	12M	ReduceAnno20	IsoQuant	CCC.est	0.987337	IsoQuant(ReduceAnno20)
human	human_heart_rep1	12M	ReduceAnno20	IsoQuant	NRMSE	0.0764498	IsoQuant(ReduceAnno20)
human	human_heart_rep1	12M	ReduceAnno20	IsoQuant	Pearson	0.987397	IsoQuant(ReduceAnno20)
human	human_heart_rep1	12M	ReduceAnno20	IsoQuant	Spearman	0.983153	IsoQuant(ReduceAnno20)
human	human_heart_rep1	12M	FullAnno	IsoQuant	CCC.est	0.989027	IsoQuant(FullAnno)
human	human_heart_rep1	12M	FullAnno	IsoQuant	NRMSE	0.071365	IsoQuant(FullAnno)
human	human_heart_rep1	12M	FullAnno	IsoQuant	Pearson	0.989171	IsoQuant(FullAnno)
human	human_heart_rep1	12M	FullAnno	IsoQuant	Spearman	0.983251	IsoQuant(FullAnno)
human	human_heart_rep2	12M	NoAnno	ISAtools	CCC.est	0.990579	ISAtools(NoAnno)
human	human_heart_rep2	12M	NoAnno	ISAtools	NRMSE	0.0591953	ISAtools(NoAnno)
human	human_heart_rep2	12M	NoAnno	ISAtools	Pearson	0.991392	ISAtools(NoAnno)
human	human_heart_rep2	12M	NoAnno	ISAtools	Spearman	0.979181	ISAtools(NoAnno)
mouse	mouse_brain_rep2	20M	ReduceAnno40	IsoQuant	CCC.est	0.987491	IsoQuant(ReduceAnno40)
mouse	mouse_brain_rep2	20M	ReduceAnno40	IsoQuant	NRMSE	0.0554391	IsoQuant(ReduceAnno40)
mouse	mouse_brain_rep2	20M	ReduceAnno40	IsoQuant	Pearson	0.987553	IsoQuant(ReduceAnno40)
mouse	mouse_brain_rep2	20M	ReduceAnno40	IsoQuant	Spearman	0.983343	IsoQuant(ReduceAnno40)
human	human_heart_rep1	20M	ReduceAnno40	IsoQuant	CCC.est	0.988179	IsoQuant(ReduceAnno40)
human	human_heart_rep1	20M	ReduceAnno40	IsoQuant	NRMSE	0.0660003	IsoQuant(ReduceAnno40)
human	human_heart_rep1	20M	ReduceAnno40	IsoQuant	Pearson	0.988233	IsoQuant(ReduceAnno40)
human	human_heart_rep1	20M	ReduceAnno40	IsoQuant	Spearman	0.983375	IsoQuant(ReduceAnno40)
human	human_brain_rep1	12M	NoAnno	ISAtools	CCC.est	0.990502	ISAtools(NoAnno)
human	human_brain_rep1	12M	NoAnno	ISAtools	NRMSE	0.0655382	ISAtools(NoAnno)
human	human_brain_rep1	12M	NoAnno	ISAtools	Pearson	0.991395	ISAtools(NoAnno)
human	human_brain_rep1	12M	NoAnno	ISAtools	Spearman	0.976745	ISAtools(NoAnno)
human	human_heart_rep2	3M	ReduceAnno40	Mandalorion	CCC.est	0.983416	Mandalorion(ReduceAnno40)
human	human_heart_rep2	3M	ReduceAnno40	Mandalorion	NRMSE	0.0801941	Mandalorion(ReduceAnno40)
human	human_heart_rep2	3M	ReduceAnno40	Mandalorion	Pearson	0.992107	Mandalorion(ReduceAnno40)
human	human_heart_rep2	3M	ReduceAnno40	Mandalorion	Spearman	0.982282	Mandalorion(ReduceAnno40)
mouse	mouse_brain_rep2	3M	FullAnno	Bambu	CCC.est	0.995063	Bambu(FullAnno)
mouse	mouse_brain_rep2	3M	FullAnno	Bambu	NRMSE	0.0568299	Bambu(FullAnno)
mouse	mouse_brain_rep2	3M	FullAnno	Bambu	Pearson	0.99509	Bambu(FullAnno)
mouse	mouse_brain_rep2	3M	FullAnno	Bambu	Spearman	0.99175	Bambu(FullAnno)
human	human_heart_rep2	20M	ReduceAnno20	Mandalorion	CCC.est	0.987185	Mandalorion(ReduceAnno20)
human	human_heart_rep2	20M	ReduceAnno20	Mandalorion	NRMSE	0.0615873	Mandalorion(ReduceAnno20)
human	human_heart_rep2	20M	ReduceAnno20	Mandalorion	Pearson	0.994108	Mandalorion(ReduceAnno20)
human	human_heart_rep2	20M	ReduceAnno20	Mandalorion	Spearman	0.982354	Mandalorion(ReduceAnno20)
human	human_heart_rep2	20M	ReduceAnno40	Mandalorion	CCC.est	0.987313	Mandalorion(ReduceAnno40)
human	human_heart_rep2	20M	ReduceAnno40	Mandalorion	NRMSE	0.0613128	Mandalorion(ReduceAnno40)
human	human_heart_rep2	20M	ReduceAnno40	Mandalorion	Pearson	0.994106	Mandalorion(ReduceAnno40)
human	human_heart_rep2	20M	ReduceAnno40	Mandalorion	Spearman	0.982623	Mandalorion(ReduceAnno40)
mouse	mouse_brain_rep1	12M	FullAnno	IsoQuant	CCC.est	0.989173	IsoQuant(FullAnno)
mouse	mouse_brain_rep1	12M	FullAnno	IsoQuant	NRMSE	0.0574742	IsoQuant(FullAnno)
mouse	mouse_brain_rep1	12M	FullAnno	IsoQuant	Pearson	0.989383	IsoQuant(FullAnno)
mouse	mouse_brain_rep1	12M	FullAnno	IsoQuant	Spearman	0.98351	IsoQuant(FullAnno)
human	human_heart_rep2	3M	ReduceAnno20	ISAtools	CCC.est	0.990863	ISAtools(ReduceAnno20)
human	human_heart_rep2	3M	ReduceAnno20	ISAtools	NRMSE	0.0794187	ISAtools(ReduceAnno20)
human	human_heart_rep2	3M	ReduceAnno20	ISAtools	Pearson	0.991417	ISAtools(ReduceAnno20)
human	human_heart_rep2	3M	ReduceAnno20	ISAtools	Spearman	0.981837	ISAtools(ReduceAnno20)
human	human_heart_rep2	12M	ReduceAnno40	IsoQuant	CCC.est	0.988703	IsoQuant(ReduceAnno40)
human	human_heart_rep2	12M	ReduceAnno40	IsoQuant	NRMSE	0.0643996	IsoQuant(ReduceAnno40)
human	human_heart_rep2	12M	ReduceAnno40	IsoQuant	Pearson	0.988761	IsoQuant(ReduceAnno40)
human	human_heart_rep2	12M	ReduceAnno40	IsoQuant	Spearman	0.983622	IsoQuant(ReduceAnno40)
mouse	mouse_heart_rep2	12M	ReduceAnno40	IsoQuant	CCC.est	0.988707	IsoQuant(ReduceAnno40)
mouse	mouse_heart_rep2	12M	ReduceAnno40	IsoQuant	NRMSE	0.0584814	IsoQuant(ReduceAnno40)
mouse	mouse_heart_rep2	12M	ReduceAnno40	IsoQuant	Pearson	0.988747	IsoQuant(ReduceAnno40)
mouse	mouse_heart_rep2	12M	ReduceAnno40	IsoQuant	Spearman	0.98376	IsoQuant(ReduceAnno40)
mouse	mouse_brain_rep1	12M	FullAnno	ISAtools	CCC.est	0.990045	ISAtools(FullAnno)
mouse	mouse_brain_rep1	12M	FullAnno	ISAtools	NRMSE	0.0552465	ISAtools(FullAnno)
mouse	mouse_brain_rep1	12M	FullAnno	ISAtools	Pearson	0.991433	ISAtools(FullAnno)
mouse	mouse_brain_rep1	12M	FullAnno	ISAtools	Spearman	0.981464	ISAtools(FullAnno)
mouse	mouse_brain_rep2	12M	FullAnno	IsoQuant	CCC.est	0.988942	IsoQuant(FullAnno)
mouse	mouse_brain_rep2	12M	FullAnno	IsoQuant	NRMSE	0.0587383	IsoQuant(FullAnno)
mouse	mouse_brain_rep2	12M	FullAnno	IsoQuant	Pearson	0.989122	IsoQuant(FullAnno)
mouse	mouse_brain_rep2	12M	FullAnno	IsoQuant	Spearman	0.983768	IsoQuant(FullAnno)
human	human_heart_rep1	3M	FullAnno	Mandalorion	CCC.est	0.982769	Mandalorion(FullAnno)
human	human_heart_rep1	3M	FullAnno	Mandalorion	NRMSE	0.0804946	Mandalorion(FullAnno)
human	human_heart_rep1	3M	FullAnno	Mandalorion	Pearson	0.99157	Mandalorion(FullAnno)
human	human_heart_rep1	3M	FullAnno	Mandalorion	Spearman	0.982758	Mandalorion(FullAnno)
mouse	mouse_brain_rep1	3M	NoAnno	Bambu	CCC.est	0.993501	Bambu(NoAnno)
mouse	mouse_brain_rep1	3M	NoAnno	Bambu	NRMSE	0.0574193	Bambu(NoAnno)
mouse	mouse_brain_rep1	3M	NoAnno	Bambu	Pearson	0.993503	Bambu(NoAnno)
mouse	mouse_brain_rep1	3M	NoAnno	Bambu	Spearman	0.992609	Bambu(NoAnno)
mouse	mouse_brain_rep1	12M	ReduceAnno20	IsoQuant	CCC.est	0.988748	IsoQuant(ReduceAnno20)
mouse	mouse_brain_rep1	12M	ReduceAnno20	IsoQuant	NRMSE	0.0582932	IsoQuant(ReduceAnno20)
mouse	mouse_brain_rep1	12M	ReduceAnno20	IsoQuant	Pearson	0.988832	IsoQuant(ReduceAnno20)
mouse	mouse_brain_rep1	12M	ReduceAnno20	IsoQuant	Spearman	0.983976	IsoQuant(ReduceAnno20)
human	human_brain_rep1	20M	ReduceAnno40	IsoQuant	CCC.est	0.989929	IsoQuant(ReduceAnno40)
human	human_brain_rep1	20M	ReduceAnno40	IsoQuant	NRMSE	0.0594716	IsoQuant(ReduceAnno40)
human	human_brain_rep1	20M	ReduceAnno40	IsoQuant	Pearson	0.989985	IsoQuant(ReduceAnno40)
human	human_brain_rep1	20M	ReduceAnno40	IsoQuant	Spearman	0.983985	IsoQuant(ReduceAnno40)
human	human_brain_rep1	20M	FullAnno	Mandalorion	CCC.est	0.986943	Mandalorion(FullAnno)
human	human_brain_rep1	20M	FullAnno	Mandalorion	NRMSE	0.0683287	Mandalorion(FullAnno)
human	human_brain_rep1	20M	FullAnno	Mandalorion	Pearson	0.994305	Mandalorion(FullAnno)
human	human_brain_rep1	20M	FullAnno	Mandalorion	Spearman	0.982763	Mandalorion(FullAnno)
human	human_heart_rep1	3M	ReduceAnno20	Mandalorion	CCC.est	0.982868	Mandalorion(ReduceAnno20)
human	human_heart_rep1	3M	ReduceAnno20	Mandalorion	NRMSE	0.0801736	Mandalorion(ReduceAnno20)
human	human_heart_rep1	3M	ReduceAnno20	Mandalorion	Pearson	0.991626	Mandalorion(ReduceAnno20)
human	human_heart_rep1	3M	ReduceAnno20	Mandalorion	Spearman	0.98302	Mandalorion(ReduceAnno20)
human	human_heart_rep1	20M	ReduceAnno40	ISAtools	CCC.est	0.990727	ISAtools(ReduceAnno40)
human	human_heart_rep1	20M	ReduceAnno40	ISAtools	NRMSE	0.0587953	ISAtools(ReduceAnno40)
human	human_heart_rep1	20M	ReduceAnno40	ISAtools	Pearson	0.99159	ISAtools(ReduceAnno40)
human	human_heart_rep1	20M	ReduceAnno40	ISAtools	Spearman	0.979304	ISAtools(ReduceAnno40)
human	human_heart_rep2	6M	ReduceAnno20	IsoQuant	CCC.est	0.988519	IsoQuant(ReduceAnno20)
human	human_heart_rep2	6M	ReduceAnno20	IsoQuant	NRMSE	0.0750486	IsoQuant(ReduceAnno20)
human	human_heart_rep2	6M	ReduceAnno20	IsoQuant	Pearson	0.988576	IsoQuant(ReduceAnno20)
human	human_heart_rep2	6M	ReduceAnno20	IsoQuant	Spearman	0.984133	IsoQuant(ReduceAnno20)
human	human_brain_rep1	20M	ReduceAnno20	Mandalorion	CCC.est	0.987081	Mandalorion(ReduceAnno20)
human	human_brain_rep1	20M	ReduceAnno20	Mandalorion	NRMSE	0.0679552	Mandalorion(ReduceAnno20)
human	human_brain_rep1	20M	ReduceAnno20	Mandalorion	Pearson	0.994349	Mandalorion(ReduceAnno20)
human	human_brain_rep1	20M	ReduceAnno20	Mandalorion	Spearman	0.983082	Mandalorion(ReduceAnno20)
human	human_brain_rep1	12M	ReduceAnno20	IsoQuant	CCC.est	0.989582	IsoQuant(ReduceAnno20)
human	human_brain_rep1	12M	ReduceAnno20	IsoQuant	NRMSE	0.0678824	IsoQuant(ReduceAnno20)
human	human_brain_rep1	12M	ReduceAnno20	IsoQuant	Pearson	0.989647	IsoQuant(ReduceAnno20)
human	human_brain_rep1	12M	ReduceAnno20	IsoQuant	Spearman	0.984194	IsoQuant(ReduceAnno20)
human	human_brain_rep1	6M	FullAnno	Mandalorion	CCC.est	0.983722	Mandalorion(FullAnno)
human	human_brain_rep1	6M	FullAnno	Mandalorion	NRMSE	0.0782006	Mandalorion(FullAnno)
human	human_brain_rep1	6M	FullAnno	Mandalorion	Pearson	0.992886	Mandalorion(FullAnno)
human	human_brain_rep1	6M	FullAnno	Mandalorion	Spearman	0.983157	Mandalorion(FullAnno)
human	human_heart_rep1	12M	ReduceAnno40	IsoQuant	CCC.est	0.987918	IsoQuant(ReduceAnno40)
human	human_heart_rep1	12M	ReduceAnno40	IsoQuant	NRMSE	0.074621	IsoQuant(ReduceAnno40)
human	human_heart_rep1	12M	ReduceAnno40	IsoQuant	Pearson	0.98796	IsoQuant(ReduceAnno40)
human	human_heart_rep1	12M	ReduceAnno40	IsoQuant	Spearman	0.984256	IsoQuant(ReduceAnno40)
human	human_brain_rep2	3M	NoAnno	ISAtools	CCC.est	0.991386	ISAtools(NoAnno)
human	human_brain_rep2	3M	NoAnno	ISAtools	NRMSE	0.0728927	ISAtools(NoAnno)
human	human_brain_rep2	3M	NoAnno	ISAtools	Pearson	0.991653	ISAtools(NoAnno)
human	human_brain_rep2	3M	NoAnno	ISAtools	Spearman	0.986695	ISAtools(NoAnno)
human	human_heart_rep1	3M	ReduceAnno40	Mandalorion	CCC.est	0.983009	Mandalorion(ReduceAnno40)
human	human_heart_rep1	3M	ReduceAnno40	Mandalorion	NRMSE	0.0798055	Mandalorion(ReduceAnno40)
human	human_heart_rep1	3M	ReduceAnno40	Mandalorion	Pearson	0.991625	Mandalorion(ReduceAnno40)
human	human_heart_rep1	3M	ReduceAnno40	Mandalorion	Spearman	0.983199	Mandalorion(ReduceAnno40)
human	human_heart_rep1	20M	ReduceAnno20	ISAtools	CCC.est	0.990764	ISAtools(ReduceAnno20)
human	human_heart_rep1	20M	ReduceAnno20	ISAtools	NRMSE	0.0586567	ISAtools(ReduceAnno20)
human	human_heart_rep1	20M	ReduceAnno20	ISAtools	Pearson	0.991659	ISAtools(ReduceAnno20)
human	human_heart_rep1	20M	ReduceAnno20	ISAtools	Spearman	0.979135	ISAtools(ReduceAnno20)
human	human_heart_rep2	12M	FullAnno	Mandalorion	CCC.est	0.986496	Mandalorion(FullAnno)
human	human_heart_rep2	12M	FullAnno	Mandalorion	NRMSE	0.0707939	Mandalorion(FullAnno)
human	human_heart_rep2	12M	FullAnno	Mandalorion	Pearson	0.994082	Mandalorion(FullAnno)
human	human_heart_rep2	12M	FullAnno	Mandalorion	Spearman	0.983238	Mandalorion(FullAnno)
mouse	mouse_heart_rep1	12M	ReduceAnno40	IsoQuant	CCC.est	0.989691	IsoQuant(ReduceAnno40)
mouse	mouse_heart_rep1	12M	ReduceAnno40	IsoQuant	NRMSE	0.0558992	IsoQuant(ReduceAnno40)
mouse	mouse_heart_rep1	12M	ReduceAnno40	IsoQuant	Pearson	0.98973	IsoQuant(ReduceAnno40)
mouse	mouse_heart_rep1	12M	ReduceAnno40	IsoQuant	Spearman	0.984601	IsoQuant(ReduceAnno40)
human	human_brain_rep1	12M	FullAnno	IsoQuant	CCC.est	0.991041	IsoQuant(FullAnno)
human	human_brain_rep1	12M	FullAnno	IsoQuant	NRMSE	0.0629625	IsoQuant(FullAnno)
human	human_brain_rep1	12M	FullAnno	IsoQuant	Pearson	0.991177	IsoQuant(FullAnno)
human	human_brain_rep1	12M	FullAnno	IsoQuant	Spearman	0.984748	IsoQuant(FullAnno)
human	human_heart_rep2	6M	NoAnno	ISAtools	CCC.est	0.991083	ISAtools(NoAnno)
human	human_heart_rep2	6M	NoAnno	ISAtools	NRMSE	0.0660654	ISAtools(NoAnno)
human	human_heart_rep2	6M	NoAnno	ISAtools	Pearson	0.991665	ISAtools(NoAnno)
human	human_heart_rep2	6M	NoAnno	ISAtools	Spearman	0.979026	ISAtools(NoAnno)
human	human_brain_rep1	12M	FullAnno	ISAtools	CCC.est	0.990338	ISAtools(FullAnno)
human	human_brain_rep1	12M	FullAnno	ISAtools	NRMSE	0.0656192	ISAtools(FullAnno)
human	human_brain_rep1	12M	FullAnno	ISAtools	Pearson	0.991706	ISAtools(FullAnno)
human	human_brain_rep1	12M	FullAnno	ISAtools	Spearman	0.977741	ISAtools(FullAnno)
mouse	mouse_brain_rep2	12M	ReduceAnno20	IsoQuant	CCC.est	0.989271	IsoQuant(ReduceAnno20)
mouse	mouse_brain_rep2	12M	ReduceAnno20	IsoQuant	NRMSE	0.0575795	IsoQuant(ReduceAnno20)
mouse	mouse_brain_rep2	12M	ReduceAnno20	IsoQuant	Pearson	0.989348	IsoQuant(ReduceAnno20)
mouse	mouse_brain_rep2	12M	ReduceAnno20	IsoQuant	Spearman	0.984837	IsoQuant(ReduceAnno20)
human	human_brain_rep2	6M	ReduceAnno20	IsoQuant	CCC.est	0.989998	IsoQuant(ReduceAnno20)
human	human_brain_rep2	6M	ReduceAnno20	IsoQuant	NRMSE	0.0671594	IsoQuant(ReduceAnno20)
human	human_brain_rep2	6M	ReduceAnno20	IsoQuant	Pearson	0.990061	IsoQuant(ReduceAnno20)
human	human_brain_rep2	6M	ReduceAnno20	IsoQuant	Spearman	0.984862	IsoQuant(ReduceAnno20)
human	human_heart_rep2	6M	FullAnno	IsoQuant	CCC.est	0.989818	IsoQuant(FullAnno)
human	human_heart_rep2	6M	FullAnno	IsoQuant	NRMSE	0.0707416	IsoQuant(FullAnno)
human	human_heart_rep2	6M	FullAnno	IsoQuant	Pearson	0.989952	IsoQuant(FullAnno)
human	human_heart_rep2	6M	FullAnno	IsoQuant	Spearman	0.984907	IsoQuant(FullAnno)
human	human_brain_rep2	6M	FullAnno	IsoQuant	CCC.est	0.990904	IsoQuant(FullAnno)
human	human_brain_rep2	6M	FullAnno	IsoQuant	NRMSE	0.0641527	IsoQuant(FullAnno)
human	human_brain_rep2	6M	FullAnno	IsoQuant	Pearson	0.991038	IsoQuant(FullAnno)
human	human_brain_rep2	6M	FullAnno	IsoQuant	Spearman	0.985101	IsoQuant(FullAnno)
human	human_heart_rep2	20M	NoAnno	IsoQuant	CCC.est	0.989777	IsoQuant(NoAnno)
human	human_heart_rep2	20M	NoAnno	IsoQuant	NRMSE	0.0537823	IsoQuant(NoAnno)
human	human_heart_rep2	20M	NoAnno	IsoQuant	Pearson	0.989838	IsoQuant(NoAnno)
human	human_heart_rep2	20M	NoAnno	IsoQuant	Spearman	0.985182	IsoQuant(NoAnno)
mouse	mouse_brain_rep2	20M	FullAnno	ISAtools	CCC.est	0.990565	ISAtools(FullAnno)
mouse	mouse_brain_rep2	20M	FullAnno	ISAtools	NRMSE	0.048628	ISAtools(FullAnno)
mouse	mouse_brain_rep2	20M	FullAnno	ISAtools	Pearson	0.99172	ISAtools(FullAnno)
mouse	mouse_brain_rep2	20M	FullAnno	ISAtools	Spearman	0.981122	ISAtools(FullAnno)
human	human_heart_rep2	20M	NoAnno	ISAtools	CCC.est	0.990934	ISAtools(NoAnno)
human	human_heart_rep2	20M	NoAnno	ISAtools	NRMSE	0.0514893	ISAtools(NoAnno)
human	human_heart_rep2	20M	NoAnno	ISAtools	Pearson	0.991749	ISAtools(NoAnno)
human	human_heart_rep2	20M	NoAnno	ISAtools	Spearman	0.97694	ISAtools(NoAnno)
human	human_brain_rep2	12M	NoAnno	IsoQuant	CCC.est	0.990314	IsoQuant(NoAnno)
human	human_brain_rep2	12M	NoAnno	IsoQuant	NRMSE	0.0552323	IsoQuant(NoAnno)
human	human_brain_rep2	12M	NoAnno	IsoQuant	Pearson	0.990365	IsoQuant(NoAnno)
human	human_brain_rep2	12M	NoAnno	IsoQuant	Spearman	0.985339	IsoQuant(NoAnno)
human	human_brain_rep1	12M	ReduceAnno40	IsoQuant	CCC.est	0.990485	IsoQuant(ReduceAnno40)
human	human_brain_rep1	12M	ReduceAnno40	IsoQuant	NRMSE	0.0648642	IsoQuant(ReduceAnno40)
human	human_brain_rep1	12M	ReduceAnno40	IsoQuant	Pearson	0.99053	IsoQuant(ReduceAnno40)
human	human_brain_rep1	12M	ReduceAnno40	IsoQuant	Spearman	0.985475	IsoQuant(ReduceAnno40)
human	human_brain_rep1	6M	ReduceAnno20	ISAtools	CCC.est	0.991149	ISAtools(ReduceAnno20)
human	human_brain_rep1	6M	ReduceAnno20	ISAtools	NRMSE	0.0783631	ISAtools(ReduceAnno20)
human	human_brain_rep1	6M	ReduceAnno20	ISAtools	Pearson	0.991781	ISAtools(ReduceAnno20)
human	human_brain_rep1	6M	ReduceAnno20	ISAtools	Spearman	0.984802	ISAtools(ReduceAnno20)
human	human_brain_rep1	6M	ReduceAnno20	Mandalorion	CCC.est	0.983762	Mandalorion(ReduceAnno20)
human	human_brain_rep1	6M	ReduceAnno20	Mandalorion	NRMSE	0.0781046	Mandalorion(ReduceAnno20)
human	human_brain_rep1	6M	ReduceAnno20	Mandalorion	Pearson	0.992854	Mandalorion(ReduceAnno20)
human	human_brain_rep1	6M	ReduceAnno20	Mandalorion	Spearman	0.98329	Mandalorion(ReduceAnno20)
mouse	mouse_brain_rep1	12M	NoAnno	ISAtools	CCC.est	0.991039	ISAtools(NoAnno)
mouse	mouse_brain_rep1	12M	NoAnno	ISAtools	NRMSE	0.052317	ISAtools(NoAnno)
mouse	mouse_brain_rep1	12M	NoAnno	ISAtools	Pearson	0.991956	ISAtools(NoAnno)
mouse	mouse_brain_rep1	12M	NoAnno	ISAtools	Spearman	0.983443	ISAtools(NoAnno)
mouse	mouse_brain_rep1	12M	ReduceAnno40	IsoQuant	CCC.est	0.989339	IsoQuant(ReduceAnno40)
mouse	mouse_brain_rep1	12M	ReduceAnno40	IsoQuant	NRMSE	0.0565796	IsoQuant(ReduceAnno40)
mouse	mouse_brain_rep1	12M	ReduceAnno40	IsoQuant	Pearson	0.989409	IsoQuant(ReduceAnno40)
mouse	mouse_brain_rep1	12M	ReduceAnno40	IsoQuant	Spearman	0.985559	IsoQuant(ReduceAnno40)
human	human_heart_rep2	6M	ReduceAnno40	IsoQuant	CCC.est	0.98991	IsoQuant(ReduceAnno40)
human	human_heart_rep2	6M	ReduceAnno40	IsoQuant	NRMSE	0.070292	IsoQuant(ReduceAnno40)
human	human_heart_rep2	6M	ReduceAnno40	IsoQuant	Pearson	0.989948	IsoQuant(ReduceAnno40)
human	human_heart_rep2	6M	ReduceAnno40	IsoQuant	Spearman	0.985791	IsoQuant(ReduceAnno40)
mouse	mouse_heart_rep1	6M	ReduceAnno20	IsoQuant	CCC.est	0.98941	IsoQuant(ReduceAnno20)
mouse	mouse_heart_rep1	6M	ReduceAnno20	IsoQuant	NRMSE	0.0677665	IsoQuant(ReduceAnno20)
mouse	mouse_heart_rep1	6M	ReduceAnno20	IsoQuant	Pearson	0.98944	IsoQuant(ReduceAnno20)
mouse	mouse_heart_rep1	6M	ReduceAnno20	IsoQuant	Spearman	0.985872	IsoQuant(ReduceAnno20)
human	human_brain_rep1	6M	ReduceAnno40	ISAtools	CCC.est	0.99146	ISAtools(ReduceAnno40)
human	human_brain_rep1	6M	ReduceAnno40	ISAtools	NRMSE	0.0766381	ISAtools(ReduceAnno40)
human	human_brain_rep1	6M	ReduceAnno40	ISAtools	Pearson	0.991989	ISAtools(ReduceAnno40)
human	human_brain_rep1	6M	ReduceAnno40	ISAtools	Spearman	0.985619	ISAtools(ReduceAnno40)
mouse	mouse_heart_rep2	3M	FullAnno	Bambu	CCC.est	0.993877	Bambu(FullAnno)
mouse	mouse_heart_rep2	3M	FullAnno	Bambu	NRMSE	0.0593556	Bambu(FullAnno)
mouse	mouse_heart_rep2	3M	FullAnno	Bambu	Pearson	0.993913	Bambu(FullAnno)
mouse	mouse_heart_rep2	3M	FullAnno	Bambu	Spearman	0.987727	Bambu(FullAnno)
human	human_brain_rep1	20M	ReduceAnno40	Mandalorion	CCC.est	0.987296	Mandalorion(ReduceAnno40)
human	human_brain_rep1	20M	ReduceAnno40	Mandalorion	NRMSE	0.0674245	Mandalorion(ReduceAnno40)
human	human_brain_rep1	20M	ReduceAnno40	Mandalorion	Pearson	0.994452	Mandalorion(ReduceAnno40)
human	human_brain_rep1	20M	ReduceAnno40	Mandalorion	Spearman	0.983399	Mandalorion(ReduceAnno40)
human	human_heart_rep1	12M	ReduceAnno40	ISAtools	CCC.est	0.991257	ISAtools(ReduceAnno40)
human	human_heart_rep1	12M	ReduceAnno40	ISAtools	NRMSE	0.0637997	ISAtools(ReduceAnno40)
human	human_heart_rep1	12M	ReduceAnno40	ISAtools	Pearson	0.992028	ISAtools(ReduceAnno40)
human	human_heart_rep1	12M	ReduceAnno40	ISAtools	Spearman	0.980905	ISAtools(ReduceAnno40)
mouse	mouse_brain_rep2	20M	ReduceAnno40	ISAtools	CCC.est	0.991137	ISAtools(ReduceAnno40)
mouse	mouse_brain_rep2	20M	ReduceAnno40	ISAtools	NRMSE	0.0470438	ISAtools(ReduceAnno40)
mouse	mouse_brain_rep2	20M	ReduceAnno40	ISAtools	Pearson	0.992042	ISAtools(ReduceAnno40)
mouse	mouse_brain_rep2	20M	ReduceAnno40	ISAtools	Spearman	0.982452	ISAtools(ReduceAnno40)
human	human_heart_rep2	3M	ReduceAnno20	IsoQuant	CCC.est	0.989113	IsoQuant(ReduceAnno20)
human	human_heart_rep2	3M	ReduceAnno20	IsoQuant	NRMSE	0.0871097	IsoQuant(ReduceAnno20)
human	human_heart_rep2	3M	ReduceAnno20	IsoQuant	Pearson	0.989138	IsoQuant(ReduceAnno20)
human	human_heart_rep2	3M	ReduceAnno20	IsoQuant	Spearman	0.985908	IsoQuant(ReduceAnno20)
human	human_brain_rep2	6M	ReduceAnno40	IsoQuant	CCC.est	0.990165	IsoQuant(ReduceAnno40)
human	human_brain_rep2	6M	ReduceAnno40	IsoQuant	NRMSE	0.066458	IsoQuant(ReduceAnno40)
human	human_brain_rep2	6M	ReduceAnno40	IsoQuant	Pearson	0.990211	IsoQuant(ReduceAnno40)
human	human_brain_rep2	6M	ReduceAnno40	IsoQuant	Spearman	0.985931	IsoQuant(ReduceAnno40)
human	human_heart_rep2	6M	NoAnno	Bambu	CCC.est	0.99226	Bambu(NoAnno)
human	human_heart_rep2	6M	NoAnno	Bambu	NRMSE	0.059494	Bambu(NoAnno)
human	human_heart_rep2	6M	NoAnno	Bambu	Pearson	0.992276	Bambu(NoAnno)
human	human_heart_rep2	6M	NoAnno	Bambu	Spearman	0.988468	Bambu(NoAnno)
human	human_brain_rep1	12M	NoAnno	Bambu	CCC.est	0.99157	Bambu(NoAnno)
human	human_brain_rep1	12M	NoAnno	Bambu	NRMSE	0.0595543	Bambu(NoAnno)
human	human_brain_rep1	12M	NoAnno	Bambu	Pearson	0.99159	Bambu(NoAnno)
human	human_brain_rep1	12M	NoAnno	Bambu	Spearman	0.987824	Bambu(NoAnno)
human	human_heart_rep2	12M	ReduceAnno20	Mandalorion	CCC.est	0.986599	Mandalorion(ReduceAnno20)
human	human_heart_rep2	12M	ReduceAnno20	Mandalorion	NRMSE	0.0704707	Mandalorion(ReduceAnno20)
human	human_heart_rep2	12M	ReduceAnno20	Mandalorion	Pearson	0.994107	Mandalorion(ReduceAnno20)
human	human_heart_rep2	12M	ReduceAnno20	Mandalorion	Spearman	0.983523	Mandalorion(ReduceAnno20)
mouse	mouse_brain_rep1	6M	FullAnno	ISAtools	CCC.est	0.99077	ISAtools(FullAnno)
mouse	mouse_brain_rep1	6M	FullAnno	ISAtools	NRMSE	0.0621182	ISAtools(FullAnno)
mouse	mouse_brain_rep1	6M	FullAnno	ISAtools	Pearson	0.992045	ISAtools(FullAnno)
mouse	mouse_brain_rep1	6M	FullAnno	ISAtools	Spearman	0.98371	ISAtools(FullAnno)
mouse	mouse_brain_rep2	12M	NoAnno	ISAtools	CCC.est	0.991242	ISAtools(NoAnno)
mouse	mouse_brain_rep2	12M	NoAnno	ISAtools	NRMSE	0.0520113	ISAtools(NoAnno)
mouse	mouse_brain_rep2	12M	NoAnno	ISAtools	Pearson	0.992052	ISAtools(NoAnno)
mouse	mouse_brain_rep2	12M	NoAnno	ISAtools	Spearman	0.984392	ISAtools(NoAnno)
human	human_heart_rep2	6M	FullAnno	ISAtools	CCC.est	0.990985	ISAtools(FullAnno)
human	human_heart_rep2	6M	FullAnno	ISAtools	NRMSE	0.0666965	ISAtools(FullAnno)
human	human_heart_rep2	6M	FullAnno	ISAtools	Pearson	0.992119	ISAtools(FullAnno)
human	human_heart_rep2	6M	FullAnno	ISAtools	Spearman	0.979728	ISAtools(FullAnno)
human	human_heart_rep2	3M	NoAnno	Mandalorion	CCC.est	0.984245	Mandalorion(NoAnno)
human	human_heart_rep2	3M	NoAnno	Mandalorion	NRMSE	0.0778822	Mandalorion(NoAnno)
human	human_heart_rep2	3M	NoAnno	Mandalorion	Pearson	0.99259	Mandalorion(NoAnno)
human	human_heart_rep2	3M	NoAnno	Mandalorion	Spearman	0.983665	Mandalorion(NoAnno)
mouse	mouse_brain_rep2	12M	ReduceAnno40	IsoQuant	CCC.est	0.989744	IsoQuant(ReduceAnno40)
mouse	mouse_brain_rep2	12M	ReduceAnno40	IsoQuant	NRMSE	0.0559548	IsoQuant(ReduceAnno40)
mouse	mouse_brain_rep2	12M	ReduceAnno40	IsoQuant	Pearson	0.989786	IsoQuant(ReduceAnno40)
mouse	mouse_brain_rep2	12M	ReduceAnno40	IsoQuant	Spearman	0.986201	IsoQuant(ReduceAnno40)
mouse	mouse_heart_rep2	6M	ReduceAnno20	IsoQuant	CCC.est	0.990269	IsoQuant(ReduceAnno20)
mouse	mouse_heart_rep2	6M	ReduceAnno20	IsoQuant	NRMSE	0.065084	IsoQuant(ReduceAnno20)
mouse	mouse_heart_rep2	6M	ReduceAnno20	IsoQuant	Pearson	0.990298	IsoQuant(ReduceAnno20)
mouse	mouse_heart_rep2	6M	ReduceAnno20	IsoQuant	Spearman	0.986273	IsoQuant(ReduceAnno20)
mouse	mouse_heart_rep1	3M	FullAnno	Bambu	CCC.est	0.993733	Bambu(FullAnno)
mouse	mouse_heart_rep1	3M	FullAnno	Bambu	NRMSE	0.059973	Bambu(FullAnno)
mouse	mouse_heart_rep1	3M	FullAnno	Bambu	Pearson	0.993768	Bambu(FullAnno)
mouse	mouse_heart_rep1	3M	FullAnno	Bambu	Spearman	0.988426	Bambu(FullAnno)
mouse	mouse_heart_rep1	6M	FullAnno	IsoQuant	CCC.est	0.991321	IsoQuant(FullAnno)
mouse	mouse_heart_rep1	6M	FullAnno	IsoQuant	NRMSE	0.061702	IsoQuant(FullAnno)
mouse	mouse_heart_rep1	6M	FullAnno	IsoQuant	Pearson	0.991445	IsoQuant(FullAnno)
mouse	mouse_heart_rep1	6M	FullAnno	IsoQuant	Spearman	0.986333	IsoQuant(FullAnno)
mouse	mouse_heart_rep1	20M	NoAnno	IsoQuant	CCC.est	0.990991	IsoQuant(NoAnno)
mouse	mouse_heart_rep1	20M	NoAnno	IsoQuant	NRMSE	0.0466197	IsoQuant(NoAnno)
mouse	mouse_heart_rep1	20M	NoAnno	IsoQuant	Pearson	0.991061	IsoQuant(NoAnno)
mouse	mouse_heart_rep1	20M	NoAnno	IsoQuant	Spearman	0.986408	IsoQuant(NoAnno)
human	human_heart_rep1	12M	ReduceAnno20	ISAtools	CCC.est	0.991347	ISAtools(ReduceAnno20)
human	human_heart_rep1	12M	ReduceAnno20	ISAtools	NRMSE	0.0635004	ISAtools(ReduceAnno20)
human	human_heart_rep1	12M	ReduceAnno20	ISAtools	Pearson	0.992156	ISAtools(ReduceAnno20)
human	human_heart_rep1	12M	ReduceAnno20	ISAtools	Spearman	0.980961	ISAtools(ReduceAnno20)
mouse	mouse_heart_rep2	20M	NoAnno	IsoQuant	CCC.est	0.990907	IsoQuant(NoAnno)
mouse	mouse_heart_rep2	20M	NoAnno	IsoQuant	NRMSE	0.0467896	IsoQuant(NoAnno)
mouse	mouse_heart_rep2	20M	NoAnno	IsoQuant	Pearson	0.990978	IsoQuant(NoAnno)
mouse	mouse_heart_rep2	20M	NoAnno	IsoQuant	Spearman	0.986446	IsoQuant(NoAnno)
human	human_heart_rep1	20M	NoAnno	ISAtools	CCC.est	0.991432	ISAtools(NoAnno)
human	human_heart_rep1	20M	NoAnno	ISAtools	NRMSE	0.056603	ISAtools(NoAnno)
human	human_heart_rep1	20M	NoAnno	ISAtools	Pearson	0.992195	ISAtools(NoAnno)
human	human_heart_rep1	20M	NoAnno	ISAtools	Spearman	0.980685	ISAtools(NoAnno)
mouse	mouse_heart_rep1	3M	ReduceAnno20	IsoQuant	CCC.est	0.989904	IsoQuant(ReduceAnno20)
mouse	mouse_heart_rep1	3M	ReduceAnno20	IsoQuant	NRMSE	0.0757147	IsoQuant(ReduceAnno20)
mouse	mouse_heart_rep1	3M	ReduceAnno20	IsoQuant	Pearson	0.989927	IsoQuant(ReduceAnno20)
mouse	mouse_heart_rep1	3M	ReduceAnno20	IsoQuant	Spearman	0.986505	IsoQuant(ReduceAnno20)
human	human_heart_rep2	20M	FullAnno	ISAtools	CCC.est	0.990959	ISAtools(FullAnno)
human	human_heart_rep2	20M	FullAnno	ISAtools	NRMSE	0.0511541	ISAtools(FullAnno)
human	human_heart_rep2	20M	FullAnno	ISAtools	Pearson	0.992215	ISAtools(FullAnno)
human	human_heart_rep2	20M	FullAnno	ISAtools	Spearman	0.976174	ISAtools(FullAnno)
human	human_brain_rep1	20M	NoAnno	IsoQuant	CCC.est	0.991285	IsoQuant(NoAnno)
human	human_brain_rep1	20M	NoAnno	IsoQuant	NRMSE	0.054959	IsoQuant(NoAnno)
human	human_brain_rep1	20M	NoAnno	IsoQuant	Pearson	0.991318	IsoQuant(NoAnno)
human	human_brain_rep1	20M	NoAnno	IsoQuant	Spearman	0.986688	IsoQuant(NoAnno)
mouse	mouse_brain_rep1	6M	NoAnno	ISAtools	CCC.est	0.991548	ISAtools(NoAnno)
mouse	mouse_brain_rep1	6M	NoAnno	ISAtools	NRMSE	0.0588839	ISAtools(NoAnno)
mouse	mouse_brain_rep1	6M	NoAnno	ISAtools	Pearson	0.992273	ISAtools(NoAnno)
mouse	mouse_brain_rep1	6M	NoAnno	ISAtools	Spearman	0.984817	ISAtools(NoAnno)
mouse	mouse_heart_rep2	6M	ReduceAnno40	IsoQuant	CCC.est	0.989848	IsoQuant(ReduceAnno40)
mouse	mouse_heart_rep2	6M	ReduceAnno40	IsoQuant	NRMSE	0.0658618	IsoQuant(ReduceAnno40)
mouse	mouse_heart_rep2	6M	ReduceAnno40	IsoQuant	Pearson	0.989869	IsoQuant(ReduceAnno40)
mouse	mouse_heart_rep2	6M	ReduceAnno40	IsoQuant	Spearman	0.986814	IsoQuant(ReduceAnno40)
human	human_brain_rep2	20M	FullAnno	Bambu	CCC.est	0.985451	Bambu(FullAnno)
human	human_brain_rep2	20M	FullAnno	Bambu	NRMSE	0.0611355	Bambu(FullAnno)
human	human_brain_rep2	20M	FullAnno	Bambu	Pearson	0.98564	Bambu(FullAnno)
human	human_brain_rep2	20M	FullAnno	Bambu	Spearman	0.974794	Bambu(FullAnno)
mouse	mouse_brain_rep1	3M	ReduceAnno20	ISAtools	CCC.est	0.991724	ISAtools(ReduceAnno20)
mouse	mouse_brain_rep1	3M	ReduceAnno20	ISAtools	NRMSE	0.0711791	ISAtools(ReduceAnno20)
mouse	mouse_brain_rep1	3M	ReduceAnno20	ISAtools	Pearson	0.992304	ISAtools(ReduceAnno20)
mouse	mouse_brain_rep1	3M	ReduceAnno20	ISAtools	Spearman	0.988351	ISAtools(ReduceAnno20)
human	human_heart_rep2	3M	NoAnno	ISAtools	CCC.est	0.992247	ISAtools(NoAnno)
human	human_heart_rep2	3M	NoAnno	ISAtools	NRMSE	0.0710103	ISAtools(NoAnno)
human	human_heart_rep2	3M	NoAnno	ISAtools	Pearson	0.992443	ISAtools(NoAnno)
human	human_heart_rep2	3M	NoAnno	ISAtools	Spearman	0.986399	ISAtools(NoAnno)
human	human_brain_rep1	6M	ReduceAnno40	Mandalorion	CCC.est	0.984086	Mandalorion(ReduceAnno40)
human	human_brain_rep1	6M	ReduceAnno40	Mandalorion	NRMSE	0.0772899	Mandalorion(ReduceAnno40)
human	human_brain_rep1	6M	ReduceAnno40	Mandalorion	Pearson	0.993001	Mandalorion(ReduceAnno40)
human	human_brain_rep1	6M	ReduceAnno40	Mandalorion	Spearman	0.983805	Mandalorion(ReduceAnno40)
mouse	mouse_brain_rep2	6M	ReduceAnno20	ISAtools	CCC.est	0.991678	ISAtools(ReduceAnno20)
mouse	mouse_brain_rep2	6M	ReduceAnno20	ISAtools	NRMSE	0.0593968	ISAtools(ReduceAnno20)
mouse	mouse_brain_rep2	6M	ReduceAnno20	ISAtools	Pearson	0.992506	ISAtools(ReduceAnno20)
mouse	mouse_brain_rep2	6M	ReduceAnno20	ISAtools	Spearman	0.984768	ISAtools(ReduceAnno20)
human	human_heart_rep1	3M	NoAnno	ISAtools	CCC.est	0.992445	ISAtools(NoAnno)
human	human_heart_rep1	3M	NoAnno	ISAtools	NRMSE	0.0606287	ISAtools(NoAnno)
human	human_heart_rep1	3M	NoAnno	ISAtools	Pearson	0.992614	ISAtools(NoAnno)
human	human_heart_rep1	3M	NoAnno	ISAtools	Spearman	0.988852	ISAtools(NoAnno)
human	human_heart_rep2	12M	ReduceAnno40	Mandalorion	CCC.est	0.986804	Mandalorion(ReduceAnno40)
human	human_heart_rep2	12M	ReduceAnno40	Mandalorion	NRMSE	0.0699467	Mandalorion(ReduceAnno40)
human	human_heart_rep2	12M	ReduceAnno40	Mandalorion	Pearson	0.994159	Mandalorion(ReduceAnno40)
human	human_heart_rep2	12M	ReduceAnno40	Mandalorion	Spearman	0.983846	Mandalorion(ReduceAnno40)
human	human_heart_rep2	3M	ReduceAnno40	IsoQuant	CCC.est	0.989675	IsoQuant(ReduceAnno40)
human	human_heart_rep2	3M	ReduceAnno40	IsoQuant	NRMSE	0.0844114	IsoQuant(ReduceAnno40)
human	human_heart_rep2	3M	ReduceAnno40	IsoQuant	Pearson	0.98969	IsoQuant(ReduceAnno40)
human	human_heart_rep2	3M	ReduceAnno40	IsoQuant	Spearman	0.986993	IsoQuant(ReduceAnno40)
human	human_heart_rep1	6M	FullAnno	Mandalorion	CCC.est	0.98483	Mandalorion(FullAnno)
human	human_heart_rep1	6M	FullAnno	Mandalorion	NRMSE	0.0769019	Mandalorion(FullAnno)
human	human_heart_rep1	6M	FullAnno	Mandalorion	Pearson	0.993113	Mandalorion(FullAnno)
human	human_heart_rep1	6M	FullAnno	Mandalorion	Spearman	0.984107	Mandalorion(FullAnno)
mouse	mouse_heart_rep1	6M	ReduceAnno40	IsoQuant	CCC.est	0.990243	IsoQuant(ReduceAnno40)
mouse	mouse_heart_rep1	6M	ReduceAnno40	IsoQuant	NRMSE	0.0645875	IsoQuant(ReduceAnno40)
mouse	mouse_heart_rep1	6M	ReduceAnno40	IsoQuant	Pearson	0.990264	IsoQuant(ReduceAnno40)
mouse	mouse_heart_rep1	6M	ReduceAnno40	IsoQuant	Spearman	0.98709	IsoQuant(ReduceAnno40)
human	human_heart_rep1	6M	ReduceAnno20	Mandalorion	CCC.est	0.984901	Mandalorion(ReduceAnno20)
human	human_heart_rep1	6M	ReduceAnno20	Mandalorion	NRMSE	0.0766654	Mandalorion(ReduceAnno20)
human	human_heart_rep1	6M	ReduceAnno20	Mandalorion	Pearson	0.993121	Mandalorion(ReduceAnno20)
human	human_heart_rep1	6M	ReduceAnno20	Mandalorion	Spearman	0.984409	Mandalorion(ReduceAnno20)
human	human_brain_rep2	12M	FullAnno	Bambu	CCC.est	0.987991	Bambu(FullAnno)
human	human_brain_rep2	12M	FullAnno	Bambu	NRMSE	0.0620201	Bambu(FullAnno)
human	human_brain_rep2	12M	FullAnno	Bambu	Pearson	0.988143	Bambu(FullAnno)
human	human_brain_rep2	12M	FullAnno	Bambu	Spearman	0.977942	Bambu(FullAnno)
mouse	mouse_heart_rep1	3M	ReduceAnno40	IsoQuant	CCC.est	0.990356	IsoQuant(ReduceAnno40)
mouse	mouse_heart_rep1	3M	ReduceAnno40	IsoQuant	NRMSE	0.0734628	IsoQuant(ReduceAnno40)
mouse	mouse_heart_rep1	3M	ReduceAnno40	IsoQuant	Pearson	0.99037	IsoQuant(ReduceAnno40)
mouse	mouse_heart_rep1	3M	ReduceAnno40	IsoQuant	Spearman	0.987133	IsoQuant(ReduceAnno40)
human	human_heart_rep2	12M	FullAnno	ISAtools	CCC.est	0.991472	ISAtools(FullAnno)
human	human_heart_rep2	12M	FullAnno	ISAtools	NRMSE	0.0561278	ISAtools(FullAnno)
human	human_heart_rep2	12M	FullAnno	ISAtools	Pearson	0.992619	ISAtools(FullAnno)
human	human_heart_rep2	12M	FullAnno	ISAtools	Spearman	0.979087	ISAtools(FullAnno)
human	human_brain_rep2	6M	FullAnno	Mandalorion	CCC.est	0.984785	Mandalorion(FullAnno)
human	human_brain_rep2	6M	FullAnno	Mandalorion	NRMSE	0.0790347	Mandalorion(FullAnno)
human	human_brain_rep2	6M	FullAnno	Mandalorion	Pearson	0.992701	Mandalorion(FullAnno)
human	human_brain_rep2	6M	FullAnno	Mandalorion	Spearman	0.984415	Mandalorion(FullAnno)
mouse	mouse_brain_rep1	6M	ReduceAnno20	IsoQuant	CCC.est	0.990782	IsoQuant(ReduceAnno20)
mouse	mouse_brain_rep1	6M	ReduceAnno20	IsoQuant	NRMSE	0.0615741	IsoQuant(ReduceAnno20)
mouse	mouse_brain_rep1	6M	ReduceAnno20	IsoQuant	Pearson	0.990837	IsoQuant(ReduceAnno20)
mouse	mouse_brain_rep1	6M	ReduceAnno20	IsoQuant	Spearman	0.987168	IsoQuant(ReduceAnno20)
human	human_heart_rep1	3M	NoAnno	Mandalorion	CCC.est	0.983824	Mandalorion(NoAnno)
human	human_heart_rep1	3M	NoAnno	Mandalorion	NRMSE	0.0776652	Mandalorion(NoAnno)
human	human_heart_rep1	3M	NoAnno	Mandalorion	Pearson	0.992105	Mandalorion(NoAnno)
human	human_heart_rep1	3M	NoAnno	Mandalorion	Spearman	0.984467	Mandalorion(NoAnno)
mouse	mouse_brain_rep2	6M	FullAnno	IsoQuant	CCC.est	0.992057	IsoQuant(FullAnno)
mouse	mouse_brain_rep2	6M	FullAnno	IsoQuant	NRMSE	0.0581695	IsoQuant(FullAnno)
mouse	mouse_brain_rep2	6M	FullAnno	IsoQuant	Pearson	0.992182	IsoQuant(FullAnno)
mouse	mouse_brain_rep2	6M	FullAnno	IsoQuant	Spearman	0.987261	IsoQuant(FullAnno)
human	human_brain_rep1	12M	FullAnno	Mandalorion	CCC.est	0.987057	Mandalorion(FullAnno)
human	human_brain_rep1	12M	FullAnno	Mandalorion	NRMSE	0.0746257	Mandalorion(FullAnno)
human	human_brain_rep1	12M	FullAnno	Mandalorion	Pearson	0.99425	Mandalorion(FullAnno)
human	human_brain_rep1	12M	FullAnno	Mandalorion	Spearman	0.984481	Mandalorion(FullAnno)
mouse	mouse_heart_rep2	20M	ReduceAnno40	ISAtools	CCC.est	0.991859	ISAtools(ReduceAnno40)
mouse	mouse_heart_rep2	20M	ReduceAnno40	ISAtools	NRMSE	0.0451256	ISAtools(ReduceAnno40)
mouse	mouse_heart_rep2	20M	ReduceAnno40	ISAtools	Pearson	0.992623	ISAtools(ReduceAnno40)
mouse	mouse_heart_rep2	20M	ReduceAnno40	ISAtools	Spearman	0.981072	ISAtools(ReduceAnno40)
mouse	mouse_brain_rep1	6M	FullAnno	IsoQuant	CCC.est	0.991639	IsoQuant(FullAnno)
mouse	mouse_brain_rep1	6M	FullAnno	IsoQuant	NRMSE	0.0589818	IsoQuant(FullAnno)
mouse	mouse_brain_rep1	6M	FullAnno	IsoQuant	Pearson	0.991782	IsoQuant(FullAnno)
mouse	mouse_brain_rep1	6M	FullAnno	IsoQuant	Spearman	0.987261	IsoQuant(FullAnno)
human	human_heart_rep1	6M	ReduceAnno20	ISAtools	CCC.est	0.992176	ISAtools(ReduceAnno20)
human	human_heart_rep1	6M	ReduceAnno20	ISAtools	NRMSE	0.0736503	ISAtools(ReduceAnno20)
human	human_heart_rep1	6M	ReduceAnno20	ISAtools	Pearson	0.992671	ISAtools(ReduceAnno20)
human	human_heart_rep1	6M	ReduceAnno20	ISAtools	Spearman	0.987276	ISAtools(ReduceAnno20)
human	human_heart_rep1	6M	ReduceAnno40	ISAtools	CCC.est	0.992259	ISAtools(ReduceAnno40)
human	human_heart_rep1	6M	ReduceAnno40	ISAtools	NRMSE	0.0726959	ISAtools(ReduceAnno40)
human	human_heart_rep1	6M	ReduceAnno40	ISAtools	Pearson	0.992679	ISAtools(ReduceAnno40)
human	human_heart_rep1	6M	ReduceAnno40	ISAtools	Spearman	0.987854	ISAtools(ReduceAnno40)
mouse	mouse_heart_rep1	20M	ReduceAnno20	ISAtools	CCC.est	0.991831	ISAtools(ReduceAnno20)
mouse	mouse_heart_rep1	20M	ReduceAnno20	ISAtools	NRMSE	0.0452512	ISAtools(ReduceAnno20)
mouse	mouse_heart_rep1	20M	ReduceAnno20	ISAtools	Pearson	0.99269	ISAtools(ReduceAnno20)
mouse	mouse_heart_rep1	20M	ReduceAnno20	ISAtools	Spearman	0.981187	ISAtools(ReduceAnno20)
mouse	mouse_brain_rep2	20M	NoAnno	ISAtools	CCC.est	0.991954	ISAtools(NoAnno)
mouse	mouse_brain_rep2	20M	NoAnno	ISAtools	NRMSE	0.0447768	ISAtools(NoAnno)
mouse	mouse_brain_rep2	20M	NoAnno	ISAtools	Pearson	0.992742	ISAtools(NoAnno)
mouse	mouse_brain_rep2	20M	NoAnno	ISAtools	Spearman	0.98384	ISAtools(NoAnno)
human	human_heart_rep1	6M	NoAnno	Bambu	CCC.est	0.993205	Bambu(NoAnno)
human	human_heart_rep1	6M	NoAnno	Bambu	NRMSE	0.0632856	Bambu(NoAnno)
human	human_heart_rep1	6M	NoAnno	Bambu	Pearson	0.99321	Bambu(NoAnno)
human	human_heart_rep1	6M	NoAnno	Bambu	Spearman	0.991535	Bambu(NoAnno)
mouse	mouse_heart_rep2	12M	ReduceAnno40	ISAtools	CCC.est	0.992031	ISAtools(ReduceAnno40)
mouse	mouse_heart_rep2	12M	ReduceAnno40	ISAtools	NRMSE	0.0494327	ISAtools(ReduceAnno40)
mouse	mouse_heart_rep2	12M	ReduceAnno40	ISAtools	Pearson	0.99279	ISAtools(ReduceAnno40)
mouse	mouse_heart_rep2	12M	ReduceAnno40	ISAtools	Spearman	0.98202	ISAtools(ReduceAnno40)
mouse	mouse_heart_rep2	3M	ReduceAnno20	IsoQuant	CCC.est	0.991114	IsoQuant(ReduceAnno20)
mouse	mouse_heart_rep2	3M	ReduceAnno20	IsoQuant	NRMSE	0.0711498	IsoQuant(ReduceAnno20)
mouse	mouse_heart_rep2	3M	ReduceAnno20	IsoQuant	Pearson	0.991135	IsoQuant(ReduceAnno20)
mouse	mouse_heart_rep2	3M	ReduceAnno20	IsoQuant	Spearman	0.987282	IsoQuant(ReduceAnno20)
human	human_heart_rep1	20M	FullAnno	ISAtools	CCC.est	0.991846	ISAtools(FullAnno)
human	human_heart_rep1	20M	FullAnno	ISAtools	NRMSE	0.0550331	ISAtools(FullAnno)
human	human_heart_rep1	20M	FullAnno	ISAtools	Pearson	0.992876	ISAtools(FullAnno)
human	human_heart_rep1	20M	FullAnno	ISAtools	Spearman	0.980441	ISAtools(FullAnno)
human	human_brain_rep1	3M	ReduceAnno40	ISAtools	CCC.est	0.992564	ISAtools(ReduceAnno40)
human	human_brain_rep1	3M	ReduceAnno40	ISAtools	NRMSE	0.0789094	ISAtools(ReduceAnno40)
human	human_brain_rep1	3M	ReduceAnno40	ISAtools	Pearson	0.992877	ISAtools(ReduceAnno40)
human	human_brain_rep1	3M	ReduceAnno40	ISAtools	Spearman	0.988626	ISAtools(ReduceAnno40)
mouse	mouse_heart_rep2	6M	FullAnno	IsoQuant	CCC.est	0.992391	IsoQuant(FullAnno)
mouse	mouse_heart_rep2	6M	FullAnno	IsoQuant	NRMSE	0.0578528	IsoQuant(FullAnno)
mouse	mouse_heart_rep2	6M	FullAnno	IsoQuant	Pearson	0.992503	IsoQuant(FullAnno)
mouse	mouse_heart_rep2	6M	FullAnno	IsoQuant	Spearman	0.987333	IsoQuant(FullAnno)
human	human_brain_rep1	3M	ReduceAnno20	ISAtools	CCC.est	0.992557	ISAtools(ReduceAnno20)
human	human_brain_rep1	3M	ReduceAnno20	ISAtools	NRMSE	0.0818985	ISAtools(ReduceAnno20)
human	human_brain_rep1	3M	ReduceAnno20	ISAtools	Pearson	0.992911	ISAtools(ReduceAnno20)
human	human_brain_rep1	3M	ReduceAnno20	ISAtools	Spearman	0.987887	ISAtools(ReduceAnno20)
human	human_brain_rep1	20M	NoAnno	Mandalorion	CCC.est	0.987891	Mandalorion(NoAnno)
human	human_brain_rep1	20M	NoAnno	Mandalorion	NRMSE	0.0657899	Mandalorion(NoAnno)
human	human_brain_rep1	20M	NoAnno	Mandalorion	Pearson	0.994645	Mandalorion(NoAnno)
human	human_brain_rep1	20M	NoAnno	Mandalorion	Spearman	0.984537	Mandalorion(NoAnno)
human	human_brain_rep2	6M	ReduceAnno20	Mandalorion	CCC.est	0.984861	Mandalorion(ReduceAnno20)
human	human_brain_rep2	6M	ReduceAnno20	Mandalorion	NRMSE	0.0787242	Mandalorion(ReduceAnno20)
human	human_brain_rep2	6M	ReduceAnno20	Mandalorion	Pearson	0.99274	Mandalorion(ReduceAnno20)
human	human_brain_rep2	6M	ReduceAnno20	Mandalorion	Spearman	0.98463	Mandalorion(ReduceAnno20)
human	human_brain_rep2	6M	NoAnno	Bambu	CCC.est	0.990353	Bambu(NoAnno)
human	human_brain_rep2	6M	NoAnno	Bambu	NRMSE	0.0640144	Bambu(NoAnno)
human	human_brain_rep2	6M	NoAnno	Bambu	Pearson	0.990371	Bambu(NoAnno)
human	human_brain_rep2	6M	NoAnno	Bambu	Spearman	0.986803	Bambu(NoAnno)
human	human_heart_rep1	6M	ReduceAnno40	Mandalorion	CCC.est	0.985047	Mandalorion(ReduceAnno40)
human	human_heart_rep1	6M	ReduceAnno40	Mandalorion	NRMSE	0.0762962	Mandalorion(ReduceAnno40)
human	human_heart_rep1	6M	ReduceAnno40	Mandalorion	Pearson	0.993156	Mandalorion(ReduceAnno40)
human	human_heart_rep1	6M	ReduceAnno40	Mandalorion	Spearman	0.984636	Mandalorion(ReduceAnno40)
human	human_heart_rep2	12M	NoAnno	IsoQuant	CCC.est	0.991295	IsoQuant(NoAnno)
human	human_heart_rep2	12M	NoAnno	IsoQuant	NRMSE	0.0557432	IsoQuant(NoAnno)
human	human_heart_rep2	12M	NoAnno	IsoQuant	Pearson	0.991335	IsoQuant(NoAnno)
human	human_heart_rep2	12M	NoAnno	IsoQuant	Spearman	0.987684	IsoQuant(NoAnno)
human	human_brain_rep1	6M	FullAnno	ISAtools	CCC.est	0.992056	ISAtools(FullAnno)
human	human_brain_rep1	6M	FullAnno	ISAtools	NRMSE	0.0745307	ISAtools(FullAnno)
human	human_brain_rep1	6M	FullAnno	ISAtools	Pearson	0.992915	ISAtools(FullAnno)
human	human_brain_rep1	6M	FullAnno	ISAtools	Spearman	0.985552	ISAtools(FullAnno)
human	human_heart_rep2	20M	FullAnno	Bambu	CCC.est	0.985773	Bambu(FullAnno)
human	human_heart_rep2	20M	FullAnno	Bambu	NRMSE	0.064249	Bambu(FullAnno)
human	human_heart_rep2	20M	FullAnno	Bambu	Pearson	0.985927	Bambu(FullAnno)
human	human_heart_rep2	20M	FullAnno	Bambu	Spearman	0.976999	Bambu(FullAnno)
mouse	mouse_brain_rep2	6M	ReduceAnno20	IsoQuant	CCC.est	0.991499	IsoQuant(ReduceAnno20)
mouse	mouse_brain_rep2	6M	ReduceAnno20	IsoQuant	NRMSE	0.0598277	IsoQuant(ReduceAnno20)
mouse	mouse_brain_rep2	6M	ReduceAnno20	IsoQuant	Pearson	0.991546	IsoQuant(ReduceAnno20)
mouse	mouse_brain_rep2	6M	ReduceAnno20	IsoQuant	Spearman	0.987834	IsoQuant(ReduceAnno20)
human	human_heart_rep1	6M	ReduceAnno20	IsoQuant	CCC.est	0.989571	IsoQuant(ReduceAnno20)
human	human_heart_rep1	6M	ReduceAnno20	IsoQuant	NRMSE	0.085472	IsoQuant(ReduceAnno20)
human	human_heart_rep1	6M	ReduceAnno20	IsoQuant	Pearson	0.989595	IsoQuant(ReduceAnno20)
human	human_heart_rep1	6M	ReduceAnno20	IsoQuant	Spearman	0.987862	IsoQuant(ReduceAnno20)
mouse	mouse_brain_rep2	20M	NoAnno	IsoQuant	CCC.est	0.991157	IsoQuant(NoAnno)
mouse	mouse_brain_rep2	20M	NoAnno	IsoQuant	NRMSE	0.0458971	IsoQuant(NoAnno)
mouse	mouse_brain_rep2	20M	NoAnno	IsoQuant	Pearson	0.991225	IsoQuant(NoAnno)
mouse	mouse_brain_rep2	20M	NoAnno	IsoQuant	Spearman	0.987864	IsoQuant(NoAnno)
human	human_brain_rep1	20M	FullAnno	Bambu	CCC.est	0.988201	Bambu(FullAnno)
human	human_brain_rep1	20M	FullAnno	Bambu	NRMSE	0.0646055	Bambu(FullAnno)
human	human_brain_rep1	20M	FullAnno	Bambu	Pearson	0.988343	Bambu(FullAnno)
human	human_brain_rep1	20M	FullAnno	Bambu	Spearman	0.979346	Bambu(FullAnno)
mouse	mouse_brain_rep1	3M	ReduceAnno40	ISAtools	CCC.est	0.992561	ISAtools(ReduceAnno40)
mouse	mouse_brain_rep1	3M	ReduceAnno40	ISAtools	NRMSE	0.0668518	ISAtools(ReduceAnno40)
mouse	mouse_brain_rep1	3M	ReduceAnno40	ISAtools	Pearson	0.993024	ISAtools(ReduceAnno40)
mouse	mouse_brain_rep1	3M	ReduceAnno40	ISAtools	Spearman	0.989737	ISAtools(ReduceAnno40)
human	human_brain_rep2	6M	FullAnno	Bambu	CCC.est	0.990843	Bambu(FullAnno)
human	human_brain_rep2	6M	FullAnno	Bambu	NRMSE	0.0646279	Bambu(FullAnno)
human	human_brain_rep2	6M	FullAnno	Bambu	Pearson	0.990946	Bambu(FullAnno)
human	human_brain_rep2	6M	FullAnno	Bambu	Spearman	0.982134	Bambu(FullAnno)
human	human_brain_rep1	12M	ReduceAnno20	Mandalorion	CCC.est	0.987165	Mandalorion(ReduceAnno20)
human	human_brain_rep1	12M	ReduceAnno20	Mandalorion	NRMSE	0.0742777	Mandalorion(ReduceAnno20)
human	human_brain_rep1	12M	ReduceAnno20	Mandalorion	Pearson	0.994293	Mandalorion(ReduceAnno20)
human	human_brain_rep1	12M	ReduceAnno20	Mandalorion	Spearman	0.98478	Mandalorion(ReduceAnno20)
human	human_heart_rep2	3M	FullAnno	IsoQuant	CCC.est	0.99144	IsoQuant(FullAnno)
human	human_heart_rep2	3M	FullAnno	IsoQuant	NRMSE	0.0775259	IsoQuant(FullAnno)
human	human_heart_rep2	3M	FullAnno	IsoQuant	Pearson	0.991515	IsoQuant(FullAnno)
human	human_heart_rep2	3M	FullAnno	IsoQuant	Spearman	0.987878	IsoQuant(FullAnno)
human	human_heart_rep2	6M	FullAnno	Mandalorion	CCC.est	0.986809	Mandalorion(FullAnno)
human	human_heart_rep2	6M	FullAnno	Mandalorion	NRMSE	0.0767449	Mandalorion(FullAnno)
human	human_heart_rep2	6M	FullAnno	Mandalorion	Pearson	0.993648	Mandalorion(FullAnno)
human	human_heart_rep2	6M	FullAnno	Mandalorion	Spearman	0.984822	Mandalorion(FullAnno)
mouse	mouse_heart_rep2	3M	ReduceAnno40	IsoQuant	CCC.est	0.991056	IsoQuant(ReduceAnno40)
mouse	mouse_heart_rep2	3M	ReduceAnno40	IsoQuant	NRMSE	0.0707422	IsoQuant(ReduceAnno40)
mouse	mouse_heart_rep2	3M	ReduceAnno40	IsoQuant	Pearson	0.99107	IsoQuant(ReduceAnno40)
mouse	mouse_heart_rep2	3M	ReduceAnno40	IsoQuant	Spearman	0.987946	IsoQuant(ReduceAnno40)
mouse	mouse_brain_rep1	20M	ReduceAnno40	Bambu	CCC.est	0.982567	Bambu(ReduceAnno40)
mouse	mouse_brain_rep1	20M	ReduceAnno40	Bambu	NRMSE	0.0652337	Bambu(ReduceAnno40)
mouse	mouse_brain_rep1	20M	ReduceAnno40	Bambu	Pearson	0.982812	Bambu(ReduceAnno40)
mouse	mouse_brain_rep1	20M	ReduceAnno40	Bambu	Spearman	0.977919	Bambu(ReduceAnno40)
mouse	mouse_brain_rep1	20M	NoAnno	IsoQuant	CCC.est	0.991386	IsoQuant(NoAnno)
mouse	mouse_brain_rep1	20M	NoAnno	IsoQuant	NRMSE	0.0453885	IsoQuant(NoAnno)
mouse	mouse_brain_rep1	20M	NoAnno	IsoQuant	Pearson	0.991462	IsoQuant(NoAnno)
mouse	mouse_brain_rep1	20M	NoAnno	IsoQuant	Spearman	0.988333	IsoQuant(NoAnno)
human	human_brain_rep2	3M	ReduceAnno20	IsoQuant	CCC.est	0.991138	IsoQuant(ReduceAnno20)
human	human_brain_rep2	3M	ReduceAnno20	IsoQuant	NRMSE	0.0760031	IsoQuant(ReduceAnno20)
human	human_brain_rep2	3M	ReduceAnno20	IsoQuant	Pearson	0.991166	IsoQuant(ReduceAnno20)
human	human_brain_rep2	3M	ReduceAnno20	IsoQuant	Spearman	0.988397	IsoQuant(ReduceAnno20)
mouse	mouse_brain_rep2	6M	ReduceAnno40	ISAtools	CCC.est	0.992287	ISAtools(ReduceAnno40)
mouse	mouse_brain_rep2	6M	ReduceAnno40	ISAtools	NRMSE	0.0570097	ISAtools(ReduceAnno40)
mouse	mouse_brain_rep2	6M	ReduceAnno40	ISAtools	Pearson	0.993048	ISAtools(ReduceAnno40)
mouse	mouse_brain_rep2	6M	ReduceAnno40	ISAtools	Spearman	0.985739	ISAtools(ReduceAnno40)
mouse	mouse_heart_rep2	6M	ReduceAnno20	ISAtools	CCC.est	0.992312	ISAtools(ReduceAnno20)
mouse	mouse_heart_rep2	6M	ReduceAnno20	ISAtools	NRMSE	0.057966	ISAtools(ReduceAnno20)
mouse	mouse_heart_rep2	6M	ReduceAnno20	ISAtools	Pearson	0.993057	ISAtools(ReduceAnno20)
mouse	mouse_heart_rep2	6M	ReduceAnno20	ISAtools	Spearman	0.984457	ISAtools(ReduceAnno20)
mouse	mouse_brain_rep2	6M	FullAnno	ISAtools	CCC.est	0.992064	ISAtools(FullAnno)
mouse	mouse_brain_rep2	6M	FullAnno	ISAtools	NRMSE	0.0581629	ISAtools(FullAnno)
mouse	mouse_brain_rep2	6M	FullAnno	ISAtools	Pearson	0.993068	ISAtools(FullAnno)
mouse	mouse_brain_rep2	6M	FullAnno	ISAtools	Spearman	0.985151	ISAtools(FullAnno)
human	human_brain_rep1	6M	NoAnno	Mandalorion	CCC.est	0.984764	Mandalorion(NoAnno)
human	human_brain_rep1	6M	NoAnno	Mandalorion	NRMSE	0.0755248	Mandalorion(NoAnno)
human	human_brain_rep1	6M	NoAnno	Mandalorion	Pearson	0.993286	Mandalorion(NoAnno)
human	human_brain_rep1	6M	NoAnno	Mandalorion	Spearman	0.984877	Mandalorion(NoAnno)
mouse	mouse_heart_rep2	12M	ReduceAnno20	ISAtools	CCC.est	0.992266	ISAtools(ReduceAnno20)
mouse	mouse_heart_rep2	12M	ReduceAnno20	ISAtools	NRMSE	0.0488161	ISAtools(ReduceAnno20)
mouse	mouse_heart_rep2	12M	ReduceAnno20	ISAtools	Pearson	0.993075	ISAtools(ReduceAnno20)
mouse	mouse_heart_rep2	12M	ReduceAnno20	ISAtools	Spearman	0.981844	ISAtools(ReduceAnno20)
mouse	mouse_brain_rep1	6M	ReduceAnno40	IsoQuant	CCC.est	0.991325	IsoQuant(ReduceAnno40)
mouse	mouse_brain_rep1	6M	ReduceAnno40	IsoQuant	NRMSE	0.0594768	IsoQuant(ReduceAnno40)
mouse	mouse_brain_rep1	6M	ReduceAnno40	IsoQuant	Pearson	0.991371	IsoQuant(ReduceAnno40)
mouse	mouse_brain_rep1	6M	ReduceAnno40	IsoQuant	Spearman	0.988498	IsoQuant(ReduceAnno40)
human	human_heart_rep1	20M	NoAnno	IsoQuant	CCC.est	0.991147	IsoQuant(NoAnno)
human	human_heart_rep1	20M	NoAnno	IsoQuant	NRMSE	0.0561704	IsoQuant(NoAnno)
human	human_heart_rep1	20M	NoAnno	IsoQuant	Pearson	0.99118	IsoQuant(NoAnno)
human	human_heart_rep1	20M	NoAnno	IsoQuant	Spearman	0.988529	IsoQuant(NoAnno)
human	human_heart_rep2	12M	NoAnno	Mandalorion	CCC.est	0.987484	Mandalorion(NoAnno)
human	human_heart_rep2	12M	NoAnno	Mandalorion	NRMSE	0.0680553	Mandalorion(NoAnno)
human	human_heart_rep2	12M	NoAnno	Mandalorion	Pearson	0.994468	Mandalorion(NoAnno)
human	human_heart_rep2	12M	NoAnno	Mandalorion	Spearman	0.984906	Mandalorion(NoAnno)
human	human_brain_rep2	6M	ReduceAnno40	Mandalorion	CCC.est	0.985072	Mandalorion(ReduceAnno40)
human	human_brain_rep2	6M	ReduceAnno40	Mandalorion	NRMSE	0.0781657	Mandalorion(ReduceAnno40)
human	human_brain_rep2	6M	ReduceAnno40	Mandalorion	Pearson	0.992809	Mandalorion(ReduceAnno40)
human	human_brain_rep2	6M	ReduceAnno40	Mandalorion	Spearman	0.984928	Mandalorion(ReduceAnno40)
human	human_brain_rep1	6M	ReduceAnno20	IsoQuant	CCC.est	0.990941	IsoQuant(ReduceAnno20)
human	human_brain_rep1	6M	ReduceAnno20	IsoQuant	NRMSE	0.0796908	IsoQuant(ReduceAnno20)
human	human_brain_rep1	6M	ReduceAnno20	IsoQuant	Pearson	0.990967	IsoQuant(ReduceAnno20)
human	human_brain_rep1	6M	ReduceAnno20	IsoQuant	Spearman	0.98853	IsoQuant(ReduceAnno20)
mouse	mouse_heart_rep2	20M	FullAnno	Mandalorion	CCC.est	0.990702	Mandalorion(FullAnno)
mouse	mouse_heart_rep2	20M	FullAnno	Mandalorion	NRMSE	0.0487085	Mandalorion(FullAnno)
mouse	mouse_heart_rep2	20M	FullAnno	Mandalorion	Pearson	0.995476	Mandalorion(FullAnno)
mouse	mouse_heart_rep2	20M	FullAnno	Mandalorion	Spearman	0.984957	Mandalorion(FullAnno)
human	human_heart_rep1	6M	FullAnno	IsoQuant	CCC.est	0.991464	IsoQuant(FullAnno)
human	human_heart_rep1	6M	FullAnno	IsoQuant	NRMSE	0.0778997	IsoQuant(FullAnno)
human	human_heart_rep1	6M	FullAnno	IsoQuant	Pearson	0.991542	IsoQuant(FullAnno)
human	human_heart_rep1	6M	FullAnno	IsoQuant	Spearman	0.988637	IsoQuant(FullAnno)
human	human_heart_rep1	12M	FullAnno	ISAtools	CCC.est	0.992121	ISAtools(FullAnno)
human	human_heart_rep1	12M	FullAnno	ISAtools	NRMSE	0.0605607	ISAtools(FullAnno)
human	human_heart_rep1	12M	FullAnno	ISAtools	Pearson	0.993094	ISAtools(FullAnno)
human	human_heart_rep1	12M	FullAnno	ISAtools	Spearman	0.981969	ISAtools(FullAnno)
mouse	mouse_heart_rep2	3M	FullAnno	IsoQuant	CCC.est	0.993687	IsoQuant(FullAnno)
mouse	mouse_heart_rep2	3M	FullAnno	IsoQuant	NRMSE	0.0602644	IsoQuant(FullAnno)
mouse	mouse_heart_rep2	3M	FullAnno	IsoQuant	Pearson	0.993773	IsoQuant(FullAnno)
mouse	mouse_heart_rep2	3M	FullAnno	IsoQuant	Spearman	0.988654	IsoQuant(FullAnno)
mouse	mouse_heart_rep1	12M	NoAnno	IsoQuant	CCC.est	0.991921	IsoQuant(NoAnno)
mouse	mouse_heart_rep1	12M	NoAnno	IsoQuant	NRMSE	0.0486924	IsoQuant(NoAnno)
mouse	mouse_heart_rep1	12M	NoAnno	IsoQuant	Pearson	0.991978	IsoQuant(NoAnno)
mouse	mouse_heart_rep1	12M	NoAnno	IsoQuant	Spearman	0.988837	IsoQuant(NoAnno)
human	human_brain_rep1	12M	ReduceAnno40	Mandalorion	CCC.est	0.987314	Mandalorion(ReduceAnno40)
human	human_brain_rep1	12M	ReduceAnno40	Mandalorion	NRMSE	0.0738357	Mandalorion(ReduceAnno40)
human	human_brain_rep1	12M	ReduceAnno40	Mandalorion	Pearson	0.994342	Mandalorion(ReduceAnno40)
human	human_brain_rep1	12M	ReduceAnno40	Mandalorion	Spearman	0.985024	Mandalorion(ReduceAnno40)
mouse	mouse_heart_rep2	12M	FullAnno	Mandalorion	CCC.est	0.989349	Mandalorion(FullAnno)
mouse	mouse_heart_rep2	12M	FullAnno	Mandalorion	NRMSE	0.0578289	Mandalorion(FullAnno)
mouse	mouse_heart_rep2	12M	FullAnno	Mandalorion	Pearson	0.995245	Mandalorion(FullAnno)
mouse	mouse_heart_rep2	12M	FullAnno	Mandalorion	Spearman	0.985032	Mandalorion(FullAnno)
human	human_heart_rep2	6M	ReduceAnno20	Mandalorion	CCC.est	0.986832	Mandalorion(ReduceAnno20)
human	human_heart_rep2	6M	ReduceAnno20	Mandalorion	NRMSE	0.0765885	Mandalorion(ReduceAnno20)
human	human_heart_rep2	6M	ReduceAnno20	Mandalorion	Pearson	0.993614	Mandalorion(ReduceAnno20)
human	human_heart_rep2	6M	ReduceAnno20	Mandalorion	Spearman	0.985034	Mandalorion(ReduceAnno20)
mouse	mouse_heart_rep2	20M	ReduceAnno20	Mandalorion	CCC.est	0.990703	Mandalorion(ReduceAnno20)
mouse	mouse_heart_rep2	20M	ReduceAnno20	Mandalorion	NRMSE	0.0486783	Mandalorion(ReduceAnno20)
mouse	mouse_heart_rep2	20M	ReduceAnno20	Mandalorion	Pearson	0.995428	Mandalorion(ReduceAnno20)
mouse	mouse_heart_rep2	20M	ReduceAnno20	Mandalorion	Spearman	0.985098	Mandalorion(ReduceAnno20)
human	human_heart_rep1	6M	ReduceAnno40	IsoQuant	CCC.est	0.990088	IsoQuant(ReduceAnno40)
human	human_heart_rep1	6M	ReduceAnno40	IsoQuant	NRMSE	0.0826441	IsoQuant(ReduceAnno40)
human	human_heart_rep1	6M	ReduceAnno40	IsoQuant	Pearson	0.990102	IsoQuant(ReduceAnno40)
human	human_heart_rep1	6M	ReduceAnno40	IsoQuant	Spearman	0.9889	IsoQuant(ReduceAnno40)
human	human_brain_rep1	12M	NoAnno	IsoQuant	CCC.est	0.992033	IsoQuant(NoAnno)
human	human_brain_rep1	12M	NoAnno	IsoQuant	NRMSE	0.0587357	IsoQuant(NoAnno)
human	human_brain_rep1	12M	NoAnno	IsoQuant	Pearson	0.992051	IsoQuant(NoAnno)
human	human_brain_rep1	12M	NoAnno	IsoQuant	Spearman	0.988955	IsoQuant(NoAnno)
mouse	mouse_heart_rep1	12M	FullAnno	Mandalorion	CCC.est	0.989221	Mandalorion(FullAnno)
mouse	mouse_heart_rep1	12M	FullAnno	Mandalorion	NRMSE	0.0581644	Mandalorion(FullAnno)
mouse	mouse_heart_rep1	12M	FullAnno	Mandalorion	Pearson	0.995101	Mandalorion(FullAnno)
mouse	mouse_heart_rep1	12M	FullAnno	Mandalorion	Spearman	0.985135	Mandalorion(FullAnno)
human	human_brain_rep2	3M	FullAnno	IsoQuant	CCC.est	0.992513	IsoQuant(FullAnno)
human	human_brain_rep2	3M	FullAnno	IsoQuant	NRMSE	0.0701642	IsoQuant(FullAnno)
human	human_brain_rep2	3M	FullAnno	IsoQuant	Pearson	0.992599	IsoQuant(FullAnno)
human	human_brain_rep2	3M	FullAnno	IsoQuant	Spearman	0.988958	IsoQuant(FullAnno)
mouse	mouse_heart_rep2	12M	ReduceAnno20	Mandalorion	CCC.est	0.989349	Mandalorion(ReduceAnno20)
mouse	mouse_heart_rep2	12M	ReduceAnno20	Mandalorion	NRMSE	0.0577792	Mandalorion(ReduceAnno20)
mouse	mouse_heart_rep2	12M	ReduceAnno20	Mandalorion	Pearson	0.995175	Mandalorion(ReduceAnno20)
mouse	mouse_heart_rep2	12M	ReduceAnno20	Mandalorion	Spearman	0.985163	Mandalorion(ReduceAnno20)
mouse	mouse_heart_rep1	20M	FullAnno	Mandalorion	CCC.est	0.990613	Mandalorion(FullAnno)
mouse	mouse_heart_rep1	20M	FullAnno	Mandalorion	NRMSE	0.048951	Mandalorion(FullAnno)
mouse	mouse_heart_rep1	20M	FullAnno	Mandalorion	Pearson	0.995399	Mandalorion(FullAnno)
mouse	mouse_heart_rep1	20M	FullAnno	Mandalorion	Spearman	0.985233	Mandalorion(FullAnno)
mouse	mouse_heart_rep2	6M	ReduceAnno40	ISAtools	CCC.est	0.992421	ISAtools(ReduceAnno40)
mouse	mouse_heart_rep2	6M	ReduceAnno40	ISAtools	NRMSE	0.0573261	ISAtools(ReduceAnno40)
mouse	mouse_heart_rep2	6M	ReduceAnno40	ISAtools	Pearson	0.993096	ISAtools(ReduceAnno40)
mouse	mouse_heart_rep2	6M	ReduceAnno40	ISAtools	Spearman	0.984891	ISAtools(ReduceAnno40)
mouse	mouse_heart_rep2	12M	NoAnno	IsoQuant	CCC.est	0.992261	IsoQuant(NoAnno)
mouse	mouse_heart_rep2	12M	NoAnno	IsoQuant	NRMSE	0.0477255	IsoQuant(NoAnno)
mouse	mouse_heart_rep2	12M	NoAnno	IsoQuant	Pearson	0.992316	IsoQuant(NoAnno)
mouse	mouse_heart_rep2	12M	NoAnno	IsoQuant	Spearman	0.988987	IsoQuant(NoAnno)
human	human_heart_rep2	6M	ReduceAnno40	Mandalorion	CCC.est	0.987	Mandalorion(ReduceAnno40)
human	human_heart_rep2	6M	ReduceAnno40	Mandalorion	NRMSE	0.0760755	Mandalorion(ReduceAnno40)
human	human_heart_rep2	6M	ReduceAnno40	Mandalorion	Pearson	0.993679	Mandalorion(ReduceAnno40)
human	human_heart_rep2	6M	ReduceAnno40	Mandalorion	Spearman	0.985294	Mandalorion(ReduceAnno40)
human	human_brain_rep1	6M	NoAnno	ISAtools	CCC.est	0.992842	ISAtools(NoAnno)
human	human_brain_rep1	6M	NoAnno	ISAtools	NRMSE	0.0685599	ISAtools(NoAnno)
human	human_brain_rep1	6M	NoAnno	ISAtools	Pearson	0.993126	ISAtools(NoAnno)
human	human_brain_rep1	6M	NoAnno	ISAtools	Spearman	0.989346	ISAtools(NoAnno)
human	human_brain_rep1	12M	FullAnno	Bambu	CCC.est	0.989947	Bambu(FullAnno)
human	human_brain_rep1	12M	FullAnno	Bambu	NRMSE	0.0669667	Bambu(FullAnno)
human	human_brain_rep1	12M	FullAnno	Bambu	Pearson	0.990053	Bambu(FullAnno)
human	human_brain_rep1	12M	FullAnno	Bambu	Spearman	0.981537	Bambu(FullAnno)
mouse	mouse_heart_rep2	20M	ReduceAnno20	ISAtools	CCC.est	0.992418	ISAtools(ReduceAnno20)
mouse	mouse_heart_rep2	20M	ReduceAnno20	ISAtools	NRMSE	0.043632	ISAtools(ReduceAnno20)
mouse	mouse_heart_rep2	20M	ReduceAnno20	ISAtools	Pearson	0.993232	ISAtools(ReduceAnno20)
mouse	mouse_heart_rep2	20M	ReduceAnno20	ISAtools	Spearman	0.98099	ISAtools(ReduceAnno20)
mouse	mouse_heart_rep2	20M	ReduceAnno40	Mandalorion	CCC.est	0.990909	Mandalorion(ReduceAnno40)
mouse	mouse_heart_rep2	20M	ReduceAnno40	Mandalorion	NRMSE	0.0480936	Mandalorion(ReduceAnno40)
mouse	mouse_heart_rep2	20M	ReduceAnno40	Mandalorion	Pearson	0.995511	Mandalorion(ReduceAnno40)
mouse	mouse_heart_rep2	20M	ReduceAnno40	Mandalorion	Spearman	0.985475	Mandalorion(ReduceAnno40)
mouse	mouse_heart_rep1	12M	ReduceAnno20	Mandalorion	CCC.est	0.989374	Mandalorion(ReduceAnno20)
mouse	mouse_heart_rep1	12M	ReduceAnno20	Mandalorion	NRMSE	0.0576647	Mandalorion(ReduceAnno20)
mouse	mouse_heart_rep1	12M	ReduceAnno20	Mandalorion	Pearson	0.995158	Mandalorion(ReduceAnno20)
mouse	mouse_heart_rep1	12M	ReduceAnno20	Mandalorion	Spearman	0.985496	Mandalorion(ReduceAnno20)
mouse	mouse_heart_rep1	3M	FullAnno	IsoQuant	CCC.est	0.993738	IsoQuant(FullAnno)
mouse	mouse_heart_rep1	3M	FullAnno	IsoQuant	NRMSE	0.0599685	IsoQuant(FullAnno)
mouse	mouse_heart_rep1	3M	FullAnno	IsoQuant	Pearson	0.993828	IsoQuant(FullAnno)
mouse	mouse_heart_rep1	3M	FullAnno	IsoQuant	Spearman	0.989121	IsoQuant(FullAnno)
mouse	mouse_heart_rep1	20M	ReduceAnno20	Mandalorion	CCC.est	0.99074	Mandalorion(ReduceAnno20)
mouse	mouse_heart_rep1	20M	ReduceAnno20	Mandalorion	NRMSE	0.0485605	Mandalorion(ReduceAnno20)
mouse	mouse_heart_rep1	20M	ReduceAnno20	Mandalorion	Pearson	0.995453	Mandalorion(ReduceAnno20)
mouse	mouse_heart_rep1	20M	ReduceAnno20	Mandalorion	Spearman	0.985548	Mandalorion(ReduceAnno20)
human	human_brain_rep2	3M	ReduceAnno40	IsoQuant	CCC.est	0.991091	IsoQuant(ReduceAnno40)
human	human_brain_rep2	3M	ReduceAnno40	IsoQuant	NRMSE	0.0757436	IsoQuant(ReduceAnno40)
human	human_brain_rep2	3M	ReduceAnno40	IsoQuant	Pearson	0.991106	IsoQuant(ReduceAnno40)
human	human_brain_rep2	3M	ReduceAnno40	IsoQuant	Spearman	0.989222	IsoQuant(ReduceAnno40)
human	human_heart_rep1	6M	NoAnno	ISAtools	CCC.est	0.993057	ISAtools(NoAnno)
human	human_heart_rep1	6M	NoAnno	ISAtools	NRMSE	0.0669805	ISAtools(NoAnno)
human	human_heart_rep1	6M	NoAnno	ISAtools	Pearson	0.993306	ISAtools(NoAnno)
human	human_heart_rep1	6M	NoAnno	ISAtools	Spearman	0.990073	ISAtools(NoAnno)
mouse	mouse_heart_rep2	12M	ReduceAnno40	Mandalorion	CCC.est	0.989656	Mandalorion(ReduceAnno40)
mouse	mouse_heart_rep2	12M	ReduceAnno40	Mandalorion	NRMSE	0.0568749	Mandalorion(ReduceAnno40)
mouse	mouse_heart_rep2	12M	ReduceAnno40	Mandalorion	Pearson	0.995343	Mandalorion(ReduceAnno40)
mouse	mouse_heart_rep2	12M	ReduceAnno40	Mandalorion	Spearman	0.985616	Mandalorion(ReduceAnno40)
human	human_heart_rep1	6M	NoAnno	Mandalorion	CCC.est	0.985885	Mandalorion(NoAnno)
human	human_heart_rep1	6M	NoAnno	Mandalorion	NRMSE	0.0739941	Mandalorion(NoAnno)
human	human_heart_rep1	6M	NoAnno	Mandalorion	Pearson	0.993536	Mandalorion(NoAnno)
human	human_heart_rep1	6M	NoAnno	Mandalorion	Spearman	0.98579	Mandalorion(NoAnno)
human	human_heart_rep2	12M	FullAnno	Bambu	CCC.est	0.987722	Bambu(FullAnno)
human	human_heart_rep2	12M	FullAnno	Bambu	NRMSE	0.0674506	Bambu(FullAnno)
human	human_heart_rep2	12M	FullAnno	Bambu	Pearson	0.987835	Bambu(FullAnno)
human	human_heart_rep2	12M	FullAnno	Bambu	Spearman	0.97966	Bambu(FullAnno)
human	human_brain_rep1	6M	NoAnno	Bambu	CCC.est	0.992294	Bambu(NoAnno)
human	human_brain_rep1	6M	NoAnno	Bambu	NRMSE	0.0675114	Bambu(NoAnno)
human	human_brain_rep1	6M	NoAnno	Bambu	Pearson	0.992302	Bambu(NoAnno)
human	human_brain_rep1	6M	NoAnno	Bambu	Spearman	0.990523	Bambu(NoAnno)
human	human_heart_rep2	3M	NoAnno	Bambu	CCC.est	0.992539	Bambu(NoAnno)
human	human_heart_rep2	3M	NoAnno	Bambu	NRMSE	0.067632	Bambu(NoAnno)
human	human_heart_rep2	3M	NoAnno	Bambu	Pearson	0.99254	Bambu(NoAnno)
human	human_heart_rep2	3M	NoAnno	Bambu	Spearman	0.990274	Bambu(NoAnno)
human	human_brain_rep2	6M	NoAnno	IsoQuant	CCC.est	0.992179	IsoQuant(NoAnno)
human	human_brain_rep2	6M	NoAnno	IsoQuant	NRMSE	0.0585866	IsoQuant(NoAnno)
human	human_brain_rep2	6M	NoAnno	IsoQuant	Pearson	0.992203	IsoQuant(NoAnno)
human	human_brain_rep2	6M	NoAnno	IsoQuant	Spearman	0.989365	IsoQuant(NoAnno)
human	human_brain_rep1	6M	ReduceAnno40	IsoQuant	CCC.est	0.991543	IsoQuant(ReduceAnno40)
human	human_brain_rep1	6M	ReduceAnno40	IsoQuant	NRMSE	0.0764397	IsoQuant(ReduceAnno40)
human	human_brain_rep1	6M	ReduceAnno40	IsoQuant	Pearson	0.991556	IsoQuant(ReduceAnno40)
human	human_brain_rep1	6M	ReduceAnno40	IsoQuant	Spearman	0.989434	IsoQuant(ReduceAnno40)
human	human_heart_rep1	3M	ReduceAnno20	IsoQuant	CCC.est	0.990655	IsoQuant(ReduceAnno20)
human	human_heart_rep1	3M	ReduceAnno20	IsoQuant	NRMSE	0.0952078	IsoQuant(ReduceAnno20)
human	human_heart_rep1	3M	ReduceAnno20	IsoQuant	Pearson	0.990656	IsoQuant(ReduceAnno20)
human	human_heart_rep1	3M	ReduceAnno20	IsoQuant	Spearman	0.98948	IsoQuant(ReduceAnno20)
mouse	mouse_heart_rep1	12M	ReduceAnno40	Mandalorion	CCC.est	0.989445	Mandalorion(ReduceAnno40)
mouse	mouse_heart_rep1	12M	ReduceAnno40	Mandalorion	NRMSE	0.0574113	Mandalorion(ReduceAnno40)
mouse	mouse_heart_rep1	12M	ReduceAnno40	Mandalorion	Pearson	0.995124	Mandalorion(ReduceAnno40)
mouse	mouse_heart_rep1	12M	ReduceAnno40	Mandalorion	Spearman	0.985798	Mandalorion(ReduceAnno40)
human	human_brain_rep1	6M	FullAnno	IsoQuant	CCC.est	0.992669	IsoQuant(FullAnno)
human	human_brain_rep1	6M	FullAnno	IsoQuant	NRMSE	0.0720505	IsoQuant(FullAnno)
human	human_brain_rep1	6M	FullAnno	IsoQuant	Pearson	0.992748	IsoQuant(FullAnno)
human	human_brain_rep1	6M	FullAnno	IsoQuant	Spearman	0.989498	IsoQuant(FullAnno)
human	human_heart_rep1	20M	FullAnno	Mandalorion	CCC.est	0.988183	Mandalorion(FullAnno)
human	human_heart_rep1	20M	FullAnno	Mandalorion	NRMSE	0.0664392	Mandalorion(FullAnno)
human	human_heart_rep1	20M	FullAnno	Mandalorion	Pearson	0.994701	Mandalorion(FullAnno)
human	human_heart_rep1	20M	FullAnno	Mandalorion	Spearman	0.985799	Mandalorion(FullAnno)
mouse	mouse_brain_rep2	6M	ReduceAnno40	IsoQuant	CCC.est	0.992062	IsoQuant(ReduceAnno40)
mouse	mouse_brain_rep2	6M	ReduceAnno40	IsoQuant	NRMSE	0.057339	IsoQuant(ReduceAnno40)
mouse	mouse_brain_rep2	6M	ReduceAnno40	IsoQuant	Pearson	0.99209	IsoQuant(ReduceAnno40)
mouse	mouse_brain_rep2	6M	ReduceAnno40	IsoQuant	Spearman	0.989512	IsoQuant(ReduceAnno40)
mouse	mouse_heart_rep1	20M	ReduceAnno40	Mandalorion	CCC.est	0.99093	Mandalorion(ReduceAnno40)
mouse	mouse_heart_rep1	20M	ReduceAnno40	Mandalorion	NRMSE	0.0480244	Mandalorion(ReduceAnno40)
mouse	mouse_heart_rep1	20M	ReduceAnno40	Mandalorion	Pearson	0.99554	Mandalorion(ReduceAnno40)
mouse	mouse_heart_rep1	20M	ReduceAnno40	Mandalorion	Spearman	0.98591	Mandalorion(ReduceAnno40)
human	human_brain_rep2	6M	NoAnno	Mandalorion	CCC.est	0.985658	Mandalorion(NoAnno)
human	human_brain_rep2	6M	NoAnno	Mandalorion	NRMSE	0.0764403	Mandalorion(NoAnno)
human	human_brain_rep2	6M	NoAnno	Mandalorion	Pearson	0.993043	Mandalorion(NoAnno)
human	human_brain_rep2	6M	NoAnno	Mandalorion	Spearman	0.985928	Mandalorion(NoAnno)
human	human_heart_rep1	20M	ReduceAnno20	Mandalorion	CCC.est	0.988237	Mandalorion(ReduceAnno20)
human	human_heart_rep1	20M	ReduceAnno20	Mandalorion	NRMSE	0.0662513	Mandalorion(ReduceAnno20)
human	human_heart_rep1	20M	ReduceAnno20	Mandalorion	Pearson	0.994696	Mandalorion(ReduceAnno20)
human	human_heart_rep1	20M	ReduceAnno20	Mandalorion	Spearman	0.985936	Mandalorion(ReduceAnno20)
human	human_heart_rep1	3M	NoAnno	Bambu	CCC.est	0.990985	Bambu(NoAnno)
human	human_heart_rep1	3M	NoAnno	Bambu	NRMSE	0.0684032	Bambu(NoAnno)
human	human_heart_rep1	3M	NoAnno	Bambu	Pearson	0.991036	Bambu(NoAnno)
human	human_heart_rep1	3M	NoAnno	Bambu	Spearman	0.988084	Bambu(NoAnno)
human	human_brain_rep1	12M	NoAnno	Mandalorion	CCC.est	0.987836	Mandalorion(NoAnno)
human	human_brain_rep1	12M	NoAnno	Mandalorion	NRMSE	0.0721789	Mandalorion(NoAnno)
human	human_brain_rep1	12M	NoAnno	Mandalorion	Pearson	0.994551	Mandalorion(NoAnno)
human	human_brain_rep1	12M	NoAnno	Mandalorion	Spearman	0.986075	Mandalorion(NoAnno)
mouse	mouse_heart_rep1	20M	FullAnno	ISAtools	CCC.est	0.992326	ISAtools(FullAnno)
mouse	mouse_heart_rep1	20M	FullAnno	ISAtools	NRMSE	0.043877	ISAtools(FullAnno)
mouse	mouse_heart_rep1	20M	FullAnno	ISAtools	Pearson	0.993314	ISAtools(FullAnno)
mouse	mouse_heart_rep1	20M	FullAnno	ISAtools	Spearman	0.981198	ISAtools(FullAnno)
mouse	mouse_heart_rep2	3M	ReduceAnno40	ISAtools	CCC.est	0.992822	ISAtools(ReduceAnno40)
mouse	mouse_heart_rep2	3M	ReduceAnno40	ISAtools	NRMSE	0.0634363	ISAtools(ReduceAnno40)
mouse	mouse_heart_rep2	3M	ReduceAnno40	ISAtools	Pearson	0.993321	ISAtools(ReduceAnno40)
mouse	mouse_heart_rep2	3M	ReduceAnno40	ISAtools	Spearman	0.984785	ISAtools(ReduceAnno40)
human	human_heart_rep1	20M	ReduceAnno40	Mandalorion	CCC.est	0.988416	Mandalorion(ReduceAnno40)
human	human_heart_rep1	20M	ReduceAnno40	Mandalorion	NRMSE	0.0657612	Mandalorion(ReduceAnno40)
human	human_heart_rep1	20M	ReduceAnno40	Mandalorion	Pearson	0.994754	Mandalorion(ReduceAnno40)
human	human_heart_rep1	20M	ReduceAnno40	Mandalorion	Spearman	0.986252	Mandalorion(ReduceAnno40)
mouse	mouse_heart_rep1	20M	ReduceAnno40	ISAtools	CCC.est	0.992562	ISAtools(ReduceAnno40)
mouse	mouse_heart_rep1	20M	ReduceAnno40	ISAtools	NRMSE	0.0430912	ISAtools(ReduceAnno40)
mouse	mouse_heart_rep1	20M	ReduceAnno40	ISAtools	Pearson	0.993337	ISAtools(ReduceAnno40)
mouse	mouse_heart_rep1	20M	ReduceAnno40	ISAtools	Spearman	0.982316	ISAtools(ReduceAnno40)
mouse	mouse_heart_rep2	12M	NoAnno	Mandalorion	CCC.est	0.990008	Mandalorion(NoAnno)
mouse	mouse_heart_rep2	12M	NoAnno	Mandalorion	NRMSE	0.0557168	Mandalorion(NoAnno)
mouse	mouse_heart_rep2	12M	NoAnno	Mandalorion	Pearson	0.995392	Mandalorion(NoAnno)
mouse	mouse_heart_rep2	12M	NoAnno	Mandalorion	Spearman	0.986405	Mandalorion(NoAnno)
mouse	mouse_heart_rep2	3M	ReduceAnno20	ISAtools	CCC.est	0.992738	ISAtools(ReduceAnno20)
mouse	mouse_heart_rep2	3M	ReduceAnno20	ISAtools	NRMSE	0.0642122	ISAtools(ReduceAnno20)
mouse	mouse_heart_rep2	3M	ReduceAnno20	ISAtools	Pearson	0.993343	ISAtools(ReduceAnno20)
mouse	mouse_heart_rep2	3M	ReduceAnno20	ISAtools	Spearman	0.984361	ISAtools(ReduceAnno20)
human	human_heart_rep2	6M	NoAnno	Mandalorion	CCC.est	0.987617	Mandalorion(NoAnno)
human	human_heart_rep2	6M	NoAnno	Mandalorion	NRMSE	0.0740316	Mandalorion(NoAnno)
human	human_heart_rep2	6M	NoAnno	Mandalorion	Pearson	0.993972	Mandalorion(NoAnno)
human	human_heart_rep2	6M	NoAnno	Mandalorion	Spearman	0.986437	Mandalorion(NoAnno)
mouse	mouse_heart_rep2	12M	NoAnno	ISAtools	CCC.est	0.992671	ISAtools(NoAnno)
mouse	mouse_heart_rep2	12M	NoAnno	ISAtools	NRMSE	0.0472336	ISAtools(NoAnno)
mouse	mouse_heart_rep2	12M	NoAnno	ISAtools	Pearson	0.993356	ISAtools(NoAnno)
mouse	mouse_heart_rep2	12M	NoAnno	ISAtools	Spearman	0.983455	ISAtools(NoAnno)
human	human_heart_rep2	6M	NoAnno	IsoQuant	CCC.est	0.992639	IsoQuant(NoAnno)
human	human_heart_rep2	6M	NoAnno	IsoQuant	NRMSE	0.0589887	IsoQuant(NoAnno)
human	human_heart_rep2	6M	NoAnno	IsoQuant	Pearson	0.992659	IsoQuant(NoAnno)
human	human_heart_rep2	6M	NoAnno	IsoQuant	Spearman	0.989654	IsoQuant(NoAnno)
human	human_heart_rep1	12M	FullAnno	Mandalorion	CCC.est	0.988496	Mandalorion(FullAnno)
human	human_heart_rep1	12M	FullAnno	Mandalorion	NRMSE	0.0716952	Mandalorion(FullAnno)
human	human_heart_rep1	12M	FullAnno	Mandalorion	Pearson	0.994748	Mandalorion(FullAnno)
human	human_heart_rep1	12M	FullAnno	Mandalorion	Spearman	0.986444	Mandalorion(FullAnno)
human	human_heart_rep1	20M	FullAnno	Bambu	CCC.est	0.98705	Bambu(FullAnno)
human	human_heart_rep1	20M	FullAnno	Bambu	NRMSE	0.0695401	Bambu(FullAnno)
human	human_heart_rep1	20M	FullAnno	Bambu	Pearson	0.987174	Bambu(FullAnno)
human	human_heart_rep1	20M	FullAnno	Bambu	Spearman	0.979936	Bambu(FullAnno)
mouse	mouse_brain_rep2	6M	NoAnno	ISAtools	CCC.est	0.992783	ISAtools(NoAnno)
mouse	mouse_brain_rep2	6M	NoAnno	ISAtools	NRMSE	0.0547201	ISAtools(NoAnno)
mouse	mouse_brain_rep2	6M	NoAnno	ISAtools	Pearson	0.993389	ISAtools(NoAnno)
mouse	mouse_brain_rep2	6M	NoAnno	ISAtools	Spearman	0.986464	ISAtools(NoAnno)
mouse	mouse_brain_rep2	20M	ReduceAnno40	Bambu	CCC.est	0.980102	Bambu(ReduceAnno40)
mouse	mouse_brain_rep2	20M	ReduceAnno40	Bambu	NRMSE	0.0695453	Bambu(ReduceAnno40)
mouse	mouse_brain_rep2	20M	ReduceAnno40	Bambu	Pearson	0.980405	Bambu(ReduceAnno40)
mouse	mouse_brain_rep2	20M	ReduceAnno40	Bambu	Spearman	0.97657	Bambu(ReduceAnno40)
mouse	mouse_heart_rep2	20M	NoAnno	Mandalorion	CCC.est	0.991359	Mandalorion(NoAnno)
mouse	mouse_heart_rep2	20M	NoAnno	Mandalorion	NRMSE	0.0467569	Mandalorion(NoAnno)
mouse	mouse_heart_rep2	20M	NoAnno	Mandalorion	Pearson	0.995687	Mandalorion(NoAnno)
mouse	mouse_heart_rep2	20M	NoAnno	Mandalorion	Spearman	0.98646	Mandalorion(NoAnno)
mouse	mouse_brain_rep1	12M	FullAnno	Mandalorion	CCC.est	0.988429	Mandalorion(FullAnno)
mouse	mouse_brain_rep1	12M	FullAnno	Mandalorion	NRMSE	0.0596674	Mandalorion(FullAnno)
mouse	mouse_brain_rep1	12M	FullAnno	Mandalorion	Pearson	0.994732	Mandalorion(FullAnno)
mouse	mouse_brain_rep1	12M	FullAnno	Mandalorion	Spearman	0.986672	Mandalorion(FullAnno)
human	human_heart_rep1	3M	ReduceAnno40	ISAtools	CCC.est	0.99321	ISAtools(ReduceAnno40)
human	human_heart_rep1	3M	ReduceAnno40	ISAtools	NRMSE	0.0753386	ISAtools(ReduceAnno40)
human	human_heart_rep1	3M	ReduceAnno40	ISAtools	Pearson	0.99344	ISAtools(ReduceAnno40)
human	human_heart_rep1	3M	ReduceAnno40	ISAtools	Spearman	0.990378	ISAtools(ReduceAnno40)
human	human_heart_rep1	12M	ReduceAnno20	Mandalorion	CCC.est	0.988547	Mandalorion(ReduceAnno20)
human	human_heart_rep1	12M	ReduceAnno20	Mandalorion	NRMSE	0.0714399	Mandalorion(ReduceAnno20)
human	human_heart_rep1	12M	ReduceAnno20	Mandalorion	Pearson	0.994718	Mandalorion(ReduceAnno20)
human	human_heart_rep1	12M	ReduceAnno20	Mandalorion	Spearman	0.986758	Mandalorion(ReduceAnno20)
mouse	mouse_heart_rep1	20M	NoAnno	Mandalorion	CCC.est	0.991244	Mandalorion(NoAnno)
mouse	mouse_heart_rep1	20M	NoAnno	Mandalorion	NRMSE	0.0470264	Mandalorion(NoAnno)
mouse	mouse_heart_rep1	20M	NoAnno	Mandalorion	Pearson	0.995578	Mandalorion(NoAnno)
mouse	mouse_heart_rep1	20M	NoAnno	Mandalorion	Spearman	0.986763	Mandalorion(NoAnno)
mouse	mouse_heart_rep1	12M	NoAnno	Mandalorion	CCC.est	0.989885	Mandalorion(NoAnno)
mouse	mouse_heart_rep1	12M	NoAnno	Mandalorion	NRMSE	0.0559641	Mandalorion(NoAnno)
mouse	mouse_heart_rep1	12M	NoAnno	Mandalorion	Pearson	0.995264	Mandalorion(NoAnno)
mouse	mouse_heart_rep1	12M	NoAnno	Mandalorion	Spearman	0.98678	Mandalorion(NoAnno)
mouse	mouse_brain_rep1	12M	ReduceAnno20	Mandalorion	CCC.est	0.988506	Mandalorion(ReduceAnno20)
mouse	mouse_brain_rep1	12M	ReduceAnno20	Mandalorion	NRMSE	0.0593896	Mandalorion(ReduceAnno20)
mouse	mouse_brain_rep1	12M	ReduceAnno20	Mandalorion	Pearson	0.994739	Mandalorion(ReduceAnno20)
mouse	mouse_brain_rep1	12M	ReduceAnno20	Mandalorion	Spearman	0.986847	Mandalorion(ReduceAnno20)
mouse	mouse_heart_rep1	3M	ReduceAnno40	ISAtools	CCC.est	0.99293	ISAtools(ReduceAnno40)
mouse	mouse_heart_rep1	3M	ReduceAnno40	ISAtools	NRMSE	0.0628807	ISAtools(ReduceAnno40)
mouse	mouse_heart_rep1	3M	ReduceAnno40	ISAtools	Pearson	0.993449	ISAtools(ReduceAnno40)
mouse	mouse_heart_rep1	3M	ReduceAnno40	ISAtools	Spearman	0.985074	ISAtools(ReduceAnno40)
human	human_heart_rep1	12M	NoAnno	IsoQuant	CCC.est	0.99225	IsoQuant(NoAnno)
human	human_heart_rep1	12M	NoAnno	IsoQuant	NRMSE	0.0585974	IsoQuant(NoAnno)
human	human_heart_rep1	12M	NoAnno	IsoQuant	Pearson	0.992271	IsoQuant(NoAnno)
human	human_heart_rep1	12M	NoAnno	IsoQuant	Spearman	0.990001	IsoQuant(NoAnno)
mouse	mouse_brain_rep1	12M	NoAnno	IsoQuant	CCC.est	0.992554	IsoQuant(NoAnno)
mouse	mouse_brain_rep1	12M	NoAnno	IsoQuant	NRMSE	0.0465021	IsoQuant(NoAnno)
mouse	mouse_brain_rep1	12M	NoAnno	IsoQuant	Pearson	0.992612	IsoQuant(NoAnno)
mouse	mouse_brain_rep1	12M	NoAnno	IsoQuant	Spearman	0.990002	IsoQuant(NoAnno)
mouse	mouse_brain_rep1	20M	FullAnno	Mandalorion	CCC.est	0.989654	Mandalorion(FullAnno)
mouse	mouse_brain_rep1	20M	FullAnno	Mandalorion	NRMSE	0.0510651	Mandalorion(FullAnno)
mouse	mouse_brain_rep1	20M	FullAnno	Mandalorion	Pearson	0.994841	Mandalorion(FullAnno)
mouse	mouse_brain_rep1	20M	FullAnno	Mandalorion	Spearman	0.98686	Mandalorion(FullAnno)
mouse	mouse_heart_rep2	20M	NoAnno	ISAtools	CCC.est	0.992806	ISAtools(NoAnno)
mouse	mouse_heart_rep2	20M	NoAnno	ISAtools	NRMSE	0.0423029	ISAtools(NoAnno)
mouse	mouse_heart_rep2	20M	NoAnno	ISAtools	Pearson	0.993467	ISAtools(NoAnno)
mouse	mouse_heart_rep2	20M	NoAnno	ISAtools	Spearman	0.982542	ISAtools(NoAnno)
mouse	mouse_brain_rep2	20M	FullAnno	Mandalorion	CCC.est	0.990428	Mandalorion(FullAnno)
mouse	mouse_brain_rep2	20M	FullAnno	Mandalorion	NRMSE	0.049107	Mandalorion(FullAnno)
mouse	mouse_brain_rep2	20M	FullAnno	Mandalorion	Pearson	0.995297	Mandalorion(FullAnno)
mouse	mouse_brain_rep2	20M	FullAnno	Mandalorion	Spearman	0.986955	Mandalorion(FullAnno)
human	human_heart_rep2	6M	FullAnno	Bambu	CCC.est	0.989925	Bambu(FullAnno)
human	human_heart_rep2	6M	FullAnno	Bambu	NRMSE	0.0706121	Bambu(FullAnno)
human	human_heart_rep2	6M	FullAnno	Bambu	Pearson	0.99001	Bambu(FullAnno)
human	human_heart_rep2	6M	FullAnno	Bambu	Spearman	0.981573	Bambu(FullAnno)
human	human_heart_rep1	3M	ReduceAnno40	IsoQuant	CCC.est	0.991098	IsoQuant(ReduceAnno40)
human	human_heart_rep1	3M	ReduceAnno40	IsoQuant	NRMSE	0.090205	IsoQuant(ReduceAnno40)
human	human_heart_rep1	3M	ReduceAnno40	IsoQuant	Pearson	0.991098	IsoQuant(ReduceAnno40)
human	human_heart_rep1	3M	ReduceAnno40	IsoQuant	Spearman	0.990031	IsoQuant(ReduceAnno40)
mouse	mouse_brain_rep1	3M	ReduceAnno20	IsoQuant	CCC.est	0.992221	IsoQuant(ReduceAnno20)
mouse	mouse_brain_rep1	3M	ReduceAnno20	IsoQuant	NRMSE	0.0694349	IsoQuant(ReduceAnno20)
mouse	mouse_brain_rep1	3M	ReduceAnno20	IsoQuant	Pearson	0.992243	IsoQuant(ReduceAnno20)
mouse	mouse_brain_rep1	3M	ReduceAnno20	IsoQuant	Spearman	0.990292	IsoQuant(ReduceAnno20)
human	human_heart_rep1	12M	ReduceAnno40	Mandalorion	CCC.est	0.988662	Mandalorion(ReduceAnno40)
human	human_heart_rep1	12M	ReduceAnno40	Mandalorion	NRMSE	0.0710661	Mandalorion(ReduceAnno40)
human	human_heart_rep1	12M	ReduceAnno40	Mandalorion	Pearson	0.994738	Mandalorion(ReduceAnno40)
human	human_heart_rep1	12M	ReduceAnno40	Mandalorion	Spearman	0.986971	Mandalorion(ReduceAnno40)
human	human_heart_rep1	20M	NoAnno	Mandalorion	CCC.est	0.989014	Mandalorion(NoAnno)
human	human_heart_rep1	20M	NoAnno	Mandalorion	NRMSE	0.0639921	Mandalorion(NoAnno)
human	human_heart_rep1	20M	NoAnno	Mandalorion	Pearson	0.994975	Mandalorion(NoAnno)
human	human_heart_rep1	20M	NoAnno	Mandalorion	Spearman	0.987114	Mandalorion(NoAnno)
mouse	mouse_brain_rep1	12M	ReduceAnno40	Mandalorion	CCC.est	0.988699	Mandalorion(ReduceAnno40)
mouse	mouse_brain_rep1	12M	ReduceAnno40	Mandalorion	NRMSE	0.0588047	Mandalorion(ReduceAnno40)
mouse	mouse_brain_rep1	12M	ReduceAnno40	Mandalorion	Pearson	0.994824	Mandalorion(ReduceAnno40)
mouse	mouse_brain_rep1	12M	ReduceAnno40	Mandalorion	Spearman	0.987176	Mandalorion(ReduceAnno40)
mouse	mouse_heart_rep1	6M	ReduceAnno20	ISAtools	CCC.est	0.99277	ISAtools(ReduceAnno20)
mouse	mouse_heart_rep1	6M	ReduceAnno20	ISAtools	NRMSE	0.0560935	ISAtools(ReduceAnno20)
mouse	mouse_heart_rep1	6M	ReduceAnno20	ISAtools	Pearson	0.993494	ISAtools(ReduceAnno20)
mouse	mouse_heart_rep1	6M	ReduceAnno20	ISAtools	Spearman	0.985202	ISAtools(ReduceAnno20)
mouse	mouse_brain_rep2	20M	ReduceAnno20	Mandalorion	CCC.est	0.990514	Mandalorion(ReduceAnno20)
mouse	mouse_brain_rep2	20M	ReduceAnno20	Mandalorion	NRMSE	0.0488305	Mandalorion(ReduceAnno20)
mouse	mouse_brain_rep2	20M	ReduceAnno20	Mandalorion	Pearson	0.995316	Mandalorion(ReduceAnno20)
mouse	mouse_brain_rep2	20M	ReduceAnno20	Mandalorion	Spearman	0.987202	Mandalorion(ReduceAnno20)
human	human_brain_rep1	3M	ReduceAnno20	IsoQuant	CCC.est	0.991745	IsoQuant(ReduceAnno20)
human	human_brain_rep1	3M	ReduceAnno20	IsoQuant	NRMSE	0.0891716	IsoQuant(ReduceAnno20)
human	human_brain_rep1	3M	ReduceAnno20	IsoQuant	Pearson	0.991747	IsoQuant(ReduceAnno20)
human	human_brain_rep1	3M	ReduceAnno20	IsoQuant	Spearman	0.990324	IsoQuant(ReduceAnno20)
mouse	mouse_brain_rep1	3M	FullAnno	ISAtools	CCC.est	0.992698	ISAtools(FullAnno)
mouse	mouse_brain_rep1	3M	FullAnno	ISAtools	NRMSE	0.0674104	ISAtools(FullAnno)
mouse	mouse_brain_rep1	3M	FullAnno	ISAtools	Pearson	0.993495	ISAtools(FullAnno)
mouse	mouse_brain_rep1	3M	FullAnno	ISAtools	Spearman	0.988959	ISAtools(FullAnno)
mouse	mouse_brain_rep2	12M	NoAnno	IsoQuant	CCC.est	0.992609	IsoQuant(NoAnno)
mouse	mouse_brain_rep2	12M	NoAnno	IsoQuant	NRMSE	0.046626	IsoQuant(NoAnno)
mouse	mouse_brain_rep2	12M	NoAnno	IsoQuant	Pearson	0.992655	IsoQuant(NoAnno)
mouse	mouse_brain_rep2	12M	NoAnno	IsoQuant	Spearman	0.990437	IsoQuant(NoAnno)
mouse	mouse_brain_rep1	20M	ReduceAnno20	Mandalorion	CCC.est	0.989926	Mandalorion(ReduceAnno20)
mouse	mouse_brain_rep1	20M	ReduceAnno20	Mandalorion	NRMSE	0.0503304	Mandalorion(ReduceAnno20)
mouse	mouse_brain_rep1	20M	ReduceAnno20	Mandalorion	Pearson	0.99501	Mandalorion(ReduceAnno20)
mouse	mouse_brain_rep1	20M	ReduceAnno20	Mandalorion	Spearman	0.987258	Mandalorion(ReduceAnno20)
mouse	mouse_brain_rep1	12M	ReduceAnno40	Bambu	CCC.est	0.982734	Bambu(ReduceAnno40)
mouse	mouse_brain_rep1	12M	ReduceAnno40	Bambu	NRMSE	0.0715443	Bambu(ReduceAnno40)
mouse	mouse_brain_rep1	12M	ReduceAnno40	Bambu	Pearson	0.982986	Bambu(ReduceAnno40)
mouse	mouse_brain_rep1	12M	ReduceAnno40	Bambu	Spearman	0.97825	Bambu(ReduceAnno40)
mouse	mouse_brain_rep2	12M	FullAnno	Mandalorion	CCC.est	0.989262	Mandalorion(FullAnno)
mouse	mouse_brain_rep2	12M	FullAnno	Mandalorion	NRMSE	0.0579762	Mandalorion(FullAnno)
mouse	mouse_brain_rep2	12M	FullAnno	Mandalorion	Pearson	0.99501	Mandalorion(FullAnno)
mouse	mouse_brain_rep2	12M	FullAnno	Mandalorion	Spearman	0.987297	Mandalorion(FullAnno)
human	human_brain_rep2	3M	FullAnno	Bambu	CCC.est	0.992281	Bambu(FullAnno)
human	human_brain_rep2	3M	FullAnno	Bambu	NRMSE	0.0717784	Bambu(FullAnno)
human	human_brain_rep2	3M	FullAnno	Bambu	Pearson	0.99234	Bambu(FullAnno)
human	human_brain_rep2	3M	FullAnno	Bambu	Spearman	0.985428	Bambu(FullAnno)
mouse	mouse_brain_rep1	20M	ReduceAnno40	Mandalorion	CCC.est	0.990074	Mandalorion(ReduceAnno40)
mouse	mouse_brain_rep1	20M	ReduceAnno40	Mandalorion	NRMSE	0.0498942	Mandalorion(ReduceAnno40)
mouse	mouse_brain_rep1	20M	ReduceAnno40	Mandalorion	Pearson	0.995072	Mandalorion(ReduceAnno40)
mouse	mouse_brain_rep1	20M	ReduceAnno40	Mandalorion	Spearman	0.987599	Mandalorion(ReduceAnno40)
human	human_brain_rep1	3M	NoAnno	IsoQuant	CCC.est	0.991894	IsoQuant(NoAnno)
human	human_brain_rep1	3M	NoAnno	IsoQuant	NRMSE	0.0653277	IsoQuant(NoAnno)
human	human_brain_rep1	3M	NoAnno	IsoQuant	Pearson	0.991896	IsoQuant(NoAnno)
human	human_brain_rep1	3M	NoAnno	IsoQuant	Spearman	0.99055	IsoQuant(NoAnno)
mouse	mouse_brain_rep2	12M	ReduceAnno20	Mandalorion	CCC.est	0.989365	Mandalorion(ReduceAnno20)
mouse	mouse_brain_rep2	12M	ReduceAnno20	Mandalorion	NRMSE	0.0576196	Mandalorion(ReduceAnno20)
mouse	mouse_brain_rep2	12M	ReduceAnno20	Mandalorion	Pearson	0.995051	Mandalorion(ReduceAnno20)
mouse	mouse_brain_rep2	12M	ReduceAnno20	Mandalorion	Spearman	0.987604	Mandalorion(ReduceAnno20)
mouse	mouse_brain_rep1	3M	FullAnno	Mandalorion	CCC.est	0.983811	Mandalorion(FullAnno)
mouse	mouse_brain_rep1	3M	FullAnno	Mandalorion	NRMSE	0.072297	Mandalorion(FullAnno)
mouse	mouse_brain_rep1	3M	FullAnno	Mandalorion	Pearson	0.992753	Mandalorion(FullAnno)
mouse	mouse_brain_rep1	3M	FullAnno	Mandalorion	Spearman	0.987664	Mandalorion(FullAnno)
human	human_brain_rep1	3M	NoAnno	Bambu	CCC.est	0.989638	Bambu(NoAnno)
human	human_brain_rep1	3M	NoAnno	Bambu	NRMSE	0.0723161	Bambu(NoAnno)
human	human_brain_rep1	3M	NoAnno	Bambu	Pearson	0.989699	Bambu(NoAnno)
human	human_brain_rep1	3M	NoAnno	Bambu	Spearman	0.986034	Bambu(NoAnno)
mouse	mouse_brain_rep2	20M	ReduceAnno40	Mandalorion	CCC.est	0.990891	Mandalorion(ReduceAnno40)
mouse	mouse_brain_rep2	20M	ReduceAnno40	Mandalorion	NRMSE	0.0478022	Mandalorion(ReduceAnno40)
mouse	mouse_brain_rep2	20M	ReduceAnno40	Mandalorion	Pearson	0.995586	Mandalorion(ReduceAnno40)
mouse	mouse_brain_rep2	20M	ReduceAnno40	Mandalorion	Spearman	0.987722	Mandalorion(ReduceAnno40)
human	human_heart_rep1	3M	ReduceAnno20	ISAtools	CCC.est	0.993253	ISAtools(ReduceAnno20)
human	human_heart_rep1	3M	ReduceAnno20	ISAtools	NRMSE	0.0783384	ISAtools(ReduceAnno20)
human	human_heart_rep1	3M	ReduceAnno20	ISAtools	Pearson	0.993525	ISAtools(ReduceAnno20)
human	human_heart_rep1	3M	ReduceAnno20	ISAtools	Spearman	0.989268	ISAtools(ReduceAnno20)
mouse	mouse_heart_rep1	6M	FullAnno	Mandalorion	CCC.est	0.989209	Mandalorion(FullAnno)
mouse	mouse_heart_rep1	6M	FullAnno	Mandalorion	NRMSE	0.067174	Mandalorion(FullAnno)
mouse	mouse_heart_rep1	6M	FullAnno	Mandalorion	Pearson	0.994939	Mandalorion(FullAnno)
mouse	mouse_heart_rep1	6M	FullAnno	Mandalorion	Spearman	0.987929	Mandalorion(FullAnno)
mouse	mouse_heart_rep2	20M	ReduceAnno40	Bambu	CCC.est	0.978478	Bambu(ReduceAnno40)
mouse	mouse_heart_rep2	20M	ReduceAnno40	Bambu	NRMSE	0.0728753	Bambu(ReduceAnno40)
mouse	mouse_heart_rep2	20M	ReduceAnno40	Bambu	Pearson	0.978804	Bambu(ReduceAnno40)
mouse	mouse_heart_rep2	20M	ReduceAnno40	Bambu	Spearman	0.972987	Bambu(ReduceAnno40)
mouse	mouse_heart_rep2	6M	NoAnno	ISAtools	CCC.est	0.992995	ISAtools(NoAnno)
mouse	mouse_heart_rep2	6M	NoAnno	ISAtools	NRMSE	0.0546044	ISAtools(NoAnno)
mouse	mouse_heart_rep2	6M	NoAnno	ISAtools	Pearson	0.993531	ISAtools(NoAnno)
mouse	mouse_heart_rep2	6M	NoAnno	ISAtools	Spearman	0.985953	ISAtools(NoAnno)
mouse	mouse_brain_rep2	12M	ReduceAnno40	Mandalorion	CCC.est	0.989624	Mandalorion(ReduceAnno40)
mouse	mouse_brain_rep2	12M	ReduceAnno40	Mandalorion	NRMSE	0.0568417	Mandalorion(ReduceAnno40)
mouse	mouse_brain_rep2	12M	ReduceAnno40	Mandalorion	Pearson	0.995211	Mandalorion(ReduceAnno40)
mouse	mouse_brain_rep2	12M	ReduceAnno40	Mandalorion	Spearman	0.987937	Mandalorion(ReduceAnno40)
mouse	mouse_brain_rep1	20M	ReduceAnno20	Bambu	CCC.est	0.978559	Bambu(ReduceAnno20)
mouse	mouse_brain_rep1	20M	ReduceAnno20	Bambu	NRMSE	0.0732063	Bambu(ReduceAnno20)
mouse	mouse_brain_rep1	20M	ReduceAnno20	Bambu	Pearson	0.978875	Bambu(ReduceAnno20)
mouse	mouse_brain_rep1	20M	ReduceAnno20	Bambu	Spearman	0.973529	Bambu(ReduceAnno20)
human	human_brain_rep2	3M	NoAnno	Bambu	CCC.est	0.990654	Bambu(NoAnno)
human	human_brain_rep2	3M	NoAnno	Bambu	NRMSE	0.0732743	Bambu(NoAnno)
human	human_brain_rep2	3M	NoAnno	Bambu	Pearson	0.990666	Bambu(NoAnno)
human	human_brain_rep2	3M	NoAnno	Bambu	Spearman	0.988772	Bambu(NoAnno)
mouse	mouse_brain_rep2	3M	FullAnno	IsoQuant	CCC.est	0.993613	IsoQuant(FullAnno)
mouse	mouse_brain_rep2	3M	FullAnno	IsoQuant	NRMSE	0.0643783	IsoQuant(FullAnno)
mouse	mouse_brain_rep2	3M	FullAnno	IsoQuant	Pearson	0.993678	IsoQuant(FullAnno)
mouse	mouse_brain_rep2	3M	FullAnno	IsoQuant	Spearman	0.990677	IsoQuant(FullAnno)
mouse	mouse_heart_rep1	3M	ReduceAnno20	ISAtools	CCC.est	0.992926	ISAtools(ReduceAnno20)
mouse	mouse_heart_rep1	3M	ReduceAnno20	ISAtools	NRMSE	0.0632795	ISAtools(ReduceAnno20)
mouse	mouse_heart_rep1	3M	ReduceAnno20	ISAtools	Pearson	0.993552	ISAtools(ReduceAnno20)
mouse	mouse_heart_rep1	3M	ReduceAnno20	ISAtools	Spearman	0.985354	ISAtools(ReduceAnno20)
mouse	mouse_brain_rep1	3M	ReduceAnno20	Mandalorion	CCC.est	0.983936	Mandalorion(ReduceAnno20)
mouse	mouse_brain_rep1	3M	ReduceAnno20	Mandalorion	NRMSE	0.0718526	Mandalorion(ReduceAnno20)
mouse	mouse_brain_rep1	3M	ReduceAnno20	Mandalorion	Pearson	0.992817	Mandalorion(ReduceAnno20)
mouse	mouse_brain_rep1	3M	ReduceAnno20	Mandalorion	Spearman	0.987955	Mandalorion(ReduceAnno20)
human	human_heart_rep1	12M	NoAnno	Mandalorion	CCC.est	0.989295	Mandalorion(NoAnno)
human	human_heart_rep1	12M	NoAnno	Mandalorion	NRMSE	0.0689059	Mandalorion(NoAnno)
human	human_heart_rep1	12M	NoAnno	Mandalorion	Pearson	0.995041	Mandalorion(NoAnno)
human	human_heart_rep1	12M	NoAnno	Mandalorion	Spearman	0.987968	Mandalorion(NoAnno)
mouse	mouse_heart_rep2	6M	FullAnno	Mandalorion	CCC.est	0.989341	Mandalorion(FullAnno)
mouse	mouse_heart_rep2	6M	FullAnno	Mandalorion	NRMSE	0.0667841	Mandalorion(FullAnno)
mouse	mouse_heart_rep2	6M	FullAnno	Mandalorion	Pearson	0.995011	Mandalorion(FullAnno)
mouse	mouse_heart_rep2	6M	FullAnno	Mandalorion	Spearman	0.988034	Mandalorion(FullAnno)
mouse	mouse_brain_rep2	20M	ReduceAnno20	Bambu	CCC.est	0.977982	Bambu(ReduceAnno20)
mouse	mouse_brain_rep2	20M	ReduceAnno20	Bambu	NRMSE	0.0740762	Bambu(ReduceAnno20)
mouse	mouse_brain_rep2	20M	ReduceAnno20	Bambu	Pearson	0.97824	Bambu(ReduceAnno20)
mouse	mouse_brain_rep2	20M	ReduceAnno20	Bambu	Spearman	0.972733	Bambu(ReduceAnno20)
mouse	mouse_heart_rep1	6M	NoAnno	ISAtools	CCC.est	0.993105	ISAtools(NoAnno)
mouse	mouse_heart_rep1	6M	NoAnno	ISAtools	NRMSE	0.0540255	ISAtools(NoAnno)
mouse	mouse_heart_rep1	6M	NoAnno	ISAtools	Pearson	0.993642	ISAtools(NoAnno)
mouse	mouse_heart_rep1	6M	NoAnno	ISAtools	Spearman	0.986428	ISAtools(NoAnno)
mouse	mouse_brain_rep1	6M	FullAnno	Mandalorion	CCC.est	0.9882	Mandalorion(FullAnno)
mouse	mouse_brain_rep1	6M	FullAnno	Mandalorion	NRMSE	0.0683728	Mandalorion(FullAnno)
mouse	mouse_brain_rep1	6M	FullAnno	Mandalorion	Pearson	0.994564	Mandalorion(FullAnno)
mouse	mouse_brain_rep1	6M	FullAnno	Mandalorion	Spearman	0.988242	Mandalorion(FullAnno)
human	human_heart_rep1	6M	FullAnno	ISAtools	CCC.est	0.993	ISAtools(FullAnno)
human	human_heart_rep1	6M	FullAnno	ISAtools	NRMSE	0.0700379	ISAtools(FullAnno)
human	human_heart_rep1	6M	FullAnno	ISAtools	Pearson	0.993657	ISAtools(FullAnno)
human	human_heart_rep1	6M	FullAnno	ISAtools	Spearman	0.988038	ISAtools(FullAnno)
mouse	mouse_brain_rep2	3M	ReduceAnno20	IsoQuant	CCC.est	0.992752	IsoQuant(ReduceAnno20)
mouse	mouse_brain_rep2	3M	ReduceAnno20	IsoQuant	NRMSE	0.0677834	IsoQuant(ReduceAnno20)
mouse	mouse_brain_rep2	3M	ReduceAnno20	IsoQuant	Pearson	0.992768	IsoQuant(ReduceAnno20)
mouse	mouse_brain_rep2	3M	ReduceAnno20	IsoQuant	Spearman	0.99077	IsoQuant(ReduceAnno20)
mouse	mouse_brain_rep1	3M	ReduceAnno40	Mandalorion	CCC.est	0.984303	Mandalorion(ReduceAnno40)
mouse	mouse_brain_rep1	3M	ReduceAnno40	Mandalorion	NRMSE	0.0708812	Mandalorion(ReduceAnno40)
mouse	mouse_brain_rep1	3M	ReduceAnno40	Mandalorion	Pearson	0.993047	Mandalorion(ReduceAnno40)
mouse	mouse_brain_rep1	3M	ReduceAnno40	Mandalorion	Spearman	0.988277	Mandalorion(ReduceAnno40)
mouse	mouse_heart_rep1	6M	ReduceAnno40	ISAtools	CCC.est	0.993025	ISAtools(ReduceAnno40)
mouse	mouse_heart_rep1	6M	ReduceAnno40	ISAtools	NRMSE	0.0548499	ISAtools(ReduceAnno40)
mouse	mouse_heart_rep1	6M	ReduceAnno40	ISAtools	Pearson	0.993668	ISAtools(ReduceAnno40)
mouse	mouse_heart_rep1	6M	ReduceAnno40	ISAtools	Spearman	0.98571	ISAtools(ReduceAnno40)
mouse	mouse_heart_rep1	20M	ReduceAnno40	Bambu	CCC.est	0.977135	Bambu(ReduceAnno40)
mouse	mouse_heart_rep1	20M	ReduceAnno40	Bambu	NRMSE	0.074686	Bambu(ReduceAnno40)
mouse	mouse_heart_rep1	20M	ReduceAnno40	Bambu	Pearson	0.977508	Bambu(ReduceAnno40)
mouse	mouse_heart_rep1	20M	ReduceAnno40	Bambu	Spearman	0.972542	Bambu(ReduceAnno40)
mouse	mouse_heart_rep1	12M	FullAnno	ISAtools	CCC.est	0.992758	ISAtools(FullAnno)
mouse	mouse_heart_rep1	12M	FullAnno	ISAtools	NRMSE	0.0472143	ISAtools(FullAnno)
mouse	mouse_heart_rep1	12M	FullAnno	ISAtools	Pearson	0.993723	ISAtools(FullAnno)
mouse	mouse_heart_rep1	12M	FullAnno	ISAtools	Spearman	0.982589	ISAtools(FullAnno)
mouse	mouse_heart_rep2	20M	ReduceAnno20	Bambu	CCC.est	0.977575	Bambu(ReduceAnno20)
mouse	mouse_heart_rep2	20M	ReduceAnno20	Bambu	NRMSE	0.0749698	Bambu(ReduceAnno20)
mouse	mouse_heart_rep2	20M	ReduceAnno20	Bambu	Pearson	0.977867	Bambu(ReduceAnno20)
mouse	mouse_heart_rep2	20M	ReduceAnno20	Bambu	Spearman	0.969849	Bambu(ReduceAnno20)
human	human_brain_rep1	3M	ReduceAnno40	IsoQuant	CCC.est	0.991929	IsoQuant(ReduceAnno40)
human	human_brain_rep1	3M	ReduceAnno40	IsoQuant	NRMSE	0.0854342	IsoQuant(ReduceAnno40)
human	human_brain_rep1	3M	ReduceAnno40	IsoQuant	Pearson	0.99193	IsoQuant(ReduceAnno40)
human	human_brain_rep1	3M	ReduceAnno40	IsoQuant	Spearman	0.990911	IsoQuant(ReduceAnno40)
mouse	mouse_brain_rep2	12M	ReduceAnno40	Bambu	CCC.est	0.981156	Bambu(ReduceAnno40)
mouse	mouse_brain_rep2	12M	ReduceAnno40	Bambu	NRMSE	0.0752855	Bambu(ReduceAnno40)
mouse	mouse_brain_rep2	12M	ReduceAnno40	Bambu	Pearson	0.981466	Bambu(ReduceAnno40)
mouse	mouse_brain_rep2	12M	ReduceAnno40	Bambu	Spearman	0.97834	Bambu(ReduceAnno40)
human	human_brain_rep1	6M	FullAnno	Bambu	CCC.est	0.992126	Bambu(FullAnno)
human	human_brain_rep1	6M	FullAnno	Bambu	NRMSE	0.0752943	Bambu(FullAnno)
human	human_brain_rep1	6M	FullAnno	Bambu	Pearson	0.992179	Bambu(FullAnno)
human	human_brain_rep1	6M	FullAnno	Bambu	Spearman	0.985852	Bambu(FullAnno)
mouse	mouse_heart_rep1	20M	NoAnno	ISAtools	CCC.est	0.993084	ISAtools(NoAnno)
mouse	mouse_heart_rep1	20M	NoAnno	ISAtools	NRMSE	0.0414044	ISAtools(NoAnno)
mouse	mouse_heart_rep1	20M	NoAnno	ISAtools	Pearson	0.993748	ISAtools(NoAnno)
mouse	mouse_heart_rep1	20M	NoAnno	ISAtools	Spearman	0.983645	ISAtools(NoAnno)
mouse	mouse_heart_rep1	6M	ReduceAnno20	Mandalorion	CCC.est	0.989352	Mandalorion(ReduceAnno20)
mouse	mouse_heart_rep1	6M	ReduceAnno20	Mandalorion	NRMSE	0.0665907	Mandalorion(ReduceAnno20)
mouse	mouse_heart_rep1	6M	ReduceAnno20	Mandalorion	Pearson	0.995011	Mandalorion(ReduceAnno20)
mouse	mouse_heart_rep1	6M	ReduceAnno20	Mandalorion	Spearman	0.988303	Mandalorion(ReduceAnno20)
human	human_heart_rep1	3M	NoAnno	IsoQuant	CCC.est	0.992082	IsoQuant(NoAnno)
human	human_heart_rep1	3M	NoAnno	IsoQuant	NRMSE	0.0657171	IsoQuant(NoAnno)
human	human_heart_rep1	3M	NoAnno	IsoQuant	Pearson	0.992084	IsoQuant(NoAnno)
human	human_heart_rep1	3M	NoAnno	IsoQuant	Spearman	0.990949	IsoQuant(NoAnno)
mouse	mouse_brain_rep1	3M	FullAnno	IsoQuant	CCC.est	0.993812	IsoQuant(FullAnno)
mouse	mouse_brain_rep1	3M	FullAnno	IsoQuant	NRMSE	0.0625847	IsoQuant(FullAnno)
mouse	mouse_brain_rep1	3M	FullAnno	IsoQuant	Pearson	0.993894	IsoQuant(FullAnno)
mouse	mouse_brain_rep1	3M	FullAnno	IsoQuant	Spearman	0.991189	IsoQuant(FullAnno)
human	human_heart_rep1	3M	FullAnno	IsoQuant	CCC.est	0.993135	IsoQuant(FullAnno)
human	human_heart_rep1	3M	FullAnno	IsoQuant	NRMSE	0.083819	IsoQuant(FullAnno)
human	human_heart_rep1	3M	FullAnno	IsoQuant	Pearson	0.99316	IsoQuant(FullAnno)
human	human_heart_rep1	3M	FullAnno	IsoQuant	Spearman	0.99125	IsoQuant(FullAnno)
mouse	mouse_heart_rep2	6M	ReduceAnno20	Mandalorion	CCC.est	0.989507	Mandalorion(ReduceAnno20)
mouse	mouse_heart_rep2	6M	ReduceAnno20	Mandalorion	NRMSE	0.0661658	Mandalorion(ReduceAnno20)
mouse	mouse_heart_rep2	6M	ReduceAnno20	Mandalorion	Pearson	0.995116	Mandalorion(ReduceAnno20)
mouse	mouse_heart_rep2	6M	ReduceAnno20	Mandalorion	Spearman	0.988365	Mandalorion(ReduceAnno20)
human	human_heart_rep1	12M	FullAnno	Bambu	CCC.est	0.98761	Bambu(FullAnno)
human	human_heart_rep1	12M	FullAnno	Bambu	NRMSE	0.0761666	Bambu(FullAnno)
human	human_heart_rep1	12M	FullAnno	Bambu	Pearson	0.987715	Bambu(FullAnno)
human	human_heart_rep1	12M	FullAnno	Bambu	Spearman	0.980658	Bambu(FullAnno)
mouse	mouse_brain_rep1	12M	NoAnno	Mandalorion	CCC.est	0.989351	Mandalorion(NoAnno)
mouse	mouse_brain_rep1	12M	NoAnno	Mandalorion	NRMSE	0.0567628	Mandalorion(NoAnno)
mouse	mouse_brain_rep1	12M	NoAnno	Mandalorion	Pearson	0.995089	Mandalorion(NoAnno)
mouse	mouse_brain_rep1	12M	NoAnno	Mandalorion	Spearman	0.988374	Mandalorion(NoAnno)
mouse	mouse_heart_rep1	6M	NoAnno	IsoQuant	CCC.est	0.992895	IsoQuant(NoAnno)
mouse	mouse_heart_rep1	6M	NoAnno	IsoQuant	NRMSE	0.0539151	IsoQuant(NoAnno)
mouse	mouse_heart_rep1	6M	NoAnno	IsoQuant	Pearson	0.992933	IsoQuant(NoAnno)
mouse	mouse_heart_rep1	6M	NoAnno	IsoQuant	Spearman	0.991334	IsoQuant(NoAnno)
mouse	mouse_heart_rep2	6M	ReduceAnno40	Mandalorion	CCC.est	0.989631	Mandalorion(ReduceAnno40)
mouse	mouse_heart_rep2	6M	ReduceAnno40	Mandalorion	NRMSE	0.0656105	Mandalorion(ReduceAnno40)
mouse	mouse_heart_rep2	6M	ReduceAnno40	Mandalorion	Pearson	0.995115	Mandalorion(ReduceAnno40)
mouse	mouse_heart_rep2	6M	ReduceAnno40	Mandalorion	Spearman	0.988589	Mandalorion(ReduceAnno40)
mouse	mouse_brain_rep2	3M	ReduceAnno40	IsoQuant	CCC.est	0.992555	IsoQuant(ReduceAnno40)
mouse	mouse_brain_rep2	3M	ReduceAnno40	IsoQuant	NRMSE	0.0676744	IsoQuant(ReduceAnno40)
mouse	mouse_brain_rep2	3M	ReduceAnno40	IsoQuant	Pearson	0.992563	IsoQuant(ReduceAnno40)
mouse	mouse_brain_rep2	3M	ReduceAnno40	IsoQuant	Spearman	0.991417	IsoQuant(ReduceAnno40)
mouse	mouse_brain_rep1	6M	ReduceAnno20	Mandalorion	CCC.est	0.988345	Mandalorion(ReduceAnno20)
mouse	mouse_brain_rep1	6M	ReduceAnno20	Mandalorion	NRMSE	0.0678271	Mandalorion(ReduceAnno20)
mouse	mouse_brain_rep1	6M	ReduceAnno20	Mandalorion	Pearson	0.99465	Mandalorion(ReduceAnno20)
mouse	mouse_brain_rep1	6M	ReduceAnno20	Mandalorion	Spearman	0.988614	Mandalorion(ReduceAnno20)
mouse	mouse_heart_rep2	20M	FullAnno	ISAtools	CCC.est	0.992792	ISAtools(FullAnno)
mouse	mouse_heart_rep2	20M	FullAnno	ISAtools	NRMSE	0.0425726	ISAtools(FullAnno)
mouse	mouse_heart_rep2	20M	FullAnno	ISAtools	Pearson	0.993782	ISAtools(FullAnno)
mouse	mouse_heart_rep2	20M	FullAnno	ISAtools	Spearman	0.981073	ISAtools(FullAnno)
mouse	mouse_heart_rep1	6M	ReduceAnno40	Mandalorion	CCC.est	0.989524	Mandalorion(ReduceAnno40)
mouse	mouse_heart_rep1	6M	ReduceAnno40	Mandalorion	NRMSE	0.0659055	Mandalorion(ReduceAnno40)
mouse	mouse_heart_rep1	6M	ReduceAnno40	Mandalorion	Pearson	0.995061	Mandalorion(ReduceAnno40)
mouse	mouse_heart_rep1	6M	ReduceAnno40	Mandalorion	Spearman	0.988627	Mandalorion(ReduceAnno40)
mouse	mouse_brain_rep1	20M	NoAnno	Mandalorion	CCC.est	0.990673	Mandalorion(NoAnno)
mouse	mouse_brain_rep1	20M	NoAnno	Mandalorion	NRMSE	0.0481378	Mandalorion(NoAnno)
mouse	mouse_brain_rep1	20M	NoAnno	Mandalorion	Pearson	0.995387	Mandalorion(NoAnno)
mouse	mouse_brain_rep1	20M	NoAnno	Mandalorion	Spearman	0.988646	Mandalorion(NoAnno)
mouse	mouse_brain_rep2	20M	NoAnno	Mandalorion	CCC.est	0.991396	Mandalorion(NoAnno)
mouse	mouse_brain_rep2	20M	NoAnno	Mandalorion	NRMSE	0.0462298	Mandalorion(NoAnno)
mouse	mouse_brain_rep2	20M	NoAnno	Mandalorion	Pearson	0.995803	Mandalorion(NoAnno)
mouse	mouse_brain_rep2	20M	NoAnno	Mandalorion	Spearman	0.988767	Mandalorion(NoAnno)
mouse	mouse_heart_rep1	20M	ReduceAnno20	Bambu	CCC.est	0.976279	Bambu(ReduceAnno20)
mouse	mouse_heart_rep1	20M	ReduceAnno20	Bambu	NRMSE	0.0770361	Bambu(ReduceAnno20)
mouse	mouse_heart_rep1	20M	ReduceAnno20	Bambu	Pearson	0.976572	Bambu(ReduceAnno20)
mouse	mouse_heart_rep1	20M	ReduceAnno20	Bambu	Spearman	0.969869	Bambu(ReduceAnno20)
mouse	mouse_brain_rep2	6M	FullAnno	Mandalorion	CCC.est	0.989024	Mandalorion(FullAnno)
mouse	mouse_brain_rep2	6M	FullAnno	Mandalorion	NRMSE	0.0664865	Mandalorion(FullAnno)
mouse	mouse_brain_rep2	6M	FullAnno	Mandalorion	Pearson	0.994764	Mandalorion(FullAnno)
mouse	mouse_brain_rep2	6M	FullAnno	Mandalorion	Spearman	0.988866	Mandalorion(FullAnno)
mouse	mouse_brain_rep1	3M	NoAnno	ISAtools	CCC.est	0.993592	ISAtools(NoAnno)
mouse	mouse_brain_rep1	3M	NoAnno	ISAtools	NRMSE	0.0598152	ISAtools(NoAnno)
mouse	mouse_brain_rep1	3M	NoAnno	ISAtools	Pearson	0.993786	ISAtools(NoAnno)
mouse	mouse_brain_rep1	3M	NoAnno	ISAtools	Spearman	0.992372	ISAtools(NoAnno)
mouse	mouse_brain_rep1	3M	ReduceAnno40	IsoQuant	CCC.est	0.992754	IsoQuant(ReduceAnno40)
mouse	mouse_brain_rep1	3M	ReduceAnno40	IsoQuant	NRMSE	0.0660936	IsoQuant(ReduceAnno40)
mouse	mouse_brain_rep1	3M	ReduceAnno40	IsoQuant	Pearson	0.992767	IsoQuant(ReduceAnno40)
mouse	mouse_brain_rep1	3M	ReduceAnno40	IsoQuant	Spearman	0.991672	IsoQuant(ReduceAnno40)
mouse	mouse_brain_rep1	6M	ReduceAnno40	Mandalorion	CCC.est	0.988578	Mandalorion(ReduceAnno40)
mouse	mouse_brain_rep1	6M	ReduceAnno40	Mandalorion	NRMSE	0.0669925	Mandalorion(ReduceAnno40)
mouse	mouse_brain_rep1	6M	ReduceAnno40	Mandalorion	Pearson	0.994749	Mandalorion(ReduceAnno40)
mouse	mouse_brain_rep1	6M	ReduceAnno40	Mandalorion	Spearman	0.988906	Mandalorion(ReduceAnno40)
mouse	mouse_brain_rep2	3M	FullAnno	Mandalorion	CCC.est	0.985018	Mandalorion(FullAnno)
mouse	mouse_brain_rep2	3M	FullAnno	Mandalorion	NRMSE	0.0698121	Mandalorion(FullAnno)
mouse	mouse_brain_rep2	3M	FullAnno	Mandalorion	Pearson	0.993144	Mandalorion(FullAnno)
mouse	mouse_brain_rep2	3M	FullAnno	Mandalorion	Spearman	0.988996	Mandalorion(FullAnno)
mouse	mouse_heart_rep2	6M	NoAnno	IsoQuant	CCC.est	0.993524	IsoQuant(NoAnno)
mouse	mouse_heart_rep2	6M	NoAnno	IsoQuant	NRMSE	0.0514428	IsoQuant(NoAnno)
mouse	mouse_heart_rep2	6M	NoAnno	IsoQuant	Pearson	0.993551	IsoQuant(NoAnno)
mouse	mouse_heart_rep2	6M	NoAnno	IsoQuant	Spearman	0.99194	IsoQuant(NoAnno)
mouse	mouse_brain_rep2	6M	ReduceAnno20	Mandalorion	CCC.est	0.989086	Mandalorion(ReduceAnno20)
mouse	mouse_brain_rep2	6M	ReduceAnno20	Mandalorion	NRMSE	0.0661628	Mandalorion(ReduceAnno20)
mouse	mouse_brain_rep2	6M	ReduceAnno20	Mandalorion	Pearson	0.994765	Mandalorion(ReduceAnno20)
mouse	mouse_brain_rep2	6M	ReduceAnno20	Mandalorion	Spearman	0.989036	Mandalorion(ReduceAnno20)
mouse	mouse_brain_rep1	3M	NoAnno	Mandalorion	CCC.est	0.984828	Mandalorion(NoAnno)
mouse	mouse_brain_rep1	3M	NoAnno	Mandalorion	NRMSE	0.0692199	Mandalorion(NoAnno)
mouse	mouse_brain_rep1	3M	NoAnno	Mandalorion	Pearson	0.993263	Mandalorion(NoAnno)
mouse	mouse_brain_rep1	3M	NoAnno	Mandalorion	Spearman	0.98906	Mandalorion(NoAnno)
mouse	mouse_brain_rep2	12M	NoAnno	Mandalorion	CCC.est	0.990312	Mandalorion(NoAnno)
mouse	mouse_brain_rep2	12M	NoAnno	Mandalorion	NRMSE	0.0546007	Mandalorion(NoAnno)
mouse	mouse_brain_rep2	12M	NoAnno	Mandalorion	Pearson	0.995573	Mandalorion(NoAnno)
mouse	mouse_brain_rep2	12M	NoAnno	Mandalorion	Spearman	0.989116	Mandalorion(NoAnno)
mouse	mouse_heart_rep2	12M	FullAnno	ISAtools	CCC.est	0.992821	ISAtools(FullAnno)
mouse	mouse_heart_rep2	12M	FullAnno	ISAtools	NRMSE	0.0470763	ISAtools(FullAnno)
mouse	mouse_heart_rep2	12M	FullAnno	ISAtools	Pearson	0.993791	ISAtools(FullAnno)
mouse	mouse_heart_rep2	12M	FullAnno	ISAtools	Spearman	0.981984	ISAtools(FullAnno)
mouse	mouse_heart_rep1	3M	NoAnno	ISAtools	CCC.est	0.993647	ISAtools(NoAnno)
mouse	mouse_heart_rep1	3M	NoAnno	ISAtools	NRMSE	0.0586283	ISAtools(NoAnno)
mouse	mouse_heart_rep1	3M	NoAnno	ISAtools	Pearson	0.993956	ISAtools(NoAnno)
mouse	mouse_heart_rep1	3M	NoAnno	ISAtools	Spearman	0.986483	ISAtools(NoAnno)
mouse	mouse_heart_rep2	12M	ReduceAnno40	Bambu	CCC.est	0.979466	Bambu(ReduceAnno40)
mouse	mouse_heart_rep2	12M	ReduceAnno40	Bambu	NRMSE	0.0784878	Bambu(ReduceAnno40)
mouse	mouse_heart_rep2	12M	ReduceAnno40	Bambu	Pearson	0.979797	Bambu(ReduceAnno40)
mouse	mouse_heart_rep2	12M	ReduceAnno40	Bambu	Spearman	0.97406	Bambu(ReduceAnno40)
human	human_brain_rep1	3M	FullAnno	IsoQuant	CCC.est	0.993924	IsoQuant(FullAnno)
human	human_brain_rep1	3M	FullAnno	IsoQuant	NRMSE	0.0785485	IsoQuant(FullAnno)
human	human_brain_rep1	3M	FullAnno	IsoQuant	Pearson	0.993955	IsoQuant(FullAnno)
human	human_brain_rep1	3M	FullAnno	IsoQuant	Spearman	0.992003	IsoQuant(FullAnno)
mouse	mouse_brain_rep2	3M	ReduceAnno20	Mandalorion	CCC.est	0.985068	Mandalorion(ReduceAnno20)
mouse	mouse_brain_rep2	3M	ReduceAnno20	Mandalorion	NRMSE	0.0695636	Mandalorion(ReduceAnno20)
mouse	mouse_brain_rep2	3M	ReduceAnno20	Mandalorion	Pearson	0.993167	Mandalorion(ReduceAnno20)
mouse	mouse_brain_rep2	3M	ReduceAnno20	Mandalorion	Spearman	0.989187	Mandalorion(ReduceAnno20)
mouse	mouse_heart_rep2	3M	NoAnno	ISAtools	CCC.est	0.993732	ISAtools(NoAnno)
mouse	mouse_heart_rep2	3M	NoAnno	ISAtools	NRMSE	0.0583702	ISAtools(NoAnno)
mouse	mouse_heart_rep2	3M	NoAnno	ISAtools	Pearson	0.994033	ISAtools(NoAnno)
mouse	mouse_heart_rep2	3M	NoAnno	ISAtools	Spearman	0.986517	ISAtools(NoAnno)
mouse	mouse_heart_rep2	6M	NoAnno	Mandalorion	CCC.est	0.990054	Mandalorion(NoAnno)
mouse	mouse_heart_rep2	6M	NoAnno	Mandalorion	NRMSE	0.0638298	Mandalorion(NoAnno)
mouse	mouse_heart_rep2	6M	NoAnno	Mandalorion	Pearson	0.995255	Mandalorion(NoAnno)
mouse	mouse_heart_rep2	6M	NoAnno	Mandalorion	Spearman	0.989472	Mandalorion(NoAnno)
human	human_brain_rep1	3M	FullAnno	ISAtools	CCC.est	0.99371	ISAtools(FullAnno)
human	human_brain_rep1	3M	FullAnno	ISAtools	NRMSE	0.0774424	ISAtools(FullAnno)
human	human_brain_rep1	3M	FullAnno	ISAtools	Pearson	0.99419	ISAtools(FullAnno)
human	human_brain_rep1	3M	FullAnno	ISAtools	Spearman	0.988854	ISAtools(FullAnno)
mouse	mouse_brain_rep2	12M	ReduceAnno20	Bambu	CCC.est	0.979533	Bambu(ReduceAnno20)
mouse	mouse_brain_rep2	12M	ReduceAnno20	Bambu	NRMSE	0.0796794	Bambu(ReduceAnno20)
mouse	mouse_brain_rep2	12M	ReduceAnno20	Bambu	Pearson	0.979793	Bambu(ReduceAnno20)
mouse	mouse_brain_rep2	12M	ReduceAnno20	Bambu	Spearman	0.975041	Bambu(ReduceAnno20)
human	human_heart_rep2	3M	NoAnno	IsoQuant	CCC.est	0.993159	IsoQuant(NoAnno)
human	human_heart_rep2	3M	NoAnno	IsoQuant	NRMSE	0.0661149	IsoQuant(NoAnno)
human	human_heart_rep2	3M	NoAnno	IsoQuant	Pearson	0.99316	IsoQuant(NoAnno)
human	human_heart_rep2	3M	NoAnno	IsoQuant	Spearman	0.992161	IsoQuant(NoAnno)
mouse	mouse_heart_rep1	3M	FullAnno	ISAtools	CCC.est	0.993407	ISAtools(FullAnno)
mouse	mouse_heart_rep1	3M	FullAnno	ISAtools	NRMSE	0.061372	ISAtools(FullAnno)
mouse	mouse_heart_rep1	3M	FullAnno	ISAtools	Pearson	0.994199	ISAtools(FullAnno)
mouse	mouse_heart_rep1	3M	FullAnno	ISAtools	Spearman	0.985673	ISAtools(FullAnno)
human	human_heart_rep2	3M	FullAnno	Bambu	CCC.est	0.991062	Bambu(FullAnno)
human	human_heart_rep2	3M	FullAnno	Bambu	NRMSE	0.079769	Bambu(FullAnno)
human	human_heart_rep2	3M	FullAnno	Bambu	Pearson	0.991107	Bambu(FullAnno)
human	human_heart_rep2	3M	FullAnno	Bambu	Spearman	0.983896	Bambu(FullAnno)
mouse	mouse_brain_rep2	3M	ReduceAnno40	Mandalorion	CCC.est	0.985467	Mandalorion(ReduceAnno40)
mouse	mouse_brain_rep2	3M	ReduceAnno40	Mandalorion	NRMSE	0.0684583	Mandalorion(ReduceAnno40)
mouse	mouse_brain_rep2	3M	ReduceAnno40	Mandalorion	Pearson	0.993415	Mandalorion(ReduceAnno40)
mouse	mouse_brain_rep2	3M	ReduceAnno40	Mandalorion	Spearman	0.989489	Mandalorion(ReduceAnno40)
mouse	mouse_heart_rep2	12M	ReduceAnno20	Bambu	CCC.est	0.979119	Bambu(ReduceAnno20)
mouse	mouse_heart_rep2	12M	ReduceAnno20	Bambu	NRMSE	0.080052	Bambu(ReduceAnno20)
mouse	mouse_heart_rep2	12M	ReduceAnno20	Bambu	Pearson	0.979413	Bambu(ReduceAnno20)
mouse	mouse_heart_rep2	12M	ReduceAnno20	Bambu	Spearman	0.97162	Bambu(ReduceAnno20)
mouse	mouse_brain_rep1	12M	ReduceAnno20	Bambu	CCC.est	0.978898	Bambu(ReduceAnno20)
mouse	mouse_brain_rep1	12M	ReduceAnno20	Bambu	NRMSE	0.0801301	Bambu(ReduceAnno20)
mouse	mouse_brain_rep1	12M	ReduceAnno20	Bambu	Pearson	0.979206	Bambu(ReduceAnno20)
mouse	mouse_brain_rep1	12M	ReduceAnno20	Bambu	Spearman	0.974195	Bambu(ReduceAnno20)
mouse	mouse_heart_rep1	6M	NoAnno	Mandalorion	CCC.est	0.989954	Mandalorion(NoAnno)
mouse	mouse_heart_rep1	6M	NoAnno	Mandalorion	NRMSE	0.0640836	Mandalorion(NoAnno)
mouse	mouse_heart_rep1	6M	NoAnno	Mandalorion	Pearson	0.99522	Mandalorion(NoAnno)
mouse	mouse_heart_rep1	6M	NoAnno	Mandalorion	Spearman	0.98953	Mandalorion(NoAnno)
mouse	mouse_brain_rep2	6M	ReduceAnno40	Mandalorion	CCC.est	0.989473	Mandalorion(ReduceAnno40)
mouse	mouse_brain_rep2	6M	ReduceAnno40	Mandalorion	NRMSE	0.0648347	Mandalorion(ReduceAnno40)
mouse	mouse_brain_rep2	6M	ReduceAnno40	Mandalorion	Pearson	0.995029	Mandalorion(ReduceAnno40)
mouse	mouse_brain_rep2	6M	ReduceAnno40	Mandalorion	Spearman	0.989572	Mandalorion(ReduceAnno40)
mouse	mouse_brain_rep1	6M	NoAnno	Mandalorion	CCC.est	0.989055	Mandalorion(NoAnno)
mouse	mouse_brain_rep1	6M	NoAnno	Mandalorion	NRMSE	0.0650739	Mandalorion(NoAnno)
mouse	mouse_brain_rep1	6M	NoAnno	Mandalorion	Pearson	0.99495	Mandalorion(NoAnno)
mouse	mouse_brain_rep1	6M	NoAnno	Mandalorion	Spearman	0.989847	Mandalorion(NoAnno)
mouse	mouse_heart_rep1	3M	FullAnno	Mandalorion	CCC.est	0.98846	Mandalorion(FullAnno)
mouse	mouse_heart_rep1	3M	FullAnno	Mandalorion	NRMSE	0.0704084	Mandalorion(FullAnno)
mouse	mouse_heart_rep1	3M	FullAnno	Mandalorion	Pearson	0.99351	Mandalorion(FullAnno)
mouse	mouse_heart_rep1	3M	FullAnno	Mandalorion	Spearman	0.990324	Mandalorion(FullAnno)
mouse	mouse_brain_rep2	3M	NoAnno	Mandalorion	CCC.est	0.986248	Mandalorion(NoAnno)
mouse	mouse_brain_rep2	3M	NoAnno	Mandalorion	NRMSE	0.0661474	Mandalorion(NoAnno)
mouse	mouse_brain_rep2	3M	NoAnno	Mandalorion	Pearson	0.993824	Mandalorion(NoAnno)
mouse	mouse_brain_rep2	3M	NoAnno	Mandalorion	Spearman	0.990413	Mandalorion(NoAnno)
human	human_heart_rep2	20M	ReduceAnno40	Bambu	CCC.est	0.977468	Bambu(ReduceAnno40)
human	human_heart_rep2	20M	ReduceAnno40	Bambu	NRMSE	0.0809629	Bambu(ReduceAnno40)
human	human_heart_rep2	20M	ReduceAnno40	Bambu	Pearson	0.977727	Bambu(ReduceAnno40)
human	human_heart_rep2	20M	ReduceAnno40	Bambu	Spearman	0.971393	Bambu(ReduceAnno40)
mouse	mouse_heart_rep2	3M	FullAnno	Mandalorion	CCC.est	0.988681	Mandalorion(FullAnno)
mouse	mouse_heart_rep2	3M	FullAnno	Mandalorion	NRMSE	0.0697007	Mandalorion(FullAnno)
mouse	mouse_heart_rep2	3M	FullAnno	Mandalorion	Pearson	0.993618	Mandalorion(FullAnno)
mouse	mouse_heart_rep2	3M	FullAnno	Mandalorion	Spearman	0.990477	Mandalorion(FullAnno)
mouse	mouse_heart_rep1	12M	ReduceAnno40	Bambu	CCC.est	0.977893	Bambu(ReduceAnno40)
mouse	mouse_heart_rep1	12M	ReduceAnno40	Bambu	NRMSE	0.0812416	Bambu(ReduceAnno40)
mouse	mouse_heart_rep1	12M	ReduceAnno40	Bambu	Pearson	0.978266	Bambu(ReduceAnno40)
mouse	mouse_heart_rep1	12M	ReduceAnno40	Bambu	Spearman	0.973725	Bambu(ReduceAnno40)
mouse	mouse_brain_rep1	6M	ReduceAnno40	Bambu	CCC.est	0.983509	Bambu(ReduceAnno40)
mouse	mouse_brain_rep1	6M	ReduceAnno40	Bambu	NRMSE	0.0813163	Bambu(ReduceAnno40)
mouse	mouse_brain_rep1	6M	ReduceAnno40	Bambu	Pearson	0.98377	Bambu(ReduceAnno40)
mouse	mouse_brain_rep1	6M	ReduceAnno40	Bambu	Spearman	0.979954	Bambu(ReduceAnno40)
human	human_brain_rep2	20M	ReduceAnno40	Bambu	CCC.est	0.974346	Bambu(ReduceAnno40)
human	human_brain_rep2	20M	ReduceAnno40	Bambu	NRMSE	0.0814276	Bambu(ReduceAnno40)
human	human_brain_rep2	20M	ReduceAnno40	Bambu	Pearson	0.974737	Bambu(ReduceAnno40)
human	human_brain_rep2	20M	ReduceAnno40	Bambu	Spearman	0.967962	Bambu(ReduceAnno40)
mouse	mouse_heart_rep2	3M	FullAnno	ISAtools	CCC.est	0.993416	ISAtools(FullAnno)
mouse	mouse_heart_rep2	3M	FullAnno	ISAtools	NRMSE	0.0614183	ISAtools(FullAnno)
mouse	mouse_heart_rep2	3M	FullAnno	ISAtools	Pearson	0.994201	ISAtools(FullAnno)
mouse	mouse_heart_rep2	3M	FullAnno	ISAtools	Spearman	0.984846	ISAtools(FullAnno)
human	human_brain_rep1	3M	FullAnno	Bambu	CCC.est	0.993603	Bambu(FullAnno)
human	human_brain_rep1	3M	FullAnno	Bambu	NRMSE	0.082314	Bambu(FullAnno)
human	human_brain_rep1	3M	FullAnno	Bambu	Pearson	0.99361	Bambu(FullAnno)
human	human_brain_rep1	3M	FullAnno	Bambu	Spearman	0.988759	Bambu(FullAnno)
mouse	mouse_heart_rep1	6M	FullAnno	ISAtools	CCC.est	0.993446	ISAtools(FullAnno)
mouse	mouse_heart_rep1	6M	FullAnno	ISAtools	NRMSE	0.0535522	ISAtools(FullAnno)
mouse	mouse_heart_rep1	6M	FullAnno	ISAtools	Pearson	0.994298	ISAtools(FullAnno)
mouse	mouse_heart_rep1	6M	FullAnno	ISAtools	Spearman	0.985701	ISAtools(FullAnno)
mouse	mouse_brain_rep2	6M	NoAnno	Mandalorion	CCC.est	0.989941	Mandalorion(NoAnno)
mouse	mouse_brain_rep2	6M	NoAnno	Mandalorion	NRMSE	0.0628043	Mandalorion(NoAnno)
mouse	mouse_brain_rep2	6M	NoAnno	Mandalorion	Pearson	0.99522	Mandalorion(NoAnno)
mouse	mouse_brain_rep2	6M	NoAnno	Mandalorion	Spearman	0.990501	Mandalorion(NoAnno)
human	human_brain_rep2	3M	NoAnno	IsoQuant	CCC.est	0.99267	IsoQuant(NoAnno)
human	human_brain_rep2	3M	NoAnno	IsoQuant	NRMSE	0.0664302	IsoQuant(NoAnno)
human	human_brain_rep2	3M	NoAnno	IsoQuant	Pearson	0.992671	IsoQuant(NoAnno)
human	human_brain_rep2	3M	NoAnno	IsoQuant	Spearman	0.992241	IsoQuant(NoAnno)
mouse	mouse_heart_rep2	3M	ReduceAnno20	Mandalorion	CCC.est	0.988679	Mandalorion(ReduceAnno20)
mouse	mouse_heart_rep2	3M	ReduceAnno20	Mandalorion	NRMSE	0.0695913	Mandalorion(ReduceAnno20)
mouse	mouse_heart_rep2	3M	ReduceAnno20	Mandalorion	Pearson	0.9936	Mandalorion(ReduceAnno20)
mouse	mouse_heart_rep2	3M	ReduceAnno20	Mandalorion	Spearman	0.990538	Mandalorion(ReduceAnno20)
human	human_heart_rep1	6M	FullAnno	Bambu	CCC.est	0.990456	Bambu(FullAnno)
human	human_heart_rep1	6M	FullAnno	Bambu	NRMSE	0.0830474	Bambu(FullAnno)
human	human_heart_rep1	6M	FullAnno	Bambu	Pearson	0.990502	Bambu(FullAnno)
human	human_heart_rep1	6M	FullAnno	Bambu	Spearman	0.985297	Bambu(FullAnno)
mouse	mouse_heart_rep1	3M	ReduceAnno20	Mandalorion	CCC.est	0.988546	Mandalorion(ReduceAnno20)
mouse	mouse_heart_rep1	3M	ReduceAnno20	Mandalorion	NRMSE	0.0699896	Mandalorion(ReduceAnno20)
mouse	mouse_heart_rep1	3M	ReduceAnno20	Mandalorion	Pearson	0.993574	Mandalorion(ReduceAnno20)
mouse	mouse_heart_rep1	3M	ReduceAnno20	Mandalorion	Spearman	0.990551	Mandalorion(ReduceAnno20)
mouse	mouse_heart_rep1	12M	ReduceAnno20	Bambu	CCC.est	0.977159	Bambu(ReduceAnno20)
mouse	mouse_heart_rep1	12M	ReduceAnno20	Bambu	NRMSE	0.0836542	Bambu(ReduceAnno20)
mouse	mouse_heart_rep1	12M	ReduceAnno20	Bambu	Pearson	0.977462	Bambu(ReduceAnno20)
mouse	mouse_heart_rep1	12M	ReduceAnno20	Bambu	Spearman	0.971085	Bambu(ReduceAnno20)
mouse	mouse_heart_rep1	3M	NoAnno	IsoQuant	CCC.est	0.99388	IsoQuant(NoAnno)
mouse	mouse_heart_rep1	3M	NoAnno	IsoQuant	NRMSE	0.0570186	IsoQuant(NoAnno)
mouse	mouse_heart_rep1	3M	NoAnno	IsoQuant	Pearson	0.993897	IsoQuant(NoAnno)
mouse	mouse_heart_rep1	3M	NoAnno	IsoQuant	Spearman	0.992372	IsoQuant(NoAnno)
mouse	mouse_heart_rep1	3M	ReduceAnno40	Mandalorion	CCC.est	0.988646	Mandalorion(ReduceAnno40)
mouse	mouse_heart_rep1	3M	ReduceAnno40	Mandalorion	NRMSE	0.0695226	Mandalorion(ReduceAnno40)
mouse	mouse_heart_rep1	3M	ReduceAnno40	Mandalorion	Pearson	0.993617	Mandalorion(ReduceAnno40)
mouse	mouse_heart_rep1	3M	ReduceAnno40	Mandalorion	Spearman	0.990731	Mandalorion(ReduceAnno40)
mouse	mouse_heart_rep2	3M	ReduceAnno40	Mandalorion	CCC.est	0.988874	Mandalorion(ReduceAnno40)
mouse	mouse_heart_rep2	3M	ReduceAnno40	Mandalorion	NRMSE	0.0687776	Mandalorion(ReduceAnno40)
mouse	mouse_heart_rep2	3M	ReduceAnno40	Mandalorion	Pearson	0.993727	Mandalorion(ReduceAnno40)
mouse	mouse_heart_rep2	3M	ReduceAnno40	Mandalorion	Spearman	0.990887	Mandalorion(ReduceAnno40)
mouse	mouse_brain_rep2	3M	NoAnno	ISAtools	CCC.est	0.994318	ISAtools(NoAnno)
mouse	mouse_brain_rep2	3M	NoAnno	ISAtools	NRMSE	0.0567434	ISAtools(NoAnno)
mouse	mouse_brain_rep2	3M	NoAnno	ISAtools	Pearson	0.99448	ISAtools(NoAnno)
mouse	mouse_brain_rep2	3M	NoAnno	ISAtools	Spearman	0.993284	ISAtools(NoAnno)
mouse	mouse_heart_rep2	3M	NoAnno	IsoQuant	CCC.est	0.993731	IsoQuant(NoAnno)
mouse	mouse_heart_rep2	3M	NoAnno	IsoQuant	NRMSE	0.0577836	IsoQuant(NoAnno)
mouse	mouse_heart_rep2	3M	NoAnno	IsoQuant	Pearson	0.993745	IsoQuant(NoAnno)
mouse	mouse_heart_rep2	3M	NoAnno	IsoQuant	Spearman	0.992517	IsoQuant(NoAnno)
human	human_heart_rep1	3M	FullAnno	ISAtools	CCC.est	0.994225	ISAtools(FullAnno)
human	human_heart_rep1	3M	FullAnno	ISAtools	NRMSE	0.0746482	ISAtools(FullAnno)
human	human_heart_rep1	3M	FullAnno	ISAtools	Pearson	0.994591	ISAtools(FullAnno)
human	human_heart_rep1	3M	FullAnno	ISAtools	Spearman	0.989815	ISAtools(FullAnno)
mouse	mouse_heart_rep1	3M	NoAnno	Mandalorion	CCC.est	0.989182	Mandalorion(NoAnno)
mouse	mouse_heart_rep1	3M	NoAnno	Mandalorion	NRMSE	0.0674166	Mandalorion(NoAnno)
mouse	mouse_heart_rep1	3M	NoAnno	Mandalorion	Pearson	0.993917	Mandalorion(NoAnno)
mouse	mouse_heart_rep1	3M	NoAnno	Mandalorion	Spearman	0.991367	Mandalorion(NoAnno)
mouse	mouse_heart_rep2	3M	NoAnno	Mandalorion	CCC.est	0.989257	Mandalorion(NoAnno)
mouse	mouse_heart_rep2	3M	NoAnno	Mandalorion	NRMSE	0.067089	Mandalorion(NoAnno)
mouse	mouse_heart_rep2	3M	NoAnno	Mandalorion	Pearson	0.993896	Mandalorion(NoAnno)
mouse	mouse_heart_rep2	3M	NoAnno	Mandalorion	Spearman	0.991471	Mandalorion(NoAnno)
human	human_heart_rep1	6M	NoAnno	IsoQuant	CCC.est	0.992765	IsoQuant(NoAnno)
human	human_heart_rep1	6M	NoAnno	IsoQuant	NRMSE	0.0667349	IsoQuant(NoAnno)
human	human_heart_rep1	6M	NoAnno	IsoQuant	Pearson	0.992769	IsoQuant(NoAnno)
human	human_heart_rep1	6M	NoAnno	IsoQuant	Spearman	0.992637	IsoQuant(NoAnno)
mouse	mouse_brain_rep2	6M	NoAnno	IsoQuant	CCC.est	0.993977	IsoQuant(NoAnno)
mouse	mouse_brain_rep2	6M	NoAnno	IsoQuant	NRMSE	0.0487899	IsoQuant(NoAnno)
mouse	mouse_brain_rep2	6M	NoAnno	IsoQuant	Pearson	0.994006	IsoQuant(NoAnno)
mouse	mouse_brain_rep2	6M	NoAnno	IsoQuant	Spearman	0.992667	IsoQuant(NoAnno)
human	human_brain_rep1	20M	ReduceAnno40	Bambu	CCC.est	0.979376	Bambu(ReduceAnno40)
human	human_brain_rep1	20M	ReduceAnno40	Bambu	NRMSE	0.085493	Bambu(ReduceAnno40)
human	human_brain_rep1	20M	ReduceAnno40	Bambu	Pearson	0.97966	Bambu(ReduceAnno40)
human	human_brain_rep1	20M	ReduceAnno40	Bambu	Spearman	0.973422	Bambu(ReduceAnno40)
human	human_heart_rep2	20M	ReduceAnno20	Bambu	CCC.est	0.974466	Bambu(ReduceAnno20)
human	human_heart_rep2	20M	ReduceAnno20	Bambu	NRMSE	0.0864796	Bambu(ReduceAnno20)
human	human_heart_rep2	20M	ReduceAnno20	Bambu	Pearson	0.974825	Bambu(ReduceAnno20)
human	human_heart_rep2	20M	ReduceAnno20	Bambu	Spearman	0.966295	Bambu(ReduceAnno20)
mouse	mouse_brain_rep2	6M	ReduceAnno40	Bambu	CCC.est	0.98159	Bambu(ReduceAnno40)
mouse	mouse_brain_rep2	6M	ReduceAnno40	Bambu	NRMSE	0.0867038	Bambu(ReduceAnno40)
mouse	mouse_brain_rep2	6M	ReduceAnno40	Bambu	Pearson	0.981913	Bambu(ReduceAnno40)
mouse	mouse_brain_rep2	6M	ReduceAnno40	Bambu	Spearman	0.979417	Bambu(ReduceAnno40)
human	human_brain_rep1	6M	NoAnno	IsoQuant	CCC.est	0.993024	IsoQuant(NoAnno)
human	human_brain_rep1	6M	NoAnno	IsoQuant	NRMSE	0.066349	IsoQuant(NoAnno)
human	human_brain_rep1	6M	NoAnno	IsoQuant	Pearson	0.993027	IsoQuant(NoAnno)
human	human_brain_rep1	6M	NoAnno	IsoQuant	Spearman	0.99269	IsoQuant(NoAnno)
human	human_brain_rep2	20M	ReduceAnno20	Bambu	CCC.est	0.970586	Bambu(ReduceAnno20)
human	human_brain_rep2	20M	ReduceAnno20	Bambu	NRMSE	0.0874832	Bambu(ReduceAnno20)
human	human_brain_rep2	20M	ReduceAnno20	Bambu	Pearson	0.971057	Bambu(ReduceAnno20)
human	human_brain_rep2	20M	ReduceAnno20	Bambu	Spearman	0.961881	Bambu(ReduceAnno20)
human	human_brain_rep2	12M	ReduceAnno40	Bambu	CCC.est	0.975639	Bambu(ReduceAnno40)
human	human_brain_rep2	12M	ReduceAnno40	Bambu	NRMSE	0.0884664	Bambu(ReduceAnno40)
human	human_brain_rep2	12M	ReduceAnno40	Bambu	Pearson	0.97605	Bambu(ReduceAnno40)
human	human_brain_rep2	12M	ReduceAnno40	Bambu	Spearman	0.969708	Bambu(ReduceAnno40)
mouse	mouse_brain_rep2	6M	ReduceAnno20	Bambu	CCC.est	0.981184	Bambu(ReduceAnno20)
mouse	mouse_brain_rep2	6M	ReduceAnno20	Bambu	NRMSE	0.0890912	Bambu(ReduceAnno20)
mouse	mouse_brain_rep2	6M	ReduceAnno20	Bambu	Pearson	0.981452	Bambu(ReduceAnno20)
mouse	mouse_brain_rep2	6M	ReduceAnno20	Bambu	Spearman	0.977358	Bambu(ReduceAnno20)
mouse	mouse_brain_rep1	6M	NoAnno	IsoQuant	CCC.est	0.994433	IsoQuant(NoAnno)
mouse	mouse_brain_rep1	6M	NoAnno	IsoQuant	NRMSE	0.0466212	IsoQuant(NoAnno)
mouse	mouse_brain_rep1	6M	NoAnno	IsoQuant	Pearson	0.994468	IsoQuant(NoAnno)
mouse	mouse_brain_rep1	6M	NoAnno	IsoQuant	Spearman	0.993018	IsoQuant(NoAnno)
human	human_heart_rep2	12M	ReduceAnno40	Bambu	CCC.est	0.97826	Bambu(ReduceAnno40)
human	human_heart_rep2	12M	ReduceAnno40	Bambu	NRMSE	0.0894904	Bambu(ReduceAnno40)
human	human_heart_rep2	12M	ReduceAnno40	Bambu	Pearson	0.978515	Bambu(ReduceAnno40)
human	human_heart_rep2	12M	ReduceAnno40	Bambu	Spearman	0.973059	Bambu(ReduceAnno40)
mouse	mouse_heart_rep2	6M	ReduceAnno40	Bambu	CCC.est	0.980914	Bambu(ReduceAnno40)
mouse	mouse_heart_rep2	6M	ReduceAnno40	Bambu	NRMSE	0.0898523	Bambu(ReduceAnno40)
mouse	mouse_heart_rep2	6M	ReduceAnno40	Bambu	Pearson	0.981227	Bambu(ReduceAnno40)
mouse	mouse_heart_rep2	6M	ReduceAnno40	Bambu	Spearman	0.977236	Bambu(ReduceAnno40)
mouse	mouse_brain_rep2	3M	NoAnno	IsoQuant	CCC.est	0.994673	IsoQuant(NoAnno)
mouse	mouse_brain_rep2	3M	NoAnno	IsoQuant	NRMSE	0.0540752	IsoQuant(NoAnno)
mouse	mouse_brain_rep2	3M	NoAnno	IsoQuant	Pearson	0.994677	IsoQuant(NoAnno)
mouse	mouse_brain_rep2	3M	NoAnno	IsoQuant	Spearman	0.995034	IsoQuant(NoAnno)
mouse	mouse_brain_rep1	6M	ReduceAnno20	Bambu	CCC.est	0.980302	Bambu(ReduceAnno20)
mouse	mouse_brain_rep1	6M	ReduceAnno20	Bambu	NRMSE	0.0903588	Bambu(ReduceAnno20)
mouse	mouse_brain_rep1	6M	ReduceAnno20	Bambu	Pearson	0.980617	Bambu(ReduceAnno20)
mouse	mouse_brain_rep1	6M	ReduceAnno20	Bambu	Spearman	0.976459	Bambu(ReduceAnno20)
human	human_heart_rep1	3M	FullAnno	Bambu	CCC.est	0.992215	Bambu(FullAnno)
human	human_heart_rep1	3M	FullAnno	Bambu	NRMSE	0.0912419	Bambu(FullAnno)
human	human_heart_rep1	3M	FullAnno	Bambu	Pearson	0.992222	Bambu(FullAnno)
human	human_heart_rep1	3M	FullAnno	Bambu	Spearman	0.987759	Bambu(FullAnno)
mouse	mouse_heart_rep2	6M	ReduceAnno20	Bambu	CCC.est	0.980352	Bambu(ReduceAnno20)
mouse	mouse_heart_rep2	6M	ReduceAnno20	Bambu	NRMSE	0.0924738	Bambu(ReduceAnno20)
mouse	mouse_heart_rep2	6M	ReduceAnno20	Bambu	Pearson	0.98064	Bambu(ReduceAnno20)
mouse	mouse_heart_rep2	6M	ReduceAnno20	Bambu	Spearman	0.974867	Bambu(ReduceAnno20)
human	human_brain_rep1	12M	ReduceAnno40	Bambu	CCC.est	0.980559	Bambu(ReduceAnno40)
human	human_brain_rep1	12M	ReduceAnno40	Bambu	NRMSE	0.0929971	Bambu(ReduceAnno40)
human	human_brain_rep1	12M	ReduceAnno40	Bambu	Pearson	0.980864	Bambu(ReduceAnno40)
human	human_brain_rep1	12M	ReduceAnno40	Bambu	Spearman	0.974701	Bambu(ReduceAnno40)
human	human_brain_rep1	20M	ReduceAnno20	Bambu	CCC.est	0.975767	Bambu(ReduceAnno20)
human	human_brain_rep1	20M	ReduceAnno20	Bambu	NRMSE	0.0930231	Bambu(ReduceAnno20)
human	human_brain_rep1	20M	ReduceAnno20	Bambu	Pearson	0.976132	Bambu(ReduceAnno20)
human	human_brain_rep1	20M	ReduceAnno20	Bambu	Spearman	0.968584	Bambu(ReduceAnno20)
mouse	mouse_heart_rep1	6M	ReduceAnno40	Bambu	CCC.est	0.979105	Bambu(ReduceAnno40)
mouse	mouse_heart_rep1	6M	ReduceAnno40	Bambu	NRMSE	0.0936983	Bambu(ReduceAnno40)
mouse	mouse_heart_rep1	6M	ReduceAnno40	Bambu	Pearson	0.979463	Bambu(ReduceAnno40)
mouse	mouse_heart_rep1	6M	ReduceAnno40	Bambu	Spearman	0.976255	Bambu(ReduceAnno40)
human	human_heart_rep1	20M	ReduceAnno40	Bambu	CCC.est	0.976115	Bambu(ReduceAnno40)
human	human_heart_rep1	20M	ReduceAnno40	Bambu	NRMSE	0.0946233	Bambu(ReduceAnno40)
human	human_heart_rep1	20M	ReduceAnno40	Bambu	Pearson	0.976396	Bambu(ReduceAnno40)
human	human_heart_rep1	20M	ReduceAnno40	Bambu	Spearman	0.971949	Bambu(ReduceAnno40)
human	human_brain_rep2	12M	ReduceAnno20	Bambu	CCC.est	0.972317	Bambu(ReduceAnno20)
human	human_brain_rep2	12M	ReduceAnno20	Bambu	NRMSE	0.0947013	Bambu(ReduceAnno20)
human	human_brain_rep2	12M	ReduceAnno20	Bambu	Pearson	0.972773	Bambu(ReduceAnno20)
human	human_brain_rep2	12M	ReduceAnno20	Bambu	Spearman	0.963896	Bambu(ReduceAnno20)
mouse	mouse_brain_rep1	3M	NoAnno	IsoQuant	CCC.est	0.995117	IsoQuant(NoAnno)
mouse	mouse_brain_rep1	3M	NoAnno	IsoQuant	NRMSE	0.0514684	IsoQuant(NoAnno)
mouse	mouse_brain_rep1	3M	NoAnno	IsoQuant	Pearson	0.995122	IsoQuant(NoAnno)
mouse	mouse_brain_rep1	3M	NoAnno	IsoQuant	Spearman	0.995471	IsoQuant(NoAnno)
mouse	mouse_heart_rep1	6M	ReduceAnno20	Bambu	CCC.est	0.978928	Bambu(ReduceAnno20)
mouse	mouse_heart_rep1	6M	ReduceAnno20	Bambu	NRMSE	0.0956716	Bambu(ReduceAnno20)
mouse	mouse_heart_rep1	6M	ReduceAnno20	Bambu	Pearson	0.979234	Bambu(ReduceAnno20)
mouse	mouse_heart_rep1	6M	ReduceAnno20	Bambu	Spearman	0.974077	Bambu(ReduceAnno20)
human	human_heart_rep2	12M	ReduceAnno20	Bambu	CCC.est	0.975085	Bambu(ReduceAnno20)
human	human_heart_rep2	12M	ReduceAnno20	Bambu	NRMSE	0.0964176	Bambu(ReduceAnno20)
human	human_heart_rep2	12M	ReduceAnno20	Bambu	Pearson	0.975413	Bambu(ReduceAnno20)
human	human_heart_rep2	12M	ReduceAnno20	Bambu	Spearman	0.968183	Bambu(ReduceAnno20)
mouse	mouse_brain_rep1	3M	ReduceAnno40	Bambu	CCC.est	0.984472	Bambu(ReduceAnno40)
mouse	mouse_brain_rep1	3M	ReduceAnno40	Bambu	NRMSE	0.0965573	Bambu(ReduceAnno40)
mouse	mouse_brain_rep1	3M	ReduceAnno40	Bambu	Pearson	0.984729	Bambu(ReduceAnno40)
mouse	mouse_brain_rep1	3M	ReduceAnno40	Bambu	Spearman	0.982323	Bambu(ReduceAnno40)
human	human_heart_rep2	6M	ReduceAnno40	Bambu	CCC.est	0.97955	Bambu(ReduceAnno40)
human	human_heart_rep2	6M	ReduceAnno40	Bambu	NRMSE	0.10015	Bambu(ReduceAnno40)
human	human_heart_rep2	6M	ReduceAnno40	Bambu	Pearson	0.979815	Bambu(ReduceAnno40)
human	human_heart_rep2	6M	ReduceAnno40	Bambu	Spearman	0.973227	Bambu(ReduceAnno40)
human	human_brain_rep1	12M	ReduceAnno20	Bambu	CCC.est	0.977412	Bambu(ReduceAnno20)
human	human_brain_rep1	12M	ReduceAnno20	Bambu	NRMSE	0.100806	Bambu(ReduceAnno20)
human	human_brain_rep1	12M	ReduceAnno20	Bambu	Pearson	0.977789	Bambu(ReduceAnno20)
human	human_brain_rep1	12M	ReduceAnno20	Bambu	Spearman	0.97018	Bambu(ReduceAnno20)
human	human_heart_rep1	20M	ReduceAnno20	Bambu	CCC.est	0.972426	Bambu(ReduceAnno20)
human	human_heart_rep1	20M	ReduceAnno20	Bambu	NRMSE	0.10196	Bambu(ReduceAnno20)
human	human_heart_rep1	20M	ReduceAnno20	Bambu	Pearson	0.972822	Bambu(ReduceAnno20)
human	human_heart_rep1	20M	ReduceAnno20	Bambu	Spearman	0.96674	Bambu(ReduceAnno20)
human	human_brain_rep2	6M	ReduceAnno40	Bambu	CCC.est	0.976821	Bambu(ReduceAnno40)
human	human_brain_rep2	6M	ReduceAnno40	Bambu	NRMSE	0.102403	Bambu(ReduceAnno40)
human	human_brain_rep2	6M	ReduceAnno40	Bambu	Pearson	0.977201	Bambu(ReduceAnno40)
human	human_brain_rep2	6M	ReduceAnno40	Bambu	Spearman	0.972491	Bambu(ReduceAnno40)
mouse	mouse_brain_rep2	3M	ReduceAnno40	Bambu	CCC.est	0.982113	Bambu(ReduceAnno40)
mouse	mouse_brain_rep2	3M	ReduceAnno40	Bambu	NRMSE	0.104624	Bambu(ReduceAnno40)
mouse	mouse_brain_rep2	3M	ReduceAnno40	Bambu	Pearson	0.982422	Bambu(ReduceAnno40)
mouse	mouse_brain_rep2	3M	ReduceAnno40	Bambu	Spearman	0.980994	Bambu(ReduceAnno40)
human	human_heart_rep1	12M	ReduceAnno40	Bambu	CCC.est	0.976396	Bambu(ReduceAnno40)
human	human_heart_rep1	12M	ReduceAnno40	Bambu	NRMSE	0.104956	Bambu(ReduceAnno40)
human	human_heart_rep1	12M	ReduceAnno40	Bambu	Pearson	0.976688	Bambu(ReduceAnno40)
human	human_heart_rep1	12M	ReduceAnno40	Bambu	Spearman	0.972306	Bambu(ReduceAnno40)
mouse	mouse_heart_rep2	3M	ReduceAnno40	Bambu	CCC.est	0.979957	Bambu(ReduceAnno40)
mouse	mouse_heart_rep2	3M	ReduceAnno40	Bambu	NRMSE	0.105171	Bambu(ReduceAnno40)
mouse	mouse_heart_rep2	3M	ReduceAnno40	Bambu	Pearson	0.98032	Bambu(ReduceAnno40)
mouse	mouse_heart_rep2	3M	ReduceAnno40	Bambu	Spearman	0.975944	Bambu(ReduceAnno40)
mouse	mouse_brain_rep2	3M	ReduceAnno20	Bambu	CCC.est	0.982397	Bambu(ReduceAnno20)
mouse	mouse_brain_rep2	3M	ReduceAnno20	Bambu	NRMSE	0.106395	Bambu(ReduceAnno20)
mouse	mouse_brain_rep2	3M	ReduceAnno20	Bambu	Pearson	0.98266	Bambu(ReduceAnno20)
mouse	mouse_brain_rep2	3M	ReduceAnno20	Bambu	Spearman	0.979918	Bambu(ReduceAnno20)
mouse	mouse_heart_rep2	3M	ReduceAnno20	Bambu	CCC.est	0.980098	Bambu(ReduceAnno20)
mouse	mouse_heart_rep2	3M	ReduceAnno20	Bambu	NRMSE	0.106612	Bambu(ReduceAnno20)
mouse	mouse_heart_rep2	3M	ReduceAnno20	Bambu	Pearson	0.980412	Bambu(ReduceAnno20)
mouse	mouse_heart_rep2	3M	ReduceAnno20	Bambu	Spearman	0.973761	Bambu(ReduceAnno20)
mouse	mouse_brain_rep1	3M	ReduceAnno20	Bambu	CCC.est	0.981969	Bambu(ReduceAnno20)
mouse	mouse_brain_rep1	3M	ReduceAnno20	Bambu	NRMSE	0.106628	Bambu(ReduceAnno20)
mouse	mouse_brain_rep1	3M	ReduceAnno20	Bambu	Pearson	0.98229	Bambu(ReduceAnno20)
mouse	mouse_brain_rep1	3M	ReduceAnno20	Bambu	Spearman	0.979772	Bambu(ReduceAnno20)
mouse	mouse_heart_rep1	3M	ReduceAnno40	Bambu	CCC.est	0.979127	Bambu(ReduceAnno40)
mouse	mouse_heart_rep1	3M	ReduceAnno40	Bambu	NRMSE	0.10729	Bambu(ReduceAnno40)
mouse	mouse_heart_rep1	3M	ReduceAnno40	Bambu	Pearson	0.97951	Bambu(ReduceAnno40)
mouse	mouse_heart_rep1	3M	ReduceAnno40	Bambu	Spearman	0.975399	Bambu(ReduceAnno40)
human	human_brain_rep2	6M	ReduceAnno20	Bambu	CCC.est	0.974906	Bambu(ReduceAnno20)
human	human_brain_rep2	6M	ReduceAnno20	Bambu	NRMSE	0.107452	Bambu(ReduceAnno20)
human	human_brain_rep2	6M	ReduceAnno20	Bambu	Pearson	0.975358	Bambu(ReduceAnno20)
human	human_brain_rep2	6M	ReduceAnno20	Bambu	Spearman	0.967831	Bambu(ReduceAnno20)
human	human_heart_rep2	6M	ReduceAnno20	Bambu	CCC.est	0.976677	Bambu(ReduceAnno20)
human	human_heart_rep2	6M	ReduceAnno20	Bambu	NRMSE	0.107802	Bambu(ReduceAnno20)
human	human_heart_rep2	6M	ReduceAnno20	Bambu	Pearson	0.977018	Bambu(ReduceAnno20)
human	human_heart_rep2	6M	ReduceAnno20	Bambu	Spearman	0.968279	Bambu(ReduceAnno20)
mouse	mouse_heart_rep1	3M	ReduceAnno20	Bambu	CCC.est	0.97887	Bambu(ReduceAnno20)
mouse	mouse_heart_rep1	3M	ReduceAnno20	Bambu	NRMSE	0.109741	Bambu(ReduceAnno20)
mouse	mouse_heart_rep1	3M	ReduceAnno20	Bambu	Pearson	0.979203	Bambu(ReduceAnno20)
mouse	mouse_heart_rep1	3M	ReduceAnno20	Bambu	Spearman	0.973801	Bambu(ReduceAnno20)
human	human_brain_rep1	6M	ReduceAnno40	Bambu	CCC.est	0.981639	Bambu(ReduceAnno40)
human	human_brain_rep1	6M	ReduceAnno40	Bambu	NRMSE	0.113207	Bambu(ReduceAnno40)
human	human_brain_rep1	6M	ReduceAnno40	Bambu	Pearson	0.981913	Bambu(ReduceAnno40)
human	human_brain_rep1	6M	ReduceAnno40	Bambu	Spearman	0.977571	Bambu(ReduceAnno40)
human	human_heart_rep1	12M	ReduceAnno20	Bambu	CCC.est	0.972189	Bambu(ReduceAnno20)
human	human_heart_rep1	12M	ReduceAnno20	Bambu	NRMSE	0.11457	Bambu(ReduceAnno20)
human	human_heart_rep1	12M	ReduceAnno20	Bambu	Pearson	0.972579	Bambu(ReduceAnno20)
human	human_heart_rep1	12M	ReduceAnno20	Bambu	Spearman	0.966829	Bambu(ReduceAnno20)
human	human_heart_rep2	3M	ReduceAnno40	Bambu	CCC.est	0.979386	Bambu(ReduceAnno40)
human	human_heart_rep2	3M	ReduceAnno40	Bambu	NRMSE	0.119761	Bambu(ReduceAnno40)
human	human_heart_rep2	3M	ReduceAnno40	Bambu	Pearson	0.979688	Bambu(ReduceAnno40)
human	human_heart_rep2	3M	ReduceAnno40	Bambu	Spearman	0.974403	Bambu(ReduceAnno40)
human	human_brain_rep2	3M	ReduceAnno40	Bambu	CCC.est	0.977791	Bambu(ReduceAnno40)
human	human_brain_rep2	3M	ReduceAnno40	Bambu	NRMSE	0.120282	Bambu(ReduceAnno40)
human	human_brain_rep2	3M	ReduceAnno40	Bambu	Pearson	0.978232	Bambu(ReduceAnno40)
human	human_brain_rep2	3M	ReduceAnno40	Bambu	Spearman	0.97458	Bambu(ReduceAnno40)
human	human_heart_rep1	6M	ReduceAnno40	Bambu	CCC.est	0.979208	Bambu(ReduceAnno40)
human	human_heart_rep1	6M	ReduceAnno40	Bambu	NRMSE	0.120887	Bambu(ReduceAnno40)
human	human_heart_rep1	6M	ReduceAnno40	Bambu	Pearson	0.979509	Bambu(ReduceAnno40)
human	human_heart_rep1	6M	ReduceAnno40	Bambu	Spearman	0.976718	Bambu(ReduceAnno40)
human	human_brain_rep1	6M	ReduceAnno20	Bambu	CCC.est	0.978906	Bambu(ReduceAnno20)
human	human_brain_rep1	6M	ReduceAnno20	Bambu	NRMSE	0.123181	Bambu(ReduceAnno20)
human	human_brain_rep1	6M	ReduceAnno20	Bambu	Pearson	0.979246	Bambu(ReduceAnno20)
human	human_brain_rep1	6M	ReduceAnno20	Bambu	Spearman	0.973747	Bambu(ReduceAnno20)
human	human_heart_rep2	3M	ReduceAnno20	Bambu	CCC.est	0.97762	Bambu(ReduceAnno20)
human	human_heart_rep2	3M	ReduceAnno20	Bambu	NRMSE	0.126455	Bambu(ReduceAnno20)
human	human_heart_rep2	3M	ReduceAnno20	Bambu	Pearson	0.977969	Bambu(ReduceAnno20)
human	human_heart_rep2	3M	ReduceAnno20	Bambu	Spearman	0.970592	Bambu(ReduceAnno20)
human	human_brain_rep2	3M	ReduceAnno20	Bambu	CCC.est	0.975886	Bambu(ReduceAnno20)
human	human_brain_rep2	3M	ReduceAnno20	Bambu	NRMSE	0.127057	Bambu(ReduceAnno20)
human	human_brain_rep2	3M	ReduceAnno20	Bambu	Pearson	0.976351	Bambu(ReduceAnno20)
human	human_brain_rep2	3M	ReduceAnno20	Bambu	Spearman	0.970284	Bambu(ReduceAnno20)
human	human_heart_rep1	6M	ReduceAnno20	Bambu	CCC.est	0.975805	Bambu(ReduceAnno20)
human	human_heart_rep1	6M	ReduceAnno20	Bambu	NRMSE	0.132141	Bambu(ReduceAnno20)
human	human_heart_rep1	6M	ReduceAnno20	Bambu	Pearson	0.976174	Bambu(ReduceAnno20)
human	human_heart_rep1	6M	ReduceAnno20	Bambu	Spearman	0.971957	Bambu(ReduceAnno20)
human	human_brain_rep1	3M	ReduceAnno40	Bambu	CCC.est	0.98162	Bambu(ReduceAnno40)
human	human_brain_rep1	3M	ReduceAnno40	Bambu	NRMSE	0.132942	Bambu(ReduceAnno40)
human	human_brain_rep1	3M	ReduceAnno40	Bambu	Pearson	0.981987	Bambu(ReduceAnno40)
human	human_brain_rep1	3M	ReduceAnno40	Bambu	Spearman	0.978978	Bambu(ReduceAnno40)
human	human_heart_rep1	3M	ReduceAnno40	Bambu	CCC.est	0.97887	Bambu(ReduceAnno40)
human	human_heart_rep1	3M	ReduceAnno40	Bambu	NRMSE	0.14322	Bambu(ReduceAnno40)
human	human_heart_rep1	3M	ReduceAnno40	Bambu	Pearson	0.979258	Bambu(ReduceAnno40)
human	human_heart_rep1	3M	ReduceAnno40	Bambu	Spearman	0.977546	Bambu(ReduceAnno40)
human	human_brain_rep1	3M	ReduceAnno20	Bambu	CCC.est	0.979522	Bambu(ReduceAnno20)
human	human_brain_rep1	3M	ReduceAnno20	Bambu	NRMSE	0.145026	Bambu(ReduceAnno20)
human	human_brain_rep1	3M	ReduceAnno20	Bambu	Pearson	0.979903	Bambu(ReduceAnno20)
human	human_brain_rep1	3M	ReduceAnno20	Bambu	Spearman	0.97547	Bambu(ReduceAnno20)
human	human_heart_rep1	3M	ReduceAnno20	Bambu	CCC.est	0.977453	Bambu(ReduceAnno20)
human	human_heart_rep1	3M	ReduceAnno20	Bambu	NRMSE	0.152895	Bambu(ReduceAnno20)
human	human_heart_rep1	3M	ReduceAnno20	Bambu	Pearson	0.977882	Bambu(ReduceAnno20)
human	human_heart_rep1	3M	ReduceAnno20	Bambu	Spearman	0.973955	Bambu(ReduceAnno20)

## Sheet: figure5A Sfig5
Category	Count	sample	tools	anno	Isoform num	Percentage
FSM	32680	flnc1	ISAtools	NoAnno	70614	46.2798
NIC	18296	flnc1	ISAtools	NoAnno	70614	25.9099
NNC	10425	flnc1	ISAtools	NoAnno	70614	14.7634
ISM	6166	flnc1	ISAtools	NoAnno	70614	8.73198
antisense	879	flnc1	ISAtools	NoAnno	70614	1.2448
genic_intron	606	flnc1	ISAtools	NoAnno	70614	0.858187
intergenic	592	flnc1	ISAtools	NoAnno	70614	0.838361
fusion	541	flnc1	ISAtools	NoAnno	70614	0.766137
genic	429	flnc1	ISAtools	NoAnno	70614	0.607528
FSM	67617	flnc1	ISAtools	FullAnno	100889	67.0212
NIC	17995	flnc1	ISAtools	FullAnno	100889	17.8364
NNC	9747	flnc1	ISAtools	FullAnno	100889	9.66111
ISM	2486	flnc1	ISAtools	FullAnno	100889	2.46409
antisense	879	flnc1	ISAtools	FullAnno	100889	0.871255
genic_intron	606	flnc1	ISAtools	FullAnno	100889	0.60066
intergenic	592	flnc1	ISAtools	FullAnno	100889	0.586783
fusion	538	flnc1	ISAtools	FullAnno	100889	0.533259
genic	429	flnc1	ISAtools	FullAnno	100889	0.42522
FSM	22920	flnc1	IsoQuant	NoAnno	60793	37.7017
NNC	13727	flnc1	IsoQuant	NoAnno	60793	22.5799
NIC	9908	flnc1	IsoQuant	NoAnno	60793	16.2979
ISM	5774	flnc1	IsoQuant	NoAnno	60793	9.4978
genic_intron	2965	flnc1	IsoQuant	NoAnno	60793	4.87721
antisense	1737	flnc1	IsoQuant	NoAnno	60793	2.85724
intergenic	1350	flnc1	IsoQuant	NoAnno	60793	2.22065
fusion	1280	flnc1	IsoQuant	NoAnno	60793	2.10551
genic	1132	flnc1	IsoQuant	NoAnno	60793	1.86206
FSM	39821	flnc1	IsoQuant	FullAnno	76684	51.9287
NNC	13081	flnc1	IsoQuant	FullAnno	76684	17.0583
NIC	9734	flnc1	IsoQuant	FullAnno	76684	12.6937
ISM	5682	flnc1	IsoQuant	FullAnno	76684	7.40963
genic_intron	2968	flnc1	IsoQuant	FullAnno	76684	3.87043
antisense	1740	flnc1	IsoQuant	FullAnno	76684	2.26905
intergenic	1340	flnc1	IsoQuant	FullAnno	76684	1.74743
fusion	1202	flnc1	IsoQuant	FullAnno	76684	1.56747
genic	1116	flnc1	IsoQuant	FullAnno	76684	1.45532
FSM	23335	flnc1	Bambu	NoAnno	48467	48.1462
ISM	10544	flnc1	Bambu	NoAnno	48467	21.755
NIC	4430	flnc1	Bambu	NoAnno	48467	9.14024
NNC	4208	flnc1	Bambu	NoAnno	48467	8.6822
genic_intron	2361	flnc1	Bambu	NoAnno	48467	4.87136
antisense	1725	flnc1	Bambu	NoAnno	48467	3.55912
intergenic	1167	flnc1	Bambu	NoAnno	48467	2.40782
genic	362	flnc1	Bambu	NoAnno	48467	0.7469
fusion	335	flnc1	Bambu	NoAnno	48467	0.691192
FSM	89799	flnc1	Bambu	FullAnno	90119	99.6449
NIC	133	flnc1	Bambu	FullAnno	90119	0.147583
NNC	81	flnc1	Bambu	FullAnno	90119	0.0898812
antisense	41	flnc1	Bambu	FullAnno	90119	0.0454954
fusion	30	flnc1	Bambu	FullAnno	90119	0.0332893
intergenic	21	flnc1	Bambu	FullAnno	90119	0.0233025
genic	7	flnc1	Bambu	FullAnno	90119	0.00776751
genic_intron	7	flnc1	Bambu	FullAnno	90119	0.00776751
FSM	37575	flnc1	Mandalorion	NoAnno	70762	53.1005
ISM	14365	flnc1	Mandalorion	NoAnno	70762	20.3004
NIC	11366	flnc1	Mandalorion	NoAnno	70762	16.0623
NNC	5864	flnc1	Mandalorion	NoAnno	70762	8.28693
antisense	542	flnc1	Mandalorion	NoAnno	70762	0.765948
fusion	368	flnc1	Mandalorion	NoAnno	70762	0.520053
intergenic	283	flnc1	Mandalorion	NoAnno	70762	0.399932
genic_intron	267	flnc1	Mandalorion	NoAnno	70762	0.377321
genic	132	flnc1	Mandalorion	NoAnno	70762	0.186541
FSM	39619	flnc1	Mandalorion	FullAnno	73698	53.7586
ISM	13938	flnc1	Mandalorion	FullAnno	73698	18.9123
NIC	12575	flnc1	Mandalorion	FullAnno	73698	17.0629
NNC	6003	flnc1	Mandalorion	FullAnno	73698	8.1454
antisense	498	flnc1	Mandalorion	FullAnno	73698	0.675731
fusion	403	flnc1	Mandalorion	FullAnno	73698	0.546826
intergenic	276	flnc1	Mandalorion	FullAnno	73698	0.374501
genic_intron	262	flnc1	Mandalorion	FullAnno	73698	0.355505
genic	124	flnc1	Mandalorion	FullAnno	73698	0.168254
FSM	33256	flnc2	ISAtools	NoAnno	71691	46.388
NIC	18795	flnc2	ISAtools	NoAnno	71691	26.2167
NNC	10585	flnc2	ISAtools	NoAnno	71691	14.7648
ISM	6062	flnc2	ISAtools	NoAnno	71691	8.45573
antisense	866	flnc2	ISAtools	NoAnno	71691	1.20796
fusion	595	flnc2	ISAtools	NoAnno	71691	0.829951
intergenic	571	flnc2	ISAtools	NoAnno	71691	0.796474
genic_intron	569	flnc2	ISAtools	NoAnno	71691	0.793684
genic	392	flnc2	ISAtools	NoAnno	71691	0.546791
FSM	68481	flnc2	ISAtools	FullAnno	102235	66.9839
NIC	18488	flnc2	ISAtools	FullAnno	102235	18.0838
NNC	9902	flnc2	ISAtools	FullAnno	102235	9.68553
ISM	2374	flnc2	ISAtools	FullAnno	102235	2.3221
antisense	866	flnc2	ISAtools	FullAnno	102235	0.847068
fusion	593	flnc2	ISAtools	FullAnno	102235	0.580036
intergenic	571	flnc2	ISAtools	FullAnno	102235	0.558517
genic_intron	568	flnc2	ISAtools	FullAnno	102235	0.555583
genic	392	flnc2	ISAtools	FullAnno	102235	0.38343
FSM	22963	flnc2	IsoQuant	NoAnno	61170	37.5396
NNC	13872	flnc2	IsoQuant	NoAnno	61170	22.6778
NIC	9984	flnc2	IsoQuant	NoAnno	61170	16.3217
ISM	5823	flnc2	IsoQuant	NoAnno	61170	9.51937
genic_intron	2951	flnc2	IsoQuant	NoAnno	61170	4.82426
antisense	1776	flnc2	IsoQuant	NoAnno	61170	2.90338
intergenic	1364	flnc2	IsoQuant	NoAnno	61170	2.22985
fusion	1331	flnc2	IsoQuant	NoAnno	61170	2.1759
genic	1106	flnc2	IsoQuant	NoAnno	61170	1.80808
FSM	40023	flnc2	IsoQuant	FullAnno	77217	51.8319
NNC	13224	flnc2	IsoQuant	FullAnno	77217	17.1258
NIC	9831	flnc2	IsoQuant	FullAnno	77217	12.7317
ISM	5712	flnc2	IsoQuant	FullAnno	77217	7.39733
genic_intron	2965	flnc2	IsoQuant	FullAnno	77217	3.83983
antisense	1778	flnc2	IsoQuant	FullAnno	77217	2.3026
intergenic	1351	flnc2	IsoQuant	FullAnno	77217	1.74961
fusion	1249	flnc2	IsoQuant	FullAnno	77217	1.61752
genic	1084	flnc2	IsoQuant	FullAnno	77217	1.40384
FSM	23238	flnc2	Bambu	NoAnno	47888	48.5257
ISM	10261	flnc2	Bambu	NoAnno	47888	21.4271
NIC	4350	flnc2	Bambu	NoAnno	47888	9.0837
NNC	4219	flnc2	Bambu	NoAnno	47888	8.81014
genic_intron	2322	flnc2	Bambu	NoAnno	47888	4.84881
antisense	1685	flnc2	Bambu	NoAnno	47888	3.51863
intergenic	1120	flnc2	Bambu	NoAnno	47888	2.33879
genic	355	flnc2	Bambu	NoAnno	47888	0.741313
fusion	338	flnc2	Bambu	NoAnno	47888	0.705814
FSM	90467	flnc2	Bambu	FullAnno	90786	99.6486
NIC	133	flnc2	Bambu	FullAnno	90786	0.146498
NNC	80	flnc2	Bambu	FullAnno	90786	0.0881193
antisense	40	flnc2	Bambu	FullAnno	90786	0.0440597
fusion	32	flnc2	Bambu	FullAnno	90786	0.0352477
intergenic	20	flnc2	Bambu	FullAnno	90786	0.0220298
genic	7	flnc2	Bambu	FullAnno	90786	0.00771044
genic_intron	7	flnc2	Bambu	FullAnno	90786	0.00771044
FSM	37878	flnc2	Mandalorion	NoAnno	71420	53.0356
ISM	14446	flnc2	Mandalorion	NoAnno	71420	20.2268
NIC	11486	flnc2	Mandalorion	NoAnno	71420	16.0823
NNC	5980	flnc2	Mandalorion	NoAnno	71420	8.373
antisense	568	flnc2	Mandalorion	NoAnno	71420	0.795295
fusion	370	flnc2	Mandalorion	NoAnno	71420	0.518062
intergenic	302	flnc2	Mandalorion	NoAnno	71420	0.422851
genic_intron	267	flnc2	Mandalorion	NoAnno	71420	0.373845
genic	123	flnc2	Mandalorion	NoAnno	71420	0.172221
FSM	39920	flnc2	Mandalorion	FullAnno	74345	53.6956
ISM	14020	flnc2	Mandalorion	FullAnno	74345	18.858
NIC	12706	flnc2	Mandalorion	FullAnno	74345	17.0906
NNC	6117	flnc2	Mandalorion	FullAnno	74345	8.22786
antisense	514	flnc2	Mandalorion	FullAnno	74345	0.691371
fusion	395	flnc2	Mandalorion	FullAnno	74345	0.531307
intergenic	295	flnc2	Mandalorion	FullAnno	74345	0.396799
genic_intron	258	flnc2	Mandalorion	FullAnno	74345	0.347031
genic	120	flnc2	Mandalorion	FullAnno	74345	0.16141
FSM	31993	flnc3	ISAtools	NoAnno	67019	47.7372
NIC	16648	flnc3	ISAtools	NoAnno	67019	24.8407
NNC	9518	flnc3	ISAtools	NoAnno	67019	14.2019
ISM	6067	flnc3	ISAtools	NoAnno	67019	9.05266
antisense	848	flnc3	ISAtools	NoAnno	67019	1.26531
genic_intron	559	flnc3	ISAtools	NoAnno	67019	0.834092
intergenic	537	flnc3	ISAtools	NoAnno	67019	0.801265
fusion	487	flnc3	ISAtools	NoAnno	67019	0.72666
genic	362	flnc3	ISAtools	NoAnno	67019	0.540145
FSM	66326	flnc3	ISAtools	FullAnno	96875	68.4655
NIC	16357	flnc3	ISAtools	FullAnno	96875	16.8846
NNC	8922	flnc3	ISAtools	FullAnno	96875	9.20981
ISM	2480	flnc3	ISAtools	FullAnno	96875	2.56
antisense	848	flnc3	ISAtools	FullAnno	96875	0.875355
genic_intron	559	flnc3	ISAtools	FullAnno	96875	0.577032
intergenic	537	flnc3	ISAtools	FullAnno	96875	0.554323
fusion	484	flnc3	ISAtools	FullAnno	96875	0.499613
genic	362	flnc3	ISAtools	FullAnno	96875	0.373677
FSM	22749	flnc3	IsoQuant	NoAnno	60236	37.7665
NNC	13555	flnc3	IsoQuant	NoAnno	60236	22.5032
NIC	9745	flnc3	IsoQuant	NoAnno	60236	16.178
ISM	5737	flnc3	IsoQuant	NoAnno	60236	9.5242
genic_intron	2972	flnc3	IsoQuant	NoAnno	60236	4.93393
antisense	1773	flnc3	IsoQuant	NoAnno	60236	2.94342
intergenic	1338	flnc3	IsoQuant	NoAnno	60236	2.22126
fusion	1279	flnc3	IsoQuant	NoAnno	60236	2.12331
genic	1088	flnc3	IsoQuant	NoAnno	60236	1.80623
FSM	39826	flnc3	IsoQuant	FullAnno	76284	52.2075
NNC	12901	flnc3	IsoQuant	FullAnno	76284	16.9118
NIC	9557	flnc3	IsoQuant	FullAnno	76284	12.5282
ISM	5658	flnc3	IsoQuant	FullAnno	76284	7.41702
genic_intron	2979	flnc3	IsoQuant	FullAnno	76284	3.90514
antisense	1775	flnc3	IsoQuant	FullAnno	76284	2.32683
intergenic	1318	flnc3	IsoQuant	FullAnno	76284	1.72775
fusion	1199	flnc3	IsoQuant	FullAnno	76284	1.57176
genic	1071	flnc3	IsoQuant	FullAnno	76284	1.40396
FSM	23233	flnc3	Bambu	NoAnno	47864	48.5396
ISM	10547	flnc3	Bambu	NoAnno	47864	22.0354
NIC	4329	flnc3	Bambu	NoAnno	47864	9.04438
NNC	4048	flnc3	Bambu	NoAnno	47864	8.4573
genic_intron	2280	flnc3	Bambu	NoAnno	47864	4.7635
antisense	1659	flnc3	Bambu	NoAnno	47864	3.46607
intergenic	1072	flnc3	Bambu	NoAnno	47864	2.23968
genic	360	flnc3	Bambu	NoAnno	47864	0.752131
fusion	336	flnc3	Bambu	NoAnno	47864	0.701989
FSM	88777	flnc3	Bambu	FullAnno	89098	99.6397
NIC	133	flnc3	Bambu	FullAnno	89098	0.149274
NNC	81	flnc3	Bambu	FullAnno	89098	0.0909111
antisense	42	flnc3	Bambu	FullAnno	89098	0.0471391
fusion	32	flnc3	Bambu	FullAnno	89098	0.0359155
intergenic	19	flnc3	Bambu	FullAnno	89098	0.0213248
genic	7	flnc3	Bambu	FullAnno	89098	0.00785652
genic_intron	7	flnc3	Bambu	FullAnno	89098	0.00785652
FSM	37079	flnc3	Mandalorion	NoAnno	68976	53.7564
ISM	13812	flnc3	Mandalorion	NoAnno	68976	20.0244
NIC	10979	flnc3	Mandalorion	NoAnno	68976	15.9171
NNC	5582	flnc3	Mandalorion	NoAnno	68976	8.09267
antisense	526	flnc3	Mandalorion	NoAnno	68976	0.762584
fusion	353	flnc3	Mandalorion	NoAnno	68976	0.511772
genic_intron	266	flnc3	Mandalorion	NoAnno	68976	0.385641
intergenic	263	flnc3	Mandalorion	NoAnno	68976	0.381292
genic	116	flnc3	Mandalorion	NoAnno	68976	0.168174
FSM	39085	flnc3	Mandalorion	FullAnno	71845	54.4018
ISM	13435	flnc3	Mandalorion	FullAnno	71845	18.7
NIC	12122	flnc3	Mandalorion	FullAnno	71845	16.8724
NNC	5714	flnc3	Mandalorion	FullAnno	71845	7.95323
antisense	481	flnc3	Mandalorion	FullAnno	71845	0.669497
fusion	381	flnc3	Mandalorion	FullAnno	71845	0.530308
genic_intron	261	flnc3	Mandalorion	FullAnno	71845	0.363282
intergenic	257	flnc3	Mandalorion	FullAnno	71845	0.357715
genic	109	flnc3	Mandalorion	FullAnno	71845	0.151715
FSM	32029	flnc4	ISAtools	NoAnno	68011	47.0939
NIC	17869	flnc4	ISAtools	NoAnno	68011	26.2737
NNC	9781	flnc4	ISAtools	NoAnno	68011	14.3815
ISM	5660	flnc4	ISAtools	NoAnno	68011	8.32218
antisense	806	flnc4	ISAtools	NoAnno	68011	1.1851
fusion	535	flnc4	ISAtools	NoAnno	68011	0.786637
intergenic	502	flnc4	ISAtools	NoAnno	68011	0.738116
genic_intron	461	flnc4	ISAtools	NoAnno	68011	0.677832
genic	368	flnc4	ISAtools	NoAnno	68011	0.541089
FSM	66018	flnc4	ISAtools	FullAnno	97678	67.5874
NIC	17579	flnc4	ISAtools	FullAnno	97678	17.9969
NNC	9099	flnc4	ISAtools	FullAnno	97678	9.3153
ISM	2311	flnc4	ISAtools	FullAnno	97678	2.36594
antisense	806	flnc4	ISAtools	FullAnno	97678	0.82516
fusion	534	flnc4	ISAtools	FullAnno	97678	0.546694
intergenic	502	flnc4	ISAtools	FullAnno	97678	0.513934
genic_intron	461	flnc4	ISAtools	FullAnno	97678	0.471959
genic	368	flnc4	ISAtools	FullAnno	97678	0.376748
FSM	22474	flnc4	IsoQuant	NoAnno	59409	37.8293
NNC	13386	flnc4	IsoQuant	NoAnno	59409	22.5319
NIC	9725	flnc4	IsoQuant	NoAnno	59409	16.3696
ISM	5683	flnc4	IsoQuant	NoAnno	59409	9.56589
genic_intron	2805	flnc4	IsoQuant	NoAnno	59409	4.72151
antisense	1685	flnc4	IsoQuant	NoAnno	59409	2.83627
fusion	1305	flnc4	IsoQuant	NoAnno	59409	2.19664
intergenic	1261	flnc4	IsoQuant	NoAnno	59409	2.12257
genic	1085	flnc4	IsoQuant	NoAnno	59409	1.82632
FSM	38415	flnc4	IsoQuant	FullAnno	74356	51.6636
NNC	12754	flnc4	IsoQuant	FullAnno	74356	17.1526
NIC	9579	flnc4	IsoQuant	FullAnno	74356	12.8826
ISM	5591	flnc4	IsoQuant	FullAnno	74356	7.51923
genic_intron	2806	flnc4	IsoQuant	FullAnno	74356	3.77374
antisense	1682	flnc4	IsoQuant	FullAnno	74356	2.26209
intergenic	1253	flnc4	IsoQuant	FullAnno	74356	1.68514
fusion	1210	flnc4	IsoQuant	FullAnno	74356	1.62731
genic	1066	flnc4	IsoQuant	FullAnno	74356	1.43364
FSM	22856	flnc4	Bambu	NoAnno	46588	49.0598
ISM	9830	flnc4	Bambu	NoAnno	46588	21.0999
NIC	4315	flnc4	Bambu	NoAnno	46588	9.26204
NNC	4053	flnc4	Bambu	NoAnno	46588	8.69967
genic_intron	2232	flnc4	Bambu	NoAnno	46588	4.79093
antisense	1585	flnc4	Bambu	NoAnno	46588	3.40216
intergenic	1035	flnc4	Bambu	NoAnno	46588	2.2216
genic	342	flnc4	Bambu	NoAnno	46588	0.734095
fusion	340	flnc4	Bambu	NoAnno	46588	0.729802
FSM	87175	flnc4	Bambu	FullAnno	87492	99.6377
NIC	133	flnc4	Bambu	FullAnno	87492	0.152014
NNC	81	flnc4	Bambu	FullAnno	87492	0.0925799
antisense	41	flnc4	Bambu	FullAnno	87492	0.0468614
fusion	30	flnc4	Bambu	FullAnno	87492	0.0342888
intergenic	18	flnc4	Bambu	FullAnno	87492	0.0205733
genic	7	flnc4	Bambu	FullAnno	87492	0.00800073
genic_intron	7	flnc4	Bambu	FullAnno	87492	0.00800073
FSM	37317	flnc4	Mandalorion	NoAnno	69885	53.3977
ISM	14040	flnc4	Mandalorion	NoAnno	69885	20.0901
NIC	11237	flnc4	Mandalorion	NoAnno	69885	16.0793
NNC	5737	flnc4	Mandalorion	NoAnno	69885	8.2092
antisense	567	flnc4	Mandalorion	NoAnno	69885	0.811333
fusion	350	flnc4	Mandalorion	NoAnno	69885	0.500823
genic_intron	271	flnc4	Mandalorion	NoAnno	69885	0.38778
intergenic	245	flnc4	Mandalorion	NoAnno	69885	0.350576
genic	121	flnc4	Mandalorion	NoAnno	69885	0.173142
FSM	39278	flnc4	Mandalorion	FullAnno	72782	53.9666
ISM	13662	flnc4	Mandalorion	FullAnno	72782	18.7711
NIC	12454	flnc4	Mandalorion	FullAnno	72782	17.1114
NNC	5882	flnc4	Mandalorion	FullAnno	72782	8.08167
antisense	508	flnc4	Mandalorion	FullAnno	72782	0.697975
fusion	383	flnc4	Mandalorion	FullAnno	72782	0.526229
genic_intron	262	flnc4	Mandalorion	FullAnno	72782	0.359979
intergenic	239	flnc4	Mandalorion	FullAnno	72782	0.328378
genic	114	flnc4	Mandalorion	FullAnno	72782	0.156632
FSM	31996	flnc5	ISAtools	NoAnno	68154	46.9466
NIC	17982	flnc5	ISAtools	NoAnno	68154	26.3844
NNC	9708	flnc5	ISAtools	NoAnno	68154	14.2442
ISM	5721	flnc5	ISAtools	NoAnno	68154	8.39422
antisense	781	flnc5	ISAtools	NoAnno	68154	1.14593
fusion	561	flnc5	ISAtools	NoAnno	68154	0.823136
genic_intron	531	flnc5	ISAtools	NoAnno	68154	0.779118
intergenic	519	flnc5	ISAtools	NoAnno	68154	0.761511
genic	355	flnc5	ISAtools	NoAnno	68154	0.520879
FSM	65872	flnc5	ISAtools	FullAnno	97692	67.4282
NIC	17705	flnc5	ISAtools	FullAnno	97692	18.1233
NNC	9064	flnc5	ISAtools	FullAnno	97692	9.27814
ISM	2308	flnc5	ISAtools	FullAnno	97692	2.36253
antisense	781	flnc5	ISAtools	FullAnno	97692	0.799451
fusion	557	flnc5	ISAtools	FullAnno	97692	0.570159
genic_intron	531	flnc5	ISAtools	FullAnno	97692	0.543545
intergenic	519	flnc5	ISAtools	FullAnno	97692	0.531262
genic	355	flnc5	ISAtools	FullAnno	97692	0.363387
FSM	22407	flnc5	IsoQuant	NoAnno	59265	37.8081
NNC	13300	flnc5	IsoQuant	NoAnno	59265	22.4416
NIC	9782	flnc5	IsoQuant	NoAnno	59265	16.5055
ISM	5684	flnc5	IsoQuant	NoAnno	59265	9.59082
genic_intron	2805	flnc5	IsoQuant	NoAnno	59265	4.73298
antisense	1683	flnc5	IsoQuant	NoAnno	59265	2.83979
fusion	1292	flnc5	IsoQuant	NoAnno	59265	2.18004
intergenic	1268	flnc5	IsoQuant	NoAnno	59265	2.13954
genic	1044	flnc5	IsoQuant	NoAnno	59265	1.76158
FSM	38210	flnc5	IsoQuant	FullAnno	74179	51.5105
NNC	12747	flnc5	IsoQuant	FullAnno	74179	17.1841
NIC	9606	flnc5	IsoQuant	FullAnno	74179	12.9498
ISM	5601	flnc5	IsoQuant	FullAnno	74179	7.55065
genic_intron	2815	flnc5	IsoQuant	FullAnno	74179	3.79487
antisense	1683	flnc5	IsoQuant	FullAnno	74179	2.26884
intergenic	1256	flnc5	IsoQuant	FullAnno	74179	1.6932
fusion	1224	flnc5	IsoQuant	FullAnno	74179	1.65006
genic	1037	flnc5	IsoQuant	FullAnno	74179	1.39797
FSM	22823	flnc5	Bambu	NoAnno	46385	49.2034
ISM	9696	flnc5	Bambu	NoAnno	46385	20.9033
NIC	4288	flnc5	Bambu	NoAnno	46385	9.24437
NNC	3980	flnc5	Bambu	NoAnno	46385	8.58036
genic_intron	2251	flnc5	Bambu	NoAnno	46385	4.85286
antisense	1620	flnc5	Bambu	NoAnno	46385	3.49251
intergenic	1054	flnc5	Bambu	NoAnno	46385	2.27229
genic	348	flnc5	Bambu	NoAnno	46385	0.750243
fusion	325	flnc5	Bambu	NoAnno	46385	0.700658
FSM	86724	flnc5	Bambu	FullAnno	87044	99.6324
NIC	133	flnc5	Bambu	FullAnno	87044	0.152796
NNC	80	flnc5	Bambu	FullAnno	87044	0.0919075
antisense	42	flnc5	Bambu	FullAnno	87044	0.0482515
fusion	32	flnc5	Bambu	FullAnno	87044	0.036763
intergenic	19	flnc5	Bambu	FullAnno	87044	0.021828
genic	7	flnc5	Bambu	FullAnno	87044	0.00804191
genic_intron	7	flnc5	Bambu	FullAnno	87044	0.00804191
FSM	37139	flnc5	Mandalorion	NoAnno	69827	53.1872
ISM	14115	flnc5	Mandalorion	NoAnno	69827	20.2142
NIC	11240	flnc5	Mandalorion	NoAnno	69827	16.0969
NNC	5784	flnc5	Mandalorion	NoAnno	69827	8.28333
antisense	535	flnc5	Mandalorion	NoAnno	69827	0.766179
fusion	364	flnc5	Mandalorion	NoAnno	69827	0.521288
genic_intron	274	flnc5	Mandalorion	NoAnno	69827	0.392398
intergenic	255	flnc5	Mandalorion	NoAnno	69827	0.365188
genic	121	flnc5	Mandalorion	NoAnno	69827	0.173285
FSM	39117	flnc5	Mandalorion	FullAnno	72663	53.8335
ISM	13719	flnc5	Mandalorion	FullAnno	72663	18.8803
NIC	12424	flnc5	Mandalorion	FullAnno	72663	17.0981
NNC	5904	flnc5	Mandalorion	FullAnno	72663	8.12518
antisense	484	flnc5	Mandalorion	FullAnno	72663	0.666089
fusion	386	flnc5	Mandalorion	FullAnno	72663	0.531219
genic_intron	267	flnc5	Mandalorion	FullAnno	72663	0.36745
intergenic	247	flnc5	Mandalorion	FullAnno	72663	0.339925
genic	115	flnc5	Mandalorion	FullAnno	72663	0.158265
FSM	33055	flnc6	ISAtools	NoAnno	71534	46.2088
NIC	19153	flnc6	ISAtools	NoAnno	71534	26.7747
NNC	10567	flnc6	ISAtools	NoAnno	71534	14.772
ISM	5766	flnc6	ISAtools	NoAnno	71534	8.0605
antisense	909	flnc6	ISAtools	NoAnno	71534	1.27072
intergenic	611	flnc6	ISAtools	NoAnno	71534	0.854139
fusion	550	flnc6	ISAtools	NoAnno	71534	0.768865
genic_intron	523	flnc6	ISAtools	NoAnno	71534	0.731121
genic	400	flnc6	ISAtools	NoAnno	71534	0.559175
FSM	67822	flnc6	ISAtools	FullAnno	101851	66.5894
NIC	18831	flnc6	ISAtools	FullAnno	101851	18.4888
NNC	9887	flnc6	ISAtools	FullAnno	101851	9.70732
ISM	2322	flnc6	ISAtools	FullAnno	101851	2.2798
antisense	909	flnc6	ISAtools	FullAnno	101851	0.89248
intergenic	611	flnc6	ISAtools	FullAnno	101851	0.599896
fusion	546	flnc6	ISAtools	FullAnno	101851	0.536077
genic_intron	523	flnc6	ISAtools	FullAnno	101851	0.513495
genic	400	flnc6	ISAtools	FullAnno	101851	0.392731
FSM	22672	flnc6	IsoQuant	NoAnno	60329	37.5806
NNC	13633	flnc6	IsoQuant	NoAnno	60329	22.5978
NIC	9889	flnc6	IsoQuant	NoAnno	60329	16.3918
ISM	5768	flnc6	IsoQuant	NoAnno	60329	9.56091
genic_intron	2901	flnc6	IsoQuant	NoAnno	60329	4.80863
antisense	1753	flnc6	IsoQuant	NoAnno	60329	2.90573
fusion	1318	flnc6	IsoQuant	NoAnno	60329	2.18469
intergenic	1289	flnc6	IsoQuant	NoAnno	60329	2.13662
genic	1106	flnc6	IsoQuant	NoAnno	60329	1.83328
FSM	39108	flnc6	IsoQuant	FullAnno	75877	51.5413
NNC	13050	flnc6	IsoQuant	FullAnno	75877	17.1989
NIC	9733	flnc6	IsoQuant	FullAnno	75877	12.8273
ISM	5693	flnc6	IsoQuant	FullAnno	75877	7.50293
genic_intron	2913	flnc6	IsoQuant	FullAnno	75877	3.83911
antisense	1754	flnc6	IsoQuant	FullAnno	75877	2.31164
intergenic	1281	flnc6	IsoQuant	FullAnno	75877	1.68826
fusion	1255	flnc6	IsoQuant	FullAnno	75877	1.65399
genic	1090	flnc6	IsoQuant	FullAnno	75877	1.43654
FSM	22987	flnc6	Bambu	NoAnno	46994	48.9148
ISM	9762	flnc6	Bambu	NoAnno	46994	20.7729
NIC	4336	flnc6	Bambu	NoAnno	46994	9.22671
NNC	4180	flnc6	Bambu	NoAnno	46994	8.89475
genic_intron	2281	flnc6	Bambu	NoAnno	46994	4.85381
antisense	1651	flnc6	Bambu	NoAnno	46994	3.51321
intergenic	1110	flnc6	Bambu	NoAnno	46994	2.362
genic	369	flnc6	Bambu	NoAnno	46994	0.785207
fusion	318	flnc6	Bambu	NoAnno	46994	0.676682
FSM	88907	flnc6	Bambu	FullAnno	89228	99.6402
NIC	133	flnc6	Bambu	FullAnno	89228	0.149056
NNC	80	flnc6	Bambu	FullAnno	89228	0.089658
antisense	40	flnc6	Bambu	FullAnno	89228	0.044829
fusion	33	flnc6	Bambu	FullAnno	89228	0.0369839
intergenic	21	flnc6	Bambu	FullAnno	89228	0.0235352
genic	7	flnc6	Bambu	FullAnno	89228	0.00784507
genic_intron	7	flnc6	Bambu	FullAnno	89228	0.00784507
FSM	37784	flnc6	Mandalorion	NoAnno	71286	53.0034
ISM	14479	flnc6	Mandalorion	NoAnno	71286	20.3111
NIC	11534	flnc6	Mandalorion	NoAnno	71286	16.1799
NNC	5893	flnc6	Mandalorion	NoAnno	71286	8.2667
antisense	561	flnc6	Mandalorion	NoAnno	71286	0.786971
fusion	369	flnc6	Mandalorion	NoAnno	71286	0.517633
genic_intron	275	flnc6	Mandalorion	NoAnno	71286	0.38577
intergenic	259	flnc6	Mandalorion	NoAnno	71286	0.363325
genic	132	flnc6	Mandalorion	NoAnno	71286	0.18517
FSM	39778	flnc6	Mandalorion	FullAnno	74174	53.628
ISM	14094	flnc6	Mandalorion	FullAnno	74174	19.0013
NIC	12744	flnc6	Mandalorion	FullAnno	74174	17.1812
NNC	6012	flnc6	Mandalorion	FullAnno	74174	8.10527
antisense	503	flnc6	Mandalorion	FullAnno	74174	0.678135
fusion	397	flnc6	Mandalorion	FullAnno	74174	0.535228
genic_intron	269	flnc6	Mandalorion	FullAnno	74174	0.362661
intergenic	252	flnc6	Mandalorion	FullAnno	74174	0.339742
genic	125	flnc6	Mandalorion	FullAnno	74174	0.168523

## Sheet: figure5B
SSC_support	TssTes_support	sample	tools	anno
0.979112	0.976812	flnc6	Mandalorion	NoAnno
0.97971	0.977607	flnc6	Mandalorion	FullAnno
0.843475	0.314542	flnc6	IsoQuant	NoAnno
0.821698	0.466176	flnc6	IsoQuant	FullAnno
0.891241	0.760182	flnc6	Bambu	NoAnno
0.610627	0.289024	flnc6	Bambu	FullAnno
1	1	flnc6	ISAtools	NoAnno
0.998292	0.998076	flnc6	ISAtools	FullAnno
0.978873	0.976852	flnc1	Mandalorion	NoAnno
0.979457	0.977449	flnc1	Mandalorion	FullAnno
0.83202	0.297518	flnc1	IsoQuant	NoAnno
0.811538	0.452637	flnc1	IsoQuant	FullAnno
0.884746	0.752677	flnc1	Bambu	NoAnno
0.607164	0.285833	flnc1	Bambu	FullAnno
1	1	flnc1	ISAtools	NoAnno
0.998246	0.997958	flnc1	ISAtools	FullAnno
0.978479	0.976239	flnc2	Mandalorion	NoAnno
0.979057	0.976986	flnc2	Mandalorion	FullAnno
0.840821	0.310397	flnc2	IsoQuant	NoAnno
0.818693	0.462372	flnc2	IsoQuant	FullAnno
0.890912	0.759334	flnc2	Bambu	NoAnno
0.609731	0.290144	flnc2	Bambu	FullAnno
1	1	flnc2	ISAtools	NoAnno
0.998249	0.998014	flnc2	ISAtools	FullAnno
0.979268	0.976601	flnc3	Mandalorion	NoAnno
0.979748	0.977173	flnc3	Mandalorion	FullAnno
0.824407	0.284365	flnc3	IsoQuant	NoAnno
0.80667	0.4459	flnc3	IsoQuant	FullAnno
0.881727	0.741225	flnc3	Bambu	NoAnno
0.605434	0.286561	flnc3	Bambu	FullAnno
1	1	flnc3	ISAtools	NoAnno
0.998286	0.998059	flnc3	ISAtools	FullAnno
0.978479	0.975774	flnc4	Mandalorion	NoAnno
0.978978	0.976258	flnc4	Mandalorion	FullAnno
0.832685	0.300864	flnc4	IsoQuant	NoAnno
0.813223	0.457865	flnc4	IsoQuant	FullAnno
0.885271	0.752619	flnc4	Bambu	NoAnno
0.608513	0.287946	flnc4	Bambu	FullAnno
1	1	flnc4	ISAtools	NoAnno
0.998208	0.997912	flnc4	ISAtools	FullAnno
0.979034	0.976442	flnc5	Mandalorion	NoAnno
0.979439	0.977045	flnc5	Mandalorion	FullAnno
0.835653	0.303974	flnc5	IsoQuant	NoAnno
0.81519	0.459591	flnc5	IsoQuant	FullAnno
0.884639	0.751558	flnc5	Bambu	NoAnno
0.610369	0.288751	flnc5	Bambu	FullAnno
1	1	flnc5	ISAtools	NoAnno
0.998352	0.998117	flnc5	ISAtools	FullAnno

[truncated: 6 more sheets: figure5C figure5D Sfig6 Sfig7, figure5E, Sfig8, figure6A Sfig9, figure6B Sfig10, figure7]
